# Supplementary material for: Single-cell mapping of maternal–fetal cross-talk in preeclampsia
Source: Research Square preprint supplement (doi:10.21203/rs.3.rs-8254581/v1), 2025-12-08
Supplement: Supplementary file 1 [file ee7baabd5dcee6ffa03b7536.docx]

**Description of Additional Supplementary Files**

File Name: Supplementary Tables 3 to 7

Description:

Supplementary Table 3. Enrichment analysis results from GO, KEGG, and Reactome

Supplementary Table 4. Placental signatures utilized for the integrative analysis

Supplementary Table 5. Placental signatures in maternal circulation during normotensive pregnancy

Supplementary Table 6. Placental signatures in maternal circulation at or after EOPE diagnosis

Supplementary 7. Placental signatures in maternal circulation at the time of EOPE and LOPE diagnosis

File Name: Extended Data Figures

Description:

Extended Data Fig.1. Quality metrics and marker gene expression in single cells of human placenta

Extended Data Fig.2. Marker genes for immune cluster

Extended Data Fig3. Number and strength of interactions
