# Supplementary material for: Single-cell mapping of maternal–fetal cross-talk in preeclampsia
Source: Research Square preprint supplement (doi:10.21203/rs.3.rs-8254581/v1), 2025-12-08
Supplement: Supplementary file 2 [file fa4398f676e015653b4e6f75.xlsx]

## Sheet: Supplementary Table 3
Supplementary Table 3.Enrichment analysis results from GO, KEGG, and Reactome
GO Pathway database																KEGG Pathway database																Reactome Pathway database
Population	ID	Description	setSize	enrichmentScore	NES	pvalue	p.adjust	qvalue	rank	leading_edge	core_enrichment	cname	orderpathways			Population	ID	Description	setSize	enrichmentScore	NES	pvalue	p.adjust	qvalue	rank	leading_edge	core_enrichment	cname	orderpathways			Population	ID	Description	setSize	enrichmentScore	NES	pvalue	p.adjust	qvalue	rank	leading_edge	core_enrichment	cname	orderpathways
Whole PE	GO:0002181	cytoplasmic translation	141	0.687162	2.85666	1e-10	1.0135e-07	9.43553e-08	3241	tags=71%, list=20%, signal=57%	5315/6224/23521/6124/55854/8531/7555/8669/9349/6218/6128/6160/6181/200916/6194/8668/6205/11224/10480/6129/8894/6143/9045/6209/6158/51386/6217/6132/6125/6161/1973/6135/4904/8666/6152/6146/6159/6202/6203/6137/6147/25873/6175/8667/6167/23057/5936/6176/6154/6157/6208/1819/6139/6165/6155/26986/6141/6230/6193/6207/10399/6206/51389/7311/6229/6133/10642/6138/6189/6142/6169/6222/6171/6210/6233/6144/6168/6…	1:CTB	4			Whole PE	hsa04612	Antigen processing and presentation	63	-0.410465	-1.50848	0.0107651	0.0464737	0.0313694	2860	tags=38%, list=21%, signal=30%	3118/4261/4802/4801/3119/7124/3305/3112/55080/972/3113/5721/5720/3108/3308/920/1520/3109/3303/3320/3326/3304/3310/3312	10:Monocyte	4			Whole PE	R-HSA-72689	Formation of a pool of free 40S subunits	93	-0.670367	-2.62109	1e-10	8.895e-09	7.76316e-09	2793	tags=70%, list=21%, signal=56%	6135/6137/7311/6138/6147/8664/6234/8667/6133/6143/6189/6201/6229/6222/6181/6202/11224/6165/6132/6235/6227/6156/6210/6130/27335/6141/4736/6230/6157/6142/6168/51386/6193/6167/3921/8663/6205/200916/8669/25873/9045/6208/6154/6161/6152/6207/6155/6125/23521/6146/6187/6224/6228/6159/9349/6218/6129/6136/6169/8665/10480/6164/6160/6124/3646	10:Monocyte	4
Whole PE	GO:0071219	cellular response to molecule of bacterial origin	171	0.392347	1.6747	0.000114612	0.0140799	0.0131081	3720	tags=35%, list=23%, signal=27%	2920/10221/949/27063/387/5595/2919/9516/7538/4282/2921/3297/51510/3576/9572/8140/5914/7474/153090/4793/706/2634/3661/2048/948/4067/3552/3394/196/59307/29126/9450/834/2635/8564/148022/3148/11213/7128/114769/942/7133/58509/23729/2950/445/22904/929/7494/54623/55829/3146/80380/207/388325/9646/57048/5970/1019/7001	1:CTB	4			Whole PE	hsa04612	Antigen processing and presentation	51	0.516849	1.95208	0.00029779	0.00478237	0.00333242	1068	tags=29%, list=8%, signal=27%	3304/3303/6890/3133/3106/3107/3115/3312/3320/1508/567/3824/1514/3105/3326	13:Fibroblast	4			Whole PE	R-HSA-156827	L13a-mediated translational silencing of Ceruloplasmin expression	102	-0.650731	-2.57779	1e-10	8.895e-09	7.76316e-09	2793	tags=66%, list=21%, signal=53%	6135/6137/7311/6138/6147/8664/6234/8667/6133/6143/6189/6201/6229/6222/6181/6202/11224/6165/6132/6235/6227/6156/6210/6130/27335/6141/4736/6230/6157/6142/6168/51386/6193/6167/3921/8663/6205/200916/8669/25873/9045/6208/6154/6161/6152/6207/1965/6155/6125/23521/6146/6187/6224/6228/6159/9349/6218/6129/6136/6169/1977/8665/10480/6164/6160/6124/3646	10:Monocyte	4
Whole PE	GO:0032543	mitochondrial translation	128	0.59615	2.45546	1e-10	1.0135e-07	9.43553e-08	4580	tags=69%, list=28%, signal=50%	219402/64981/122704/64960/79590/51318/64976/64928/51650/90480/6472/65005/26589/64969/51258/55168/51116/51253/60488/51642/219927/7818/65008/28998/64983/64432/28958/6182/78988/84300/54460/51649/116541/63931/64979/54516/51073/51081/64968/55052/56945/65003/51264/115416/79072/51021/708/28957/65993/116540/81554/51373/29093/3396/6183/10102/54948/124995/118487/51023/29088/64951/283459/57129/29074/84769/8…	1:CTB	3			Whole PE	hsa04612	Antigen processing and presentation	61	0.511824	1.89124	0.000159954	0.00335904	0.00274349	5595	tags=57%, list=34%, signal=38%	4801/567/3326/3310/3304/1508/10197/3320/972/5721/3306/3312/5720/3107/3123/8625/3115/3108/6892/3822/3821/821/5641/3122/3106/3309/3117/2923/3134/3119/7124/3109/920/3824/3105	1:CTB	4			Whole PE	R-HSA-72764	Eukaryotic Translation Termination	85	-0.657123	-2.5491	1e-10	8.895e-09	7.76316e-09	2793	tags=69%, list=21%, signal=55%	6135/6137/7311/6138/6147/6234/29104/6133/6143/6189/6201/6229/6222/6181/6202/11224/6165/6132/6235/6227/6156/327/6210/6130/6141/4736/6230/6157/6142/6168/6193/6167/3921/6205/200916/25873/9045/6208/6154/6161/6152/6207/6155/6125/23521/6146/6187/6224/6228/6159/9349/6218/6129/51504/6136/6169/6164/6160/6124	10:Monocyte	4
Whole PE	GO:0006119	oxidative phosphorylation	119	0.551056	2.24176	1.19615e-10	1.0776e-07	1.00323e-07	4574	tags=67%, list=28%, signal=49%	79085/515/387/55967/388753/4725/30968/6472/2395/84275/4718/4696/7388/790955/7381/10476/9551/51103/509/521/1340/84300/27069/4700/539/1347/51142/27089/54205/11315/514/51079/4712/4715/9377/4710/29103/4728/7415/10632/7385/4709/4731/1329/4697/1327/10975/29796/1350/65990/4704/983/637/4717/6392/4722/9167/400916/4720/4726/4706/4702/84277/4701/79736/1351/4695/1337/522/4708/513/4724/374291/4716/4707/4713/5…	1:CTB	3			Whole PE	hsa04612	Antigen processing and presentation	60	0.428259	1.81398	0.000118107	0.00340543	0.00256935	2214	tags=33%, list=14%, signal=29%	3123/4801/3310/3105/3326/3306/972/567/10197/3122/3304/3309/1508/5720/3117/3312/3320/3107/3135/3106	4:CTB-2	4			Whole PE	R-HSA-72706	GTP hydrolysis and joining of the 60S ribosomal subunit	103	-0.638821	-2.53942	1e-10	8.895e-09	7.76316e-09	2793	tags=65%, list=21%, signal=52%	6135/6137/7311/6138/6147/8664/6234/8667/6133/6143/6189/6201/6229/6222/6181/6202/11224/6165/6132/6235/6227/6156/6210/6130/27335/6141/4736/6230/6157/6142/6168/51386/6193/6167/3921/8663/6205/200916/8669/25873/9045/6208/6154/6161/6152/6207/1965/6155/6125/23521/6146/6187/6224/6228/6159/9349/6218/6129/6136/6169/1977/8665/10480/6164/6160/6124/3646	10:Monocyte	4
Whole PE	GO:0042273	ribosomal large subunit biogenesis	69	0.638764	2.38815	1.68828e-10	1.36886e-07	1.27439e-07	3597	tags=64%, list=22%, signal=50%	4809/55651/6128/23246/11224/26156/51491/6129/4869/51154/9045/51550/6125/6135/2971/6152/51187/54475/6147/6175/6154/6165/10412/6838/10969/6169/51388/55052/4736/55299/115416/23212/9875/54663/6130/3692/84231/55003/51121/84365/9326/56342/51018/4839	1:CTB	3			Whole PE	hsa03010	Ribosome	159	-0.620491	-2.6358	1e-10	3.54e-08	2.38947e-08	3356	tags=67%, list=25%, signal=51%	64432/29088/6209/57129/60488/55173/124995/122704/64960/9553/64969/6135/64978/6137/7311/51650/51373/51263/6138/6147/51253/6234/51073/6133/6143/6189/64949/6201/6229/6222/6181/6202/64979/84311/11224/6165/6132/6235/55052/65993/6227/79590/6156/6210/116541/6130/6141/4736/6230/6157/6142/28977/6168/6193/6167/92259/65080/3921/64975/9801/64983/28957/6205/200916/25873/9045/6208/6154/6161/6152/65005/6207/615…	10:Monocyte	3			Whole PE	R-HSA-9633012	Response of EIF2AK4 (GCN2) to amino acid deficiency	92	-0.64829	-2.5334	1e-10	8.895e-09	7.76316e-09	2793	tags=66%, list=21%, signal=53%	6135/6137/7311/6138/6147/6234/6133/6143/6189/6201/6229/6222/6181/6202/11224/6165/6132/6235/6227/6156/6210/6130/1054/6141/4736/6230/6157/6142/6168/6193/6167/3921/6205/200916/25873/9045/6208/6154/6161/6152/6207/1965/6155/6125/23521/467/6146/6187/6224/6228/6159/9349/6218/6129/6136/1649/6169/6164/6160/440275/6124	10:Monocyte	4
Whole PE	GO:0009206	purine ribonucleoside triphosphate biosynthetic process	94	0.560232	2.20112	5.96999e-09	4.40043e-06	4.09673e-06	4850	tags=69%, list=30%, signal=49%	527/283120/515/55967/4725/30968/4831/3615/4830/4718/4696/790955/10476/9551/2023/509/521/4700/539/514/51079/4712/4715/55811/4710/4728/516/7415/10632/4709/4731/3614/65990/518/4704/10891/4717/6392/226/4722/7040/4720/4726/4706/4702/84277/4701/4833/10201/4695/522/517/4708/513/4724/374291/1353/4716/4707/4713/4729/4711/506/4832/6390	1:CTB	3			Whole PE	hsa04145	Phagosome	126	0.417006	1.93744	1.60424e-06	0.000113581	7.6666e-05	1251	tags=29%, list=9%, signal=26%	1514/3688/3685/23480/3105/9146/4973/3107/84617/821/29927/533/51606/5879/55176/3133/3916/7097/10952/7099/203068/2204/90423/3106/811/3684/6890/10312/9296/200576/1535/3678/5878/2213/81035/9554	10:Monocyte	3			Whole PE	R-HSA-192823	Viral mRNA Translation	82	-0.652848	-2.51829	1e-10	8.895e-09	7.76316e-09	2793	tags=70%, list=21%, signal=56%	6135/6137/7311/6138/6147/6234/6133/6143/6189/6201/6229/6222/6181/6202/11224/6165/6132/6235/6227/6156/6210/6130/6141/4736/6230/6157/6142/6168/6193/6167/3921/6205/200916/25873/9045/6208/6154/6161/6152/6207/6155/6125/23521/6146/6187/6224/6228/6159/9349/6218/6129/6136/6169/6164/2926/6160/6124	10:Monocyte	4
Whole PE	GO:0046034	ATP metabolic process	114	0.530545	2.14334	9.17027e-09	6.19605e-06	5.76842e-06	4574	tags=63%, list=28%, signal=46%	527/283120/4907/515/26289/55967/4725/30968/3304/204/4718/4696/790955/114789/10476/9551/481/2023/509/706/521/4700/539/514/51079/572/4712/93974/4715/55811/4710/11164/4728/516/7415/10632/4709/29789/4731/3312/1497/65990/518/4704/10891/4717/6392/226/4722/7040/526/4720/4726/4706/4702/84277/4701/4695/522/517/4708/513/4724/374291/1353/4716/4707/4713/5169/5167/4729/4711	1:CTB	3			Whole PE	hsa05205	Proteoglycans in cancer	156	0.393518	1.91292	1.98087e-06	0.000116871	7.88872e-05	2032	tags=31%, list=15%, signal=26%	5291/967/960/1514/2885/3688/3685/2260/6655/6383/387/4193/5879/5603/9475/6237/7097/3845/10000/7099/7040/207/7042/867/6385/4233/6714/1499/7474/4060/5894/4659/5328/3678/8826/5605/6654/8321/5594/7482/3091/3082/3480/998/5962/1956/5829/4609	10:Monocyte	3			Whole PE	R-HSA-156902	Peptide chain elongation	82	-0.650541	-2.50939	1e-10	8.895e-09	7.76316e-09	2793	tags=68%, list=21%, signal=55%	6135/6137/7311/6138/6147/6234/6133/6143/6189/6201/6229/6222/6181/6202/11224/6165/6132/6235/6227/6156/6210/6130/6141/4736/6230/6157/6142/6168/6193/6167/3921/6205/200916/25873/9045/6208/6154/6161/6152/6207/6155/6125/23521/6146/6187/6224/6228/6159/9349/6218/6129/6136/6169/6164/6160/6124	10:Monocyte	4
Whole PE	GO:0033108	mitochondrial respiratory chain complex assembly	89	0.570588	2.23293	1.11904e-08	6.48086e-06	6.03358e-06	4431	tags=63%, list=27%, signal=46%	79064/91942/389203/55967/4725/51287/84275/4718/4696/790955/55744/51103/493753/84233/51295/284184/6341/617/28958/84300/84334/4700/9997/10063/5018/29078/131474/55101/51079/4712/100131801/4715/4710/79072/4728/4709/79145/6834/4704/4717/4722/4720/90871/4706/4702/4695/25880/51241/4708/4724/374291/4716/116228/4707/4713/54949	1:CTB	3			Whole PE	hsa00190	Oxidative phosphorylation	106	-0.476949	-1.93164	2.78236e-06	0.000140708	9.49769e-05	3129	tags=47%, list=23%, signal=37%	4708/4713/245973/516/4726/6391/525/1327/528/514/506/1355/5464/4701/4710/515/4725/526/498/27089/7381/4704/9551/1340/1350/522/29796/4717/4731/4723/10632/4706/126328/4712/4707/4705/521/64077/517/6390/4695/4722/1352/509/4711/4709/4696/4716/539/535	10:Monocyte	3			Whole PE	R-HSA-72613	Eukaryotic Translation Initiation	110	-0.621477	-2.49009	1e-10	8.895e-09	7.76316e-09	2793	tags=64%, list=21%, signal=51%	6135/6137/7311/6138/6147/8664/6234/8667/6133/6143/6189/6201/6229/6222/6181/6202/11224/6165/6132/6235/1967/6227/6156/6210/6130/27335/6141/4736/6230/6157/6142/6168/51386/6193/6167/3921/8663/6205/200916/8669/25873/9045/6208/6154/6161/6152/6207/1965/6155/6125/23521/6146/6187/6224/6228/6159/9349/6218/6129/6136/6169/1977/8665/10480/8892/6164/6160/1978/6124/3646	10:Monocyte	4
Whole PE	GO:0009145	purine nucleoside triphosphate biosynthetic process	95	0.552253	2.17455	1.48535e-08	8.02879e-06	7.47468e-06	4850	tags=68%, list=30%, signal=48%	527/283120/515/55967/4725/30968/4831/3615/4830/4718/4696/790955/10476/9551/2023/509/521/4700/539/514/51079/4712/4715/55811/4710/4728/516/7415/10632/4709/4731/3614/65990/518/4704/10891/4717/6392/226/4722/7040/4720/4726/4706/4702/84277/4701/4833/10201/4695/522/517/4708/513/4724/374291/1353/4716/4707/4713/4729/4711/506/4832/6390	1:CTB	3			Whole PE	hsa05200	Pathways in cancer	396	0.273306	1.48464	8.5631e-05	0.00159544	0.00107691	2311	tags=27%, list=17%, signal=23%	5291/5728/2885/3688/3685/3601/5337/2260/613/6655/387/9446/5732/1495/3454/1871/5900/4193/1902/5879/8772/5734/9475/5970/3569/5898/4259/3455/3845/10000/5331/7048/7423/4286/7040/7849/207/3915/7042/3576/3575/861/867/4233/4790/7184/1499/7474/3914/3716/8454/329/7170/5894/2768/2770/54331/23401/6500/5338/6777/4257/2057/119391/2113/4854/5605/2782/7175/6654/8321/6256/5594/1855/7482/3091/3082/675/7296/9170/3…	10:Monocyte	3			Whole PE	R-HSA-72737	Cap-dependent Translation Initiation	110	-0.621477	-2.49009	1e-10	8.895e-09	7.76316e-09	2793	tags=64%, list=21%, signal=51%	6135/6137/7311/6138/6147/8664/6234/8667/6133/6143/6189/6201/6229/6222/6181/6202/11224/6165/6132/6235/1967/6227/6156/6210/6130/27335/6141/4736/6230/6157/6142/6168/51386/6193/6167/3921/8663/6205/200916/8669/25873/9045/6208/6154/6161/6152/6207/1965/6155/6125/23521/6146/6187/6224/6228/6159/9349/6218/6129/6136/6169/1977/8665/10480/8892/6164/6160/1978/6124/3646	10:Monocyte	4
Whole PE	GO:0009144	purine nucleoside triphosphate metabolic process	143	0.501429	2.08851	1.89745e-08	9.61532e-06	8.95172e-06	4574	tags=58%, list=28%, signal=42%	527/283120/4907/515/26289/55967/4725/30968/4831/55270/5901/3615/3304/204/4830/4718/4696/790955/114789/10476/9551/481/100/2023/509/706/521/3704/4700/539/514/51079/572/9567/4712/93974/4715/55811/4710/11164/4728/516/7415/10632/4709/29789/4731/3312/1497/3614/65990/518/4704/10891/4717/6392/226/4722/7040/526/4720/4726/4706/4702/84277/4701/4833/10201/4695/522/517/4708/513/4724/374291/1353/4716/4707/4713…	1:CTB	3			Whole PE	hsa05171	Coronavirus disease - COVID-19	176	-0.389672	-1.68102	0.000127927	0.00188975	0.00127557	2905	tags=43%, list=21%, signal=34%	7450/7297/5295/6135/6137/7311/5582/6138/6147/5335/6234/6133/6143/6189/6201/7124/6229/6222/6181/834/6202/11224/6165/6132/6235/6227/6156/6210/6130/6141/4736/6230/6157/6142/5296/2162/6168/6193/5336/6167/3921/716/6205/200916/25873/9045/6208/6154/6161/6152/6207/6155/6773/6125/23521/6146/51187/6187/4600/6224/6774/6228/6159/9349/6218/6129/6136/6169/3725/6164/6160/51135/64135/2212/6124/115004	10:Monocyte	3			Whole PE	R-HSA-2408557	Selenocysteine synthesis	85	-0.641902	-2.49006	1e-10	8.895e-09	7.76316e-09	2793	tags=67%, list=21%, signal=54%	6135/6137/7311/6138/118672/6147/6234/6133/6143/6189/6201/6229/6222/6181/6202/11224/6165/6132/6235/6227/6156/6210/6130/6141/4736/6230/6157/6142/6168/6193/6167/3921/6205/200916/25873/9045/6208/6154/6161/6152/6207/6155/6125/23521/6146/6187/6224/6228/6159/9349/6218/6129/6136/6169/6164/6160/6124	10:Monocyte	4
Whole PE	GO:0009205	purine ribonucleoside triphosphate metabolic process	137	0.505406	2.09514	2.05631e-08	9.8074e-06	9.13054e-06	4940	tags=63%, list=30%, signal=44%	527/283120/4907/515/26289/55967/4725/30968/4831/5901/3615/3304/204/4830/4718/4696/790955/114789/10476/9551/481/2023/509/706/521/3704/4700/539/514/51079/572/9567/4712/93974/4715/55811/4710/11164/4728/516/7415/10632/4709/29789/4731/3312/1497/3614/65990/518/4704/10891/4717/6392/226/4722/7040/526/4720/4726/4706/4702/84277/4701/4833/10201/4695/522/517/4708/513/4724/374291/1353/4716/4707/4713/5169/5167…	1:CTB	3			Whole PE	hsa04550	Signaling pathways regulating pluripotency of stem cells	92	0.395176	1.76188	0.000241372	0.00273392	0.00184537	2032	tags=30%, list=15%, signal=26%	5291/3720/2885/2260/5978/5603/9869/92/3845/10000/3398/207/1499/7474/3716/5894/659/6929/5605/8321/5594/1855/7482/10336/3480/4089/1857/4609	10:Monocyte	3			Whole PE	R-HSA-156842	Eukaryotic Translation Elongation	85	-0.633305	-2.45671	1e-10	8.895e-09	7.76316e-09	2793	tags=66%, list=21%, signal=53%	6135/6137/7311/6138/6147/6234/6133/6143/6189/6201/6229/6222/6181/6202/11224/6165/6132/6235/6227/6156/6210/6130/6141/4736/6230/6157/6142/6168/6193/6167/3921/6205/200916/25873/9045/6208/6154/6161/6152/6207/6155/6125/23521/6146/6187/6224/6228/6159/9349/6218/6129/6136/6169/6164/6160/6124	10:Monocyte	4
Whole PE	GO:0009201	ribonucleoside triphosphate biosynthetic process	99	0.53612	2.1154	4.36503e-08	1.9662e-05	1.83051e-05	4850	tags=68%, list=30%, signal=48%	527/283120/515/55967/4725/30968/4831/3615/4830/4718/4696/790955/10476/9551/2023/509/521/4700/539/514/51079/4712/4715/55811/4710/4728/516/7415/10632/4709/4731/3614/65990/518/4704/10891/4717/6392/226/790/4722/7040/4720/54963/4726/4706/4702/84277/4701/4833/10201/4695/522/517/4708/513/4724/374291/1353/4716/4707/4713/4729/4711/506/4832/6390	1:CTB	3			Whole PE	hsa05226	Gastric cancer	101	0.333002	1.51177	0.00347813	0.0188178	0.0127019	2032	tags=29%, list=15%, signal=25%	5291/2885/6655/1495/1871/3845/10000/7048/7040/207/7042/4233/1499/7474/5894/23401/5605/6654/8321/6256/5594/1855/7482/3082/4089/6464/1857/1956/4609	10:Monocyte	3			Whole PE	R-HSA-975956	Nonsense Mediated Decay (NMD) independent of the Exon Junction Complex (EJC)	87	-0.626927	-2.43463	1e-10	8.895e-09	7.76316e-09	2793	tags=64%, list=21%, signal=51%	6135/6137/7311/6138/6147/6234/6133/6143/6189/6201/6229/6222/6181/6202/11224/6165/6132/6235/6227/6156/6210/6130/6141/4736/6230/6157/6142/6168/6193/6167/3921/6205/200916/25873/9045/6208/6154/6161/6152/6207/6155/6125/23521/6146/6187/6224/6228/6159/9349/6218/6129/6136/6169/6164/6160/6124	10:Monocyte	4
Whole PE	GO:0015986	proton motive force-driven ATP synthesis	62	0.613023	2.22829	6.0797e-08	2.42864e-05	2.26102e-05	4676	tags=77%, list=29%, signal=55%	527/515/55967/4725/30968/4718/4696/10476/9551/509/521/4700/539/514/51079/4712/4715/4710/4728/516/10632/4709/4731/65990/518/4704/4717/6392/4722/4720/4726/4706/4702/84277/4701/4695/522/517/4708/513/4724/374291/4716/4707/4713/4729/4711/506	1:CTB	3			Whole PE	hsa04360	Axon guidance	134	0.316684	1.49114	0.0035918	0.0189776	0.0128097	1622	tags=22%, list=12%, signal=19%	5291/54434/3688/387/5879/57522/9475/23654/6237/10512/3845/8440/3611/2048/4233/6714/10298/7474/5530/5894/103910/5533/2770/10501/659/6259/1946/10507/5594	10:Monocyte	3			Whole PE	R-HSA-927802	Nonsense-Mediated Decay (NMD)	106	-0.604574	-2.41686	1e-10	8.895e-09	7.76316e-09	2793	tags=58%, list=21%, signal=46%	6135/6137/7311/6138/6147/6234/6133/6143/6189/6201/6229/6222/6181/6202/11224/6165/6132/6235/6227/6156/6210/6130/6141/4736/4116/6230/6157/6142/6168/6193/6167/3921/6205/200916/25873/9045/6208/6154/6161/6152/6207/6155/6125/23521/6146/6187/6224/6228/6159/9349/6218/6129/6136/6169/6164/6160/65110/5520/9775/6124/55110	10:Monocyte	4
Whole PE	GO:0006754	ATP biosynthetic process	84	0.560858	2.16555	6.29026e-08	2.42864e-05	2.26102e-05	4676	tags=68%, list=29%, signal=49%	527/283120/515/55967/4725/30968/4718/4696/790955/10476/9551/2023/509/521/4700/539/514/51079/4712/4715/55811/4710/4728/516/7415/10632/4709/4731/65990/518/4704/10891/4717/6392/226/4722/7040/4720/4726/4706/4702/84277/4701/4695/522/517/4708/513/4724/374291/1353/4716/4707/4713/4729/4711/506	1:CTB	3			Whole PE	hsa05225	Hepatocellular carcinoma	134	0.298367	1.40489	0.00889813	0.0393742	0.0265773	2184	tags=30%, list=16%, signal=25%	5291/5728/2885/6655/9446/1871/4259/3845/10000/7048/7040/207/7042/4233/1499/7474/5894/23401/6598/4257/6601/119391/5605/6654/8321/5594/1855/7482/3082/7296/3480/4089/9817/6464/1857/1956/4609/29117/578/1019	10:Monocyte	3			Whole PE	R-HSA-975957	Nonsense Mediated Decay (NMD) enhanced by the Exon Junction Complex (EJC)	106	-0.604574	-2.41686	1e-10	8.895e-09	7.76316e-09	2793	tags=58%, list=21%, signal=46%	6135/6137/7311/6138/6147/6234/6133/6143/6189/6201/6229/6222/6181/6202/11224/6165/6132/6235/6227/6156/6210/6130/6141/4736/4116/6230/6157/6142/6168/6193/6167/3921/6205/200916/25873/9045/6208/6154/6161/6152/6207/6155/6125/23521/6146/6187/6224/6228/6159/9349/6218/6129/6136/6169/6164/6160/65110/5520/9775/6124/55110	10:Monocyte	4
Whole PE	GO:0042773	ATP synthesis coupled electron transport	81	0.556251	2.13856	7.86917e-08	2.77405e-05	2.5826e-05	4574	tags=70%, list=28%, signal=51%	55967/388753/4725/4718/4696/7388/790955/7381/51103/1340/27069/4700/1347/51142/27089/54205/11315/4712/4715/9377/4710/29103/4728/7385/4709/4731/1329/4697/1327/10975/29796/1350/4704/983/637/4717/6392/4722/9167/4720/4726/4706/4702/4701/1351/4695/1337/4708/4724/374291/4716/4707/4713/54949/1345/4729/4711	1:CTB	3			Whole PE	hsa05171	Coronavirus disease - COVID-19	168	0.487846	2.1881	1.65123e-10	5.86185e-08	4.08461e-08	3302	tags=53%, list=25%, signal=40%	9636/715/716/4600/51065/7187/8829/4599/4938/3576/10379/4792/6773/6772/51187/25873/6231/1956/1675/3725/6223/4790/200916/115004/4939/5610/6203/6136/5291/3455/6135/834/6158/6142/6209/6347/6165/6166/6171/3627/718/717/6210/6206/2162/6868/6139/2353/728/6129/7124/7311/3661/4736/2197/6143/64135/6227/6137/7297/6167/6154/6232/5970/6128/727/7099/103/6774/6161/6130/3570/6156/6194/629/51121/6234/6144/4940/620…	13:Fibroblast	3			Whole PE	R-HSA-2408522	Selenoamino acid metabolism	97	-0.603048	-2.37087	1e-10	8.895e-09	7.76316e-09	2793	tags=61%, list=21%, signal=49%	6135/6137/7311/191/6138/118672/6147/3176/6234/6133/6143/6189/6201/6229/6222/6181/6202/11224/6165/6132/6235/6227/6156/6210/6130/6141/4736/6230/6157/6142/6168/6193/6167/3921/6205/200916/25873/9045/6208/6154/6161/6152/6207/6155/6125/23521/6146/6187/6224/6228/6159/9349/6218/6129/6136/6169/6164/6160/6124	10:Monocyte	4
Whole PE	GO:0042775	mitochondrial ATP synthesis coupled electron transport	81	0.556251	2.13856	7.86917e-08	2.77405e-05	2.5826e-05	4574	tags=70%, list=28%, signal=51%	55967/388753/4725/4718/4696/7388/790955/7381/51103/1340/27069/4700/1347/51142/27089/54205/11315/4712/4715/9377/4710/29103/4728/7385/4709/4731/1329/4697/1327/10975/29796/1350/4704/983/637/4717/6392/4722/9167/4720/4726/4706/4702/4701/1351/4695/1337/4708/4724/374291/4716/4707/4713/54949/1345/4729/4711	1:CTB	3			Whole PE	hsa04550	Signaling pathways regulating pluripotency of stem cells	103	-0.47973	-1.79335	6.20393e-05	0.00183533	0.00127888	2728	tags=38%, list=21%, signal=30%	84108/91/4086/5594/8324/4087/10000/3265/7474/7482/3480/5295/2261/324/4089/5894/659/10336/5978/207/657/208/4093/3397/8321/1857/3399/3400/8313/3717/5290/4090/7475/4211/3572/84333/463/89780/7472	13:Fibroblast	3			Whole PE	R-HSA-72695	Formation of the ternary complex, and subsequently, the 43S complex	47	-0.645206	-2.26939	6.78818e-08	3.89554e-06	3.39985e-06	2389	tags=62%, list=18%, signal=51%	8664/6234/8667/6189/6201/6229/6222/6202/6235/6227/6210/27335/6230/51386/6193/3921/8663/6205/8669/6208/6207/1965/6187/6224/6228/6218/8665/10480/3646	10:Monocyte	4
Whole PE	GO:0051604	protein maturation	456	0.358968	1.6742	9.46785e-08	3.07061e-05	2.85869e-05	3454	tags=33%, list=21%, signal=27%	7265/3315/8728/1201/567/23478/5478/3326/1191/1522/25764/10856/1803/51647/3310/6767/10539/27348/30968/1725/3304/9531/284106/1155/29100/11236/2288/55848/131118/80273/2395/83475/5204/2934/649/578/1676/10450/23770/4880/3301/2023/6903/10491/53938/8772/10465/3320/134218/728489/8570/6904/10471/6950/972/64772/10049/908/9049/10726/5203/9935/8996/10728/10694/101/10730/81619/3337/3336/388962/2280/131474/572…	1:CTB	3			Whole PE	hsa04360	Axon guidance	151	-0.421908	-1.65561	0.000106514	0.00236327	0.00164676	2611	tags=35%, list=20%, signal=28%	5727/5594/5921/10398/2047/3265/84612/25/5170/103910/7474/4690/7852/6259/7222/55740/59277/5295/7220/10298/6237/8633/5894/659/5532/6093/817/10509/5747/10627/6092/1073/9353/54910/3611/1946/5362/4776/9037/5534/56288/2770/23365/6586/10371/5290/9475/84552/2042/80031/54437/8440/7225	13:Fibroblast	3			Whole PE	R-HSA-72649	Translation initiation complex formation	54	-0.613256	-2.21177	2.39549e-07	1.27939e-05	1.11659e-05	2389	tags=56%, list=18%, signal=46%	8664/6234/8667/6189/6201/6229/6222/6202/6235/6227/6210/27335/6230/51386/6193/3921/8663/6205/8669/6208/6207/1965/6187/6224/6228/6218/1977/8665/10480/3646	10:Monocyte	4
Whole PE	GO:0009199	ribonucleoside triphosphate metabolic process	143	0.478469	1.99288	2.4502e-07	7.35786e-05	6.85005e-05	4574	tags=58%, list=28%, signal=42%	527/283120/4907/515/26289/55967/4725/30968/4831/5901/3615/3304/204/4830/4718/4696/790955/114789/10476/9551/481/2023/509/706/521/3704/4700/539/514/51079/572/9567/4712/93974/4715/55811/4710/11164/4728/516/7415/10632/4709/29789/4731/3312/1497/3614/65990/518/4704/10891/4717/6392/226/790/4722/7040/526/4720/54963/4726/4706/4702/84277/4701/4833/10201/4695/522/517/4708/513/4724/374291/1353/4716/4707/4713…	1:CTB	3			Whole PE	hsa05200	Pathways in cancer	412	-0.341685	-1.47956	0.00035613	0.00478237	0.00333242	1476	tags=20%, list=11%, signal=18%	10235/355/5567/7188/5728/805/2100/2767/4089/23493/2475/1909/5894/1612/6667/7704/3065/6775/6093/817/2792/5747/207/6502/6934/5599/4853/208/2034/2064/51684/1284/7046/51176/862/8321/3481/1857/115/3675/1282/6655/7042/2737/3082/3912/4258/894/2770/23365/1902/8313/5602/3717/4437/27436/4040/5228/5290/10912/6654/7475/9475/26508/3572/3910/7175/109/182/89780/1021/4854/29119/185/111/10319/3908/7472/23236/3915…	13:Fibroblast	3			Whole PE	R-HSA-72702	Ribosomal scanning and start codon recognition	54	-0.605096	-2.18234	4.69501e-07	2.34345e-05	2.04526e-05	2389	tags=56%, list=18%, signal=46%	8664/6234/8667/6189/6201/6229/6222/6202/6235/6227/6210/27335/6230/51386/6193/3921/8663/6205/8669/6208/6207/1965/6187/6224/6228/6218/1977/8665/10480/3646	10:Monocyte	4
Whole PE	GO:0042776	proton motive force-driven mitochondrial ATP synthesis	55	0.609891	2.18841	5.00611e-07	0.000139964	0.000130304	4850	tags=82%, list=30%, signal=58%	515/55967/4725/30968/4718/4696/10476/9551/509/521/4700/539/514/51079/4712/4715/4710/4728/10632/4709/4731/65990/4704/4717/6392/4722/4720/4726/4706/4702/84277/4701/4695/522/4708/513/4724/374291/4716/4707/4713/4729/4711/506/6390	1:CTB	3			Whole PE	hsa05205	Proteoglycans in cancer	169	-0.400288	-1.59842	0.000469565	0.00505138	0.00351986	2544	tags=37%, list=20%, signal=30%	5594/7057/1277/8324/4087/10000/3265/5170/7474/1278/5566/5962/7482/54776/1655/3480/857/3316/5295/60/355/5567/117581/6237/2475/5894/6093/817/5747/207/7410/208/84309/10818/858/2064/3708/27250/8321/3481/6655/2549/7042/3082/3059/23365/5290/4659/6654/7448/7475/29102/9475/6383/51196/60495/3709/288/4660/7430/89780/7472	13:Fibroblast	3			Whole PE	R-HSA-1799339	SRP-dependent cotranslational protein targeting to membrane	104	-0.500941	-1.99736	8.59109e-07	4.02198e-05	3.51021e-05	2793	tags=56%, list=21%, signal=45%	6135/6137/7311/6138/6147/6729/6234/6133/6143/6189/6201/6229/6222/6181/6202/11224/6165/6132/6235/6227/6156/6210/6130/6141/4736/6230/6157/6142/6168/6193/6167/3921/28972/6205/200916/25873/9045/6208/6154/6161/6152/6207/6155/6125/23521/6146/6187/6224/6228/6159/9349/6218/6129/6136/6169/6164/6160/6124	10:Monocyte	4
Whole PE	GO:0009141	nucleoside triphosphate metabolic process	158	0.451958	1.90951	1.33495e-06	0.000338243	0.000314899	4356	tags=54%, list=27%, signal=40%	527/283120/4907/515/26289/55967/4725/30968/4831/55270/5901/3615/3304/204/4830/4718/4696/790955/114789/10476/9551/481/100/2023/509/706/521/3704/4700/539/1854/514/51079/572/9567/79077/4712/93974/4715/55811/4710/11164/4728/516/7415/10632/4709/29789/4731/3312/1497/3614/65990/518/4704/10891/4717/6392/226/790/4722/7040/526/4720/54963/4726/4706/4702/84277/4701/4833/10201/4695/522/517/4708/9519/513/4724/…	1:CTB	3			Whole PE	hsa04145	Phagosome	111	0.370572	1.5692	0.00116256	0.010676	0.00743918	2614	tags=31%, list=20%, signal=25%	7058/715/3693/9296/3678/6890/84790/3133/3106/3107/3115/1514/3105/10383/8992/29927/9902/949/23480/527/7059/718/7277/10952/1535/3685/3673/51382/203068/7879/526/81035/155066/7099	13:Fibroblast	3			Whole PE	R-HSA-9754678	SARS-CoV-2 modulates host translation machinery	47	-0.567468	-1.99596	3.07722e-05	0.00111722	0.000975059	3780	tags=66%, list=28%, signal=48%	6223/25929/6188/6206/6209/6632/6606/6634/79760/6234/6189/6201/6229/6222/6202/6235/6227/6210/6230/6193/3921/6635/6205/6208/6207/6187/6224/6228/6218/6636/6637	10:Monocyte	4
Whole PE	GO:0009142	nucleoside triphosphate biosynthetic process	107	0.4898	1.95958	1.95873e-06	0.0004671	0.000434863	4900	tags=64%, list=30%, signal=45%	527/283120/515/55967/4725/30968/4831/3615/4830/4718/4696/790955/10476/9551/2023/509/521/4700/539/514/51079/4712/4715/55811/4710/4728/516/7415/10632/4709/4731/3614/65990/518/4704/10891/4717/6392/226/790/4722/7040/4720/54963/4726/4706/4702/84277/4701/4833/10201/4695/522/517/4708/9519/513/4724/374291/1353/4716/4707/4713/4729/4711/506/4832/6390/203	1:CTB	3			Whole PE	hsa05225	Hepatocellular carcinoma	140	-0.409781	-1.59817	0.00147943	0.0125047	0.00871342	2544	tags=35%, list=20%, signal=28%	5594/2947/8324/7296/4087/10000/3265/7474/55193/86/7482/51426/3480/5295/324/60/5728/4089/6601/2475/5894/57492/29117/6597/207/6934/208/25759/7046/51176/8321/3481/1857/6655/2549/7042/3082/4258/8313/4040/5290/6604/10912/6654/7475/89780/1021/7472/7043	13:Fibroblast	3			Whole PE	R-HSA-9735869	SARS-CoV-1 modulates host translation machinery	34	-0.605414	-1.98856	6.41965e-05	0.00211492	0.00184581	2308	tags=79%, list=17%, signal=66%	6217/6203/6233/6223/6188/6206/6209/6234/3178/6189/6201/6229/6222/6202/6235/6227/6210/6230/6193/3921/6205/6208/6207/6187/6224/6228/6218	10:Monocyte	4
Whole PE	GO:0019646	aerobic electron transport chain	74	0.536477	2.02266	2.93284e-06	0.000679413	0.000632523	4574	tags=69%, list=28%, signal=50%	4725/4718/4696/7388/790955/7381/51103/1340/4700/1347/27089/54205/11315/4712/4715/9377/4710/29103/4728/7385/4709/4731/1329/4697/1327/10975/29796/1350/4704/4717/6392/4722/9167/4720/4726/4706/4702/4701/1351/4695/1337/4708/4724/374291/4716/4707/4713/54949/1345/4729/4711	1:CTB	3			Whole PE	hsa05226	Gastric cancer	109	-0.437158	-1.64811	0.00163543	0.0131949	0.00919439	2544	tags=34%, list=20%, signal=28%	5594/8324/4087/5915/10000/3265/7474/7482/51426/5295/324/4089/2475/5894/207/6934/208/2064/25759/7046/51176/8321/1857/6655/2549/7042/3082/8313/4040/5290/10912/6654/7475/89780/29119/7472/7043	13:Fibroblast	3			Whole PE	R-HSA-1799339	SRP-dependent cotranslational protein targeting to membrane	104	0.559616	2.37141	2.34721e-10	2.08081e-07	1.84318e-07	3302	tags=54%, list=25%, signal=41%	51065/6747/90701/23478/116832/25873/6231/6223/200916/29927/6203/6136/6135/23480/6158/6142/6209/6165/6166/6171/6727/6210/6206/6745/6139/10952/6129/28972/7311/6728/4736/2197/6143/6227/6137/6167/6154/6232/6730/6128/6161/6130/6156/6194/51121/6234/6144/6205/11224/6132/6235/6222/6204/6207/6229/6146	13:Fibroblast	4
Whole PE	GO:0061077	chaperone-mediated protein folding	68	0.551946	2.05082	3.20815e-06	0.000703018	0.000654499	3446	tags=56%, list=21%, signal=44%	3315/1191/3310/6767/27348/3304/2288/5204/1676/10491/10471/6950/972/10049/908/5203/10728/10694/3337/3336/573/9141/7203/5481/3306/5202/5479/27433/10131/30001/3312/79031/2286/10576/1861/10808/3313/23753	1:CTB	3			Whole PE	hsa03010	Ribosome	159	0.320755	1.43181	0.00527051	0.026729	0.0186251	3719	tags=43%, list=29%, signal=31%	51065/26589/116541/51187/25873/6231/6223/64951/200916/51642/6203/51650/64960/6136/6135/6158/6142/6209/6165/6166/6150/6171/64432/6183/6210/6206/6139/63875/6129/7311/4736/2197/51264/6143/6227/6137/6167/6154/6232/10399/6128/6161/84311/6130/6156/6194/51121/6234/6144/6205/11224/7818/6132/64928/6235/6222/6204/6207/6229/6146/6141/6181/55052/6193/51263/128308/100529239/65080/64976	13:Fibroblast	3			Whole PE	R-HSA-156842	Eukaryotic Translation Elongation	85	0.589572	2.40895	3.63087e-10	2.14584e-07	1.90079e-07	4064	tags=68%, list=31%, signal=47%	51065/116832/25873/6231/6223/200916/1936/6203/1938/6136/6135/6158/6142/6209/6165/6166/6171/6210/6206/6139/6129/7311/4736/2197/6143/6227/6137/6167/6154/6232/6128/1933/6161/6130/6156/6194/1937/51121/6234/6144/6205/11224/6132/6235/6222/6204/6207/6229/6146/6141/6181/6193/6138/6176/9045/6230/6202/6164	13:Fibroblast	4
Whole PE	GO:0010257	NADH dehydrogenase complex assembly	52	0.591352	2.10553	4.61004e-06	0.000934455	0.000869963	4354	tags=69%, list=27%, signal=51%	91942/55967/4725/4718/4696/55744/51103/84233/51295/284184/617/4700/5018/29078/55101/51079/4712/4715/4710/4728/4709/4704/4717/4722/4720/90871/4706/4702/4695/25880/4708/4724/374291/4716/4707/4713	1:CTB	3			Whole PE	hsa03010	Ribosome	160	0.736079	3.11642	1e-10	5.95e-09	4.85965e-09	3323	tags=82%, list=20%, signal=66%	6224/23521/6124/9349/6218/6128/64981/6160/6181/200916/122704/6194/6205/11224/64960/6129/79590/6143/51318/9045/6209/6158/64976/6217/6132/6125/6161/64928/6135/51650/65005/26589/64969/51258/55168/6152/6146/6123/51116/51187/6159/51253/6202/6203/6137/6147/25873/6175/60488/6167/51642/6176/219927/6154/6157/6208/6139/7818/6165/65008/28998/64983/64432/6182/6155/6141/6230/6193/54460/51649/6207/10399/116541…	1:CTB	3			Whole PE	R-HSA-72689	Formation of a pool of free 40S subunits	93	0.566696	2.34662	8.09158e-10	3.58659e-07	3.17701e-07	3302	tags=56%, list=25%, signal=42%	51065/116832/25873/6231/6223/8666/200916/6203/6136/6135/27335/6158/6142/6209/6165/6166/51386/6171/6210/6206/8663/6139/6129/7311/4736/2197/6143/6227/6137/8662/6167/6154/6232/6128/6161/6130/6156/6194/51121/6234/6144/6205/11224/8664/8668/6132/6235/6222/6204/6207/6229/6146	13:Fibroblast	4
Whole PE	GO:0032981	mitochondrial respiratory chain complex I assembly	52	0.591352	2.10553	4.61004e-06	0.000934455	0.000869963	4354	tags=69%, list=27%, signal=51%	91942/55967/4725/4718/4696/55744/51103/84233/51295/284184/617/4700/5018/29078/55101/51079/4712/4715/4710/4728/4709/4704/4717/4722/4720/90871/4706/4702/4695/25880/4708/4724/374291/4716/4707/4713	1:CTB	3			Whole PE	hsa00190	Oxidative phosphorylation	110	0.567227	2.2822	1e-10	5.95e-09	4.85965e-09	4931	tags=75%, list=30%, signal=52%	527/5464/515/55967/4725/4718/4696/7388/7381/10476/9551/509/521/50617/1340/8992/9550/4700/539/1347/27089/54205/10063/514/51079/4712/529/4715/9377/4710/51382/4728/516/90423/10632/7385/4709/4731/1329/4697/1327/9296/10975/29796/1350/518/4704/4717/6392/4722/9167/526/4720/4726/4706/533/4702/4701/1351/4695/535/1337/522/517/4708/513/4724/374291/1353/4716/534/4707/479/4713/1345/4729/4711/506/9114/6390/569…	1:CTB	3			Whole PE	R-HSA-9633012	Response of EIF2AK4 (GCN2) to amino acid deficiency	92	0.558966	2.31307	1.27005e-09	4.50361e-07	3.98931e-07	4089	tags=65%, list=31%, signal=45%	51065/467/1051/116832/25873/6231/6223/200916/6203/1649/6136/6135/6158/6142/6209/6165/6166/6171/6210/6206/468/6139/6129/7311/4736/2197/6143/6227/6137/6167/6154/6232/6128/6161/6130/6156/6194/51121/6234/6144/6205/11224/6132/6235/6222/6204/6207/6229/6146/6141/6181/57761/6193/6138/6176/9045/6230/6202/6164/1054	13:Fibroblast	4
Whole PE	GO:0018105	peptidyl-serine phosphorylation	245	-0.345907	-1.69503	7.26152e-06	0.00136922	0.00127472	3198	tags=35%, list=20%, signal=28%	53904/22943/817/596/89780/127933/7046/284/7048/4139/5894/3551/11137/64324/5562/2872/23049/9770/6198/9647/117854/8550/8569/6732/11329/2932/4909/5217/28996/1859/5591/4294/9252/9451/29110/253260/5170/57521/9475/1956/2475/79109/545/9113/11011/351/1452/51719/53944/4092/6622/9149/1389/6093/627/1017/5599/1147/4140/8317/96459/493/8440/6789/472/5586/23012/51701/200576/5290/26524/10142/6733/5567/7037/85440…	1:CTB	3			Whole PE	hsa05171	Coronavirus disease - COVID-19	184	0.52407	2.24842	1e-10	5.95e-09	4.85965e-09	3172	tags=49%, list=19%, signal=40%	6224/23521/6124/9349/6218/6128/6160/6181/200916/6194/7132/6205/11224/5595/6129/9636/6143/9045/6209/6158/6217/6132/6125/6161/2353/6135/6152/6146/6123/3576/51187/6159/6202/6203/6137/6147/25873/6175/4793/6167/3661/6176/6154/6157/6208/6139/6165/6774/57506/6155/6141/6230/6193/6207/6206/7311/6229/6133/6138/6189/6142/6169/6222/6171/834/6210/6233/6144/6168/6188/4736/6228/5603/6201/6122/6227/6130/115004/6…	1:CTB	3			Whole PE	R-HSA-156902	Peptide chain elongation	82	0.584045	2.38138	3.31981e-09	9.81005e-07	8.68976e-07	4064	tags=67%, list=31%, signal=46%	51065/116832/25873/6231/6223/200916/6203/1938/6136/6135/6158/6142/6209/6165/6166/6171/6210/6206/6139/6129/7311/4736/2197/6143/6227/6137/6167/6154/6232/6128/6161/6130/6156/6194/51121/6234/6144/6205/11224/6132/6235/6222/6204/6207/6229/6146/6141/6181/6193/6138/6176/9045/6230/6202/6164	13:Fibroblast	4
Whole PE	GO:0006120	mitochondrial electron transport, NADH to ubiquinone	41	0.611564	2.0618	2.08617e-05	0.00345198	0.00321374	4574	tags=76%, list=28%, signal=55%	4725/4718/4696/51103/4700/11315/4712/4715/4710/29103/4728/4709/4731/4697/4704/4717/4722/4720/4726/4706/4702/4701/4695/4708/4724/374291/4716/4707/4713/4729/4711	1:CTB	3			Whole PE	hsa00190	Oxidative phosphorylation	110	0.485757	2.3395	1.29757e-10	4.4896e-08	3.38735e-08	2607	tags=45%, list=17%, signal=38%	4725/50617/527/515/7388/27089/5464/9377/4696/55967/10476/4718/7381/10975/51079/10312/539/4710/9551/514/509/533/4711/8992/4700/1347/9296/4695/534/1337/1340/4712/54205/529/1329/10632/90423/4709/4704/4722/4715/4714/521/4728/4707/1353/9550/522/525/4731	4:CTB-2	3			Whole PE	R-HSA-72764	Eukaryotic Translation Termination	85	0.552483	2.25741	1.83634e-08	4.06979e-06	3.60503e-06	4064	tags=67%, list=31%, signal=46%	51065/116832/25873/6231/6223/200916/6203/6136/6135/6158/6142/6209/6165/6166/6171/6210/6206/51504/6139/6129/7311/2935/4736/2197/6143/6227/6137/6167/6154/6232/6128/6161/6130/6156/2107/6194/51121/6234/6144/6205/11224/6132/6235/6222/6204/6207/6229/6146/6141/6181/6193/6138/6176/9045/6230/6202/6164	13:Fibroblast	4
Whole PE	GO:0002685	regulation of leukocyte migration	187	0.392136	1.69163	5.62577e-05	0.00800242	0.00745013	4738	tags=41%, list=29%, signal=29%	5879/301/1265/1588/5228/2150/6846/387/5595/430/1803/4282/3162/7784/9466/3958/3576/9750/5025/7422/3383/100/5764/1230/7474/6352/1843/8772/1652/51561/80024/3204/972/5881/58515/4067/5919/3554/3552/101/6793/2650/6375/83700/708/57402/284114/9435/11035/146433/3146/27342/207/8174/3673/11151/11240/8784/3690/63940/1399/1906/613/6348/7057/5641/347/5880/3071/22914/928/5054/1236/5734/1893/199	1:CTB	3			Whole PE	hsa04145	Phagosome	124	0.325239	1.67401	0.000101066	0.00329682	0.00248741	2760	tags=35%, list=18%, signal=29%	3123/50617/527/3105/3678/7280/5878/3122/11151/7277/3689/7879/10312/4842/533/3117/83547/5879/8992/9296/4360/949/534/338382/529/2214/10381/7846/90423/9146/10383/2212/23480/3107/3135/3106/5869/29927/929/9550/525/1535/51807/4688	4:CTB-2	3			Whole PE	R-HSA-192823	Viral mRNA Translation	82	0.560089	2.2837	4.09784e-08	7.26548e-06	6.43577e-06	4064	tags=66%, list=31%, signal=46%	51065/116832/25873/6231/6223/200916/6203/6136/6135/6158/6142/6209/6165/6166/6171/6210/6206/6139/6129/7311/4736/2197/6143/6227/6137/6167/6154/6232/6128/6161/6130/6156/6194/51121/6234/6144/6205/11224/6132/6235/6222/6204/6207/6229/6146/6141/6181/6193/6138/6176/9045/6230/6202/6164	13:Fibroblast	4
Whole PE	GO:0000027	ribosomal large subunit assembly	23	0.661505	1.93651	9.26018e-05	0.0121099	0.0112742	3597	tags=70%, list=22%, signal=54%	6128/23246/51154/6125/6135/6152/54475/6147/6175/6169/55052/55299/23212/84231/56342/4839	1:CTB	3			Whole PE	hsa04550	Signaling pathways regulating pluripotency of stem cells	112	-0.495575	-1.59616	0.000182805	0.00486542	0.00367089	3103	tags=43%, list=20%, signal=35%	7482/7483/4093/4893/84108/7476/2885/92/7473/89780/84333/1857/4086/3265/2263/8321/3480/10000/5594/4090/5291/9869/93/463/648/8313/324/5295/2247/3717/1432/2932/5290/3572/4211/3400/4087/5894/1499/657/3845/7994/8323/7475/4089/55183/56916/658	4:CTB-2	3			Whole PE	R-HSA-156827	L13a-mediated translational silencing of Ceruloplasmin expression	102	0.506259	2.13293	7.61151e-08	1.22684e-05	1.08673e-05	3302	tags=52%, list=25%, signal=39%	51065/116832/25873/6231/6223/8666/200916/26986/6203/6136/6135/27335/6158/6142/6209/6165/6166/51386/6171/6210/6206/8663/6139/6129/7311/4736/2197/6143/6227/6137/8662/6167/6154/6232/6128/6161/6130/6156/6194/51121/6234/6144/6205/11224/8664/8668/6132/6235/6222/6204/6207/6229/6146	13:Fibroblast	4
Whole PE	GO:0071222	cellular response to lipopolysaccharide	166	0.391771	1.66975	0.000148053	0.0171487	0.0159652	3720	tags=36%, list=23%, signal=28%	2920/10221/949/27063/387/5595/2919/9516/7538/4282/2921/3297/51510/3576/9572/8140/5914/7474/153090/4793/706/2634/3661/2048/948/4067/3552/3394/59307/29126/9450/834/2635/8564/148022/3148/11213/7128/114769/942/7133/58509/23729/2950/445/22904/929/7494/54623/55829/3146/80380/207/388325/9646/57048/5970/1019/7001	1:CTB	3			Whole PE	hsa05205	Proteoglycans in cancer	173	-0.456194	-1.50683	0.000267116	0.00660157	0.0049808	4199	tags=44%, list=27%, signal=32%	7482/4060/7483/6199/4893/2335/5962/6198/7476/2885/5579/3059/5829/51196/2017/5170/22800/7409/29102/7124/7473/89780/5501/2475/3265/8321/3480/10000/5335/5594/5291/22808/355/673/8826/1514/5781/858/5295/1655/2099/6093/2549/5500/2247/3091/288/1432/7074/5290/6383/23365/836/1026/10451/818/6654/1956/4087/4659/4233/5727/5894/2066/1499/3845/8323/9475/7475/5747/5567/3688/10818/867/5336/4660	4:CTB-2	3			Whole PE	R-HSA-975956	Nonsense Mediated Decay (NMD) independent of the Exon Junction Complex (EJC)	87	0.521881	2.13883	1.2144e-07	1.79428e-05	1.58937e-05	4064	tags=66%, list=31%, signal=45%	51065/116832/25873/6231/6223/200916/26986/6203/6136/6135/6158/6142/6209/6165/6166/6171/6210/6206/6139/6129/7311/2935/4736/2197/6143/6227/6137/6167/6154/6232/6128/6161/6130/6156/2107/6194/51121/6234/6144/6205/11224/6132/6235/6222/6204/6207/6229/6146/6141/6181/6193/6138/6176/9045/6230/6202/6164	13:Fibroblast	4
Whole PE	GO:0006458	'de novo' protein folding	40	0.550285	1.84312	0.000430926	0.0386668	0.0359982	3446	tags=55%, list=21%, signal=43%	3310/6767/27348/3304/972/10728/3337/3336/2280/131474/573/3306/3329/27433/30001/3312/2281/10576/1861/10808/3313/23753	1:CTB	3			Whole PE	hsa05225	Hepatocellular carcinoma	149	-0.44466	-1.45949	0.00180743	0.0220763	0.0166563	4199	tags=43%, list=27%, signal=32%	7482/6605/7483/6199/4893/4041/6198/7476/2885/5579/4257/581/7473/23401/89780/1857/114112/2475/3265/86/83439/8321/1029/3480/2948/7296/10000/5335/1021/5594/5291/1452/5925/4040/673/1643/8313/324/5295/6599/2549/8289/2932/51426/1871/5290/6934/196528/1026/6654/1956/4087/4233/5894/1499/55193/3845/8323/7475/57492/5336/5728/4089/6595	4:CTB-2	3			Whole PE	R-HSA-2408557	Selenocysteine synthesis	85	0.522952	2.13675	2.4881e-07	2.94094e-05	2.60509e-05	4064	tags=64%, list=31%, signal=44%	51065/116832/25873/6231/6223/200916/6203/6136/6135/6158/6142/6209/6165/6166/6171/6210/6206/6139/6129/7311/4736/2197/6143/6227/6137/6167/6154/6232/6128/6161/6130/6156/6194/51121/6234/6144/6205/11224/6132/6235/6222/6204/6207/6229/6146/6141/6181/6193/6138/6176/9045/6230/6202/6164	13:Fibroblast	4
Whole PE	GO:0071216	cellular response to biotic stimulus	195	0.367377	1.5915	0.00061534	0.0489135	0.0455377	3720	tags=34%, list=23%, signal=26%	2920/10221/949/27063/387/5595/2919/9516/7538/4282/10628/2921/3297/51510/3576/9572/8140/5914/7474/153090/4793/706/2634/3661/2048/948/4067/3552/3394/196/59307/29126/9450/834/2635/8564/148022/3148/11213/7128/114769/942/7133/58509/1649/23729/2950/57103/64581/445/22904/929/7494/54623/4851/55829/3146/80380/207/388325/57003/9646/57048/5970/1019/7001	1:CTB	3			Whole PE	hsa05226	Gastric cancer	118	-0.448503	-1.44483	0.00287051	0.0300969	0.0227077	4199	tags=46%, list=27%, signal=34%	7482/7483/6199/4893/4041/29119/6198/7476/2885/581/7473/23401/89780/1857/2475/3265/2263/83439/8321/5243/9134/1017/10000/5594/5291/1452/5925/4040/673/1643/8313/324/5295/2549/2247/2932/4292/51426/1871/5290/6934/1026/6654/1956/4087/4233/5894/1499/3845/8323/7475/596/4089/1027	4:CTB-2	3			Whole PE	R-HSA-72706	GTP hydrolysis and joining of the 60S ribosomal subunit	103	0.491677	2.07327	2.22969e-07	2.94094e-05	2.60509e-05	3302	tags=51%, list=25%, signal=39%	51065/116832/25873/6231/6223/8666/200916/6203/1983/6136/6135/27335/6158/6142/6209/6165/6166/51386/6171/6210/6206/8663/6139/6129/7311/4736/2197/6143/6227/6137/8662/6167/6154/6232/6128/6161/6130/6156/6194/51121/6234/6144/6205/11224/8664/8668/6132/6235/6222/6204/6207/6229/6146	13:Fibroblast	4
Whole PE	GO:0042254	ribosome biogenesis	296	0.517684	2.35396	1e-10	1.0135e-07	9.43553e-08	3871	tags=51%, list=24%, signal=40%	10360/4809/55651/55505/51504/6218/6128/10436/55272/23246/6194/6205/11224/9669/26156/51491/6129/4869/51154/9045/6209/51550/5901/6217/114049/56915/6125/51042/22927/6135/27341/2971/387338/9775/6152/9221/51116/56902/29081/51119/51187/6202/54475/6203/6147/6175/55646/9188/10248/51602/9136/6154/28987/6208/6165/10775/79039/55661/6155/2091/23404/6230/55341/6193/6207/83743/404672/6206/10412/6229/6838/23016…	1:CTB	2			Whole PE	hsa04360	Axon guidance	157	-0.416048	-1.37061	0.00623412	0.0468914	0.035379	2772	tags=30%, list=18%, signal=25%	8440/9353/4756/3265/5534/4775/56288/5532/5335/5594/9860/5291/91653/23380/57522/5362/6259/54434/5781/5295/6093/59277/5062/5921/2932/5290/23365/1946/818/57556/4233/5727/5894/3845/5533/9723/9475/5747/2770/3688/5336/4773/80031/658/8829/5530/6091	4:CTB-2	3			Whole PE	R-HSA-72613	Eukaryotic Translation Initiation	110	0.456602	1.9535	2.42282e-06	0.000214783	0.000190255	3302	tags=50%, list=25%, signal=38%	51065/116832/25873/6231/6223/8666/200916/26986/6203/1983/6136/6135/27335/6158/6142/6209/6165/6166/51386/6171/6210/6206/8663/6139/6129/7311/4736/1967/2197/6143/6227/6137/8662/6167/6154/6232/6128/6161/6130/6156/6194/51121/6234/6144/6205/11224/8664/8668/6132/6235/6222/6204/6207/6229/6146	13:Fibroblast	4
Whole PE	GO:0042274	ribosomal small subunit biogenesis	98	0.59659	2.35268	1e-10	1.0135e-07	9.43553e-08	3328	tags=57%, list=20%, signal=46%	4809/6218/10436/55272/6194/6205/4869/6209/6217/27341/56902/6202/6203/51602/9136/28987/6208/2091/6230/6193/6207/404672/6206/6229/6838/6189/29777/51406/51081/6169/92856/6210/11056/57050/6228/23212/65095/65083/6201/6227/91582/6232/10799/57647/51118/128061/6223/705/84294/25983/51096/6234/51065/10528/10199/2068	1:CTB	2			Whole PE	hsa05200	Pathways in cancer	442	-0.370155	-1.26341	0.00643229	0.0473526	0.0357269	3999	tags=34%, list=26%, signal=26%	3566/3911/4893/2335/4041/6789/29119/1612/6198/22798/7185/7476/3600/1387/2885/1910/108/3574/5579/805/2034/4257/3455/10672/8030/1441/26060/808/581/3459/840/7473/23401/2113/89780/2271/115/113/624/1857/5888/114112/284217/2792/2475/10018/1147/1284/112/5337/4436/5468/3265/2263/54331/83439/8321/2737/7175/1488/7423/2956/1029/329/9134/3480/1017/2948/7296/317/10000/5335/1021/5594/6777/5291/9252/2033/5925/3…	4:CTB-2	3			Whole PE	R-HSA-72737	Cap-dependent Translation Initiation	110	0.456602	1.9535	2.42282e-06	0.000214783	0.000190255	3302	tags=50%, list=25%, signal=38%	51065/116832/25873/6231/6223/8666/200916/26986/6203/1983/6136/6135/27335/6158/6142/6209/6165/6166/51386/6171/6210/6206/8663/6139/6129/7311/4736/1967/2197/6143/6227/6137/8662/6167/6154/6232/6128/6161/6130/6156/6194/51121/6234/6144/6205/11224/8664/8668/6132/6235/6222/6204/6207/6229/6146	13:Fibroblast	4
Whole PE	GO:0006364	rRNA processing	209	0.517038	2.26921	1e-10	1.0135e-07	9.43553e-08	3871	tags=51%, list=24%, signal=39%	10360/4809/55651/55505/51504/6218/10436/55272/23246/6194/11224/26156/6129/51154/9045/6209/6217/114049/56915/6125/6135/27341/387338/9775/9221/29081/51119/6202/55646/9188/10248/51602/9136/6154/28987/6208/6165/10775/79039/55661/6155/2091/23404/6230/404672/10412/6229/23016/29777/10969/51013/10557/92856/11340/3669/11056/4736/57050/10200/55011/55299/10556/23212/65095/9875/54663/65083/6201/6227/6130/545…	1:CTB	2			Whole PE	hsa04620	Toll-like receptor signaling pathway	82	0.485645	2.11465	6.91804e-07	8.16328e-05	5.51016e-05	1706	tags=34%, list=13%, signal=30%	5291/1326/3454/5879/8772/6696/5603/5970/3569/7097/3455/10000/7099/29110/207/3576/4790/3716/3553/54472/3663/7096/942/5605/941/929/5594/4615	10:Monocyte	2			Whole PE	R-HSA-927802	Nonsense-Mediated Decay (NMD)	106	0.445526	1.89396	1.64175e-05	0.00116433	0.00103137	4064	tags=60%, list=31%, signal=42%	51065/116832/25873/6231/6223/200916/26986/6203/55629/56006/6136/6135/6158/6142/6209/6165/6166/6171/6210/6206/6139/6129/7311/2935/4736/2197/6143/6227/6137/6167/6154/6232/6128/6161/6130/6156/2107/6194/51121/6234/6144/5518/6205/11224/55181/6132/6235/6222/6204/6207/6229/6146/55110/6141/6181/6193/10921/23381/6138/6176/9045/6230/6202/6164	13:Fibroblast	4
Whole PE	GO:0140053	mitochondrial gene expression	160	0.532711	2.25123	1e-10	1.0135e-07	9.43553e-08	4580	tags=61%, list=28%, signal=44%	219402/64981/122704/64960/79590/80298/51318/80324/9238/64976/64928/51650/90480/6472/65005/26589/64969/51258/55168/84275/51116/51253/60488/51642/219927/7818/65008/28998/64983/64432/28958/6182/78988/84300/54460/51649/116541/63931/51250/64979/54516/51073/51081/64968/55052/56945/65003/51264/115416/79072/51021/708/28957/65993/116540/81554/51373/29093/3396/6183/10102/54948/124995/118487/51023/29088/649…	1:CTB	2			Whole PE	hsa04142	Lysosome	121	0.399746	1.84442	1.1502e-05	0.000452412	0.000305375	2761	tags=39%, list=20%, signal=31%	1509/967/1514/26985/1200/6556/533/51606/8546/5476/3916/11154/7805/4126/51172/4891/10312/1522/968/2517/23431/9741/23163/1213/23312/2581/138050/79158/22901/10577/1657/8763/5538/10947/6272/1508/23062/55353/2799/2588/527/256471/162/3988/950/8907/3482	10:Monocyte	2			Whole PE	R-HSA-975957	Nonsense Mediated Decay (NMD) enhanced by the Exon Junction Complex (EJC)	106	0.445526	1.89396	1.64175e-05	0.00116433	0.00103137	4064	tags=60%, list=31%, signal=42%	51065/116832/25873/6231/6223/200916/26986/6203/55629/56006/6136/6135/6158/6142/6209/6165/6166/6171/6210/6206/6139/6129/7311/2935/4736/2197/6143/6227/6137/6167/6154/6232/6128/6161/6130/6156/2107/6194/51121/6234/6144/5518/6205/11224/55181/6132/6235/6222/6204/6207/6229/6146/55110/6141/6181/6193/10921/23381/6138/6176/9045/6230/6202/6164	13:Fibroblast	4
Whole PE	GO:0022613	ribonucleoprotein complex biogenesis	435	0.446374	2.07623	1e-10	1.0135e-07	9.43553e-08	3871	tags=46%, list=24%, signal=36%	23521/10360/4809/55651/8669/55505/51504/6218/6128/10436/55272/23246/6194/8668/6205/11224/3326/6629/9669/26156/10480/10856/51491/6633/6129/8894/4869/51154/9045/6209/83443/51550/6632/51386/5901/6217/6880/51639/6634/114049/56915/6637/6125/51042/22927/6135/26523/27341/2971/6636/8666/387338/9775/10907/6627/10713/6152/9221/51116/56902/29081/51119/51187/6202/54475/6203/6147/6175/55646/9188/1207/8667/663…	1:CTB	2			Whole PE	hsa04071	Sphingolipid signaling pathway	104	0.402761	1.84237	2.34777e-05	0.000692593	0.000467495	2426	tags=37%, list=18%, signal=30%	5291/1509/5728/5337/259230/387/8877/5879/5603/9475/5970/3845/10000/5331/207/4790/5528/5894/2768/2770/55012/9517/5338/5529/5605/4217/5594/81537/79603/7132/56624/5599/5880/8560/166929/9294/2534/6093	10:Monocyte	2			Whole PE	R-HSA-2408522	Selenoamino acid metabolism	98	0.436147	1.81756	3.6181e-05	0.00237589	0.00210456	3302	tags=48%, list=25%, signal=36%	4837/51065/116832/25873/6231/6223/200916/6203/6136/6135/6158/6142/6209/6165/6166/6171/6210/6206/6139/6129/7311/4736/2197/6143/6227/6137/6167/6154/6232/51540/6128/6161/6130/6156/6194/51121/6234/6144/6205/11224/6132/6235/6222/6204/6207/6229/6146	13:Fibroblast	4
Whole PE	GO:0016072	rRNA metabolic process	243	0.467512	2.0751	1e-10	1.0135e-07	9.43553e-08	3871	tags=48%, list=24%, signal=37%	10360/4809/55651/55505/51504/6218/10436/55272/23246/6194/11224/26156/6129/79002/51154/9045/6209/6217/114049/56915/6125/6135/27341/2971/387338/9775/9221/29081/51119/6202/55646/9188/112495/10248/51602/9136/162989/6154/28987/6208/6165/10775/79039/55661/6155/2091/23404/6230/6598/404672/10412/6229/23016/29777/10969/51013/10557/92856/11340/3669/6949/11056/4736/57050/10200/55011/55299/10556/23212/65095/…	1:CTB	2			Whole PE	hsa04510	Focal adhesion	162	0.359298	1.76303	3.5571e-05	0.000839476	0.00056664	1172	tags=21%, list=9%, signal=19%	5291/5728/56034/2885/3688/3685/2317/2012/2889/6655/387/5879/6696/824/9475/7094/10000/7423/207/3915/3611/4233/6714/10298/1499/3914/329/5908/5894/3696/103910/4659/394/3678	10:Monocyte	2			Whole PE	R-HSA-72695	Formation of the ternary complex, and subsequently, the 43S complex	47	0.542888	1.97035	0.0001198	0.00643655	0.00570151	3300	tags=53%, list=25%, signal=40%	51065/6231/6223/8666/6203/27335/6209/51386/6210/6206/8663/2197/6227/8662/6232/6194/6234/6205/8664/8668/6235/6222/6204/6207/6229	13:Fibroblast	4
Whole PE	GO:0006457	protein folding	190	0.459136	1.98139	1.10796e-08	6.48086e-06	6.03358e-06	3513	tags=43%, list=22%, signal=34%	7265/3315/567/5478/3326/1191/25764/10856/3310/6767/27348/3304/9531/1155/2288/131118/80273/5204/1676/10450/23770/4880/3301/6903/10491/53938/10465/3320/134218/728489/8570/6904/10471/6950/972/64772/10049/908/9049/10726/5203/10728/10694/3337/3336/2280/131474/573/9141/51645/7203/5481/3306/5202/10598/5479/3329/169714/27433/10131/81611/23640/30001/3312/402/6902/51398/79031/2281/6905/79087/9526/11140/228…	1:CTB	2			Whole PE	hsa05203	Viral carcinogenesis	153	0.360162	1.75362	3.33666e-05	0.000839476	0.00056664	2503	tags=32%, list=18%, signal=26%	5291/5315/2885/3105/387/3107/4193/23352/6672/5879/1959/6908/3133/7531/5970/3845/27044/3106/5933/5610/7533/2960/5922/6714/4790/3716/1234/4067/64764/7337/2961/10488/55697/6777/6850/5594/7534/1385/998/894/2957/5829/578/1019/1232/2033/1386/8841/468	10:Monocyte	2			Whole PE	R-HSA-9754678	SARS-CoV-2 modulates host translation machinery	47	0.506374	1.83783	0.000557371	0.0186578	0.0165271	3300	tags=47%, list=25%, signal=35%	51065/6231/6223/6633/6203/11218/6209/6210/6206/2197/6227/6232/79760/6194/6234/6205/6636/6235/6222/6204/6207/6229	13:Fibroblast	4
Whole PE	GO:0034470	ncRNA processing	403	0.375558	1.7352	6.06787e-08	2.42864e-05	2.26102e-05	3982	tags=37%, list=24%, signal=29%	10360/283120/4809/55651/55505/51504/6218/10436/55272/23246/6194/6741/11224/26156/6129/51154/54974/80324/9045/6209/6217/114049/51002/56915/6125/115708/84520/6135/26523/27341/79650/387338/9775/4234/9221/51637/29081/51119/6202/55646/9188/116461/10248/51602/9136/6154/6428/28987/6208/6165/6774/10775/79039/55661/6155/2091/23404/55596/6230/6895/339487/404672/10412/6229/23016/285381/29777/10969/51013/105…	1:CTB	2			Whole PE	hsa01521	EGFR tyrosine kinase inhibitor resistance	71	0.447711	1.89835	0.000128118	0.00188975	0.00127557	1944	tags=31%, list=14%, signal=27%	5291/2309/5728/56034/2885/4763/6655/3569/3845/10000/207/4233/6714/3716/5894/5605/6654/5594/3082/3480/6464/1956	10:Monocyte	2			Whole PE	R-HSA-72649	Translation initiation complex formation	54	0.45135	1.68167	0.00199604	0.0485409	0.0429976	3300	tags=48%, list=25%, signal=36%	51065/6231/6223/8666/26986/6203/27335/6209/51386/6210/6206/8663/2197/6227/8662/6232/6194/6234/6205/8664/8668/6235/6222/6204/6207/6229	13:Fibroblast	4
Whole PE	GO:0009060	aerobic respiration	162	0.468469	1.98498	9.39076e-08	3.07061e-05	2.85869e-05	4731	tags=59%, list=29%, signal=42%	79085/515/664/387/55967/388753/4725/30968/6472/2395/84275/4718/4696/7388/790955/7381/10476/9551/51103/509/521/1340/84300/27069/4700/539/1347/51142/27089/47/54205/11315/5018/4191/514/51079/4712/3419/4715/9377/4710/29103/4728/4190/7415/10632/7385/4709/4731/1329/6834/402/4697/158/1327/113115/10975/29796/1350/65990/4704/983/637/4717/6392/4722/9167/400916/4720/4726/4706/4702/84277/4701/79736/1351/4695…	1:CTB	2			Whole PE	hsa04714	Thermogenesis	180	-0.389536	-1.67964	0.000125545	0.00188975	0.00127557	3239	tags=40%, list=24%, signal=31%	493753/10891/123096/4708/4713/55744/516/4726/6391/2181/1327/514/109/3265/506/6597/1355/4701/4710/116228/515/5606/196883/55471/4725/65260/498/55811/27089/7381/4704/6603/57104/9551/6605/84987/1340/1350/522/29796/4717/4731/6599/4723/10632/4706/126328/6604/4712/4707/4705/113/521/517/57521/6390/2475/4695/4722/57492/1352/28958/509/4711/4709/25915/6595/51287/4696/4716/539/9586	10:Monocyte	2			Whole PE	R-HSA-9735869	SARS-CoV-1 modulates host translation machinery	34	0.523302	1.76837	0.00209321	0.0488368	0.0432597	3300	tags=53%, list=25%, signal=40%	51065/6231/6223/6203/6209/6210/6206/2197/6227/6232/6194/6234/6205/6235/6222/6204/6207/6229	13:Fibroblast	4
Whole PE	GO:0048193	Golgi vesicle transport	272	-0.361473	-1.79492	1.62298e-07	5.06122e-05	4.71191e-05	2503	tags=32%, list=15%, signal=28%	222068/54536/23299/59349/9321/6844/9522/83548/10066/10239/91949/55763/51014/5870/84364/2803/8774/3998/10466/6642/26286/60561/57120/63971/60684/11196/9980/9527/9382/60412/23233/80006/10791/372/143187/122553/55014/84068/9217/57020/26984/11031/4905/10564/4430/164/583/2060/1315/10427/9135/65258/8615/10640/9919/83696/288/55770/9871/53407/10484/22872/64083/23256/27252/9950/51594/23760/54832/6683/4253/5…	1:CTB	2			Whole PE	hsa04015	Rap1 signaling pathway	157	0.339098	1.65816	0.000115949	0.00188975	0.00127557	1947	tags=26%, list=14%, signal=23%	5291/9732/56034/3688/2260/2889/387/5900/1902/5879/6494/5603/7094/6237/5898/3845/10000/5331/7423/207/57568/3684/4233/6714/1499/5908/5894/2770/9693/135/23683/1946/5605/5216/5594/3082/9170/3480/998/1956/808	10:Monocyte	2			Whole PE	R-HSA-72702	Ribosomal scanning and start codon recognition	54	0.449836	1.67603	0.00207864	0.0488368	0.0432597	3300	tags=48%, list=25%, signal=36%	51065/6231/6223/8666/6203/1983/27335/6209/51386/6210/6206/8663/2197/6227/8662/6232/6194/6234/6205/8664/8668/6235/6222/6204/6207/6229	13:Fibroblast	4
Whole PE	GO:0042255	ribosome assembly	55	0.611418	2.19389	4.28628e-07	0.000124119	0.000115552	4115	tags=69%, list=25%, signal=52%	6128/23246/9669/4869/51154/6209/6125/6135/27341/6152/51116/51119/54475/6147/6175/6208/6193/29777/51081/6169/51388/55052/55299/23212/708/6232/57647/6223/3692/84231/84769/6234/51065/56342/4839/26284/84273/51335	1:CTB	2			Whole PE	hsa04014	Ras signaling pathway	167	0.336344	1.6413	0.000121622	0.00188975	0.00127557	2003	tags=27%, list=15%, signal=23%	5291/56034/2885/4763/382/5337/2260/6655/387/5900/5879/8036/6237/5970/5898/3845/10000/29110/57186/7423/207/5922/4233/10298/4790/5908/5894/54331/5878/5338/1946/2113/5605/2782/6654/9462/5594/3082/3480/998/6464/1956/808/51365/10928	10:Monocyte	2			Whole PE	R-HSA-156842	Eukaryotic Translation Elongation	86	0.779329	3.03906	1e-10	2.82879e-09	2.30622e-09	2657	tags=88%, list=16%, signal=74%	6224/23521/6124/9349/1936/6218/6128/6160/6181/200916/1915/6194/6205/11224/6129/6143/9045/6209/6158/6217/6132/6125/6161/6135/1937/6152/6146/6123/6159/6202/6203/6137/6147/25873/6175/6167/6176/6154/1933/6157/6208/6139/6165/6155/6141/6230/6193/6207/6206/7311/6229/6133/6138/6189/6142/6169/6222/6171/6210/6233/6144/1938/6168/6188/4736/6228/6201/6122/6227/6130/6232/6156/6164/6187/2197/6223	1:CTB	4
Whole PE	GO:0045333	cellular respiration	203	0.423751	1.84807	6.83862e-07	0.000184825	0.000172069	4731	tags=55%, list=29%, signal=39%	79085/515/664/387/55967/388753/4725/30968/6472/2395/84275/4718/4696/7388/790955/114789/7381/10476/9551/51103/509/521/1340/23596/84300/27069/4700/539/1347/9997/51142/27089/47/54205/11315/4776/5018/4191/144363/514/51079/55847/4712/3419/4715/9377/4710/29103/4728/4190/84269/7415/10131/10632/7385/4709/4731/1329/6834/402/4697/158/1327/113115/10975/5339/29796/83733/1350/65990/4704/983/3588/10891/637/471…	1:CTB	2			Whole PE	hsa05167	Kaposi sarcoma-associated herpesvirus infection	160	0.341778	1.67864	0.00015126	0.00214185	0.00144573	2344	tags=33%, list=17%, signal=28%	5291/23533/3105/3107/3454/1871/5879/8772/5603/3133/2919/5970/3569/3455/3845/2920/10000/2921/29110/3106/207/3576/5610/6714/4790/1499/3716/1234/5530/5894/4067/5533/54331/84557/942/6850/5605/2782/5594/3091/1385/6772/808/4609/5532/7132/5599/578/1019/1230/5289/1232/2033	10:Monocyte	2			Whole PE	R-HSA-156902	Peptide chain elongation	83	0.777013	3.00879	1e-10	2.82879e-09	2.30622e-09	3261	tags=94%, list=20%, signal=76%	6224/23521/6124/9349/6218/6128/6160/6181/200916/1915/6194/6205/11224/6129/6143/9045/6209/6158/6217/6132/6125/6161/6135/6152/6146/6123/6159/6202/6203/6137/6147/25873/6175/6167/6176/6154/6157/6208/6139/6165/6155/6141/6230/6193/6207/6206/7311/6229/6133/6138/6189/6142/6169/6222/6171/6210/6233/6144/1938/6168/6188/4736/6228/6201/6122/6227/6130/6232/6156/6164/6187/2197/6223/6235/51121/6234/6136/51065	1:CTB	4
Whole PE	GO:0072522	purine-containing compound biosynthetic process	229	0.403188	1.78588	7.70268e-07	0.000201462	0.000187558	4248	tags=41%, list=26%, signal=31%	125061/527/283120/11332/4907/515/26289/111/55967/4725/30968/4831/3615/9524/204/2987/4830/23475/353/6472/4718/272/4696/790955/10476/9551/4880/54981/100/2023/509/10135/521/23057/4860/38/5166/471/441024/4700/196883/539/47/4837/55191/514/51079/4712/8564/4715/55811/4710/4728/516/7415/10632/4709/4731/158/3614/51144/65990/518/4704/56952/10891/4717/6392/226/2180/4722/7040/4720/4726/79071/4706/51703/109/4…	1:CTB	2			Whole PE	hsa05169	Epstein-Barr virus infection	175	0.331871	1.63676	0.00016721	0.00227662	0.0015367	2184	tags=28%, list=16%, signal=24%	5291/960/7431/25942/3105/3107/5717/3454/1871/9612/4193/5879/8772/5603/3133/5970/3569/7097/3455/10000/29110/3106/811/207/5707/5610/4790/3716/6890/5971/4067/5708/7128/6850/11047/4615/8819/567/5714/6772/2923/894/5701/4609/965/5713/5599/578/1019	10:Monocyte	2			Whole PE	R-HSA-72689	Formation of a pool of free 40S subunits	94	0.762601	3.0085	1e-10	2.82879e-09	2.30622e-09	3261	tags=89%, list=20%, signal=72%	6224/23521/6124/8669/9349/6218/6128/6160/6181/200916/6194/8668/6205/11224/10480/6129/6143/9045/6209/6158/51386/6217/6132/6125/6161/6135/8666/6152/6146/6123/6159/6202/6203/6137/6147/25873/6175/8667/6167/6176/6154/6157/6208/6139/6165/6155/6141/6230/6193/6207/6206/7311/6229/6133/6138/6189/6142/6169/6222/6171/6210/6233/6144/6168/6188/4736/6228/6201/6122/6227/6130/6232/6156/6164/6187/2197/6223/8662/62…	1:CTB	4
Whole PE	GO:0006338	chromatin remodeling	495	-0.291459	-1.52866	4.39293e-06	0.000934455	0.000869963	2992	tags=30%, list=18%, signal=25%	1111/1788/10600/57708/9675/2033/79960/7022/8888/84656/6045/11143/51147/80063/221037/10664/84787/51742/64324/51230/5562/55689/51773/1107/25942/23451/51780/5925/80853/1642/4676/6015/339287/23774/22992/79813/79903/9759/6602/8648/9219/57504/9733/23512/50485/9425/29994/8626/79829/5928/80312/7874/84083/605/54496/375748/9044/2186/55683/93166/58508/28996/200424/9077/1859/9252/11168/5563/22955/55193/56950…	1:CTB	2			Whole PE	hsa03040	Spliceosome	126	-0.404832	-1.67257	0.000247134	0.00273392	0.00184537	2408	tags=29%, list=18%, signal=24%	10291/494115/58517/3178/9410/3305/9984/9879/10450/10915/1665/4116/51639/29896/8175/3192/6635/9343/84950/57819/26121/6434/6636/4809/23658/11157/6631/51362/9775/10286/51690/55110/6637/3303/3304/3310/3312	10:Monocyte	2			Whole PE	R-HSA-72764	Eukaryotic Translation Termination	86	0.770898	3.00618	1e-10	2.82879e-09	2.30622e-09	2657	tags=86%, list=16%, signal=72%	6224/23521/6124/9349/51504/6218/6128/6160/6181/200916/6194/6205/11224/327/6129/6143/9045/6209/6158/6217/6132/6125/6161/6135/6152/6146/6123/6159/2935/6202/6203/6137/6147/25873/6175/6167/6176/6154/6157/6208/6139/6165/6155/6141/6230/6193/6207/6206/7311/6229/6133/6138/6189/6142/6169/6222/6171/6210/6233/6144/6168/6188/4736/6228/6201/6122/6227/6130/6232/6156/6164/6187/2197/6223	1:CTB	4
Whole PE	GO:0033617	mitochondrial cytochrome c oxidase assembly	23	0.708573	2.0743	5.78487e-06	0.00114399	0.00106504	2374	tags=61%, list=15%, signal=52%	79064/389203/51287/55744/493753/6341/617/28958/84334/9997/10063/100131801/79072/6834	1:CTB	2			Whole PE	hsa00010	Glycolysis / Gluconeogenesis	42	0.506838	1.95011	0.000272973	0.00284213	0.00191842	1634	tags=36%, list=12%, signal=32%	5315/5223/3939/2597/2023/7167/3098/2203/2026/2821/223/226/230/1738/5214	10:Monocyte	2			Whole PE	R-HSA-156827	L13a-mediated translational silencing of Ceruloplasmin expression	103	0.744	2.98362	1e-10	2.82879e-09	2.30622e-09	3668	tags=90%, list=22%, signal=70%	6224/23521/6124/8669/9349/6218/6128/6160/6181/200916/6194/8668/6205/11224/7458/10480/6129/8894/6143/9045/6209/6158/51386/6217/6132/6125/6161/1973/6135/8666/6152/6146/6123/6159/6202/6203/6137/6147/25873/6175/8667/6167/6176/6154/6157/6208/6139/6165/6155/26986/6141/6230/6193/6207/6206/7311/6229/6133/6138/6189/6142/6169/6222/6171/6210/6233/6144/6168/6188/4736/6228/6201/6122/6227/6130/6232/6156/6164/6…	1:CTB	4
Whole PE	GO:0018209	peptidyl-serine modification	255	-0.339387	-1.67377	1.14503e-05	0.00206309	0.0019207	2841	tags=31%, list=17%, signal=26%	284/7048/4139/5894/3551/11137/64324/5562/2872/23049/9770/6198/9647/143888/117854/8550/8569/6732/11329/2932/4909/5217/28996/1859/5591/4294/9252/9451/29110/253260/5170/57521/9475/1956/2475/79109/545/9113/11011/351/1452/51719/53944/4092/6622/9149/1389/6093/627/1017/5599/1147/4140/8317/96459/493/8440/6789/472/5586/23012/51701/200576/5290/26524/10142/6733/5567/2589/7037/85440/23171/65981/23515/5601/97…	1:CTB	2			Whole PE	hsa05100	Bacterial invasion of epithelial cells	71	0.425982	1.80622	0.000345242	0.00339488	0.00229152	2274	tags=31%, list=17%, signal=26%	5291/3688/10552/387/1495/23607/5879/79658/10109/3611/867/4233/6714/1499/3678/1213/998/6464/5829/10095/10459/2335	10:Monocyte	2			Whole PE	R-HSA-975956	Nonsense Mediated Decay (NMD) independent of the Exon Junction Complex (EJC)	88	0.760249	2.97266	1e-10	2.82879e-09	2.30622e-09	3662	tags=93%, list=22%, signal=73%	6224/23521/6124/9349/6218/6128/6160/6181/200916/6194/6205/11224/6129/6143/9045/6209/6158/6217/6132/6125/6161/6135/6152/6146/6123/6159/2935/6202/6203/6137/6147/25873/6175/6167/6176/6154/6157/6208/6139/6165/6155/26986/6141/6230/6193/6207/6206/7311/6229/6133/6138/6189/6142/6169/6222/6171/6210/6233/6144/6168/6188/4736/6228/6201/6122/6227/6130/6232/6156/6164/6187/2197/6223/6235/51121/6234/6136/51065/1…	1:CTB	4
Whole PE	GO:0015980	energy derivation by oxidation of organic compounds	273	0.370632	1.66967	1.13696e-05	0.00206309	0.0019207	4574	tags=48%, list=28%, signal=35%	79085/515/664/387/55967/388753/4725/30968/2997/6472/37/2395/84275/4718/4696/7388/790955/114789/9572/7381/10476/9551/51103/509/521/3481/1340/23596/84300/27069/4700/539/5507/1347/9997/51142/27089/47/54205/11315/4776/5018/10728/4191/9945/144363/514/51079/55847/4712/3419/4715/9377/55811/4710/29103/4728/4190/84269/7415/10131/10632/7385/4709/4731/1329/6834/402/4697/158/1327/5443/113115/10975/5339/29796…	1:CTB	2			Whole PE	hsa05146	Amoebiasis	79	0.416753	1.81167	0.000385326	0.00368663	0.00248845	1175	tags=27%, list=9%, signal=24%	5291/3554/5272/2919/5970/3569/7097/2920/2921/7099/5331/7040/3915/7042/3576/3684/4790/3914/5273/3553/5878	10:Monocyte	2			Whole PE	R-HSA-72706	GTP hydrolysis and joining of the 60S ribosomal subunit	104	0.740313	2.97131	1e-10	2.82879e-09	2.30622e-09	3668	tags=89%, list=22%, signal=70%	6224/23521/6124/8669/9349/6218/6128/6160/6181/200916/6194/8668/6205/11224/7458/9669/10480/6129/8894/6143/9045/6209/6158/51386/6217/6132/6125/6161/1973/6135/8666/6152/6146/6123/6159/6202/6203/6137/6147/25873/6175/8667/6167/6176/6154/6157/6208/6139/6165/6155/6141/6230/6193/6207/6206/7311/6229/6133/6138/6189/6142/6169/6222/6171/6210/6233/6144/6168/6188/4736/6228/6201/6122/6227/6130/6232/6156/6164/61…	1:CTB	4
Whole PE	GO:0009152	purine ribonucleotide biosynthetic process	185	0.407908	1.75382	1.74555e-05	0.00301127	0.00280344	4383	tags=45%, list=27%, signal=33%	527/283120/11332/515/26289/111/55967/4725/30968/4831/3615/9524/204/4830/353/4718/272/4696/790955/10476/9551/4880/100/2023/509/521/38/5166/471/4700/196883/539/47/514/51079/4712/4715/55811/4710/4728/516/7415/10632/4709/4731/158/3614/51144/65990/518/4704/10891/4717/6392/226/2180/4722/7040/4720/4726/79071/4706/51703/109/4702/84277/4701/4833/10201/4695/522/55902/517/4708/513/4724/374291/1353/4716/9061…	1:CTB	2			Whole PE	hsa04218	Cellular senescence	140	0.341911	1.63489	0.000527918	0.00455812	0.0030767	1035	tags=22%, list=8%, signal=21%	5291/28996/2309/5728/23291/3105/3107/1871/4193/10758/5603/3133/824/6237/5970/3569/3845/10000/7048/7040/3106/207/7042/5933/3576/7416/4790/5530/5894/5533/3552	10:Monocyte	2			Whole PE	R-HSA-2408557	Selenocysteine synthesis	86	0.760492	2.9656	1e-10	2.82879e-09	2.30622e-09	3261	tags=88%, list=20%, signal=71%	6224/23521/6124/9349/6218/6128/6160/6181/200916/6194/6205/11224/6129/6143/9045/6209/6158/6217/6132/6125/6161/6135/6152/6146/6123/6159/6202/6203/6137/6147/25873/6175/6167/6176/6154/6157/6208/6139/6165/6155/6141/6230/6193/6207/6206/7311/6229/6133/6138/6189/6142/6169/6222/6171/6210/6233/6144/6168/6188/4736/6228/6201/6122/6227/6130/6232/6156/6164/6187/2197/6223/6235/51121/6234/6136/51065	1:CTB	4
Whole PE	GO:0022904	respiratory electron transport chain	102	0.475896	1.89446	1.90369e-05	0.00321566	0.00299373	4574	tags=64%, list=28%, signal=46%	55967/388753/4725/4718/4696/7388/790955/7381/51103/1340/27069/4700/1347/9997/51142/27089/54205/11315/144363/4712/4715/9377/4710/29103/4728/7385/4709/4731/1329/4697/1327/10975/5339/29796/83733/1350/4704/983/10891/637/4717/6392/4722/9167/4720/4726/4706/79751/4702/4701/1351/4695/2109/2108/1337/4708/4724/374291/4716/4707/4713/54949/1345/4729/4711	1:CTB	2			Whole PE	hsa05012	Parkinson disease	208	-0.354257	-1.55542	0.000631302	0.00532097	0.00359162	3366	tags=38%, list=25%, signal=29%	10105/1616/7277/347688/10213/4708/5693/4713/2771/516/4726/6391/5694/1327/6531/11315/7311/514/506/5335/5706/4701/4710/515/23516/2773/10376/5683/29985/5685/4725/7327/498/65018/6647/27089/7381/4704/1340/201266/5684/25828/1350/522/29796/4717/4731/4723/90550/7314/1965/4706/126328/5691/4712/4707/4705/91860/1649/517/7157/6390/9451/7316/4695/4722/5705/509/4711/842/818/57181/4709/1843/120892/4696/805/4716…	10:Monocyte	2			Whole PE	R-HSA-192823	Viral mRNA Translation	83	0.763501	2.95647	1e-10	2.82879e-09	2.30622e-09	3261	tags=92%, list=20%, signal=74%	6224/23521/6124/9349/6218/6128/6160/6181/200916/6194/6205/11224/6129/6143/9045/6209/6158/6217/6132/6125/6161/6135/6152/6146/6123/6159/6202/6203/6137/6147/25873/6175/6167/6176/6154/6157/6208/6139/6165/6155/6141/6230/6193/6207/6206/7311/6229/6133/6138/6189/6142/6169/6222/6171/6210/6233/6144/6168/6188/4736/6228/6201/6122/6227/6130/6232/6156/6164/6187/2197/6223/6235/51121/6234/6136/51065	1:CTB	4
Whole PE	GO:1901293	nucleoside phosphate biosynthetic process	253	0.378366	1.69215	2.51685e-05	0.0040013	0.00372515	4248	tags=41%, list=26%, signal=31%	125061/527/283120/11332/6241/515/26289/80308/111/55967/4725/30968/4831/3615/9524/204/2987/4830/23475/353/4718/272/4696/790955/10476/9551/4880/54981/100/2023/509/10135/521/23057/4860/38/7378/5166/471/441024/4700/196883/539/1854/47/4837/7372/55191/514/51079/4712/8564/4715/55811/4710/122481/4728/516/7415/10632/4709/7083/4731/158/3614/51144/65990/1635/518/4704/10891/4717/6392/226/2180/790/4722/7040/4…	1:CTB	2			Whole PE	hsa04072	Phospholipase D signaling pathway	115	0.342054	1.56826	0.000781074	0.00643024	0.00434036	1999	tags=29%, list=15%, signal=25%	5291/23533/56034/2885/382/5337/6655/387/8877/5900/1902/8613/6237/5898/3845/10000/5331/207/3576/5894/2768/5338/7248/6850/5605/6654/160851/5594/9170/6464/1956/8611/23396	10:Monocyte	2			Whole PE	R-HSA-1799339	SRP-dependent cotranslational protein targeting to membrane	105	0.736212	2.95478	1e-10	2.82879e-09	2.30622e-09	3261	tags=83%, list=20%, signal=67%	6224/23521/6124/9349/23478/6218/6128/6160/6181/200916/6194/6205/11224/6129/6143/9045/6209/6158/6217/6132/6125/6161/6135/6184/6727/6152/6146/6123/6159/6202/6203/6137/6147/25873/6175/6167/6176/6154/6157/6208/6139/6165/6155/6141/6230/6193/6207/6206/7311/6745/6229/6133/6138/6189/6142/6169/6222/6171/6210/6233/6144/6168/6188/4736/6228/6201/6122/6731/6227/6130/6232/6156/6164/6187/23480/2197/10952/6223/2…	1:CTB	4
Whole PE	GO:0009260	ribonucleotide biosynthetic process	198	0.389243	1.69023	3.26991e-05	0.00509854	0.00474666	4907	tags=48%, list=30%, signal=34%	527/283120/11332/515/26289/111/55967/4725/30968/4831/3615/9524/204/4830/353/4718/272/4696/790955/10476/9551/4880/100/2023/509/521/38/7378/5166/471/4700/196883/539/47/7372/514/51079/4712/4715/55811/4710/4728/516/7415/10632/4709/4731/158/3614/51144/65990/518/4704/10891/4717/6392/226/2180/790/4722/7040/4720/54963/4726/79071/4706/51703/109/4702/84277/4701/4833/10201/4695/522/55902/517/4708/513/4724/3…	1:CTB	2			Whole PE	hsa04810	Regulation of actin cytoskeleton	173	0.312406	1.53873	0.000902411	0.00694464	0.00468758	2207	tags=26%, list=16%, signal=22%	5291/54434/56034/3688/10552/3685/2260/6655/387/1902/5879/10109/9475/6237/3845/10000/207/5305/3684/10152/6714/10298/5894/28984/2768/200576/3696/103910/4659/3678/8826/5605/6654/5216/5594/9170/998/5962/1956/23396/5829/10095/1072/5880/735	10:Monocyte	2			Whole PE	R-HSA-72613	Eukaryotic Translation Initiation	111	0.727058	2.93174	1e-10	2.82879e-09	2.30622e-09	3668	tags=86%, list=22%, signal=67%	6224/23521/6124/8669/9349/6218/6128/6160/6181/200916/6194/8668/6205/11224/7458/9669/10480/6129/8894/6143/9045/6209/6158/51386/6217/6132/6125/6161/1973/6135/8666/6152/6146/6123/6159/6202/6203/6137/6147/25873/6175/8667/6167/6176/6154/6157/6208/6139/6165/6155/26986/6141/6230/6193/6207/6206/7311/6229/6133/6138/6189/6142/8892/6169/6222/6171/6210/6233/6144/6168/6188/4736/6228/6201/6122/6227/6130/6232/6…	1:CTB	4
Whole PE	GO:0007030	Golgi organization	139	-0.39092	-1.78404	3.37833e-05	0.00516821	0.00481152	3461	tags=41%, list=21%, signal=33%	9648/5594/85462/5205/27314/79895/26259/57584/5861/84272/10133/22796/9820/55666/51112/137886/9183/222068/26003/9321/83548/91949/51014/23122/3998/79659/10466/23015/60684/11196/23332/23271/5604/79591/9382/143187/1452/55014/157680/51361/64225/440270/116068/8615/54808/8874/9919/53407/57531/10142/64083/10565/9950/2804/22878/57511/55300	1:CTB	2			Whole PE	hsa05161	Hepatitis B	134	0.333113	1.56849	0.00103671	0.00764574	0.00516082	1917	tags=26%, list=14%, signal=23%	5291/2885/6655/3454/1871/8772/1959/5603/5970/3569/7097/3845/10000/7099/29110/7048/7040/207/7042/3576/6714/4790/3716/5894/64764/10488/6777/5605/6654/5594/4615/7534/1385/4089/6772	10:Monocyte	2			Whole PE	R-HSA-72737	Cap-dependent Translation Initiation	111	0.727058	2.93174	1e-10	2.82879e-09	2.30622e-09	3668	tags=86%, list=22%, signal=67%	6224/23521/6124/8669/9349/6218/6128/6160/6181/200916/6194/8668/6205/11224/7458/9669/10480/6129/8894/6143/9045/6209/6158/51386/6217/6132/6125/6161/1973/6135/8666/6152/6146/6123/6159/6202/6203/6137/6147/25873/6175/8667/6167/6176/6154/6157/6208/6139/6165/6155/26986/6141/6230/6193/6207/6206/7311/6229/6133/6138/6189/6142/8892/6169/6222/6171/6210/6233/6144/6168/6188/4736/6228/6201/6122/6227/6130/6232/6…	1:CTB	4
Whole PE	GO:0009165	nucleotide biosynthetic process	252	0.37639	1.68194	3.63281e-05	0.0054546	0.00507815	4248	tags=41%, list=26%, signal=31%	125061/527/283120/11332/6241/515/26289/80308/111/55967/4725/30968/4831/3615/9524/204/2987/4830/23475/353/4718/272/4696/790955/10476/9551/4880/54981/100/2023/509/10135/521/23057/4860/38/7378/5166/471/441024/4700/196883/539/1854/47/4837/7372/55191/514/51079/4712/8564/4715/55811/4710/122481/4728/516/7415/10632/4709/4731/158/3614/51144/65990/1635/518/4704/10891/4717/6392/226/2180/790/4722/7040/4720/5…	1:CTB	2			Whole PE	hsa04520	Adherens junction	83	0.380544	1.66959	0.00115264	0.00795691	0.00537085	2597	tags=40%, list=19%, signal=32%	5797/2260/5795/387/1495/5879/9475/7048/83605/4233/6714/1499/5908/103910/57154/1459/8826/5770/5594/3480/998/4089/1956/2241/5880/2033/64750/1500/2534/6093/6932/4636/11235	10:Monocyte	2			Whole PE	R-HSA-2408522	Selenoamino acid metabolism	101	0.727585	2.90307	1e-10	2.82879e-09	2.30622e-09	2657	tags=76%, list=16%, signal=64%	6224/23521/6124/191/9349/6218/6128/6160/6181/200916/6194/6205/11224/6129/6143/1491/9045/6209/6158/7965/9255/6217/6132/6125/6161/6135/9521/6152/6146/6123/6159/6202/6203/6137/6147/25873/6175/6167/6176/6154/6157/6208/6139/6165/6155/6141/6230/6193/6207/6206/7311/4837/6229/6133/6138/6189/6142/6169/6222/6171/6210/6233/6144/6168/6188/4736/6228/6201/6122/6227/6130/6232/6156/6164/6187/2197/6223	1:CTB	4
Whole PE	GO:0046390	ribose phosphate biosynthetic process	201	0.388333	1.69021	3.84762e-05	0.00567209	0.00528063	4907	tags=48%, list=30%, signal=34%	527/283120/11332/515/26289/111/55967/4725/30968/4831/3615/9524/204/4830/353/4718/272/4696/790955/10476/9551/4880/100/2023/509/521/38/7378/5166/471/4700/196883/539/47/7372/514/51079/4712/4715/55811/4710/4728/516/7415/10632/4709/4731/158/3614/51144/65990/518/4704/10891/4717/6392/226/2180/790/4722/7040/4720/54963/4726/79071/4706/51703/109/4702/84277/4701/4833/10201/4695/522/55902/517/4708/513/5836/4…	1:CTB	2			Whole PE	hsa04660	T cell receptor signaling pathway	104	0.338089	1.54653	0.00198278	0.0127619	0.00861419	1622	tags=23%, list=12%, signal=20%	5291/1326/2885/6655/387/5603/5970/3845/8440/10000/207/10298/4790/5528/3702/5530/84433/5894/5533/55012/5529/5605/6654/5594	10:Monocyte	2			Whole PE	R-HSA-9633012	Response of EIF2AK4 (GCN2) to amino acid deficiency	94	0.727484	2.86996	1e-10	2.82879e-09	2.30622e-09	3261	tags=85%, list=20%, signal=68%	6224/23521/6124/9349/6218/6128/6160/1051/6181/200916/6194/6205/11224/6129/8894/6143/9045/6209/6158/6217/6132/6125/6161/6135/6152/6146/6123/6159/6202/6203/6137/6147/25873/6175/6167/6176/6154/6157/6208/6139/6165/6155/6141/6230/6193/6207/6206/7311/6229/6133/6138/6189/6142/6169/6222/6171/6210/6233/6144/6168/6188/4736/6228/6201/6122/6227/6130/6232/6156/6164/6187/2197/6223/1649/6235/467/51121/6234/6136…	1:CTB	4
Whole PE	GO:0006413	translational initiation	109	0.451136	1.81699	5.99434e-05	0.00837967	0.00780134	4424	tags=48%, list=27%, signal=35%	23521/3315/8669/219402/6218/8668/7458/9669/10480/8894/4869/51386/22927/1973/5436/8666/9470/317649/6352/8667/5936/10209/6193/8872/23645/6189/8892/6188/51247/28969/8562/8662/1979/3692/9689/8664/1981/57409/10605/1977/10987/8637/1965/8890/27335/100127983/10657/1975/5499/8893/6059/3646	1:CTB	2			Whole PE	hsa04517	IgSF CAM signaling	225	0.278666	1.43499	0.00197149	0.0127619	0.00861419	1637	tags=19%, list=12%, signal=17%	5291/2885/3688/10552/382/23085/2260/387/84617/7204/23607/23136/5879/8828/5603/9414/10109/57522/4637/8440/10000/1796/203068/207/56253/3684/6714/10298/1499/8832/5908/4067/103910/6504/3678/9693/8826/942/9788/5605/941/5594/5376	10:Monocyte	2			Whole PE	R-HSA-927802	Nonsense-Mediated Decay (NMD)	107	0.702276	2.81647	1e-10	2.82879e-09	2.30622e-09	2657	tags=72%, list=16%, signal=61%	6224/23521/6124/9349/6218/6128/5518/6160/6181/200916/6194/6205/11224/9939/6129/6143/9045/6209/6158/6217/6132/6125/6161/6135/9775/6152/6146/6123/6159/2935/6202/6203/6137/6147/4116/25873/6175/6167/6176/6154/6157/6208/6139/6165/6155/26986/6141/6230/6193/6207/6206/7311/6229/6133/6138/6189/6142/6169/6222/6171/6210/6233/6144/6168/6188/4736/6228/6201/6122/6227/6130/6232/6156/6164/6187/2197/6223	1:CTB	4
Whole PE	GO:0009617	response to bacterium	472	0.314254	1.47178	8.57703e-05	0.0115904	0.0107905	4713	tags=35%, list=29%, signal=26%	11145/23521/1365/2920/10221/1535/567/949/2150/1051/27063/2643/7132/664/387/5595/5225/2919/9516/7538/4282/9636/6767/2921/55765/2353/9466/3297/81929/51510/4258/3576/6992/9572/8140/5914/51316/1439/4016/7474/153090/4793/706/2634/161145/3661/4091/246778/51561/3606/7942/57506/2048/948/4067/5919/6590/3552/11334/3394/196/6464/59307/7425/10935/54/29126/23658/9450/834/2635/8564/837/3587/842/148022/84166/57…	1:CTB	2			Whole PE	hsa05135	Yersinia infection	124	0.334103	1.54623	0.00252841	0.0157028	0.0105993	797	tags=19%, list=6%, signal=18%	5291/3688/10552/382/387/147179/5879/5603/10109/9475/5970/3569/10000/7099/29110/114548/6196/207/3576/6347/3606/6714/4790	10:Monocyte	2			Whole PE	R-HSA-975957	Nonsense Mediated Decay (NMD) enhanced by the Exon Junction Complex (EJC)	107	0.702276	2.81647	1e-10	2.82879e-09	2.30622e-09	2657	tags=72%, list=16%, signal=61%	6224/23521/6124/9349/6218/6128/5518/6160/6181/200916/6194/6205/11224/9939/6129/6143/9045/6209/6158/6217/6132/6125/6161/6135/9775/6152/6146/6123/6159/2935/6202/6203/6137/6147/4116/25873/6175/6167/6176/6154/6157/6208/6139/6165/6155/26986/6141/6230/6193/6207/6206/7311/6229/6133/6138/6189/6142/6169/6222/6171/6210/6233/6144/6168/6188/4736/6228/6201/6122/6227/6130/6232/6156/6164/6187/2197/6223	1:CTB	4
Whole PE	GO:2001243	negative regulation of intrinsic apoptotic signaling pathway	92	0.455015	1.78861	9.935e-05	0.0127862	0.0119037	4656	tags=49%, list=29%, signal=35%	3315/8531/2907/7009/5478/1191/83787/4282/6880/6615/7178/3301/2023/972/754/10399/11315/8996/51060/1032/51079/10131/54929/9479/9709/637/4193/4722/5831/7494/7417/55829/207/5329/10625/84447/27429/51499/80237/219790/57007/26155/3065/4780/10525	1:CTB	2			Whole PE	hsa04380	Osteoclast differentiation	121	0.331218	1.52823	0.00269286	0.0161572	0.010906	2291	tags=34%, list=17%, signal=28%	5291/2885/489/126014/3454/5879/5603/3554/10859/5970/3455/10000/7048/4286/7040/11006/207/7042/140885/4790/3716/5530/5971/3553/5533/3552/1535/2213/11027/6850/10990/5594/2214/1385/6772/5532/7132/5599/3460/11025/5468	10:Monocyte	2			Whole PE	R-HSA-72649	Translation initiation complex formation	54	0.703982	2.51322	1e-10	2.82879e-09	2.30622e-09	4466	tags=91%, list=27%, signal=66%	6224/8669/6218/6194/8668/6205/7458/10480/8894/6209/51386/6217/1973/8666/6202/6203/8667/6208/26986/6230/6193/6207/6206/6229/6189/6222/6210/6233/6188/6228/6201/6227/6232/6187/2197/6223/8662/6235/8664/6234/51065/1981/6204/1977/1965/27335/1975/3646/3921	1:CTB	4
Whole PE	GO:0044782	cilium organization	331	-0.291179	-1.47734	0.000103023	0.0128509	0.011964	3464	tags=31%, list=21%, signal=25%	84747/54768/8195/84100/22873/79846/5991/57562/85462/9662/84223/7016/80216/26259/9474/22920/1874/57539/4739/10309/167691/54903/317662/57096/9851/80210/2909/92344/161502/4134/387707/55036/51057/5314/200162/4750/136332/10096/23386/401024/54874/989/27185/63917/123016/54806/153241/79659/27241/2932/23268/80321/23116/26146/144132/84058/150082/57787/54970/5108/91147/10464/4735/57560/202018/117178/118491/…	1:CTB	2			Whole PE	hsa03272	Virion - Hepatitis viruses	32	0.484943	1.74257	0.0033527	0.0188178	0.0127019	2818	tags=38%, list=21%, signal=30%	967/975/5119/7251/3916/91782/1364/9525/1956/29082/10015/128866	10:Monocyte	2			Whole PE	R-HSA-72695	Formation of the ternary complex, and subsequently, the 43S complex	47	0.724647	2.50961	1e-10	2.82879e-09	2.30622e-09	3261	tags=81%, list=20%, signal=65%	6224/8669/6218/6194/8668/6205/10480/8894/6209/51386/6217/8666/6202/6203/8667/6208/6230/6193/6207/6206/6229/6189/6222/6210/6233/6188/6228/6201/6227/6232/6187/2197/6223/8662/6235/8664/6234/51065	1:CTB	4
Whole PE	GO:0071826	protein-RNA complex organization	197	0.375993	1.63244	0.000136074	0.0163682	0.0152386	3456	tags=38%, list=21%, signal=30%	23521/4809/8669/6128/23246/8668/3326/6629/10480/10856/6633/8894/51154/6209/83443/6632/51386/6880/51639/6634/6637/6125/6135/26523/27341/6636/8666/10907/6627/10713/6152/54475/6147/6175/1207/8667/6631/3320/6208/6193/6606/6895/8996/10728/29777/51081/6169/25804/6635/55052/55011/55299/23212/7415/6232/6628/56949/8562/22827/6223/8662/26121/8607/3692/84231/25980/27339/8664/6234/51065/9326/26747/55702/5634…	1:CTB	2			Whole PE	hsa04657	IL-17 signaling pathway	66	0.384047	1.6041	0.0035084	0.0188178	0.0127019	978	tags=26%, list=7%, signal=24%	5598/10758/8772/5603/5597/2919/5970/3569/2920/2921/29110/3576/6347/4790/7184/6354/3553	10:Monocyte	2			Whole PE	R-HSA-72702	Ribosomal scanning and start codon recognition	54	0.695102	2.48152	1e-10	2.82879e-09	2.30622e-09	4466	tags=89%, list=27%, signal=65%	6224/8669/6218/6194/8668/6205/7458/10480/8894/6209/51386/6217/1973/8666/6202/6203/8667/6208/6230/6193/6207/6206/6229/6189/6222/6210/6233/6188/6228/6201/6227/6232/6187/2197/6223/8662/6235/8664/6234/51065/1981/6204/1977/1965/27335/1975/3646/3921	1:CTB	4
Whole PE	GO:0050900	leukocyte migration	308	0.33967	1.54442	0.000137277	0.0163682	0.0152386	2201	tags=22%, list=13%, signal=19%	23521/2920/5879/301/1265/1588/5155/5228/2150/6846/5478/3675/387/5595/430/2919/1803/4282/9255/3162/2921/7784/9466/3958/998/3576/51119/9750/5025/7422/3383/100/5764/1230/7474/6352/1843/8772/1652/50512/51561/80024/3204/7226/972/5881/58515/57580/4067/5919/3554/3552/56253/80270/23765/101/2321/51192/6793/3689/2650/5479/54795/6375/7852/83700/708	1:CTB	2			Whole PE	hsa05210	Colorectal cancer	83	0.359614	1.57776	0.0034674	0.0188178	0.0127019	2206	tags=30%, list=16%, signal=25%	5291/2885/2069/6655/387/5900/5879/5898/3845/10000/7048/7040/207/7042/1499/5894/5605/6654/5594/4089/1956/4609/5599/578/5880	10:Monocyte	2			Whole PE	R-HSA-9754678	SARS-CoV-2 modulates host translation machinery	47	0.713538	2.47114	1.20636e-10	3.12816e-09	2.55029e-09	3662	tags=83%, list=22%, signal=65%	6224/6218/6194/6205/6633/6209/6632/6217/6634/6637/6636/6202/6203/6208/6230/6193/6207/6606/6206/6229/6189/6222/6635/6210/6233/6188/6228/6201/6227/6232/6628/6187/2197/6223/6235/6234/51065/79833/6204	1:CTB	4
Whole PE	GO:0022618	protein-RNA complex assembly	189	0.383607	1.65576	0.000154049	0.0174709	0.0162651	3456	tags=39%, list=21%, signal=31%	23521/4809/8669/6128/23246/8668/3326/6629/10480/10856/6633/8894/51154/6209/83443/6632/51386/6880/51639/6634/6637/6125/6135/26523/27341/6636/8666/10907/6627/10713/6152/54475/6147/6175/1207/8667/6631/3320/6208/6193/6606/6895/8996/10728/29777/51081/6169/25804/6635/55052/55011/55299/23212/6232/6628/56949/8562/22827/6223/8662/26121/8607/3692/84231/25980/27339/8664/6234/51065/9326/26747/55702/56342/798…	1:CTB	2			Whole PE	hsa04670	Leukocyte transendothelial migration	89	0.352396	1.57849	0.0038389	0.0196952	0.0132941	1238	tags=20%, list=9%, signal=19%	5291/3688/387/1495/5879/6494/5603/9475/399/3684/1499/3702/5908/103910/2770/1535/394/1364	10:Monocyte	2			Whole PE	R-HSA-9735869	SARS-CoV-1 modulates host translation machinery	34	0.765929	2.48098	7.62817e-10	1.65602e-08	1.3501e-08	3261	tags=91%, list=20%, signal=73%	6224/6218/1915/6194/6205/6209/6217/6202/6203/3178/6208/6230/6193/6207/6206/6229/6189/6222/6210/6233/6188/6228/6201/6227/6232/6187/2197/6223/6235/6234/51065	1:CTB	4
Whole PE	GO:0006935	chemotaxis	351	0.328193	1.50026	0.000197166	0.021315	0.0198439	3964	tags=32%, list=24%, signal=25%	10663/23521/2920/112616/5879/3315/6275/301/1588/5155/5228/2150/6846/5478/387/5595/1890/2919/1803/4282/2921/3958/9732/55848/3576/51119/9750/5025/7422/8061/5872/5764/1230/7474/6352/1843/1652/51561/80024/7226/5898/972/8817/5881/56920/57580/4067/5919/25960/80270/7162/23765/101/2321/10928/51192/391/3689/1960/51554/9423/5328/5479/54795/6375/7852/4046/83700/708/57402/1238/6480/25865/3148/284114/1969/533…	1:CTB	2			Whole PE	hsa05020	Prion disease	215	-0.322785	-1.4301	0.00509778	0.0250641	0.0169181	2302	tags=27%, list=17%, signal=23%	5706/4701/4710/6261/515/7124/1958/10376/3305/5683/5685/4725/498/6647/27089/653361/7381/5296/4704/1340/5684/1350/522/29796/4717/4731/4723/90550/1965/4706/126328/5691/4712/4688/4689/4707/4705/1649/517/6390/9451/4695/4722/5705/509/4711/842/4709/4696/4716/3708/539/9586/3303/3304/3310/3312/10963	10:Monocyte	2			Whole PE	R-HSA-156842	Eukaryotic Translation Elongation	86	0.769394	3.61857	1e-10	6.49643e-09	4.96241e-09	2645	tags=85%, list=17%, signal=71%	1936/6224/6124/6129/6152/6136/9349/6206/6194/6161/6159/6230/6125/6143/6176/6207/6147/6128/6146/6205/6156/23521/6209/6189/6154/25873/1933/6227/6193/6175/6165/9045/6208/6181/6137/6210/6132/6135/1915/6204/6167/200916/6155/6141/4736/6228/6233/6201/6229/6203/6123/1937/6164/6160/6138/6171/6142/11224/6222/6202/6169/6139/6232/6133/2197/51121/6168/7311/6217/6234/6166/6144/6235	4:CTB-2	4
Whole PE	GO:0042330	taxis	351	0.328193	1.50026	0.000197166	0.021315	0.0198439	3964	tags=32%, list=24%, signal=25%	10663/23521/2920/112616/5879/3315/6275/301/1588/5155/5228/2150/6846/5478/387/5595/1890/2919/1803/4282/2921/3958/9732/55848/3576/51119/9750/5025/7422/8061/5872/5764/1230/7474/6352/1843/1652/51561/80024/7226/5898/972/8817/5881/56920/57580/4067/5919/25960/80270/7162/23765/101/2321/10928/51192/391/3689/1960/51554/9423/5328/5479/54795/6375/7852/4046/83700/708/57402/1238/6480/25865/3148/284114/1969/533…	1:CTB	2			Whole PE	hsa04668	TNF signaling pathway	103	0.322166	1.46984	0.00525957	0.0255053	0.0172159	1842	tags=23%, list=14%, signal=20%	5291/1326/8772/5603/2919/5970/3569/2920/10000/2921/207/6347/6868/4790/10059/329/3553/64764/10488/7128/4217/5594/3659/1385	10:Monocyte	2			Whole PE	R-HSA-72764	Eukaryotic Translation Termination	86	0.758202	3.56593	1e-10	6.49643e-09	4.96241e-09	2649	tags=85%, list=17%, signal=71%	6224/6124/6129/6152/51504/6136/9349/6206/6194/6161/6159/6230/6125/6143/6176/6207/6147/6128/6146/6205/6156/23521/327/6209/6189/6154/25873/6227/6193/6175/6165/9045/6208/6181/6137/6210/6132/6135/6204/6167/200916/6155/6141/4736/6228/6233/6201/6229/6203/6123/6164/6160/6138/6171/6142/11224/6222/6202/2107/6169/6139/6232/6133/2197/51121/6168/7311/6217/6234/6166/6144/6235/29104	4:CTB-2	4
Whole PE	GO:1990868	response to chemokine	61	0.50228	1.82801	0.00031738	0.0306347	0.0285205	4691	tags=46%, list=29%, signal=33%	10663/2296/2920/6846/387/2919/2921/3576/9750/1230/6352/1843/4067/51554/6375/7852/1238/10019/6586/11240/1906/6348/80149/10519/57007/1236/6558/1232	1:CTB	2			Whole PE	hsa05160	Hepatitis C	123	0.313607	1.45178	0.00610126	0.0291871	0.0197011	2184	tags=28%, list=16%, signal=23%	5291/2885/975/6655/3454/1871/8772/7531/5970/3455/3845/10000/29110/207/5610/7533/4790/1499/3716/5894/1364/5605/6654/4599/6256/5594/7534/5465/6772/1956/4609/7132/578/1019	10:Monocyte	2			Whole PE	R-HSA-72689	Formation of a pool of free 40S subunits	94	0.733031	3.50979	1e-10	6.49643e-09	4.96241e-09	2645	tags=80%, list=17%, signal=67%	6224/8668/6124/6129/6152/6136/9349/6206/6194/6161/6159/6230/6125/6143/6176/6207/6147/6128/6146/6205/6156/23521/6209/6189/6154/25873/8667/8669/6227/6193/6175/6165/9045/6208/6181/6137/8666/6210/6132/6135/6204/6167/200916/6155/6141/4736/6228/6233/6201/6229/51386/6203/6123/6164/10480/6160/6138/6171/6142/11224/6222/6202/6169/6139/6232/6133/2197/51121/6168/7311/6217/6234/6166/6144/6235	4:CTB-2	4
Whole PE	GO:1990869	cellular response to chemokine	61	0.50228	1.82801	0.00031738	0.0306347	0.0285205	4691	tags=46%, list=29%, signal=33%	10663/2296/2920/6846/387/2919/2921/3576/9750/1230/6352/1843/4067/51554/6375/7852/1238/10019/6586/11240/1906/6348/80149/10519/57007/1236/6558/1232	1:CTB	2			Whole PE	hsa04120	Ubiquitin mediated proteolysis	127	0.306777	1.42887	0.00709023	0.032898	0.0222059	2507	tags=35%, list=18%, signal=29%	23291/3093/23327/64326/4193/996/867/55236/7325/7318/8454/329/9616/29945/57154/7337/7332/246184/6500/55958/92912/997/51529/7322/9354/10277/10401/8945/5071/9817/1161/868/51343/51588/8452/7428/23295/51465/6477/4214/9690/64750/118424/84447	10:Monocyte	2			Whole PE	R-HSA-156902	Peptide chain elongation	83	0.765742	3.49857	1e-10	6.49643e-09	4.96241e-09	2645	tags=84%, list=17%, signal=70%	6224/6124/6129/6152/6136/9349/6206/6194/6161/6159/6230/6125/6143/6176/6207/6147/6128/6146/6205/6156/23521/6209/6189/6154/25873/6227/6193/6175/6165/9045/6208/6181/6137/6210/6132/6135/1915/6204/6167/200916/6155/6141/4736/6228/6233/6201/6229/6203/6123/6164/6160/6138/6171/6142/11224/6222/6202/6169/6139/6232/6133/2197/51121/6168/7311/6217/6234/6166/6144/6235	4:CTB-2	4
Whole PE	GO:0000209	protein polyubiquitination	203	-0.324918	-1.569	0.000316448	0.0306347	0.0285205	2808	tags=31%, list=17%, signal=26%	10346/57154/10425/7187/90678/54765/91445/84078/54542/6047/55128/246330/1643/117854/23328/80829/81847/80351/6049/54476/4734/1499/6502/54467/51433/25831/26272/80254/26118/9320/27246/51366/329/9604/9666/29945/23219/57542/7189/9354/55284/26249/9690/7325/223082/865/23291/81545/57531/7267/996/27252/7188/267/8945/257218/64839/7337/9781/8658/154214/387921	1:CTB	2			Whole PE	hsa04664	Fc epsilon RI signaling pathway	54	0.398499	1.59	0.00727896	0.0330062	0.0222789	1622	tags=28%, list=12%, signal=25%	5291/2885/6655/241/5879/5603/3845/10000/207/5894/4067/6850/5605/6654/5594	10:Monocyte	2			Whole PE	R-HSA-2408557	Selenocysteine synthesis	86	0.739143	3.47629	1e-10	6.49643e-09	4.96241e-09	2645	tags=81%, list=17%, signal=68%	6224/6124/6129/6152/6136/9349/6206/6194/6161/6159/6230/6125/6143/6176/6207/6147/6128/6146/6205/6156/23521/6209/6189/6154/25873/6227/6193/6175/6165/9045/6208/6181/6137/6210/6132/6135/6204/6167/200916/6155/6141/118672/4736/6228/6233/6201/6229/6203/6123/6164/6160/6138/6171/6142/11224/6222/6202/6169/6139/6232/6133/2197/51121/6168/7311/6217/6234/6166/6144/6235	4:CTB-2	4
Whole PE	GO:0097529	myeloid leukocyte migration	178	0.38061	1.6323	0.000387883	0.0353366	0.0328978	2290	tags=24%, list=14%, signal=21%	23521/2920/5879/301/1265/1588/5155/5228/6846/5478/5595/2919/1803/4282/2921/3958/3576/9750/5025/7422/1230/6352/1843/1652/51561/972/5881/58515/57580/4067/5919/3554/3552/23765/101/2321/51192/3689/5479/6375/83700/708/57402	1:CTB	2			Whole PE	hsa04510	Focal adhesion	165	-0.452293	-1.80064	9.92148e-06	0.000704425	0.000490852	2544	tags=41%, list=20%, signal=34%	5594/7057/1277/10398/896/5154/10000/3265/5170/103910/2317/1278/8394/54776/2909/3911/7094/3480/857/394/5295/29780/87/5908/93408/60/10298/5728/5894/55742/9564/6093/5747/207/10627/7410/5599/208/858/3611/2064/1284/25759/4638/3675/1282/6655/3082/3912/894/81/5602/1793/5228/5290/4659/6654/7448/9475/7414/3910/4660/3680/10319/3908/3915/2321/3672	13:Fibroblast	2			Whole PE	R-HSA-975956	Nonsense Mediated Decay (NMD) independent of the Exon Junction Complex (EJC)	88	0.719106	3.42701	1e-10	6.49643e-09	4.96241e-09	2645	tags=80%, list=17%, signal=66%	6224/6124/6129/6152/6136/9349/6206/6194/6161/6159/6230/6125/6143/6176/6207/6147/6128/6146/6205/6156/23521/6209/6189/6154/25873/6227/6193/6175/6165/9045/6208/6181/6137/6210/6132/6135/6204/6167/200916/6155/6141/4736/6228/6233/6201/6229/6203/6123/6164/6160/6138/6171/6142/11224/6222/6202/2107/6169/6139/6232/6133/2197/51121/6168/7311/6217/6234/6166/6144/6235	4:CTB-2	4
Whole PE	GO:1902600	proton transmembrane transport	123	0.402754	1.64198	0.000470224	0.0414411	0.038581	4290	tags=48%, list=26%, signal=36%	527/515/6553/7388/10476/9551/481/509/476/521/81031/50617/1340/8992/9550/84334/440400/27069/539/10063/285641/514/1528/529/9377/51382/516/90423/10632/1329/6834/4697/1497/1327/9296/7351/29796/83733/65990/518/11261/9167/526/11331/7350/121260/79751/533/1351/535/1815/54997/522/517/513/285335/374291/534/479	1:CTB	2			Whole PE	hsa05146	Amoebiasis	71	-0.527015	-1.8598	5.78823e-05	0.00183533	0.00127888	2124	tags=37%, list=16%, signal=31%	1278/5566/3911/2776/5295/2774/87/5567/5272/2767/5747/5869/1281/1284/1282/7042/3912/81/5290/7414/3910/10319/3908/23236/3915/7043	13:Fibroblast	2			Whole PE	R-HSA-192823	Viral mRNA Translation	83	0.742926	3.39433	1e-10	6.49643e-09	4.96241e-09	2645	tags=83%, list=17%, signal=69%	6224/6124/6129/6152/6136/9349/6206/6194/6161/6159/6230/6125/6143/6176/6207/6147/6128/6146/6205/6156/23521/6209/6189/6154/25873/6227/6193/6175/6165/9045/6208/6181/6137/6210/6132/6135/6204/6167/200916/6155/6141/4736/6228/6233/6201/6229/6203/6123/6164/6160/6138/6171/6142/11224/6222/6202/6169/6139/6232/6133/2197/51121/6168/7311/6217/6234/6166/6144/6235	4:CTB-2	4
Whole PE	GO:0048588	developmental cell growth	196	-0.329105	-1.5851	0.000538461	0.0450087	0.0419024	3126	tags=32%, list=19%, signal=26%	9472/1002/9037/89780/66000/659/8482/7048/57154/57715/10425/23011/5532/10631/25942/118813/10507/5361/23394/8828/27185/6259/2803/57556/6049/2131/2932/1499/51199/6857/8153/3688/55364/23111/8904/22902/351/4092/80208/627/10371/9962/6416/81565/57698/10611/1946/4133/8829/144165/5048/440275/26999/65059/23767/8936/5465/23369/9706/80031/203228/214/23242	1:CTB	2			Whole PE	hsa04668	TNF signaling pathway	101	0.443152	1.85474	5.8661e-05	0.00183533	0.00127888	2064	tags=36%, list=16%, signal=30%	4217/9586/9021/3726/7187/90993/4323/1326/3659/2920/7185/1051/5606/7128/330/602/4792/197259/3976/3725/9020/4790/7412/3383/2919/7424/5291/329/6347/3627/468/6868/2353/5604/5743/7124	13:Fibroblast	2			Whole PE	R-HSA-156827	L13a-mediated translational silencing of Ceruloplasmin expression	103	0.71411	3.28183	1e-10	6.49643e-09	4.96241e-09	2645	tags=75%, list=17%, signal=63%	6224/8668/6124/6129/6152/6136/9349/6206/6194/6161/6159/6230/6125/6143/6176/6207/6147/6128/6146/6205/6156/23521/6209/6189/6154/25873/8667/8669/6227/6193/6175/6165/9045/6208/6181/6137/8666/6210/6132/7458/6135/6204/6167/200916/6155/6141/4736/8894/6228/6233/6201/6229/51386/6203/6123/6164/10480/6160/6138/6171/6142/11224/6222/6202/6169/6139/6232/6133/2197/51121/6168/7311/6217/6234/6166/6144/6235	4:CTB-2	4
Whole PE	GO:0016050	vesicle organization	326	-0.284549	-1.43636	0.000534403	0.0450087	0.0419024	3079	tags=30%, list=19%, signal=25%	5861/596/84272/64645/203062/11063/858/338382/91782/5007/7405/9842/10015/65977/26276/51112/1385/59349/26258/6844/5873/10947/137492/10239/54874/525/25825/8301/84364/23023/54809/1182/9847/23325/26286/80183/63971/8675/23317/10451/60684/6857/51606/9527/7110/80006/143187/399979/122553/55014/157680/9217/9892/51361/6622/728113/84079/89781/57679/80208/950/23315/23339/10564/8417/164/2060/10427/10497/64400/…	1:CTB	2			Whole PE	hsa04015	Rap1 signaling pathway	167	-0.432734	-1.72384	3.86346e-05	0.00183533	0.00127888	1917	tags=29%, list=15%, signal=25%	55740/7094/2776/3480/5584/5295/1500/2261/5908/60/10235/23683/9855/805/64411/6237/5894/9564/9223/207/4804/7410/208/26037/57568/1946/260425/3397/285/115/56288/5587/3082/2770/1902/9693/4803/5228/5290/84552/51196/51735/109/284/111/23236/2321/9771	13:Fibroblast	2			Whole PE	R-HSA-9633012	Response of EIF2AK4 (GCN2) to amino acid deficiency	94	0.683831	3.27422	1e-10	6.49643e-09	4.96241e-09	2645	tags=78%, list=17%, signal=65%	6224/1051/6124/6129/6152/6136/9349/6206/6194/6161/6159/6230/6125/6143/6176/6207/6147/6128/6146/6205/6156/1649/23521/6209/6189/6154/25873/6227/6193/6175/6165/9045/6208/6181/6137/6210/6132/6135/6204/6167/200916/6155/6141/4736/8894/6228/6233/6201/6229/6203/6123/6164/6160/6138/6171/6142/11224/6222/6202/6169/6139/6232/6133/2197/51121/467/6168/7311/6217/6234/6166/6144/6235	4:CTB-2	4
Whole PE	GO:0000077	DNA damage checkpoint signaling	117	-0.373153	-1.64849	0.00055345	0.0457895	0.0426293	2069	tags=29%, list=13%, signal=26%	80279/79968/60561/5591/1112/8720/545/26272/5884/80254/835/55159/57551/10116/8738/4436/25896/9575/675/1017/79621/23376/55367/57646/1386/83666/472/440275/26058/4683/51720/11073/1027/4361	1:CTB	2			Whole PE	hsa05169	Epstein-Barr virus infection	161	0.375637	1.69216	3.5669e-05	0.00183533	0.00127888	2147	tags=30%, list=16%, signal=25%	1026/9636/4616/1647/7187/4938/960/6890/8819/10379/5971/5606/3133/3106/7128/4792/3107/3115/595/7431/6773/4791/567/6772/3665/3725/9020/4790/3105/1643/4939/5610/1871/10018/3383/5291/3455/11047/54205/578/3280/3627/5718/5700/7124/4067/4794/3661	13:Fibroblast	2			Whole PE	R-HSA-72613	Eukaryotic Translation Initiation	111	0.677721	3.25744	1e-10	6.49643e-09	4.96241e-09	2645	tags=70%, list=17%, signal=59%	6224/8668/6124/6129/6152/6136/9349/6206/6194/6161/6159/6230/6125/6143/6176/6207/6147/6128/6146/6205/6156/23521/6209/6189/6154/25873/8667/8669/6227/6193/6175/6165/9045/6208/6181/6137/8666/6210/6132/7458/6135/6204/6167/200916/6155/6141/4736/8894/6228/6233/6201/6229/51386/6203/6123/6164/8892/10480/6160/6138/6171/6142/11224/6222/6202/6169/6139/6232/6133/2197/51121/6168/7311/6217/6234/6166/6144/6235	4:CTB-2	4
Whole PE	GO:0045746	negative regulation of Notch signaling pathway	36	0.566209	1.83293	0.000563103	0.0460346	0.0428575	3628	tags=53%, list=22%, signal=41%	441478/54567/9148/408/64855/56892/23493/23462/92714/1746/2624/3955/79094/604/65989/23555/207/84934/10683	1:CTB	2			Whole PE	hsa04517	IgSF CAM signaling	206	-0.409478	-1.67086	5.86098e-05	0.00183533	0.00127888	2544	tags=32%, list=20%, signal=26%	5594/5921/5802/10398/92154/9788/10000/5792/84612/25/5170/6709/103910/3932/4690/5962/5818/4637/5584/5295/2037/4008/87/5908/60/10298/25945/5376/8633/9564/8497/9223/5819/5747/207/10627/1445/6092/7410/9353/4916/5599/208/4629/5362/8777/4638/56288/10092/23085/5789/23705/81/5602/6586/9693/90952/5290/7082/7414/84552/288/51735/7430/8440/7225	13:Fibroblast	2			Whole PE	R-HSA-72737	Cap-dependent Translation Initiation	111	0.677721	3.25744	1e-10	6.49643e-09	4.96241e-09	2645	tags=70%, list=17%, signal=59%	6224/8668/6124/6129/6152/6136/9349/6206/6194/6161/6159/6230/6125/6143/6176/6207/6147/6128/6146/6205/6156/23521/6209/6189/6154/25873/8667/8669/6227/6193/6175/6165/9045/6208/6181/6137/8666/6210/6132/7458/6135/6204/6167/200916/6155/6141/4736/8894/6228/6233/6201/6229/51386/6203/6123/6164/8892/10480/6160/6138/6171/6142/11224/6222/6202/6169/6139/6232/6133/2197/51121/6168/7311/6217/6234/6166/6144/6235	4:CTB-2	4
Whole PE	GO:0010975	regulation of neuron projection development	380	-0.275179	-1.40691	0.000567767	0.0460346	0.0428575	3187	tags=28%, list=20%, signal=23%	22943/26259/1601/6695/1002/9037/22871/89780/2033/659/8837/23258/9820/8482/26115/4139/57154/57715/2909/23072/23011/1000/118813/23077/10507/3655/5361/8036/23394/5793/4038/116983/4076/27185/5530/26153/112/57554/6259/9139/2803/23189/26039/57556/6049/29904/5754/2932/4734/2242/51199/4756/6091/8153/23271/5604/23111/5780/22902/8578/2185/10152/26037/54986/23043/9860/84079/950/627/10371/8850/55714/120114/8…	1:CTB	2			Whole PE	hsa04657	IL-17 signaling pathway	62	0.493781	1.90107	0.000139543	0.002914	0.00203051	2064	tags=39%, list=16%, signal=33%	7187/2920/3576/1051/7128/4792/6356/2354/8061/3727/3320/132014/3725/4790/6426/3326/2919/9618/6347/23765/3627/2353/5743/7124	13:Fibroblast	2			Whole PE	R-HSA-72706	GTP hydrolysis and joining of the 60S ribosomal subunit	104	0.706425	3.25286	1e-10	6.49643e-09	4.96241e-09	2645	tags=74%, list=17%, signal=62%	6224/8668/6124/6129/6152/6136/9349/6206/6194/6161/6159/6230/6125/6143/6176/6207/6147/6128/6146/6205/6156/23521/6209/6189/6154/25873/8667/8669/6227/6193/6175/6165/9045/6208/6181/6137/8666/6210/6132/7458/6135/6204/6167/200916/6155/6141/4736/8894/6228/6233/6201/6229/51386/6203/6123/6164/10480/6160/6138/6171/6142/11224/6222/6202/6169/6139/6232/6133/2197/51121/6168/7311/6217/6234/6166/6144/6235	4:CTB-2	4
Whole PE	GO:0017004	cytochrome complex assembly	35	0.669789	2.15148	1.66245e-06	0.000408458	0.000380268	2374	tags=54%, list=15%, signal=46%	79064/1535/389203/388753/51287/84275/790955/55744/493753/6341/617/28958/84300/84334/9997/10063/100131801/79072/6834	1:CTB	1			Whole PE	hsa05160	Hepatitis C	116	0.39177	1.68205	0.000329166	0.00478237	0.00333242	1363	tags=25%, list=10%, signal=23%	1026/4600/9021/7187/4599/4938/10379/3434/4792/595/91543/6773/6772/3665/1956/4790/9451/4939/5610/1871/9069/7532/5605/3845/949/148022/5291/10971/3455	13:Fibroblast	2			Whole PE	R-HSA-1799339	SRP-dependent cotranslational protein targeting to membrane	105	0.687756	3.21924	1e-10	6.49643e-09	4.96241e-09	2645	tags=75%, list=17%, signal=63%	6224/90701/6124/6129/6152/6136/9349/6206/6194/6161/6159/6230/6125/6143/6176/6207/6147/6128/6727/6146/6205/6156/28972/23521/6209/6189/6154/25873/6227/6193/6175/6165/9045/6208/6181/6137/6210/6132/6135/6204/6167/6746/200916/6155/6747/6141/4736/6228/6233/6184/6201/6229/6203/6123/6164/6160/6138/6171/6142/11224/6222/6202/6169/6139/6232/23480/6133/2197/51121/23478/6168/29927/7311/6217/6234/6728/6166/614…	4:CTB-2	4
Whole PE	GO:0006091	generation of precursor metabolites and energy	415	0.349465	1.61548	3.05519e-06	0.000688096	0.000640607	4574	tags=44%, list=28%, signal=33%	5315/1535/3939/1588/79085/515/8870/664/54541/6888/387/55967/388753/4725/3099/1534/30968/2997/3098/160428/2821/2597/6472/8659/37/2395/84275/4718/4696/5447/7388/790955/114789/9572/7381/10476/9551/2023/51103/509/521/51548/3481/38/1340/6774/23596/84300/84334/27069/4700/8574/539/5507/1347/9997/51142/27089/47/54205/11315/4776/10063/5018/10728/7425/4191/9945/144363/254013/514/51079/2203/5208/55847/4712/…	1:CTB	1			Whole PE	hsa04520	Adherens junction	84	-0.480963	-1.74304	0.000397919	0.00479173	0.00333894	2544	tags=39%, list=20%, signal=32%	5594/10398/1387/5792/103910/5818/3480/6885/1500/4008/87/5908/93408/60/9855/25945/4089/9411/6093/5819/10627/6934/2064/7046/51176/56288/81/57154/2241/7082/9475/7414/29119	13:Fibroblast	2			Whole PE	R-HSA-2408522	Selenoamino acid metabolism	100	0.675797	3.21124	1e-10	6.49643e-09	4.96241e-09	2645	tags=75%, list=17%, signal=63%	6224/6124/6129/6152/6136/9349/6206/6194/6161/6159/6230/6125/6143/6176/6207/6147/6128/191/6146/6205/6156/23521/6209/6189/6154/25873/9255/1491/6227/6193/6175/6165/9045/6208/6181/6137/6210/6132/6135/6204/6167/7965/200916/6155/6141/118672/4736/6228/6233/6201/6229/6203/6123/6164/6160/6138/6171/6142/11224/6222/6202/3176/6169/6139/6232/6133/2197/51121/6168/7311/6217/6234/6166/6144/6235	4:CTB-2	4
Whole PE	GO:0006164	purine nucleotide biosynthetic process	220	0.394891	1.74232	6.83824e-06	0.00132011	0.001229	4248	tags=41%, list=26%, signal=31%	125061/527/283120/11332/515/26289/111/55967/4725/30968/4831/3615/9524/204/2987/4830/23475/353/4718/272/4696/790955/10476/9551/4880/54981/100/2023/509/10135/521/23057/38/5166/471/441024/4700/196883/539/47/4837/55191/514/51079/4712/8564/4715/55811/4710/4728/516/7415/10632/4709/4731/158/3614/51144/65990/518/4704/10891/4717/6392/226/2180/4722/7040/4720/4726/79071/4706/51703/109/4702/84277/4701/4833/1…	1:CTB	1			Whole PE	hsa04310	Wnt signaling pathway	133	-0.426887	-1.65342	0.000428577	0.0049079	0.00341988	2509	tags=34%, list=19%, signal=28%	5331/8324/1387/896/7474/147495/5566/7482/6259/147111/1454/7090/6885/25805/324/5567/4089/5532/23291/817/6934/5599/79718/85407/55366/51176/8321/6422/1857/4776/5534/27130/894/8313/5602/84870/59352/4040/7475/9475/166336/89780/23500/7472/23236	13:Fibroblast	2			Whole PE	R-HSA-927802	Nonsense-Mediated Decay (NMD)	107	0.596388	2.79661	1e-10	6.49643e-09	4.96241e-09	3055	tags=73%, list=20%, signal=59%	6224/6124/6129/6152/6136/9349/6206/6194/6161/6159/5518/6230/6125/6143/6176/6207/6147/6128/6146/6205/6156/23521/6209/6189/6154/25873/6227/6193/6175/6165/9045/6208/6181/6137/6210/6132/6135/6204/6167/200916/6155/6141/4736/6228/6233/6201/6229/6203/6123/6164/6160/6138/6171/6142/11224/6222/6202/2107/6169/6139/6232/6133/2197/51121/6168/7311/6217/6234/6166/6144/6235/4116/1981/6158/6223/6188/9939/6130	4:CTB-2	4
Whole PE	GO:0060326	cell chemotaxis	239	0.382414	1.69783	1.44462e-05	0.0025463	0.00237057	4738	tags=41%, list=29%, signal=30%	10663/23521/2920/5879/3315/301/1588/5155/5228/2150/6846/5478/5595/2919/1803/4282/2921/3958/9732/3576/51119/9750/5025/7422/5872/5764/1230/7474/6352/1843/1652/51561/80024/7226/972/8817/5881/57580/4067/5919/80270/7162/23765/101/2321/51192/391/3689/1960/51554/5479/54795/6375/7852/83700/708/57402/1238/25865/3148/284114/1969/5339/6223/57449/5580/146433/692094/5293/51411/4851/7409/3146/682/11151/57175/1…	1:CTB	1			Whole PE	hsa05134	Legionellosis	47	0.524716	1.93684	0.00044618	0.00494981	0.00344909	1794	tags=36%, list=14%, signal=31%	3304/3303/2920/3576/4792/3312/3329/4791/4790/29108/664/2919/3297/834/7415/54205/718	13:Fibroblast	2			Whole PE	R-HSA-975957	Nonsense Mediated Decay (NMD) enhanced by the Exon Junction Complex (EJC)	107	0.596388	2.79661	1e-10	6.49643e-09	4.96241e-09	3055	tags=73%, list=20%, signal=59%	6224/6124/6129/6152/6136/9349/6206/6194/6161/6159/5518/6230/6125/6143/6176/6207/6147/6128/6146/6205/6156/23521/6209/6189/6154/25873/6227/6193/6175/6165/9045/6208/6181/6137/6210/6132/6135/6204/6167/200916/6155/6141/4736/6228/6233/6201/6229/6203/6123/6164/6160/6138/6171/6142/11224/6222/6202/2107/6169/6139/6232/6133/2197/51121/6168/7311/6217/6234/6166/6144/6235/4116/1981/6158/6223/6188/9939/6130	4:CTB-2	4
Whole PE	GO:0070585	protein localization to mitochondrion	122	0.445716	1.81483	2.36858e-05	0.00384089	0.00357581	3889	tags=45%, list=24%, signal=35%	7332/92609/9636/56993/3099/3098/401505/160140/131118/80273/51025/23770/3301/706/3320/728489/617/5898/57506/10469/9049/100188893/10440/26520/5018/59286/665/131474/51079/9141/23788/10456/26517/7323/93974/55811/29103/3329/9804/26521/22885/1649/54543/637/140823/23409/4580/79568/207/8314/79778/84134/10452/27429/55072	1:CTB	1			Whole PE	hsa04380	Osteoclast differentiation	99	0.402111	1.6804	0.000508411	0.00530841	0.00369896	1363	tags=26%, list=10%, signal=24%	4772/8878/9021/1513/3726/10379/5971/4792/4286/4982/2354/8061/6773/3727/4791/6772/4773/3725/9020/4790/1436/54/8651/5530/5291/3455	13:Fibroblast	2			Whole PE	R-HSA-72649	Translation initiation complex formation	54	0.654609	2.70585	1e-10	6.49643e-09	4.96241e-09	3264	tags=70%, list=21%, signal=56%	6224/8668/6206/6194/6230/6207/6205/6209/6189/8667/8669/6227/6193/6208/8666/6210/7458/6204/8894/6228/6233/6201/6229/51386/6203/10480/6222/6202/6232/2197/6217/6234/6235/1981/6223/6188/27335/6218	4:CTB-2	4
Whole PE	GO:0008535	respiratory chain complex IV assembly	27	0.654024	1.97205	5.36574e-05	0.00776883	0.00723266	2374	tags=56%, list=15%, signal=48%	79064/389203/388753/51287/55744/493753/6341/617/28958/84334/9997/10063/100131801/79072/6834	1:CTB	1			Whole PE	hsa04670	Leukocyte transendothelial migration	76	-0.47165	-1.67634	0.000704732	0.00714799	0.00498081	2428	tags=34%, list=19%, signal=28%	10398/6494/1366/103910/7852/2909/394/5295/1500/87/5908/93408/60/9564/6093/5747/10627/7410/2770/81/90952/5290/9475/7414/7430/29119	13:Fibroblast	2			Whole PE	R-HSA-72702	Ribosomal scanning and start codon recognition	54	0.643289	2.65906	2.30388e-10	1.33287e-08	1.01813e-08	3264	tags=70%, list=21%, signal=56%	6224/8668/6206/6194/6230/6207/6205/6209/6189/8667/8669/6227/6193/6208/8666/6210/7458/6204/8894/6228/6233/6201/6229/51386/6203/10480/6222/6202/6232/2197/6217/6234/6235/1981/6223/6188/27335/6218	4:CTB-2	4
Whole PE	GO:0030595	leukocyte chemotaxis	180	0.400444	1.71998	7.89063e-05	0.0108436	0.0100952	2851	tags=28%, list=17%, signal=24%	23521/2920/5879/301/1588/5155/5228/2150/6846/5478/5595/2919/1803/4282/2921/3958/3576/51119/9750/7422/5764/1230/7474/6352/1843/1652/51561/80024/7226/972/57580/4067/5919/80270/23765/101/2321/51192/3689/5479/54795/6375/7852/83700/708/57402/284114/5339/6223/146433/692094	1:CTB	1			Whole PE	hsa05167	Kaposi sarcoma-associated herpesvirus infection	152	0.34031	1.52203	0.00174081	0.0137331	0.00956936	1363	tags=24%, list=10%, signal=22%	1026/9976/4772/7187/7422/7538/2920/3576/10379/3133/3106/4792/3107/595/6773/9261/6772/4773/801/2790/3665/3725/4790/3105/5610/3091/1871/81631/5605/3383/3845/2919/5530/64422/148022/5291/3455	13:Fibroblast	2			Whole PE	R-HSA-72695	Formation of the ternary complex, and subsequently, the 43S complex	47	0.677999	2.74794	3.81005e-10	1.98014e-08	1.51256e-08	3264	tags=77%, list=21%, signal=61%	6224/8668/6206/6194/6230/6207/6205/6209/6189/8667/8669/6227/6193/6208/8666/6210/6204/8894/6228/6233/6201/6229/51386/6203/10480/6222/6202/6232/2197/6217/6234/6235/6223/6188/27335/6218	4:CTB-2	4
Whole PE	GO:0072655	establishment of protein localization to mitochondrion	117	0.437259	1.77637	8.74067e-05	0.0116179	0.0108161	3889	tags=44%, list=24%, signal=34%	7332/92609/56993/3099/3098/401505/160140/131118/80273/51025/3301/706/3320/728489/617/5898/10469/9049/100188893/10440/26520/5018/59286/665/131474/51079/9141/23788/10456/26517/7323/93974/55811/29103/3329/9804/26521/22885/1649/54543/637/140823/23409/4580/79568/207/8314/79778/84134/10452/27429/55072	1:CTB	1			Whole PE	hsa04620	Toll-like receptor signaling pathway	76	0.39902	1.6229	0.00226205	0.0154428	0.0107608	2147	tags=32%, list=16%, signal=27%	1513/7187/1326/3576/10379/5606/4792/23643/6773/6772/6348/3665/3725/4790/5605/148022/5291/3455/3627/353376/2353/5604/7124/3661	13:Fibroblast	2			Whole PE	R-HSA-9735869	SARS-CoV-1 modulates host translation machinery	34	0.734609	2.76122	6.30038e-10	3.09741e-08	2.366e-08	3005	tags=82%, list=19%, signal=67%	6224/6206/6194/6230/6207/6205/6209/6189/6227/6193/6208/6210/1915/6204/6228/6233/6201/6229/6203/6222/6202/6232/2197/6217/6234/6235/6223/6188	4:CTB-2	4
Whole PE	GO:0022900	electron transport chain	149	0.408956	1.71928	0.000103006	0.0128509	0.011964	4574	tags=54%, list=28%, signal=39%	1535/1588/55967/388753/4725/1534/8659/4718/4696/5447/7388/790955/7381/51103/1340/27069/4700/8574/1347/9997/51142/27089/54205/11315/144363/4712/1528/4715/9377/4710/6715/29103/4728/7385/4709/4731/1329/6834/4697/1327/10975/5339/29796/83733/1350/4835/4704/983/10891/637/4717/6392/57019/4722/9167/4720/4726/112812/26227/4706/79751/4702/4701/1351/4695/2230/2109/2108/1337/4708/4724/374291/1353/4716/4707/4…	1:CTB	1			Whole PE	hsa04935	Growth hormone synthesis, secretion and action	99	-0.424851	-1.57692	0.00263808	0.0167235	0.0116532	2544	tags=37%, list=20%, signal=30%	5594/5331/1387/10000/6777/3265/1388/5566/779/2776/5295/5567/2767/3486/2475/5894/9564/5747/207/5599/208/2690/25759/3708/115/4214/6655/775/2770/5602/3717/5290/6654/3709/109/111/23236	13:Fibroblast	2			Whole PE	R-HSA-9754678	SARS-CoV-2 modulates host translation machinery	47	0.638164	2.58649	1.29385e-08	4.77508e-07	3.64752e-07	3005	tags=70%, list=19%, signal=57%	6224/6633/6206/6194/6230/6207/6205/6209/6189/6637/6227/6193/6208/6210/6204/6228/6233/6201/6229/6203/6635/6222/6202/79760/6232/6636/2197/6217/6234/6235/6634/6223/6188	4:CTB-2	4
Whole PE	GO:0030490	maturation of SSU-rRNA	50	0.554775	1.96372	0.000141366	0.0166115	0.0154651	3871	tags=52%, list=24%, signal=40%	4809/55272/6217/6202/28987/6208/404672/29777/92856/11056/57050/23212/65095/6227/10799/57647/6223/705/84294/25983/6234/10199/2068/11157/10885/25879	1:CTB	1			Whole PE	hsa05203	Viral carcinogenesis	148	0.332518	1.47831	0.00289618	0.0177266	0.0123521	2700	tags=34%, list=21%, signal=27%	1026/9586/7187/90993/5315/1960/7185/10379/2934/3133/3106/4792/3107/595/1030/9734/9261/1029/4791/3665/3725/4790/3105/5922/5610/1959/7532/3845/79885/5291/10971/6776/578/6672/718/8841/468/5700/4067/3661/1019/983/7533/2033/10014/5970/55697/6774/572/1111	13:Fibroblast	2			Whole PE	R-HSA-72766	Translation	260	-0.521177	-2.38754	1e-10	8.895e-09	7.76316e-09	3356	tags=55%, list=25%, signal=42%	64432/29088/6209/57129/60488/55173/124995/1938/1937/8891/26986/122704/64960/9553/64969/54938/7965/2935/85476/6135/64978/6137/7311/51650/55699/51373/51263/6138/6147/51253/6729/8664/92399/5464/6234/29104/8667/51073/6133/6143/6189/64949/6201/6229/6222/6181/6202/64979/11224/6165/6132/10667/6235/1967/55052/65993/6227/79590/6156/327/6210/116541/6130/27335/6141/4736/6230/6157/6142/28977/6168/51386/6193/…	10:Monocyte	3
Whole PE	GO:0006892	post-Golgi vesicle-mediated transport	97	-0.415468	-1.77136	0.000155143	0.0174709	0.0162651	2485	tags=38%, list=15%, signal=33%	54536/6844/9522/10066/10239/55763/2803/57120/63971/9980/60412/23233/10791/143187/57020/11031/4905/10564/4430/164/583/2060/9135/10640/9919/288/55770/64083/23256/27252/54832/51542/54520/23041/23230/55297/23033	1:CTB	1			Whole PE	hsa01522	Endocrine resistance	82	-0.428243	-1.55062	0.00343973	0.0200181	0.0139489	1755	tags=29%, list=13%, signal=25%	3480/5295/5567/2100/2475/5894/9611/6667/5747/207/5599/4853/208/2064/25759/115/6655/5602/5290/6654/109/182/4854/111	13:Fibroblast	2			Whole PE	R-HSA-168273	Influenza Viral RNA Transcription and Replication	128	-0.570591	-2.35605	1e-10	8.895e-09	7.76316e-09	2865	tags=56%, list=21%, signal=45%	5438/10762/6135/6137/9688/5435/7311/79902/6138/6147/6234/9972/6133/6143/6189/4927/6201/6229/6222/6181/6202/8021/11224/6165/6132/6235/6227/6156/6210/6130/23636/6141/4736/6230/6157/6142/6168/6193/6167/4928/3921/6205/200916/25873/9045/6208/6154/6161/9631/6152/6207/6155/6125/23521/6146/23225/6187/6224/8086/6228/6159/9349/6218/6129/6136/5439/6169/6164/2926/6160/6124/3320	10:Monocyte	3
Whole PE	GO:0006626	protein targeting to mitochondrion	99	0.437835	1.72759	0.000166588	0.0185027	0.0172257	4018	tags=44%, list=25%, signal=34%	7332/92609/56993/401505/160140/131118/80273/51025/706/3320/728489/10469/9049/100188893/10440/26520/59286/665/131474/51079/9141/23788/10456/26517/7323/93974/55811/29103/3329/9804/26521/22885/54543/637/140823/23409/4580/8314/79778/84134/10452/27429/55072/26519	1:CTB	1			Whole PE	hsa04014	Ras signaling pathway	170	-0.367394	-1.46984	0.00379788	0.0210663	0.0146793	2361	tags=29%, list=18%, signal=24%	5154/10000/9462/3265/25/5566/6789/4763/57186/3480/5295/57148/59345/253959/2261/5908/10235/10298/5567/805/6237/5894/8315/2792/627/207/5869/4804/5599/208/5320/1946/25759/285/2114/3481/8605/6655/2549/3082/5602/4803/5228/5290/6654/51196/284/2321/9771/5322	13:Fibroblast	2			Whole PE	R-HSA-5368287	Mitochondrial translation	93	-0.585735	-2.29019	1e-10	8.895e-09	7.76316e-09	3356	tags=56%, list=25%, signal=42%	64432/29088/57129/60488/55173/124995/122704/64960/9553/64969/85476/64978/51650/51373/51263/51253/92399/51073/64949/64979/55052/65993/79590/116541/28977/92259/65080/64975/9801/64983/28957/65005/5018/64965/65003/23107/63931/51116/6150/51258/219402/11222/78988/29074/28998/54460/65008/7818/64976/55037/28973/64968	10:Monocyte	3
Whole PE	GO:1902622	regulation of neutrophil migration	37	0.578426	1.89932	0.00021656	0.0231035	0.021509	2201	tags=38%, list=13%, signal=33%	5879/1803/3576/9750/51561/972/5881/58515/3554/3552/101/6375/83700/708	1:CTB	1			Whole PE	hsa05100	Bacterial invasion of epithelial cells	71	-0.448974	-1.5844	0.00402905	0.0217471	0.0151536	1734	tags=27%, list=13%, signal=23%	857/5295/79658/60/1785/9564/5747/858/3611/25759/1213/10092/2549/3059/55752/1793/5290/7414/29119	13:Fibroblast	2			Whole PE	R-HSA-5368286	Mitochondrial translation initiation	87	-0.598884	-2.32573	1.4583e-10	1.23539e-08	1.07819e-08	3356	tags=57%, list=25%, signal=44%	64432/29088/57129/60488/55173/124995/122704/64960/9553/64969/64978/51650/51373/51263/51253/51073/64949/64979/55052/65993/79590/116541/28977/92259/65080/64975/9801/64983/28957/65005/5018/64965/65003/23107/63931/51116/6150/51258/219402/11222/78988/29074/28998/54460/65008/7818/64976/55037/28973/64968	10:Monocyte	3
Whole PE	GO:1901798	positive regulation of signal transduction by p53 class mediator	28	0.635332	1.9495	0.000241631	0.0251172	0.0233838	2217	tags=54%, list=14%, signal=46%	6224/9349/27063/7314/6209/10467/6135/9521/6167/6154/5371/4609/1984/6201/200734	1:CTB	1			Whole PE	hsa04810	Regulation of actin cytoskeleton	164	-0.372224	-1.48025	0.00405962	0.0217471	0.0151536	2544	tags=32%, list=20%, signal=26%	5594/10788/10398/5154/10000/3265/103910/5962/7852/8394/54776/8874/55740/2909/5295/2261/730/87/324/93408/60/10298/85477/6237/5894/9564/6093/5747/207/10627/1073/7410/208/4629/10787/4638/3675/10092/6655/23365/26999/1902/81/1793/5290/4659/6654/9475/7414/4660/7430/3680/3672	13:Fibroblast	2			Whole PE	R-HSA-5389840	Mitochondrial translation elongation	87	-0.59575	-2.31356	2.28777e-10	1.84997e-08	1.61457e-08	3356	tags=57%, list=25%, signal=44%	64432/29088/57129/60488/55173/124995/122704/64960/9553/64969/85476/64978/51650/51373/51263/51253/51073/64949/64979/55052/65993/79590/116541/28977/92259/65080/64975/9801/64983/28957/65005/5018/64965/65003/23107/63931/51116/6150/51258/11222/78988/29074/28998/54460/65008/7818/64976/55037/28973/64968	10:Monocyte	3
Whole PE	GO:0000470	maturation of LSU-rRNA	27	0.624328	1.8825	0.000238612	0.0251172	0.0233838	3597	tags=56%, list=22%, signal=43%	4809/55651/23246/11224/26156/6129/10412/4736/9875/6130/3692/84365/9326/51018/4839	1:CTB	1			Whole PE	hsa04070	Phosphatidylinositol signaling system	81	-0.435429	-1.56951	0.00694252	0.0328613	0.0228981	1353	tags=22%, list=10%, signal=20%	5728/805/3628/5298/9807/5289/3708/8897/8760/8821/1608/160851/5290/51196/3709/8527/3613/23236	13:Fibroblast	2			Whole PE	R-HSA-5419276	Mitochondrial translation termination	87	-0.591405	-2.29669	3.6839e-10	2.84942e-08	2.48684e-08	3356	tags=57%, list=25%, signal=44%	64432/29088/57129/60488/55173/124995/122704/64960/9553/64969/64978/51650/51373/51263/51253/92399/51073/64949/64979/55052/65993/79590/116541/28977/92259/65080/64975/9801/64983/28957/65005/5018/64965/65003/23107/63931/51116/6150/51258/11222/78988/29074/28998/54460/65008/7818/64976/55037/28973/64968	10:Monocyte	3
Whole PE	GO:1901796	regulation of signal transduction by p53 class mediator	97	0.433243	1.70928	0.000246193	0.0252675	0.0235236	2217	tags=32%, list=14%, signal=28%	6446/6224/9349/23246/27063/83787/7314/9212/4869/4282/6209/6880/6125/10467/6135/133383/6615/9521/6167/9099/387893/6154/3190/5371/972/754/4609/1984/23212/6201/200734	1:CTB	1			Whole PE	hsa04072	Phospholipase D signaling pathway	110	-0.389651	-1.47062	0.00709156	0.0331251	0.023082	2544	tags=30%, list=20%, signal=24%	5594/5331/5154/10000/3265/9266/6009/8394/5295/375/1785/7248/6237/2475/5894/9265/207/208/25759/8605/115/1608/160851/6655/2549/1902/5290/6654/109/185/111/8527/23236	13:Fibroblast	2			Whole PE	R-HSA-168255	Influenza Infection	147	-0.510449	-2.15853	4.47843e-10	3.31963e-08	2.89723e-08	2865	tags=51%, list=21%, signal=41%	5438/10762/6135/6137/9688/5435/7311/79902/6138/6147/6234/9972/6133/6143/6189/4927/6201/6229/6222/6181/6202/8021/11224/6165/6132/6235/6227/6156/6210/6130/23636/6141/4736/6230/6157/6142/6168/6193/6167/4928/3921/6205/200916/25873/9045/6208/6154/6161/9631/6152/6207/6155/6125/23521/6146/23225/6187/6224/3838/8086/6228/6159/9349/6218/6129/6136/5439/6169/6164/2926/6160/6124/3303/3320/3304	10:Monocyte	3
Whole PE	GO:0051648	vesicle localization	198	-0.326802	-1.57541	0.000255626	0.0259077	0.0241196	2815	tags=30%, list=17%, signal=25%	26115/10015/26276/51112/1000/54536/59349/26258/9321/5873/10947/10239/54874/55763/8301/1780/84364/4642/23122/55686/26286/1499/63971/60684/23332/60412/23233/80006/4646/122553/9892/157769/6622/4645/80208/8825/4430/164/583/81565/4133/8615/8546/10640/9919/83696/55770/5048/23291/55717/11127/55088/55930/7109/27445/8867/22878/4647/5728	1:CTB	1			Whole PE	hsa05017	Spinocerebellar ataxia	118	-0.395614	-1.51249	0.00743377	0.0336952	0.0234792	2973	tags=31%, list=23%, signal=24%	55062/55102/5706/55626/23130/5701/5331/5715/30849/10000/5695/10939/7222/2776/5295/5707/5709/2959/2906/25814/2475/5704/6667/6310/10524/207/5599/208/5289/9706/3708/5602/90550/5290/23369/3709/23236	13:Fibroblast	2			Whole PE	R-HSA-9711097	Cellular response to starvation	144	-0.507227	-2.1387	2.76265e-09	1.82028e-07	1.58866e-07	2858	tags=49%, list=21%, signal=39%	8649/525/6135/6137/7311/528/6138/6147/6234/6133/6143/6189/6201/6229/6222/6181/6202/11224/6165/6132/6235/526/6227/6156/6210/6130/1054/6141/4736/6230/8131/6157/6142/6168/6193/6167/729438/3921/28956/6205/200916/25873/9045/6208/6154/6161/6152/6207/1965/6155/6125/23521/467/6146/6187/6224/6228/6159/9349/6218/6129/6136/1649/57521/6169/2475/6164/6160/440275/389541/6124	10:Monocyte	3
Whole PE	GO:0036261	7-methylguanosine cap hypermethylation	8	0.849217	1.84805	0.00028521	0.0285491	0.0265788	2379	tags=88%, list=15%, signal=75%	6633/6632/6634/6637/6636/6635/6628	1:CTB	1			Whole PE	hsa04142	Lysosome	115	0.327398	1.40079	0.0107545	0.0454504	0.0316704	2885	tags=35%, list=22%, signal=27%	1509/1513/1522/10577/8722/968/3074/4864/9516/1777/4758/967/1512/135112/1508/5538/1514/4126/5660/2990/54/1200/3425/527/6609/4125/84572/1176/5476/1515/2519/53/79158/6448/950/7805/1519/9741/162/22901	13:Fibroblast	2			Whole PE	R-HSA-6798695	Neutrophil degranulation	415	0.308997	1.6863	4.7811e-08	2.93296e-06	2.55976e-06	1681	tags=26%, list=12%, signal=23%	1509/967/960/5315/55754/5223/3685/22918/4282/5337/2896/23601/5795/290/387/4973/3107/3958/5717/126014/272/6836/5724/1476/5049/196527/2495/6556/23352/124583/10493/5879/302/5870/2683/3903/199675/5476/3916/8972/2919/8566/23197/7097/2358/8778/56729/5768/64114/203068/2204/79895/51719/3106/1650/5707/1675/3684/140885/4126/7415/4790/1992/8804/1378/10970/100049587/961/28988/5273/5908/10312/54472/719/1522/1…	10:Monocyte	3
Whole PE	GO:0070227	lymphocyte apoptotic process	75	0.46423	1.75621	0.000329232	0.0314049	0.0292375	5036	tags=55%, list=31%, signal=38%	6194/9212/4282/84941/3958/578/1676/10758/100/7474/6352/8772/972/4067/101/29126/1942/8737/604/25865/55716/11035/5896/384/10945/407975/207/27242/602/148003/1399/7157/8915/26155/64332/581/79444/939/917/64919/27166	1:CTB	1			Whole PE	hsa03050	Proteasome	45	0.752254	2.60404	1e-10	5.95e-09	4.85965e-09	2419	tags=73%, list=15%, signal=63%	5692/5709/5685/5710/10213/5713/5717/5700/5695/5682/51371/5684/5690/11047/5687/9861/5688/5701/5691/10197/5704/5686/5683/5721/5714/5689/7979/5693/5719/5702/5705/5694/5720	1:CTB	2			Whole PE	R-HSA-72662	Activation of the mRNA upon binding of the cap-binding complex and eIFs, and subsequent binding to 43S	55	-0.621247	-2.2456	5.07467e-08	3.00928e-06	2.62636e-06	2389	tags=56%, list=18%, signal=47%	8664/6234/8667/6189/6201/6229/6222/6202/6235/6227/6210/27335/6230/51386/6193/3921/8663/6205/8669/6208/6207/1965/6187/6224/6228/6218/1977/8665/10480/1978/3646	10:Monocyte	3
Whole PE	GO:0007005	mitochondrion organization	491	0.304801	1.43068	0.000344828	0.0325101	0.0302664	4070	tags=36%, list=25%, signal=28%	9001/79064/4358/7332/91942/389203/8870/664/1191/92609/6742/1890/55967/4725/54974/56993/3099/30968/401505/160140/51287/131118/80273/2395/84275/4718/4696/790955/51025/578/23400/23770/55744/51103/8878/493753/706/84233/51295/284184/3320/728489/6341/617/5898/28958/57190/84300/84334/10469/9049/25994/192111/100188893/27069/4700/26355/10440/1347/9997/51142/26520/285973/11315/8996/10063/5018/29078/59286/1…	1:CTB	1			Whole PE	hsa05012	Parkinson disease	220	0.523915	2.30343	1e-10	5.95e-09	4.85965e-09	4248	tags=60%, list=26%, signal=45%	7277/5692/7280/6647/7332/5709/515/5685/10381/2771/5710/7295/10213/5713/7314/808/111/55967/55630/4725/5717/2081/51465/5700/5695/5682/4718/4696/5684/7388/7381/5690/11047/5687/10476/801/9861/5688/509/5701/5691/1843/5704/9246/84790/5686/1340/5683/203068/7846/4700/539/1347/27089/5714/54205/5689/7311/11315/7979/10383/7316/25828/514/5693/5719/51079/5702/4712/6233/4715/9377/4710/842/5705/4728/516/805/741…	1:CTB	2			Whole PE	R-HSA-163200	Respiratory electron transport, ATP synthesis by chemiosmotic coupling, and heat production by uncoupling proteins.	108	-0.513153	-2.05822	2.44514e-07	1.27939e-05	1.11659e-05	3129	tags=49%, list=23%, signal=38%	4708/4713/55744/7351/516/4726/6391/1327/514/25880/506/4701/4710/116228/515/55471/4725/10128/498/27089/7381/4704/9551/84987/1340/1350/522/29796/4717/4731/4723/6834/10632/4706/126328/4712/4707/4705/521/517/6390/51295/4695/27109/4722/80224/509/4711/4709/25915/4696/4716/539	10:Monocyte	3
Whole PE	GO:1990266	neutrophil migration	90	0.449597	1.76219	0.000355147	0.0330981	0.0308138	2201	tags=28%, list=13%, signal=24%	2920/5879/6846/5478/2919/1803/2921/3958/3576/9750/6352/51561/972/5881/58515/57580/3554/3552/101/51192/3689/5479/6375/83700/708	1:CTB	1			Whole PE	hsa05020	Prion disease	232	0.503503	2.22005	1e-10	5.95e-09	4.85965e-09	4354	tags=54%, list=27%, signal=40%	7277/5879/5692/1535/7280/6647/5709/515/5685/10381/5710/10213/5595/5713/55967/4725/3310/5717/2906/3304/5700/5695/1958/5682/9586/4718/4696/5684/7388/7381/5690/11047/5687/10476/9861/1460/5688/509/6352/5701/5691/5704/84790/5686/1340/5683/203068/7846/4700/3552/539/1347/27089/5714/54205/5689/7979/10383/514/5693/5719/51079/572/5702/4712/4715/9377/4710/842/5705/4728/516/5603/7416/7385/4709/10963/4689/473…	1:CTB	2			Whole PE	R-HSA-3371568	Attenuation phase	14	-0.827146	-2.15201	1.92273e-06	8.55136e-05	7.46324e-05	368	tags=57%, list=3%, signal=56%	2288/10728/3303/3320/3326/3304/3312/3337	10:Monocyte	3
Whole PE	GO:0070315	G1 to G0 transition involved in cell differentiation	5	0.919407	1.76962	0.000386852	0.0353366	0.0328978	776	tags=40%, list=5%, signal=38%	2627/8851	1:CTB	1			Whole PE	hsa03040	Spliceosome	126	0.509892	2.10289	8.00701e-09	2.8585e-07	2.33468e-07	2590	tags=37%, list=16%, signal=32%	4809/6626/3183/5093/6629/9939/6633/153527/3310/83443/6632/51639/6634/3304/6637/7307/10286/27258/6636/9775/51503/10907/6627/10713/51690/10450/4116/10189/8896/6631/10465/3178/6428/3190/4670/151903/25949/23658/51645/25804/6635/5356/11017/6628/3312/56949/22827	1:CTB	2			Whole PE	R-HSA-611105	Respiratory electron transport	90	-0.467707	-1.82283	7.08017e-05	0.00229011	0.00199871	3129	tags=43%, list=23%, signal=34%	4708/4713/55744/4726/6391/1327/25880/4701/4710/116228/55471/4725/10128/27089/7381/4704/84987/1340/1350/29796/4717/4731/4723/6834/4706/126328/4712/4707/4705/6390/51295/4695/4722/80224/4711/4709/25915/4696/4716	10:Monocyte	3
Whole PE	GO:0097530	granulocyte migration	110	0.423066	1.70597	0.000433976	0.0386668	0.0359982	2290	tags=27%, list=14%, signal=24%	2920/5879/301/6846/5478/5595/2919/1803/2921/3958/3576/9750/6352/51561/972/5881/58515/57580/5919/3554/3552/23765/101/51192/3689/5479/6375/83700/708/57402	1:CTB	1			Whole PE	hsa04714	Thermogenesis	199	0.41503	1.80656	1.77008e-06	5.26598e-05	4.30098e-05	5102	tags=56%, list=31%, signal=39%	91942/515/788/6194/152831/111/55967/388753/4725/11343/51287/9586/4718/4696/7388/7381/10476/9551/55744/51103/493753/509/521/51548/284184/123096/1340/28958/6598/84335/4700/196883/539/1347/27089/10063/29078/514/51079/4712/64223/6009/4715/9377/55811/4710/4728/516/5603/10632/7385/4709/4731/1329/4697/1327/8110/10975/29796/1350/518/4704/10891/4717/6392/2180/4722/9167/4720/7350/2778/6196/4726/6601/4706/5…	1:CTB	2			Whole PE	R-HSA-6799198	Complex I biogenesis	49	-0.541116	-1.91786	0.000113726	0.00354945	0.0030978	3129	tags=55%, list=23%, signal=43%	4708/4713/55744/4726/25880/4701/4710/55471/4725/4704/4717/4731/4723/4706/126328/4712/4707/4705/51295/4695/4722/80224/4711/4709/25915/4696/4716	10:Monocyte	3
Whole PE	GO:0034471	ncRNA 5'-end processing	20	0.680358	1.91317	0.000481492	0.0419778	0.0390807	3487	tags=60%, list=21%, signal=47%	6741/54974/10248/10775/29777/10557/10556/10799/10940/79897/54931/51367	1:CTB	1			Whole PE	hsa04382	Cornified envelope formation	120	0.43886	1.79479	2.90601e-05	0.000798036	0.000651794	4383	tags=40%, list=27%, signal=29%	144501/1365/3691/3856/6275/3728/6284/3875/5518/1366/7062/3918/1308/6768/6282/3880/25984/9074/1364/3872/24146/5493/100506658/376497/6277/5652/26154/3914/59344/6281/57402/5045/2125/5339/10999/5516/51099/3855/11240/390792/6280/3892/5528/3858/3909/140576/137075/64834	1:CTB	2			Whole PE	R-HSA-389957	Prefoldin mediated transfer of substrate to CCT/TriC	22	-0.663242	-1.96109	0.000226608	0.00639899	0.00558475	388	tags=36%, list=3%, signal=35%	10574/908/10471/10576/7203/5202/10575/6950	10:Monocyte	3
Whole PE	GO:0072593	reactive oxygen species metabolic process	179	0.372384	1.59677	0.000514102	0.044344	0.0412836	4198	tags=37%, list=26%, signal=28%	5879/4358/283120/1535/6647/5155/2150/2771/7295/8870/2643/664/54541/387/3099/5052/55765/2878/84275/706/5166/84334/948/57580/11334/11315/10935/54/1490/51079/3689/93974/55811/7416/10131/8737/4689/1497/2305/29949/7351/11035/5580/3692/2950/51/440503/57103/384/64581/140823/4722/7040/378/7350/7409/10193/7001/25824/1647/5159/1906/613/7157/7057/4724/80149	1:CTB	1			Whole PE	hsa05323	Rheumatoid arthritis	73	0.487758	1.85946	8.32478e-05	0.00185747	0.00151708	5096	tags=56%, list=31%, signal=39%	527/2920/2919/2921/2353/3576/7422/3383/6352/51561/50617/8992/3606/9550/3552/54/2321/3689/529/51382/90423/3123/9296/942/3115/3108/7040/526/533/535/3725/6348/3122/534/3117/9114/3119/10312/7124/7043/3109	1:CTB	2			Whole PE	R-HSA-389958	Cooperation of Prefoldin and TriC/CCT in actin and tubulin folding	23	-0.63935	-1.913	0.000494912	0.0115848	0.0101107	388	tags=43%, list=3%, signal=42%	10376/5203/10574/908/10471/10576/7203/5202/10575/6950	10:Monocyte	3
Whole PE	GO:0099022	vesicle tethering	31	-0.570679	-1.94082	0.000536037	0.0450087	0.0419024	2629	tags=52%, list=16%, signal=43%	51112/54536/9321/55763/60684/60412/23233/80006/122553/157769/10640/83696/55770/55717/7109/22878	1:CTB	1			Whole PE	hsa05017	Spinocerebellar ataxia	131	0.408755	1.68641	0.00021287	0.00422192	0.00344824	3494	tags=40%, list=21%, signal=32%	5692/5709/5685/5710/10213/5331/5713/5717/2081/2906/5700/5695/5682/5684/5690/11047/5687/9861/5688/5701/5691/5704/5686/5683/5714/54205/5689/7979/23130/5693/5719/5702/5705/23152/7416/489/5694/2959/773/2890/10524/5579/5706/8408/5293/4287/10528/6712/7494/7417/207/56652/5718	1:CTB	2			Whole PE	R-HSA-6783783	Interleukin-10 signaling	40	0.516363	1.93918	0.000503928	0.0116427	0.0101612	2740	tags=52%, list=20%, signal=42%	3588/5724/3554/2919/3569/2920/3576/6347/3606/3716/1234/3553/3552/942/941/7132/1230/6351/6364/1440/3586	10:Monocyte	3
Whole PE	GO:0060271	cilium assembly	308	-0.286953	-1.4398	0.000607106	0.0487368	0.0453732	3464	tags=31%, list=21%, signal=25%	84747/54768/8195/84100/22873/79846/5991/57562/85462/9662/84223/7016/80216/26259/9474/1874/57539/10309/54903/317662/57096/9851/80210/2909/92344/161502/4134/387707/55036/51057/5314/200162/4750/136332/10096/23386/401024/54874/989/27185/63917/123016/54806/153241/79659/27241/2932/23268/80321/23116/26146/144132/84058/57787/54970/5108/91147/10464/4735/57560/202018/117178/118491/84071/79582/583/55779/841…	1:CTB	1			Whole PE	hsa00562	Inositol phosphate metabolism	71	-0.439337	-1.77714	0.000256635	0.00482204	0.00393839	1261	tags=35%, list=8%, signal=33%	9807/5332/79837/5291/23396/5335/9896/5297/5286/9110/8394/51196/5336/5289/253430/9562/200576/5290/3631/22908/8395/8867/5728/23262/55300	1:CTB	2			Whole PE	R-HSA-449147	Signaling by Interleukins	374	0.260149	1.40512	0.000512845	0.0116968	0.0102085	2274	tags=26%, list=17%, signal=22%	5291/1326/2309/7431/23291/2885/3688/3601/4282/5055/2889/6655/5717/3588/9446/5598/1848/5724/821/6648/5687/5306/9683/302/9491/3554/2919/5970/3569/5898/5034/6813/2920/29110/7040/3656/6196/207/3576/5707/3575/3684/6347/867/3606/4790/7184/3716/29949/5528/1234/8454/5908/4067/3553/5443/5782/54472/3552/6804/5708/6500/5451/942/6777/6850/5688/941/6654/7335/163702/5594/3091/3082/4615/11213/8945/7534/5714/138…	10:Monocyte	3
Whole PE	GO:0002181	cytoplasmic translation	139	-0.571206	-2.40599	1e-10	2.57233e-07	2.22702e-07	2793	tags=55%, list=21%, signal=44%	6135/54956/6137/7311/6138/6147/8664/6234/8667/6133/6143/6189/57409/6201/6229/6222/6181/6202/170506/11224/6165/6132/6235/6227/6156/6210/6130/27335/6141/4736/6230/6157/6142/1939/6168/51386/6193/6167/3192/3921/8663/6205/200916/8669/25873/9045/6208/6154/6161/6152/6207/6155/6125/23521/6146/7555/6187/6224/6228/6159/9349/6218/6129/6136/10605/6169/8665/10480/2475/6164/6160/440275/7884/10399/6124/3646	10:Monocyte	4			Whole PE	hsa03272	Virion - Hepatitis viruses	40	0.555275	1.88979	0.000490048	0.00833082	0.00680418	1691	tags=30%, list=10%, signal=27%	1365/949/128866/1366/1803/967/9074/1364/24146/100506658/3949/5119	1:CTB	2			Whole PE	R-HSA-1483255	PI Metabolism	73	0.394121	1.68713	0.00152324	0.0301093	0.0262781	1839	tags=29%, list=14%, signal=25%	5291/23533/5728/8871/80230/8898/25816/5305/54477/90809/84725/200576/23760/8897/55697/56623/51552/55361/22874/30849/10908	10:Monocyte	3
Whole PE	GO:0071219	cellular response to molecule of bacterial origin	176	0.326313	1.61795	0.000159547	0.0115232	0.00997629	1800	tags=28%, list=13%, signal=24%	7431/4282/10318/613/196/387/5724/824/10859/2919/5970/3569/7097/2920/2921/7099/114548/3656/207/3576/2048/140885/6347/55829/6714/4790/7474/1234/92140/4067/3553/3032/3552/9373/968/2213/706/7096/5142/942/19/7128/11027/941/929/5594/4615/11213/2635	10:Monocyte	4			Whole PE	hsa00010	Glycolysis / Gluconeogenesis	48	0.503025	1.76419	0.00128147	0.0198907	0.0162457	2986	tags=35%, list=18%, signal=29%	5315/3939/219/3099/3098/2821/2597/2023/92579/130589/2203/5223/7167/5211/223/224/226	1:CTB	2			Whole PE	R-HSA-6798695	Neutrophil degranulation	343	0.3603	1.78351	1.33542e-08	3.38243e-06	2.99616e-06	2499	tags=32%, list=19%, signal=26%	5329/3304/3303/1509/7077/2512/3958/1522/5315/10493/1476/4282/960/10577/258010/4831/2495/1471/968/3074/976/2934/5806/3106/10043/3107/26/3312/1604/4758/967/1512/226/28956/8566/3320/1508/11031/3614/567/8635/55754/23412/387921/25798/1675/11010/4790/6793/84418/10383/391/25797/4126/29108/2444/3326/5836/5660/2990/1938/3608/7130/5788/5337/2919/8804/272/966/5768/6515/1729/8773/2821/527/7415/6727/684/2992/…	13:Fibroblast	3
Whole PE	GO:0061077	chaperone-mediated protein folding	68	-0.637133	-2.42267	2.63604e-10	4.06847e-07	3.52231e-07	2067	tags=46%, list=15%, signal=39%	3305/3300/972/10491/5203/27433/10574/5481/7266/3315/11080/6767/908/2288/10471/10728/10576/10808/3313/10049/7203/3303/5202/3336/10575/6950/3304/3310/3312/3337/26973	10:Monocyte	3			Whole PE	hsa05134	Legionellosis	54	0.477544	1.71206	0.00171579	0.0255223	0.0208453	2675	tags=37%, list=16%, signal=31%	2920/1915/664/2919/3310/2921/3304/3297/1937/81876/3576/3606/54205/834/3689/842/3329/7415/3312/375	1:CTB	2			Whole PE	R-HSA-9711097	Cellular response to starvation	143	0.453151	2.03135	2.38155e-07	2.94094e-05	2.60509e-05	3696	tags=54%, list=28%, signal=39%	51065/467/9296/1051/116832/28956/25873/6396/6231/6223/200916/8992/23677/6203/8131/1649/201163/6136/6135/83667/389541/6158/6142/6209/527/6165/6166/6171/58528/8649/6210/6206/468/6139/6129/7311/4736/2197/6143/84219/6227/51382/6137/6167/6154/6232/6128/64223/526/155066/23334/6161/6130/6156/6194/51121/6234/6144/6205/11224/51606/6132/6235/6222/533/6204/6207/6229/6146/10670/6141/6181/79726/57761/6193/103…	13:Fibroblast	3
Whole PE	GO:0032543	mitochondrial translation	128	-0.52976	-2.2222	6.35289e-10	7.74758e-07	6.70753e-07	3403	tags=51%, list=25%, signal=38%	92170/64432/29088/57129/60488/55173/124995/122704/64960/9553/64969/54938/85476/64978/51650/55699/51373/51263/51253/4701/51073/285367/64949/64979/84311/84300/10128/55052/65993/26164/79590/79828/116541/28977/65080/708/64975/9801/51335/64983/28957/55278/65005/64965/65003/23107/63931/51116/6150/10352/51258/219402/11222/78988/115416/29074/28998/54460/65008/7818/64976/55037/28958/28973/64968	10:Monocyte	3			Whole PE	hsa03050	Proteasome	45	0.639855	2.50004	3.41138e-09	4.73959e-07	3.57596e-07	2269	tags=62%, list=15%, signal=53%	5692/51371/5710/10197/5685/5694/5704/10213/5691/5689/5700/5695/5688/5682/5720/5684/5709/5683/7979/5687/5705/5713/9861/5714/5686/5702/5690/5693	4:CTB-2	2			Whole PE	R-HSA-6783783	Interleukin-10 signaling	27	0.655702	2.12156	4.45986e-05	0.00272667	0.00241529	2662	tags=48%, list=20%, signal=38%	2920/3576/3976/6348/3383/2919/6347/3627/3554/5743/7124/7297/6774	13:Fibroblast	3
Whole PE	GO:0006458	'de novo' protein folding	39	-0.668235	-2.29288	3.16153e-07	0.000128408	0.00011117	751	tags=38%, list=6%, signal=36%	7266/11080/6767/10728/56886/10576/10808/3313/3329/3303/3336/3304/3310/3312/3337	10:Monocyte	3			Whole PE	hsa05323	Rheumatoid arthritis	74	0.451117	2.01682	3.78223e-06	0.000327163	0.00024684	2552	tags=42%, list=16%, signal=35%	3123/50617/527/2919/2920/54/3122/3383/3552/3689/6352/2353/10312/2921/533/3117/3606/8992/9296/534/3553/529/90423/7043/3569/7042/8792/942/9550/525/2321	4:CTB-2	2			Whole PE	R-HSA-449147	Signaling by Interleukins	334	0.297541	1.47492	0.000154381	0.0072031	0.00638052	2110	tags=23%, list=16%, signal=20%	1026/8878/9021/5292/3726/6648/8660/28512/6935/7422/1326/4282/2920/3576/3162/3965/5606/4313/9244/4792/595/6356/3312/7431/6773/9261/3936/4791/3976/3320/132014/6772/604/23529/8767/6348/3725/4790/552900/3091/2308/7412/654483/1436/4205/3383/11274/8651/2919/57161/5291/834/59307/3601/6347/6776/1845/23765/3627/246330/5718/146433/3575/2162/9235/57162/3554/84166/2353/5604/5898/5700/3566/5743/7124/7311/4067…	13:Fibroblast	3
Whole PE	GO:0033108	mitochondrial respiratory chain complex assembly	89	-0.519974	-2.04701	7.38804e-07	0.000245007	0.000212116	3239	tags=51%, list=24%, signal=39%	493753/4708/4713/55744/7019/90871/25813/55572/25880/90624/4710/116228/55471/84300/4725/131474/135154/4704/79064/57226/84987/83943/4717/100303755/6834/5018/4706/54902/126328/4712/4707/4705/51295/4695/4722/80224/28958/4711/84275/4709/79145/25915/51287/4696/4716	10:Monocyte	3			Whole PE	hsa00562	Inositol phosphate metabolism	70	-0.560466	-1.73149	6.13438e-05	0.00303214	0.00228771	3401	tags=41%, list=22%, signal=33%	51196/3613/9896/5287/64419/56623/3633/4329/8871/8897/5335/5291/9110/64768/253430/200576/3631/9107/8394/5290/9562/22908/8867/23262/5336/5728/3635/8395/55300	4:CTB-2	2			Whole PE	R-HSA-168255	Influenza Infection	146	0.361927	1.62684	0.000236361	0.0102212	0.00905392	3324	tags=43%, list=26%, signal=33%	9636/3304/3303/51065/116832/3320/25873/6396/6231/5435/6223/9688/5430/200916/5610/6203/6136/3838/6135/5437/6158/6142/6209/6165/6166/6171/6210/6206/8086/6139/6129/7311/3843/4736/2197/6143/6227/6137/6167/6154/6232/6128/6161/6130/6156/10762/6194/51121/6234/6144/6205/11224/5439/6132/6235/6222/5436/6204/9818/6207/6229/6146/23279	13:Fibroblast	3
Whole PE	GO:0042273	ribosomal large subunit biogenesis	68	-0.559641	-2.12801	1.05051e-06	0.0003118	0.000269943	3197	tags=54%, list=24%, signal=42%	29960/55027/285855/51018/6135/9326/55153/6147/51388/4869/2971/11224/10412/6165/55052/29997/22907/55759/6130/4736/55299/84231/9045/6154/6152/6125/51187/55651/84154/8886/115416/6129/23481/6169/4809/23195/26156	10:Monocyte	3			Whole PE	hsa05161	Hepatitis B	136	-0.45795	-1.49444	0.000542847	0.0104347	0.00787286	2180	tags=29%, list=14%, signal=25%	10971/4775/9134/1017/317/10000/5594/6777/5291/2033/5925/3454/355/673/1643/5295/890/3717/1432/64764/1871/5290/332/836/29110/1026/5599/5608/1386/6654/5601/6885/5894/3845/596/6416/23118/4773/4089	4:CTB-2	2			Whole PE	R-HSA-168273	Influenza Viral RNA Transcription and Replication	127	0.372952	1.63162	0.000537786	0.0186578	0.0165271	3324	tags=46%, list=26%, signal=34%	51065/116832/3320/25873/6396/6231/5435/6223/9688/5430/200916/6203/6136/6135/5437/6158/6142/6209/6165/6166/6171/6210/6206/8086/6139/6129/7311/3843/4736/2197/6143/6227/6137/6167/6154/6232/6128/6161/6130/6156/10762/6194/51121/6234/6144/6205/11224/5439/6132/6235/6222/5436/6204/9818/6207/6229/6146/23279	13:Fibroblast	3
Whole PE	GO:0051604	protein maturation	426	-0.347886	-1.64278	1.24945e-06	0.0003214	0.000278254	2498	tags=28%, list=18%, signal=23%	64175/10269/10988/51098/402/5345/121665/84236/169714/5027/90624/1387/50846/79031/51126/9532/79659/5054/60681/131118/3305/3300/834/15/972/22824/9159/10491/5203/10450/10856/131474/7265/79094/121506/83874/59082/55851/27433/2162/10283/2653/80155/8767/53938/25764/1203/9360/200558/57002/196294/83943/80018/28972/1201/55664/10954/9049/134492/10574/8492/1155/5481/4706/4311/837/431705/219899/871/3428/7266/…	10:Monocyte	3			Whole PE	hsa04120	Ubiquitin mediated proteolysis	131	-0.46964	-1.52901	0.000689222	0.0125511	0.00946964	3381	tags=40%, list=22%, signal=31%	25847/65264/51366/1642/23221/23295/51433/55284/92912/64750/10054/10055/329/9354/57154/9320/7325/64682/9039/5071/8454/7428/89910/83737/8881/1643/8453/26272/9886/26259/51434/8916/672/55294/8945/996/55236/6502/29945/11065/9690/57448/4591/7337/867/8925/23291/8554/8924/8065/64326/26091	4:CTB-2	2			Whole PE	R-HSA-72766	Translation	259	0.305852	1.45937	0.000686575	0.0209879	0.0185911	3068	tags=34%, list=24%, signal=27%	51065/6747/90701/23478/116832/26589/78988/116541/25873/6231/6223/5018/64951/8666/200916/1936/54938/54516/26986/51642/29927/6203/51650/1938/64960/1983/6136/6135/23480/27335/6158/6142/6209/6165/6166/6150/55157/51386/6171/6727/64432/6183/6210/6206/8663/51504/6745/6139/63875/10952/6129/28972/7311/6728/2935/4736/1967/2197/51264/6143/6227/6137/8662/23438/6167/6154/6232/6730/6128/118487/1933/6161/6130/6…	13:Fibroblast	3
Whole PE	GO:0015986	proton motive force-driven ATP synthesis	62	-0.568405	-2.12382	1.40309e-06	0.000338364	0.000292941	3129	tags=58%, list=23%, signal=45%	4708/4713/516/4726/6391/9605/514/506/4701/4710/515/4725/498/4704/9551/522/4717/4731/4723/10632/4706/126328/4712/4707/4705/521/517/6390/4695/4722/509/4711/4709/4696/4716/539	10:Monocyte	3			Whole PE	hsa04218	Cellular senescence	144	-0.443726	-1.45851	0.00123153	0.0191005	0.0144111	3256	tags=38%, list=21%, signal=31%	808/22800/5928/2113/5501/2475/10114/993/28996/2305/3265/11200/5534/1029/4775/9134/5532/1017/545/10000/1021/5594/5291/4605/22808/5925/10111/1978/5295/890/5500/1432/90550/1871/5290/132660/472/4361/1026/4683/5608/8945/983/4087/5894/3845/5533/54822/23291/1111/4773/5728/5933/286826/5530	4:CTB-2	2			Whole PE	R-HSA-9692914	SARS-CoV-1-host interactions	84	0.410726	1.67922	0.00108199	0.0304504	0.026973	3300	tags=46%, list=25%, signal=35%	51065/7187/861/4792/6231/5094/6223/4790/7706/29108/6203/7532/3838/10971/2280/834/6209/684/6210/6206/7311/3661/2197/64135/6227/7533/6232/2033/5970/3656/598/6194/6234/6205/6235/6222/6204/6207/6229	13:Fibroblast	3
Whole PE	GO:0042776	proton motive force-driven mitochondrial ATP synthesis	55	-0.577886	-2.11316	3.45803e-06	0.000741267	0.000641757	3129	tags=60%, list=23%, signal=46%	4708/4713/4726/6391/514/506/4701/4710/515/4725/498/4704/9551/522/4717/4731/4723/10632/4706/126328/4712/4707/4705/521/6390/4695/4722/509/4711/4709/4696/4716/539	10:Monocyte	3			Whole PE	hsa04382	Cornified envelope formation	110	0.30198	1.45439	0.00126565	0.0191005	0.0144111	1493	tags=20%, list=10%, signal=18%	6275/25984/6277/1365/6284/3691/1366/3728/144501/1364/3875/5518/5493/3856/7062/6768/6282/5045/3914/6281/57402/5652	4:CTB-2	2			Whole PE	R-HSA-3247509	Chromatin modifying enzymes	180	-0.382112	-1.51784	0.00122456	0.0334023	0.0295878	4003	tags=53%, list=31%, signal=37%	26610/22992/79084/7862/7468/23338/54859/339287/57634/79595/6599/5926/23512/10499/58508/8085/1108/54815/57325/84289/27154/6944/10196/8295/196528/6595/8607/55729/84193/55818/3066/6881/55250/4297/284058/1387/51562/9757/55257/54014/29072/1107/23522/55193/23774/86/79685/2874/64769/9070/54904/8520/93624/5929/63976/55140/8648/64324/55929/6871/60/55167/55683/27097/6601/6314/51317/9611/57492/3065/6597/536…	13:Fibroblast	3
Whole PE	GO:0006119	oxidative phosphorylation	114	-0.467998	-1.91583	5.32648e-06	0.00105396	0.000912475	3498	tags=50%, list=26%, signal=37%	513/9167/79736/2631/10105/4708/4713/4726/983/6391/1327/11315/514/4436/506/891/1355/4701/4710/515/7124/84300/4725/498/65018/1716/27089/400916/7381/4704/246269/9551/205327/1340/1350/522/29796/4717/4731/4723/10632/4706/126328/4712/4707/4705/521/6390/4695/4722/509/4711/84275/4709/4696/4716/539	10:Monocyte	3			Whole PE	hsa01522	Endocrine resistance	89	-0.479523	-1.52246	0.001837	0.0220763	0.0166563	2916	tags=44%, list=19%, signal=36%	6199/4893/5469/6198/2885/108/581/115/113/2475/112/3265/9611/1029/3480/10000/5594/5291/5925/673/4851/5295/2099/1432/1871/5290/1026/5599/6654/5601/1956/5894/3845/2100/5747/5567/596/1027/1031	4:CTB-2	2			Whole PE	R-HSA-4839726	Chromatin organization	180	-0.382112	-1.51784	0.00122456	0.0334023	0.0295878	4003	tags=53%, list=31%, signal=37%	26610/22992/79084/7862/7468/23338/54859/339287/57634/79595/6599/5926/23512/10499/58508/8085/1108/54815/57325/84289/27154/6944/10196/8295/196528/6595/8607/55729/84193/55818/3066/6881/55250/4297/284058/1387/51562/9757/55257/54014/29072/1107/23522/55193/23774/86/79685/2874/64769/9070/54904/8520/93624/5929/63976/55140/8648/64324/55929/6871/60/55167/55683/27097/6601/6314/51317/9611/57492/3065/6597/536…	13:Fibroblast	3
Whole PE	GO:0046034	ATP metabolic process	112	-0.464561	-1.89094	6.92906e-06	0.00133679	0.00115734	3235	tags=46%, list=24%, signal=35%	8505/10891/4708/4713/516/4726/6391/9605/525/514/506/51024/4701/4710/515/4725/526/498/65018/55811/65220/4704/9551/522/4717/4731/4723/10632/4706/126328/57673/4712/4707/4705/521/517/6390/4695/27109/4722/509/4711/4709/93974/4696/4716/114789/539/3303/3304/3312	10:Monocyte	3			Whole PE	hsa04660	T cell receptor signaling pathway	106	-0.467139	-1.49863	0.00216636	0.024775	0.0186924	4929	tags=56%, list=32%, signal=38%	6655/868/926/925/5588/5604/29851/5519/1493/5525/940/915/4893/3702/55844/8915/917/4690/2885/920/5170/5515/7409/916/7124/9402/5527/3932/8440/1147/3265/5534/5521/4775/5532/10000/5335/5594/5291/5523/5781/5295/5062/1432/2932/10892/5290/5529/5599/10451/6654/5601/6885/5894/3845/5533/1739/4773/5530	4:CTB-2	2			Whole PE	R-HSA-72766	Translation	262	0.670438	3.01049	1e-10	2.82879e-09	2.30622e-09	4580	tags=80%, list=28%, signal=59%	6224/23521/6124/5464/8669/9349/23478/1936/219402/51504/6218/6128/64981/6160/6181/200916/1915/122704/6194/8668/6205/11224/327/64960/7458/9669/10480/6129/8894/79590/6143/51318/9045/6209/6158/7965/9255/51386/64976/6217/6132/6125/6161/1973/64928/6135/51650/90480/6184/9521/1937/65005/6727/26589/64969/51258/8666/55168/6152/6146/6123/51116/6159/2935/51253/6202/6203/6137/6147/25873/6175/60488/8667/6167/5…	1:CTB	3
Whole PE	GO:0009141	nucleoside triphosphate metabolic process	154	-0.423313	-1.80404	1.5542e-05	0.00226297	0.00195918	2913	tags=39%, list=21%, signal=31%	516/4726/1841/6391/9605/525/3704/514/506/51024/4701/4710/515/2773/4725/526/50808/498/65018/55811/1716/65220/4704/25939/9551/4830/1854/522/4717/4731/4723/10632/4706/126328/55270/57673/129607/4712/4707/9567/4705/521/517/6390/4695/27109/4722/509/4711/4709/93974/120892/4696/4716/114789/539/7371/3303/3304/3312	10:Monocyte	3			Whole PE	hsa04664	Fc epsilon RI signaling pathway	55	-0.524964	-1.57382	0.00310273	0.0309736	0.0233692	3292	tags=42%, list=21%, signal=33%	5170/7409/7124/3265/6850/10000/5335/5594/5291/5295/1432/5290/5599/5608/10451/6654/5601/5894/3845/6416/5336/3635/9846	4:CTB-2	2			Whole PE	R-HSA-168273	Influenza Viral RNA Transcription and Replication	129	0.653362	2.69127	1e-10	2.82879e-09	2.30622e-09	3662	tags=73%, list=22%, signal=57%	6224/23521/6124/9349/5437/6218/6128/6160/6181/200916/6194/6205/11224/6129/6143/9045/6209/6158/6217/6132/6125/6161/6135/2962/81929/5439/5436/6152/6146/6123/6159/6202/6203/6137/6147/25873/6175/5435/6167/6176/3320/6154/6157/6208/6139/6165/6155/6141/6230/6193/6207/6206/7311/6229/6133/6138/6189/79023/6142/6169/6222/6171/5438/6210/6233/6144/6168/6188/4736/6228/5434/6201/6122/6227/6130/6232/6156/6164/61…	1:CTB	3
Whole PE	GO:0009144	purine nucleoside triphosphate metabolic process	140	-0.431854	-1.82105	2.23262e-05	0.00287153	0.00248605	2913	tags=40%, list=21%, signal=32%	516/4726/6391/9605/525/3704/514/506/51024/4701/4710/515/2773/4725/526/50808/498/65018/55811/1716/65220/4704/25939/9551/4830/522/4717/4731/4723/10632/4706/126328/55270/57673/4712/4707/9567/4705/521/517/6390/4695/27109/4722/509/4711/4709/93974/120892/4696/4716/114789/539/3303/3304/3312	10:Monocyte	3			Whole PE	hsa05135	Yersinia infection	124	-0.445744	-1.44316	0.00313317	0.0309736	0.0233692	3313	tags=35%, list=21%, signal=28%	920/51135/7409/3676/7124/8976/3932/1147/9815/4775/10000/5335/5594/5291/57180/1793/5295/6093/2776/8935/1432/2932/8394/5290/23365/29110/5599/5608/10451/5601/6885/29108/9475/10092/5747/5586/8874/3688/6416/23118/10096/4773/8395	4:CTB-2	2			Whole PE	R-HSA-5368286	Mitochondrial translation initiation	87	0.68239	2.66583	1e-10	2.82879e-09	2.30622e-09	3882	tags=76%, list=24%, signal=58%	219402/64981/122704/64960/79590/51318/64976/64928/51650/90480/65005/26589/64969/51258/55168/51116/51253/60488/51642/219927/7818/65008/28998/64983/64432/6182/78988/54460/51649/116541/63931/5018/64979/51073/51081/64968/55052/56945/65003/51264/51021/28957/65993/116540/51373/29093/3396/6183/54948/124995/118487/51023/29088/64951/57129/29074/64975/9553/54998/28973/84545/28977/64978/63875/26284/54534	1:CTB	3
Whole PE	GO:0009199	ribonucleoside triphosphate metabolic process	140	-0.427158	-1.80124	3.5032e-05	0.00409609	0.00354622	3743	tags=47%, list=28%, signal=35%	201163/30968/4907/168537/4831/572/513/790/8505/10891/4708/4713/516/4726/6391/9605/525/3704/514/506/51024/4701/4710/515/2773/4725/526/50808/498/65018/55811/65220/4704/9551/4830/522/4717/4731/4723/10632/4706/126328/57673/4712/4707/9567/4705/521/517/6390/4695/27109/4722/509/4711/4709/93974/120892/4696/4716/114789/539/7371/3303/3304/3312	10:Monocyte	3			Whole PE	hsa04070	Phosphatidylinositol signaling system	86	-0.471676	-1.49307	0.00400813	0.0374815	0.0282793	3648	tags=37%, list=23%, signal=29%	160851/5579/805/51196/808/3613/5287/64419/56623/3633/8871/8897/5335/5291/9110/64768/5295/253430/200576/1040/3631/9107/8394/5290/22908/8867/23262/5336/5728/3635/8395/55300	4:CTB-2	2			Whole PE	R-HSA-5419276	Mitochondrial translation termination	87	0.678138	2.64922	1e-10	2.82879e-09	2.30622e-09	3882	tags=76%, list=24%, signal=58%	64981/122704/64960/79590/51318/64976/64928/51650/90480/65005/26589/64969/51258/55168/51116/51253/60488/51642/219927/7818/65008/28998/64983/64432/6182/78988/54460/51649/116541/63931/5018/64979/54516/51073/51081/64968/55052/56945/65003/51264/51021/28957/65993/116540/51373/29093/3396/6183/54948/124995/118487/51023/29088/64951/57129/29074/64975/9553/54998/28973/84545/28977/64978/63875/26284/54534	1:CTB	3
Whole PE	GO:0009205	purine ribonucleoside triphosphate metabolic process	134	-0.428638	-1.80228	3.91376e-05	0.00444155	0.0038453	3235	tags=48%, list=24%, signal=37%	201163/30968/4907/168537/4831/572/513/8505/10891/4708/4713/516/4726/6391/9605/525/3704/514/506/51024/4701/4710/515/2773/4725/526/50808/498/65018/55811/65220/4704/9551/4830/522/4717/4731/4723/10632/4706/126328/57673/4712/4707/9567/4705/521/517/6390/4695/27109/4722/509/4711/4709/93974/120892/4696/4716/114789/539/3303/3304/3312	10:Monocyte	3			Whole PE	hsa05210	Colorectal cancer	84	-0.463069	-1.46337	0.00431351	0.0392756	0.029633	2752	tags=39%, list=18%, signal=33%	2475/10018/4436/3265/83439/2956/10000/5594/5291/673/1643/8313/324/5295/2932/4292/51426/5290/6934/332/836/1026/5599/6654/5601/1956/4437/4087/5894/1499/3845/596/4089	4:CTB-2	2			Whole PE	R-HSA-9711097	Cellular response to starvation	145	0.628065	2.6252	1e-10	2.82879e-09	2.30622e-09	3562	tags=70%, list=22%, signal=55%	6224/527/23521/6124/9349/6218/6128/6160/1051/6181/200916/6194/6205/11224/6129/8894/6143/9045/6209/6158/6217/6132/6125/6161/6135/81929/6152/6146/6123/6159/28956/6202/6203/6137/6147/25873/6175/11133/6167/6176/6154/6157/6208/6139/6165/8992/9550/6155/6141/6230/6193/6207/6206/7311/10542/6229/6133/6138/6189/6142/6169/6222/6171/6210/6233/6144/64223/529/6009/6168/6188/4736/6228/51382/90423/6201/6122/6227…	1:CTB	3
Whole PE	GO:0007264	small GTPase mediated signal transduction	405	0.268294	1.47279	5.43261e-05	0.0058227	0.00504105	1685	tags=20%, list=12%, signal=18%	5291/9732/93663/2885/4763/3688/3685/382/5337/55619/613/2889/6655/10211/387/7204/23607/5900/80230/58504/1902/5879/79658/6494/396/27342/9475/4650/8036/6237/11214/5898/399/3845/55667/57186/348/1796/54453/7042/2048/57568/867/55704/85440/5922/4233/10152/6714/65979/28988/5908/5894/2768/2203/89941/7126/79109/394/51306/390/83892/9693/5338/19/8615/8859/57584/11261/57698/23550/2782/79567/6654/94134/9928/10…	10:Monocyte	3			Whole PE	hsa04071	Sphingolipid signaling pathway	107	-0.457678	-1.46953	0.00480357	0.0405374	0.030585	3292	tags=37%, list=21%, signal=30%	5170/5515/581/7124/5527/624/8439/8879/81537/5337/3265/5521/1901/10000/5594/5291/5523/10558/5295/6093/2776/340485/1432/5290/91012/5529/5599/259230/5601/5894/3845/9475/596/2770/4217/5728/4363/253782/9846/55304	4:CTB-2	2			Whole PE	R-HSA-5389840	Mitochondrial translation elongation	87	0.671574	2.62358	1e-10	2.82879e-09	2.30622e-09	3882	tags=76%, list=24%, signal=58%	64981/122704/64960/79590/51318/64976/64928/51650/90480/65005/26589/64969/51258/55168/51116/51253/60488/51642/219927/7818/65008/28998/64983/64432/6182/78988/54460/51649/116541/63931/5018/64979/51073/51081/64968/55052/56945/65003/51264/51021/28957/65993/116540/51373/29093/3396/6183/10102/54948/124995/118487/51023/29088/64951/57129/29074/64975/9553/54998/28973/84545/28977/64978/63875/26284/54534	1:CTB	3
Whole PE	GO:0042773	ATP synthesis coupled electron transport	78	-0.47631	-1.83589	8.59349e-05	0.00818716	0.0070881	3129	tags=45%, list=23%, signal=35%	4708/4713/4726/983/6391/1327/11315/891/1355/4701/4710/4725/65018/1716/27089/7381/4704/246269/1340/1350/29796/4717/4731/4723/4706/4712/4707/4705/6390/4695/4722/4711/4709/4696/4716	10:Monocyte	3			Whole PE	hsa04310	Wnt signaling pathway	141	-0.432	-1.41753	0.00556777	0.0448011	0.0338019	2481	tags=30%, list=16%, signal=25%	27130/4919/5534/83439/8321/1488/1459/4775/5532/54894/144165/1452/2033/8454/4040/5467/6259/8313/324/59343/2932/85407/6934/5599/8945/818/5601/6885/1499/79718/5533/7091/8323/9475/7475/5567/8549/23291/4773/4089/5530/7088	4:CTB-2	2			Whole PE	R-HSA-5368287	Mitochondrial translation	93	0.659341	2.60088	1e-10	2.82879e-09	2.30622e-09	4580	tags=81%, list=28%, signal=58%	219402/64981/122704/64960/79590/51318/64976/64928/51650/90480/65005/26589/64969/51258/55168/51116/51253/60488/51642/219927/7818/65008/28998/64983/64432/6182/78988/54460/51649/116541/63931/5018/64979/54516/51073/51081/64968/55052/56945/65003/51264/51021/28957/65993/116540/51373/29093/3396/6183/10102/54948/124995/118487/51023/29088/64951/57129/29074/64975/9553/54998/28973/84545/28977/64978/63875/26…	1:CTB	3
Whole PE	GO:0042775	mitochondrial ATP synthesis coupled electron transport	78	-0.47631	-1.83589	8.59349e-05	0.00818716	0.0070881	3129	tags=45%, list=23%, signal=35%	4708/4713/4726/983/6391/1327/11315/891/1355/4701/4710/4725/65018/1716/27089/7381/4704/246269/1340/1350/29796/4717/4731/4723/4706/4712/4707/4705/6390/4695/4722/4711/4709/4696/4716	10:Monocyte	3			Whole PE	hsa04935	Growth hormone synthesis, secretion and action	101	-0.456289	-1.4589	0.0060139	0.0462402	0.0348876	3714	tags=36%, list=24%, signal=27%	1387/2885/108/5579/1388/115/113/2475/112/3265/10000/5335/5594/6777/5291/2033/5295/2776/3717/1432/2932/64764/5290/5599/2690/5608/1386/6654/5601/5894/3845/5747/5567/2770/6416/5336	4:CTB-2	2			Whole PE	R-HSA-168255	Influenza Infection	148	0.618077	2.58845	1e-10	2.82879e-09	2.30622e-09	3662	tags=69%, list=22%, signal=54%	6224/23521/6124/9349/5437/6218/6128/6160/6181/200916/6194/6205/11224/6129/9636/6143/3838/9045/6209/6158/5901/6217/6132/3304/6125/6161/6135/2962/81929/5439/5436/6152/6146/6123/6159/6202/6203/6137/6147/25873/6175/5435/6167/6176/3320/6154/6157/6208/6139/6165/6155/6141/6230/6193/6207/6206/7311/6229/6133/6138/6189/79023/6142/6169/6222/6171/5438/6210/6233/1211/6144/6168/6188/4736/6228/5434/6201/6122/62…	1:CTB	3
Whole PE	GO:0010257	NADH dehydrogenase complex assembly	52	-0.531685	-1.90586	0.000114274	0.00975843	0.00844843	3129	tags=52%, list=23%, signal=40%	4708/4713/55744/90871/55572/25880/4710/55471/4725/4704/57226/4717/5018/4706/126328/4712/4707/4705/51295/4695/4722/80224/4711/4709/25915/4696/4716	10:Monocyte	3			Whole PE	hsa01521	EGFR tyrosine kinase inhibitor resistance	73	-0.481545	-1.49922	0.0066433	0.0478871	0.0361302	4098	tags=47%, list=26%, signal=35%	6199/4893/6198/2885/5579/581/80310/2475/2621/10018/3265/2263/3480/10000/5335/5594/5291/673/1978/5295/2549/4763/2247/3717/2932/5290/6654/1956/4233/5894/3845/596/5336/5728	4:CTB-2	2			Whole PE	R-HSA-72662	Activation of the mRNA upon binding of the cap-binding complex and eIFs, and subsequent binding to 43S	55	0.69686	2.48951	1e-10	2.82879e-09	2.30622e-09	4466	tags=89%, list=27%, signal=65%	6224/8669/6218/6194/8668/6205/7458/10480/8894/6209/51386/6217/1973/8666/6202/6203/8667/6208/26986/6230/6193/6207/6206/6229/6189/6222/6210/6233/6188/6228/6201/6227/6232/6187/2197/6223/8662/6235/8664/6234/51065/1981/6204/1977/1965/27335/1975/3646/3921	1:CTB	3
Whole PE	GO:0032981	mitochondrial respiratory chain complex I assembly	52	-0.531685	-1.90586	0.000114274	0.00975843	0.00844843	3129	tags=52%, list=23%, signal=40%	4708/4713/55744/90871/55572/25880/4710/55471/4725/4704/57226/4717/5018/4706/126328/4712/4707/4705/51295/4695/4722/80224/4711/4709/25915/4696/4716	10:Monocyte	3			Whole PE	hsa05165	Human papillomavirus infection	252	0.354728	1.83064	1.56068e-07	2.76241e-05	1.8646e-05	2201	tags=29%, list=16%, signal=25%	5291/5315/84441/5728/2885/3688/3685/3105/6655/3107/3454/4193/23352/533/51606/8772/6696/3955/6908/5734/3133/5970/3455/3845/10000/29110/90423/3106/207/3915/5933/5610/4790/1499/7474/3914/8638/3716/5528/10474/5894/10312/9296/3696/64764/7337/55012/3678/10488/7248/4854/5529/5605/6654/4599/8321/5594/1855/7482/3659/1385/998/1857/6772/1956/8992/894/5829/7132/7059/578/1019/529	10:Monocyte	1			Whole PE	R-HSA-9692914	SARS-CoV-1-host interactions	88	0.604121	2.36218	1e-10	2.82879e-09	2.30622e-09	3261	tags=61%, list=20%, signal=49%	6224/7531/5094/6218/1915/6194/5478/6205/7314/4869/7529/3838/6209/6217/7329/7532/6202/6203/9111/3661/10465/3178/6208/57506/6230/6193/6207/6206/7311/7316/6229/6189/2280/6222/834/6210/6233/6188/6228/5479/6201/6227/2810/8737/6232/6187/2197/6223/11035/5706/6235/861/6234/51065	1:CTB	3
Whole PE	GO:0002685	regulation of leukocyte migration	170	0.332614	1.64645	0.000111417	0.00975843	0.00844843	1283	tags=21%, list=9%, signal=19%	4763/975/4282/613/79890/387/3958/5724/196527/5879/8772/5025/5734/3554/27342/3569/2358/7423/811/207/3576/6347/6868/7474/10059/6354/961/4067/3552/719/6504/101/2526/10894/10488	10:Monocyte	3			Whole PE	hsa05163	Human cytomegalovirus infection	185	0.37362	1.86197	1.07032e-06	9.47232e-05	6.39374e-05	2506	tags=38%, list=18%, signal=32%	5291/2885/3685/3105/6655/387/3107/3588/5732/1871/4193/5879/8772/5603/5734/3133/3554/9475/11214/5970/3569/3845/10000/5331/29110/3106/811/207/3576/6347/6714/4790/1499/3716/1234/6890/5530/5894/2768/3553/5533/2770/64764/54331/10488/7248/5605/2782/6654/5594/567/1385/1956/808/2923/5829/4609/5532/7132/115/578/1019/5880/1230/1232/6351/6093/1386/9564/468/2786	10:Monocyte	1			Whole PE	R-HSA-6798695	Neutrophil degranulation	394	0.433291	2.0126	1e-10	2.82879e-09	2.30622e-09	3743	tags=40%, list=23%, signal=32%	5315/5269/527/10577/10555/5879/9545/3728/1535/567/1265/25798/5709/9145/64114/10213/1915/5478/327/3326/387/2547/9961/5713/1522/2919/965/4282/10855/3310/5717/8655/7077/4831/55313/3615/976/3304/967/3163/10487/3074/5695/56954/6282/2821/8566/201294/9761/353/3958/6727/1508/4718/272/2934/9588/54509/28956/10450/9725/51316/9861/1460/54918/5701/11333/4860/2495/3320/5686/2512/2760/1992/7226/5683/203068/5878…	1:CTB	3
Whole PE	GO:0019646	aerobic electron transport chain	71	-0.480604	-1.82425	0.000196588	0.0128565	0.0111306	3129	tags=45%, list=23%, signal=35%	4708/4713/4726/6391/1327/11315/1355/4701/4710/4725/65018/27089/7381/4704/246269/1340/1350/29796/4717/4731/4723/4706/4712/4707/4705/6390/4695/4722/4711/4709/4696/4716	10:Monocyte	3			Whole PE	hsa05131	Shigellosis	206	0.338332	1.70626	5.9867e-06	0.000264911	0.000178813	1757	tags=25%, list=13%, signal=22%	5291/2309/960/23291/3688/10552/382/26100/23048/10318/387/4193/5879/55062/5603/10109/3554/824/9475/7094/5970/10000/7099/5331/29110/664/114548/3098/207/3576/3611/3606/7416/6714/4790/8454/3553/103910/3678/84557/9140/6500/5216/989/929/7335/7322/5594/55072/4615/8945/30849	10:Monocyte	1			Whole PE	R-HSA-163200	Respiratory electron transport, ATP synthesis by chemiosmotic coupling, and heat production by uncoupling proteins.	111	0.561922	2.26585	1.08661e-10	2.99694e-09	2.44331e-09	4850	tags=73%, list=30%, signal=52%	91942/515/55967/4725/4718/4696/7388/7381/10476/9551/55744/51103/509/521/51295/6341/1340/4700/539/9997/27089/54205/29078/514/51079/4712/4715/9377/4710/4728/516/10131/10632/7385/4709/4731/1329/6834/4697/1327/7351/10975/29796/1350/518/4704/4717/6392/4722/9167/4720/7350/4726/4706/4702/4701/1351/4695/25880/51241/2109/2108/1337/522/517/4708/51300/513/4724/374291/1353/4716/116228/4707/4713/1345/4729/471…	1:CTB	3
Whole PE	GO:0006754	ATP biosynthetic process	84	-0.456486	-1.77656	0.000216071	0.0137803	0.0119304	3230	tags=48%, list=24%, signal=37%	10891/4708/4713/516/4726/6391/9605/514/506/4701/4710/515/4725/498/65018/55811/4704/9551/522/4717/4731/4723/10632/4706/126328/4712/4707/4705/521/517/6390/4695/27109/4722/509/4711/4709/4696/4716/539	10:Monocyte	3			Whole PE	hsa04662	B cell receptor signaling pathway	74	0.464821	1.99481	2.23255e-05	0.000692593	0.000467495	1622	tags=35%, list=12%, signal=31%	5291/2885/975/6655/5879/10859/5970/3845/10000/11006/207/4790/5530/84433/5894/4067/5533/971/2213/118788/11027/6850/5605/6654/10990/5594	10:Monocyte	1			Whole PE	R-HSA-611105	Respiratory electron transport	90	0.567143	2.22406	8.77624e-09	1.6223e-07	1.32261e-07	4574	tags=70%, list=28%, signal=51%	91942/55967/4725/4718/4696/7388/7381/55744/51103/51295/6341/1340/4700/9997/27089/54205/29078/51079/4712/4715/9377/4710/4728/10131/7385/4709/4731/1329/6834/4697/1327/10975/29796/1350/4704/4717/6392/4722/9167/4720/4726/4706/4702/4701/1351/4695/25880/51241/2109/2108/1337/4708/51300/4724/374291/1353/4716/116228/4707/4713/1345/4729/4711	1:CTB	3
Whole PE	GO:0071222	cellular response to lipopolysaccharide	168	0.318248	1.56344	0.00041872	0.0201018	0.0174033	2261	tags=32%, list=17%, signal=27%	7431/4282/10318/613/387/5724/824/10859/2919/5970/3569/7097/2920/2921/7099/114548/3656/207/3576/2048/140885/6347/55829/6714/4790/7474/1234/92140/4067/3553/3032/3552/9373/968/706/5142/942/19/7128/11027/941/929/5594/4615/11213/2635/1910/654/8106/5599/1019/4795/79577	10:Monocyte	3			Whole PE	hsa05132	Salmonella infection	216	0.332051	1.68358	1.9743e-05	0.000692593	0.000467495	2578	tags=35%, list=19%, signal=29%	5291/6281/112574/10552/382/79026/9648/387/84617/2597/5879/8772/51429/302/5603/10109/9475/6237/5970/3569/7097/5898/399/10000/7099/114548/203068/207/3576/3606/4790/7184/1499/329/5894/3553/57617/103910/79443/7295/3799/3840/5878/6500/26263/10006/5605/5216/929/55823/5594/4615/23339/10540/998/84516/65082/4609/10095/7132/5599/10121/578/64746/5289/51164/9842/6993/23265/114609/6932/3831/5869/4636/27072	10:Monocyte	1			Whole PE	R-HSA-449147	Signaling by Interleukins	391	0.365816	1.69723	1.68528e-07	2.64405e-06	2.15561e-06	4093	tags=38%, list=25%, signal=29%	2920/5692/6624/282617/301/1265/6647/6778/5709/3726/5685/7334/5518/5710/10213/5478/7132/1846/6888/5595/5713/7314/2919/4282/5717/3162/7335/5700/5695/2353/9466/5682/5684/6627/998/3576/6500/5690/332/7422/5687/3383/6175/1439/9861/5688/8878/1230/4793/6352/5701/5691/10197/5704/3320/246778/5686/51561/6774/5683/5898/6950/3606/5721/9049/948/10148/4067/3554/3552/5714/6464/5689/7311/7979/7316/59307/4609/2376…	1:CTB	3
Whole PE	GO:0006120	mitochondrial electron transport, NADH to ubiquinone	41	-0.5493	-1.89993	0.000447273	0.0201981	0.0174867	3129	tags=54%, list=23%, signal=41%	4708/4713/4726/11315/4701/4710/4725/65018/4704/4717/4731/4723/4706/4712/4707/4705/4695/4722/4711/4709/4696/4716	10:Monocyte	3			Whole PE	hsa04151	PI3K-Akt signaling pathway	252	0.309492	1.5972	3.09137e-05	0.000839476	0.00056664	2032	tags=25%, list=15%, signal=22%	5291/23533/2309/5728/56034/2885/3688/3685/2069/2260/6655/3454/4193/1902/5879/6696/7531/5970/3569/7097/3455/3845/10000/7099/7423/207/3915/3575/7533/4233/4790/7184/3914/3716/5528/5894/3696/64764/54331/55012/3678/10488/23239/118788/7248/2057/6850/1946/5529/5605/2782/6654/6256/5594/3082/9170/3480/7534/1385/1956/894/1442/4609	10:Monocyte	1			Whole PE	R-HSA-389958	Cooperation of Prefoldin and TriC/CCT in actin and tubulin folding	24	0.711145	2.124	9.39933e-06	0.000117775	9.60186e-05	4572	tags=92%, list=28%, signal=66%	7277/7280/10381/5204/84790/10471/6950/908/7846/5203/10383/10694/7203/5202/10576/10376/22948/84617/5201/10574/10575/60	1:CTB	3
Whole PE	GO:0009142	nucleoside triphosphate biosynthetic process	106	-0.421843	-1.7016	0.00045553	0.0201981	0.0174867	3230	tags=42%, list=24%, signal=33%	10891/4708/4713/516/4726/1841/6391/9605/514/506/4701/4710/515/4725/50808/498/65018/55811/4704/9551/4830/522/4717/4731/4723/10632/4706/126328/129607/4712/4707/4705/521/517/6390/4695/27109/4722/509/4711/4709/4696/4716/539/7371	10:Monocyte	3			Whole PE	hsa05230	Central carbon metabolism in cancer	59	0.490853	2.02186	3.90204e-05	0.000863326	0.000582739	2032	tags=36%, list=15%, signal=30%	5291/5315/5223/5728/2260/3939/5163/9123/3845/10000/3098/207/4233/5894/9997/5605/5594/5214/3091/1956/4609	10:Monocyte	1			Whole PE	R-HSA-6799198	Complex I biogenesis	49	0.586756	2.03889	1.10386e-05	0.000136484	0.000111271	4574	tags=73%, list=28%, signal=53%	91942/55967/4725/4718/4696/55744/51103/51295/4700/29078/51079/4712/4715/4710/4728/4709/4731/4704/4717/4722/4720/4726/4706/4702/4701/4695/25880/4708/51300/4724/374291/4716/4707/4713/4729/4711	1:CTB	3
Whole PE	GO:0009206	purine ribonucleoside triphosphate biosynthetic process	93	-0.427477	-1.69536	0.000572532	0.0230116	0.0199225	3230	tags=44%, list=24%, signal=34%	10891/4708/4713/516/4726/6391/9605/514/506/4701/4710/515/4725/498/65018/55811/4704/9551/4830/522/4717/4731/4723/10632/4706/126328/4712/4707/4705/521/517/6390/4695/27109/4722/509/4711/4709/4696/4716/539	10:Monocyte	3			Whole PE	hsa05220	Chronic myeloid leukemia	72	0.451902	1.91662	5.37197e-05	0.00111863	0.000755069	2184	tags=36%, list=16%, signal=30%	5291/2885/613/6655/1871/4193/5970/3845/10000/7048/7040/207/7042/861/867/4790/5894/6777/5605/6654/5594/4089/6464/4609/578/1019	10:Monocyte	1			Whole PE	R-HSA-389957	Prefoldin mediated transfer of substrate to CCT/TriC	22	0.712636	2.08678	2.137e-05	0.000254126	0.000207181	4572	tags=95%, list=28%, signal=69%	7277/7280/10381/5204/84790/10471/6950/908/7846/5203/10383/10694/7203/5202/10576/22948/84617/5201/10574/10575/60	1:CTB	3
Whole PE	GO:0009201	ribonucleoside triphosphate biosynthetic process	98	-0.422539	-1.69335	0.000613805	0.0240474	0.0208192	3230	tags=48%, list=24%, signal=37%	201163/30968/4831/513/790/10891/4708/4713/516/4726/6391/9605/514/506/4701/4710/515/4725/498/65018/55811/4704/9551/4830/522/4717/4731/4723/10632/4706/126328/4712/4707/4705/521/517/6390/4695/27109/4722/509/4711/4709/4696/4716/539/7371	10:Monocyte	3			Whole PE	hsa05144	Malaria	38	0.559139	2.09423	7.81164e-05	0.00153629	0.00103698	1832	tags=45%, list=13%, signal=39%	975/6383/3569/7097/7099/7040/7042/3576/4035/6347/3606/4233/1378/3553/3082/4615/5175	10:Monocyte	1			Whole PE	R-HSA-3247509	Chromatin modifying enzymes	184	-0.352331	-1.68256	6.8816e-05	0.000783411	0.00063869	3307	tags=41%, list=20%, signal=33%	64754/9869/79595/6599/64426/5926/1788/84159/2033/79960/11143/51147/84787/51742/117143/64324/26610/51230/55689/1107/51780/80853/339287/23774/51317/22992/79813/6602/8648/9219/57504/55250/10196/23512/5928/10499/27097/54496/55683/58508/79685/55578/23186/55193/56950/121536/84864/23522/79718/7994/23081/57459/196528/55870/9611/51111/9070/84193/80314/9575/8850/54014/8295/6871/57492/5253/1386/9682/4297/65…	1:CTB	3
Whole PE	GO:0009145	purine nucleoside triphosphate biosynthetic process	94	-0.421698	-1.67593	0.000671909	0.0254173	0.0220052	3230	tags=44%, list=24%, signal=33%	10891/4708/4713/516/4726/6391/9605/514/506/4701/4710/515/4725/498/65018/55811/4704/9551/4830/522/4717/4731/4723/10632/4706/126328/4712/4707/4705/521/517/6390/4695/27109/4722/509/4711/4709/4696/4716/539	10:Monocyte	3			Whole PE	hsa04148	Efferocytosis	134	0.354049	1.66707	0.000190922	0.0025032	0.00168964	2777	tags=38%, list=20%, signal=31%	55754/3685/489/24145/8877/5732/196527/89790/5879/5603/5734/7040/811/4035/140885/6868/961/57617/203859/10461/5878/286046/714/19/51552/2057/5605/4240/55823/6256/5594/3091/23339/5175/1385/23166/65082/29933/26762/5468/10396/817/9564/5869/27072/3988/9261/5781/3586/2621/80824	10:Monocyte	1			Whole PE	R-HSA-4839726	Chromatin organization	184	-0.352331	-1.68256	6.8816e-05	0.000783411	0.00063869	3307	tags=41%, list=20%, signal=33%	64754/9869/79595/6599/64426/5926/1788/84159/2033/79960/11143/51147/84787/51742/117143/64324/26610/51230/55689/1107/51780/80853/339287/23774/51317/22992/79813/6602/8648/9219/57504/55250/10196/23512/5928/10499/27097/54496/55683/58508/79685/55578/23186/55193/56950/121536/84864/23522/79718/7994/23081/57459/196528/55870/9611/51111/9070/84193/80314/9575/8850/54014/8295/6871/57492/5253/1386/9682/4297/65…	1:CTB	3
Whole PE	GO:0000027	ribosomal large subunit assembly	22	-0.627786	-1.86078	0.00166543	0.0462242	0.040019	3197	tags=59%, list=24%, signal=45%	29960/6135/6147/55052/29997/22907/55299/84231/6152/6125/84154/6169/23195	10:Monocyte	3			Whole PE	hsa05211	Renal cell carcinoma	64	0.448625	1.86688	0.000203476	0.00257252	0.00173643	1847	tags=33%, list=14%, signal=28%	5291/2885/2889/6655/5879/3845/10000/7040/207/7042/4233/10298/5908/5894/2113/5605/6654/5594/3091/3082/998	10:Monocyte	1			Whole PE	R-HSA-3371568	Attenuation phase	14	0.771914	1.99709	0.000122409	0.00134434	0.00109599	2383	tags=71%, list=15%, signal=61%	3326/3304/3297/2288/3281/3320/10728/3337/3306/3312	1:CTB	3
Whole PE	GO:0071216	cellular response to biotic stimulus	198	0.291513	1.47554	0.00169328	0.0463371	0.0401167	1728	tags=25%, list=13%, signal=22%	7431/4282/10318/613/196/387/5724/824/10859/2919/5970/3569/7097/2920/2921/7099/114548/3656/207/3576/2048/140885/6347/55829/6714/4790/7474/1234/92140/4067/3553/3032/3552/9373/968/2213/706/7096/5142/942/19/7128/11027/6850/941/929/5594/4615/11213	10:Monocyte	3			Whole PE	hsa05212	Pancreatic cancer	72	0.427489	1.81308	0.000217006	0.00264897	0.00178804	2206	tags=39%, list=16%, signal=33%	5291/5337/1871/5900/5879/5970/5898/3845/10000/7048/7040/207/7042/4790/3716/5894/5338/5594/675/998/4089/6772/1956/10928/5599/578/1019/5880	10:Monocyte	1			Whole PE	R-HSA-6783783	Interleukin-10 signaling	35	0.57441	1.87092	0.000373351	0.00374756	0.00305526	3697	tags=49%, list=23%, signal=38%	2920/7132/2919/3576/3383/1230/6352/6774/3606/3554/3552/3587/942/7133/3588/7850/2357	1:CTB	3
Whole PE	GO:0042254	ribosome biogenesis	292	-0.458908	-2.10244	1e-10	2.57233e-07	2.22702e-07	2559	tags=37%, list=19%, signal=30%	55226/9326/84864/55153/6147/51388/23016/4869/51119/51118/2971/57418/6234/27292/6189/4927/6201/10200/130916/6229/6202/10557/11224/10412/6165/55052/29997/6227/26164/6210/22907/55759/6059/6130/4736/6230/10528/6193/2752/65080/55646/128061/708/55299/3921/64745/51335/6205/84231/9045/6208/6154/23223/51575/5591/6152/92342/6207/6155/153443/6125/29102/54555/79863/51187/92856/55651/51116/2483/84154/8886/259…	10:Monocyte	2			Whole PE	hsa04933	AGE-RAGE signaling pathway in diabetic complications	83	0.413067	1.81229	0.000244862	0.00273392	0.00184537	2274	tags=36%, list=17%, signal=30%	5291/5879/5603/5970/3569/3845/10000/5331/7048/7423/7040/7056/207/7042/3576/6347/4790/2152/3553/3552/6777/5594/998/4089/6772/5599/5580/1019/5292/2335	10:Monocyte	1			Whole PE	R-HSA-1483255	PI Metabolism	78	-0.414545	-1.71544	0.00121961	0.0108429	0.00883989	3300	tags=37%, list=20%, signal=30%	79837/5291/5295/23396/9896/65977/25816/5297/5286/9110/81846/54545/8394/54893/5867/5289/84725/30849/200576/5290/59338/23760/66036/3631/22908/8395/8867/5728/55300	1:CTB	3
Whole PE	GO:0022613	ribonucleoprotein complex biogenesis	426	-0.438478	-2.07058	1e-10	2.57233e-07	2.22702e-07	2576	tags=35%, list=19%, signal=29%	79760/7536/55226/9326/84864/55153/6147/51388/23016/4869/10291/8664/51119/51118/2971/57418/6234/8667/27292/6189/4927/6201/10200/130916/6229/6202/10557/91746/11224/10412/9879/6165/55052/29997/10856/6227/10419/26164/545/6210/22907/55759/6059/6130/27335/4736/6230/51639/1939/10528/51386/6193/2752/65080/8175/55646/128061/708/55299/3921/8663/6635/64745/51335/6205/84231/8669/9045/6208/6154/23223/51575/55…	10:Monocyte	2			Whole PE	hsa05418	Fluid shear stress and atherosclerosis	115	0.359688	1.64911	0.000256637	0.00275301	0.00185826	1538	tags=27%, list=11%, signal=24%	5291/1514/3685/6383/387/9446/5598/5879/5603/3554/92/5970/4259/10000/7056/207/6347/6385/6714/4790/7184/1499/3553/3552/7295/1535/659/4257/119391/6612/4217	10:Monocyte	1			Whole PE	R-HSA-5419276	Mitochondrial translation termination	87	0.529438	2.49099	1.22591e-10	7.68944e-09	5.87371e-09	3879	tags=61%, list=25%, signal=46%	122704/64976/64981/90480/7818/55168/3396/28998/29088/64983/64968/51650/55052/51253/64960/51021/51023/51318/116541/51373/54460/29093/116540/65003/56945/78988/51264/5018/57129/54948/64928/9553/51081/51642/65005/64969/64979/64951/64975/219927/51116/65008/28957/92259/118487/79590/64978/54516/51649/51258/51069/55173/54148	4:CTB-2	3
Whole PE	GO:0006457	protein folding	185	-0.487404	-2.11843	1.7503e-10	3.37677e-07	2.92347e-07	2319	tags=36%, list=17%, signal=30%	169714/90624/79031/9532/60681/131118/3305/3300/972/22824/10491/5203/10450/10856/131474/7265/121506/27433/10283/53938/25764/9360/200558/55664/10954/9049/134492/10574/1155/5481/219899/7266/3315/4820/3308/11080/6767/908/64772/2288/10471/10728/56886/10598/10961/10576/10808/3313/10049/7203/3329/3303/55466/3320/3326/5202/3336/10575/6950/3304/10726/3310/3312/3337/9531/3301/26973	10:Monocyte	2			Whole PE	hsa05166	Human T-cell leukemia virus 1 infection	196	0.311819	1.55678	0.000282301	0.00285527	0.00192729	2184	tags=29%, list=16%, signal=24%	5291/5728/8295/3601/3105/3107/1871/821/1959/6908/3133/3554/2224/996/7094/5970/3569/3845/10000/7048/7040/2005/3106/811/207/7042/7416/4790/3716/5530/5971/29945/5533/64764/706/246184/6929/10488/55697/6777/2113/5605/51529/5594/567/1385/4089/7417/894/4609/5532/7132/3559/115/5599/1019	10:Monocyte	1			Whole PE	R-HSA-5368286	Mitochondrial translation initiation	87	0.523758	2.46427	2.30368e-10	1.33287e-08	1.01813e-08	3292	tags=54%, list=21%, signal=43%	219402/122704/64976/64981/90480/7818/55168/3396/28998/29088/64983/64968/51650/55052/51253/64960/51021/51023/51318/116541/51373/54460/29093/116540/65003/56945/78988/51264/5018/57129/54948/64928/9553/51081/51642/65005/64969/64979/64951/64975/219927/51116/65008/28957/92259/118487/79590	4:CTB-2	3
Whole PE	GO:0034470	ncRNA processing	388	-0.394302	-1.84901	7.02774e-10	7.74758e-07	6.70753e-07	2559	tags=30%, list=19%, signal=25%	55226/9326/55253/79650/10269/23016/51119/161829/51118/57418/6234/79074/27292/6201/10200/130916/6229/6202/142940/10557/11224/23536/10412/51605/134637/6165/10667/29997/6227/79828/91801/55759/6130/3181/152992/4736/6230/80324/10785/10528/65080/51574/81627/55646/55299/389421/54482/81605/54522/9045/6208/6154/23223/9631/51575/5591/92342/6155/153443/6125/29102/54555/57570/441250/79042/65123/79863/92856/5…	10:Monocyte	2			Whole PE	hsa04917	Prolactin signaling pathway	56	0.450104	1.81853	0.000409679	0.00371863	0.00251005	2150	tags=39%, list=16%, signal=33%	5291/2309/2885/6655/5603/5970/3845/10000/207/6714/4790/5894/30837/6777/5605/6654/5594/3659/6464/6772/894/5599	10:Monocyte	1			Whole PE	R-HSA-5389840	Mitochondrial translation elongation	87	0.515881	2.4272	4.9522e-10	2.50224e-08	1.91138e-08	3292	tags=53%, list=21%, signal=42%	122704/64976/64981/90480/7818/55168/3396/28998/29088/64983/64968/51650/55052/51253/64960/51021/51023/51318/116541/51373/54460/29093/116540/65003/56945/78988/51264/5018/57129/54948/64928/9553/51081/51642/65005/64969/64979/64951/64975/219927/51116/65008/28957/92259/118487/79590	4:CTB-2	3
Whole PE	GO:0006364	rRNA processing	208	-0.44798	-1.98083	6.81069e-09	5.83979e-06	5.05584e-06	2559	tags=35%, list=19%, signal=29%	55226/9326/23016/51119/51118/57418/6234/27292/6201/10200/130916/6229/6202/10557/11224/10412/6165/29997/6227/55759/6130/4736/6230/10528/65080/55646/55299/9045/6208/6154/23223/51575/5591/92342/6155/153443/6125/29102/54555/79863/92856/55651/2483/84154/8886/25983/55695/6218/6129/8850/10775/51504/23481/55127/4809/11157/404672/2091/23076/29081/9775/79033/28987/64282/9221/55661/9188/23160/65095/26156/57…	10:Monocyte	2			Whole PE	hsa05130	Pathogenic Escherichia coli infection	160	0.330102	1.6213	0.000401093	0.00371863	0.00251005	978	tags=18%, list=7%, signal=17%	64005/3688/10552/382/387/84617/7009/147179/2597/9871/1902/5879/8772/5603/10109/3554/9475/5970/3569/8440/7099/114548/203068/3576/3606/6714/4790/2768/3553	10:Monocyte	1			Whole PE	R-HSA-72662	Activation of the mRNA upon binding of the cap-binding complex and eIFs, and subsequent binding to 43S	55	0.621505	2.59444	1.11886e-09	5.21848e-08	3.98623e-08	3264	tags=69%, list=21%, signal=55%	6224/8668/6206/6194/6230/6207/6205/6209/6189/8667/8669/6227/6193/6208/8666/6210/7458/6204/8894/6228/6233/6201/6229/51386/6203/10480/6222/6202/6232/2197/6217/6234/6235/1981/6223/6188/27335/6218	4:CTB-2	3
Whole PE	GO:0016072	rRNA metabolic process	240	-0.42895	-1.92212	2.3381e-08	1.80431e-05	1.56209e-05	2424	tags=33%, list=18%, signal=28%	23016/6597/51119/51118/2971/57418/6234/84186/27292/6201/10200/130916/6229/112495/6202/10557/11224/10412/6165/29997/6227/55759/6130/4736/6230/10528/65080/55646/55299/9045/6208/6154/23223/51575/6949/5591/92342/6155/153443/6125/29102/54555/55106/79863/92856/55651/2483/84154/8886/25983/84172/55695/6218/6129/8850/10775/51504/23481/55127/7157/4809/11157/2475/404672/2091/23076/29081/9775/79033/162989/28…	10:Monocyte	2			Whole PE	hsa04722	Neurotrophin signaling pathway	98	0.382598	1.72158	0.000524075	0.00455812	0.0030767	2660	tags=40%, list=20%, signal=32%	5291/2309/2885/2889/6655/387/5598/5879/396/5603/7531/5970/3845/10000/3656/6196/207/4790/5908/5894/5605/6654/4217/25970/5594/11213/998/6464/808/6272/5599/5580/817/4214/11108/468/57498/9261/5781	10:Monocyte	1			Whole PE	R-HSA-5368287	Mitochondrial translation	93	0.494555	2.34429	3.1951e-09	1.41753e-07	1.08281e-07	3292	tags=51%, list=21%, signal=40%	219402/122704/64976/64981/90480/7818/55168/3396/28998/29088/64983/64968/51650/55052/51253/64960/51021/51023/51318/116541/51373/54460/29093/116540/65003/56945/78988/51264/5018/57129/54948/64928/9553/51081/51642/65005/64969/64979/64951/64975/219927/51116/65008/28957/92259/118487/79590	4:CTB-2	3
Whole PE	GO:0001525	angiogenesis	372	0.322714	1.7659	4.96169e-08	2.73495e-05	2.36781e-05	1917	tags=25%, list=14%, signal=22%	5291/28996/5315/1890/1545/4763/3688/5797/3685/2896/2069/290/57007/387/9146/8877/5598/58504/6672/8828/302/2683/22846/9475/6237/2004/2022/3569/51129/4327/10000/51162/6461/7048/7423/7040/4814/207/7042/3576/2048/861/56005/6347/3606/83605/10298/2152/1499/7474/3716/29072/961/9990/92140/28984/51330/3696/694/161742/3553/10519/3552/719/80025/26051/101/3678/1317/64855/1605/7128/6850/2113/4854/80781/9525/42…	10:Monocyte	2			Whole PE	hsa00604	Glycosphingolipid biosynthesis - ganglio series	12	0.74474	2.04134	0.000806074	0.00648523	0.00437748	1694	tags=42%, list=12%, signal=37%	27090/6483/6482/8705/30815	10:Monocyte	1			Whole PE	R-HSA-163200	Respiratory electron transport, ATP synthesis by chemiosmotic coupling, and heat production by uncoupling proteins.	110	0.452467	2.12653	4.00796e-09	1.65693e-07	1.26567e-07	2371	tags=41%, list=15%, signal=35%	4725/515/7388/27089/9377/4696/51103/51295/55967/10476/4718/7381/10975/51079/539/7351/4710/9997/9551/514/116228/91942/509/4711/4700/4695/55863/1337/1340/4712/54205/1329/10632/84987/4709/4704/4722/4715/4714/521/4728/2108/4707/55744/1353	4:CTB-2	3
Whole PE	GO:0140053	mitochondrial gene expression	159	-0.468439	-2.00445	9.96907e-08	4.80821e-05	4.16274e-05	3403	tags=47%, list=25%, signal=35%	92170/79736/64432/29088/57129/60488/55173/124995/122704/64960/9553/7019/64969/54938/85476/64978/51650/55699/51373/51263/51253/4701/51073/285367/64949/130916/64979/84311/84300/10128/55052/65993/26164/79590/79828/116541/28977/400916/80324/133522/65080/708/64975/9801/51335/64983/28957/7978/55278/65005/64965/57570/65003/23107/63931/51116/6150/10352/51258/219402/11222/78988/115416/29074/28998/54460/65…	10:Monocyte	2			Whole PE	hsa04068	FoxO signaling pathway	111	0.353638	1.618	0.000873277	0.00686978	0.00463705	721	tags=17%, list=5%, signal=16%	5291/2309/5728/2885/6655/11345/6648/4193/5603/3569/3845/10000/7048/664/7040/207/7042/1454/3575	10:Monocyte	1			Whole PE	R-HSA-611105	Respiratory electron transport	90	0.438917	2.13805	2.60328e-07	6.31383e-06	4.82293e-06	2371	tags=40%, list=15%, signal=34%	4725/7388/27089/9377/4696/51103/51295/55967/4718/7381/10975/51079/4710/9997/116228/91942/4711/4700/4695/55863/1337/1340/4712/54205/1329/84987/4709/4704/4722/4715/4714/4728/2108/4707/55744/1353	4:CTB-2	3
Whole PE	GO:0009408	response to heat	80	-0.538407	-2.08514	7.52369e-07	0.000245007	0.000212116	751	tags=24%, list=6%, signal=23%	7266/3315/8892/11080/2475/472/10049/51501/3303/55466/3320/3326/51278/3304/3310/3337/9531/3301/26973	10:Monocyte	2			Whole PE	hsa04936	Alcoholic liver disease	102	0.356623	1.62625	0.000959857	0.00722956	0.0048799	1831	tags=25%, list=13%, signal=22%	2309/37/51094/8772/5603/2919/5970/3569/2920/10000/2921/7099/29110/207/3576/9663/4790/1499/3553/719/223/714/4217/929/4615/5465	10:Monocyte	1			Whole PE	R-HSA-3247509	Chromatin modifying enzymes	182	-0.49906	-1.64659	4.26592e-07	9.46306e-06	7.22852e-06	4578	tags=55%, list=29%, signal=39%	26610/112869/55250/51562/84678/79723/10933/6605/121536/284058/27154/79685/9112/23326/5927/10362/339287/1387/8518/54496/64426/84159/23522/9682/79960/54904/11143/56950/8726/55929/5928/10919/8819/54556/6314/387893/10902/8841/57459/55140/9612/54815/8464/86/5926/9611/1107/4297/84289/23081/55683/55729/55167/57634/9869/2033/8648/5253/64754/9575/1810/64324/51742/79813/6599/55578/22992/8289/84193/3717/230…	4:CTB-2	3
Whole PE	GO:1901342	regulation of vasculature development	199	0.360565	1.83185	9.26389e-07	0.000285958	0.00024757	1964	tags=27%, list=14%, signal=24%	5291/28996/5315/1545/4763/3688/5797/2896/9146/8877/5598/6672/22846/9475/6237/2022/3569/51129/10000/7048/7423/4814/7042/3576/861/56005/83605/10298/2152/1499/7474/3716/92140/28984/3696/694/161742/3553/3552/719/26051/3678/64855/7128/2113/10553/27161/3091/6678/284361/29924/2969/6772/23166	10:Monocyte	2			Whole PE	hsa04926	Relaxin signaling pathway	96	0.363474	1.63326	0.00106378	0.0076853	0.00518752	2570	tags=38%, list=19%, signal=31%	5291/2885/6655/5603/5970/3845/10000/5331/7048/7423/7040/207/6714/4790/5894/2770/64764/54331/10488/5605/2782/6654/5594/59/1385/1910/6464/1956/115/5599/2769/1386/468/2786/1281/1282	10:Monocyte	1			Whole PE	R-HSA-4839726	Chromatin organization	182	-0.49906	-1.64659	4.26592e-07	9.46306e-06	7.22852e-06	4578	tags=55%, list=29%, signal=39%	26610/112869/55250/51562/84678/79723/10933/6605/121536/284058/27154/79685/9112/23326/5927/10362/339287/1387/8518/54496/64426/84159/23522/9682/79960/54904/11143/56950/8726/55929/5928/10919/8819/54556/6314/387893/10902/8841/57459/55140/9612/54815/8464/86/5926/9611/1107/4297/84289/23081/55683/55729/55167/57634/9869/2033/8648/5253/64754/9575/1810/64324/51742/79813/6599/55578/22992/8289/84193/3717/230…	4:CTB-2	3
Whole PE	GO:0042026	protein refolding	24	-0.743396	-2.25852	1.16533e-06	0.0003214	0.000278254	157	tags=42%, list=1%, signal=41%	3315/3313/3329/3303/55466/3320/3304/3310/3312/3301	10:Monocyte	2			Whole PE	hsa05142	Chagas disease	85	0.37462	1.65722	0.00117743	0.00795691	0.00537085	1034	tags=22%, list=8%, signal=21%	5291/8772/5603/5970/3569/7097/10000/7099/5331/7048/7040/811/207/7042/3576/6347/4790/3553/2770	10:Monocyte	1			Whole PE	R-HSA-9692914	SARS-CoV-1-host interactions	88	0.422156	2.01185	4.25161e-06	7.3654e-05	5.62618e-05	2534	tags=48%, list=16%, signal=40%	6224/2810/7314/6206/6194/7532/6230/6207/6205/5094/6209/6189/6227/6193/6208/6210/1915/6204/9111/4869/3661/6228/6233/6201/6229/6203/7531/57506/857/6222/6202/11123/5478/6232/5479/7316/2197/2280/7311/6217/6234/4792	4:CTB-2	3
Whole PE	GO:0045765	regulation of angiogenesis	197	0.364299	1.83815	1.22865e-06	0.0003214	0.000278254	1964	tags=27%, list=14%, signal=24%	5291/28996/5315/1545/4763/3688/5797/2896/9146/8877/5598/6672/22846/9475/6237/2022/3569/51129/10000/7048/7423/4814/7042/3576/861/56005/83605/10298/2152/1499/7474/3716/92140/28984/3696/694/161742/3553/3552/719/26051/3678/64855/7128/2113/10553/27161/3091/6678/284361/29924/2969/6772/23166	10:Monocyte	2			Whole PE	hsa04062	Chemokine signaling pathway	148	0.323276	1.54885	0.00114554	0.00795691	0.00537085	2506	tags=33%, list=18%, signal=27%	5291/23533/2309/2885/6655/387/5879/9475/2919/5970/3845/2920/10000/2921/5331/207/3576/6347/6714/4790/6354/1234/3702/5908/5894/4067/2770/54331/6777/2782/6654/5594/998/6464/6772/2869/5829/115/5580/5880/1230/58191/1232/2268/6351/6093/9564/6364/2786	10:Monocyte	1			Whole PE	R-HSA-6799198	Complex I biogenesis	49	0.467773	1.91636	0.000142193	0.0017129	0.00130843	2331	tags=45%, list=15%, signal=38%	4725/4696/51103/51295/55967/4718/51079/4710/91942/4711/4700/4695/55863/4712/4709/4704/4722/4715/4714/4728/4707/55744	4:CTB-2	3
Whole PE	GO:0051084	'de novo' post-translational protein folding	35	-0.667372	-2.23833	1.32263e-06	0.000329249	0.00028505	751	tags=40%, list=6%, signal=38%	7266/11080/6767/10728/56886/10576/10808/3313/3303/3336/3304/3310/3312/3337	10:Monocyte	2			Whole PE	hsa05206	MicroRNAs in cancer	142	0.322104	1.5381	0.00119129	0.00795691	0.00537085	2032	tags=23%, list=15%, signal=20%	5291/960/9839/7431/5728/1545/2885/6655/387/4082/5598/1871/4193/3845/7042/4233/10298/4790/599/5894/5328/659/3678/1946/4854/5605/6654/5594/6464/5962/1956/894/4609	10:Monocyte	1			Whole PE	R-HSA-1483255	PI Metabolism	78	-0.539693	-1.68628	0.000154207	0.00184541	0.00140964	3098	tags=40%, list=20%, signal=32%	81846/65977/9896/5868/5287/64419/56623/66036/51552/8871/8897/84725/23760/5291/9110/25816/5295/200576/3631/9107/8394/5290/54893/22908/54545/8867/59338/5728/3635/8395/55300	4:CTB-2	3
Whole PE	GO:0009060	aerobic respiration	156	-0.440064	-1.87717	1.75216e-06	0.000409739	0.000354735	2908	tags=42%, list=21%, signal=34%	130752/4726/983/6391/3418/1327/11315/514/4436/4191/506/402/891/1355/4701/4710/515/7124/84300/4725/29997/498/65018/1716/27089/400916/7381/4704/246269/92259/9551/3417/205327/8801/1340/3419/1350/522/29796/3416/4717/4731/4723/6834/10632/5018/8802/4706/126328/4712/4707/847/4705/521/6390/4695/4722/1352/509/4711/863/84275/4709/4696/4716/539	10:Monocyte	2			Whole PE	hsa05218	Melanoma	53	0.439181	1.75048	0.00232816	0.0147173	0.00993406	2184	tags=36%, list=16%, signal=30%	5291/5728/56034/2260/1871/4193/3845/10000/4286/207/4233/5894/5605/5594/3082/3480/1956/578/1019	10:Monocyte	1			Whole PE	R-HSA-389957	Prefoldin mediated transfer of substrate to CCT/TriC	23	0.570918	1.98006	0.000739761	0.00666151	0.00508851	3595	tags=57%, list=23%, signal=44%	7280/7277/7203/5204/5203/10381/7846/10383/10576/10471/10694/5202/10574	4:CTB-2	3
Whole PE	GO:2001234	negative regulation of apoptotic signaling pathway	178	0.371646	1.8444	2.21346e-06	0.000502391	0.000434949	2507	tags=36%, list=18%, signal=30%	5291/117584/960/3685/4282/3622/57007/3958/1495/7009/5598/6648/55031/4193/3064/8682/2023/23028/5970/9821/64114/2907/207/2537/55829/6714/1499/599/29949/5894/50484/3553/3552/4976/25793/10488/1459/7128/8321/5770/2730/3091/3082/10525/754/2729/9529/26155/5071/4000/7417/8996/27429/56624/578/2266/10449/51530/1032/55023/2534/246330/468/84447	10:Monocyte	2			Whole PE	hsa04666	Fc gamma R-mediated phagocytosis	90	0.356713	1.59751	0.00260265	0.0158851	0.0107223	2206	tags=31%, list=16%, signal=26%	5291/10552/382/5337/4082/8877/5879/10109/8613/65108/10000/207/50807/5894/4067/2213/5338/274/6850/5594/2214/998/8611/23396/10095/1072/5580/5880	10:Monocyte	1			Whole PE	R-HSA-389958	Cooperation of Prefoldin and TriC/CCT in actin and tubulin folding	25	0.510009	1.82524	0.00195713	0.0153449	0.0117215	3293	tags=52%, list=21%, signal=41%	7280/7277/7203/5204/5203/10381/7846/10383/51807/10576/10471/10694/5202	4:CTB-2	3
Whole PE	GO:0051085	chaperone cofactor-dependent protein refolding	30	-0.67371	-2.16867	7.8731e-06	0.00143559	0.00124287	751	tags=40%, list=6%, signal=38%	7266/11080/6767/10728/10808/3313/3303/3336/3304/3310/3312/3337	10:Monocyte	2			Whole PE	hsa05120	Epithelial cell signaling in Helicobacter pylori infection	61	0.395421	1.62632	0.00285391	0.0168381	0.0113656	960	tags=28%, list=7%, signal=26%	533/51606/5879/5603/2919/5970/2920/2921/90423/3576/6868/4233/6714/4790/10312/4067/9296	10:Monocyte	1			Whole PE	R-HSA-3371568	Attenuation phase	14	0.651994	1.95858	0.00376801	0.0260609	0.019907	1771	tags=64%, list=11%, signal=57%	3326/3306/3281/2288/3304/3297/3337/3312/3320	4:CTB-2	3
Whole PE	GO:0042274	ribosomal small subunit biogenesis	98	-0.477902	-1.91522	9.97498e-06	0.00160369	0.0013884	2559	tags=37%, list=19%, signal=30%	55226/4869/51118/6234/27292/6189/6201/6229/6202/6227/6210/6230/10528/6193/128061/3921/64745/6205/6208/5591/6207/153443/92856/25983/6228/6218/55127/6169/4809/11157/404672/2091/28987/23160/65095/51602	10:Monocyte	2			Whole PE	hsa00534	Glycosaminoglycan biosynthesis - heparan sulfate / heparin	17	0.601621	1.859	0.0033891	0.0188178	0.0127019	2449	tags=47%, list=18%, signal=39%	9653/9957/8509/9953/26229/2137/3340/2132	10:Monocyte	1			Whole PE	R-HSA-8868773	rRNA processing in the nucleus and cytosol	181	-0.495018	-2.15468	1e-10	8.895e-09	7.76316e-09	2559	tags=43%, list=19%, signal=35%	6135/6137/7311/55226/6138/6147/51388/23016/51118/57418/6234/6133/6143/27292/6189/6201/10200/6229/6222/6181/6202/10557/11224/6165/6132/6235/6227/6156/6210/55759/6130/6141/4736/6230/6157/6142/6168/10528/6193/6167/3921/6205/200916/25873/9045/6208/6154/6161/6152/6207/6155/6125/54555/23521/6146/92856/55651/6187/6224/6228/6159/9349/6218/6129/51504/23481/6136/55127/6169/4809/6164/2091/6160/28987/9188/23…	10:Monocyte	2
Whole PE	GO:0006403	RNA localization	178	-0.416007	-1.80344	1.07454e-05	0.00169052	0.00146358	2004	tags=26%, list=15%, signal=23%	8021/170506/91746/9984/10128/10856/545/6830/3181/23636/4116/64901/65125/4928/3192/9804/51092/10574/9631/8563/56943/23225/55651/4600/51637/8086/11052/29074/7528/9793/6741/2091/65110/908/80145/7884/9775/10576/7538/677/472/55110/7203/10575/6950/10643/51602	10:Monocyte	2			Whole PE	hsa05213	Endometrial cancer	55	0.429833	1.73156	0.00340051	0.0188178	0.0127019	2171	tags=33%, list=16%, signal=28%	5291/2309/5728/2885/6655/1495/3845/10000/207/3611/1499/5894/5605/6654/5594/1956/4609/578	10:Monocyte	1			Whole PE	R-HSA-6791226	Major pathway of rRNA processing in the nucleolus and cytosol	172	-0.496071	-2.14622	1e-10	8.895e-09	7.76316e-09	2504	tags=41%, list=18%, signal=34%	6138/6147/51388/23016/51118/57418/6234/6133/6143/6189/6201/10200/6229/6222/6181/6202/10557/11224/6165/6132/6235/6227/6156/6210/55759/6130/6141/4736/6230/6157/6142/6168/10528/6193/6167/3921/6205/200916/25873/9045/6208/6154/6161/6152/6207/6155/6125/54555/23521/6146/92856/6187/6224/6228/6159/9349/6218/6129/23481/6136/55127/6169/4809/6164/2091/6160/28987/9188/23160/6124/51602	10:Monocyte	2
Whole PE	GO:0002252	immune effector process	477	0.270018	1.51026	1.09532e-05	0.00169052	0.00146358	1731	tags=22%, list=13%, signal=20%	3956/64005/975/4282/2896/55619/613/3105/5795/196/24145/3107/3958/7009/5339/399687/5724/127544/6556/10758/8772/3955/6482/2794/8509/9948/5734/3133/3554/27342/10859/5272/3916/3569/55904/51043/7805/6813/7099/6461/114548/7293/7040/203068/3098/3106/11006/7042/89886/56253/2048/1675/4035/3575/3684/867/3606/6868/6714/7474/55601/1378/3716/1880/163486/51111/8832/961/5971/28984/10312/4067/3553/4221/6504/2821…	10:Monocyte	2			Whole PE	hsa00512	Mucin type O-glycan biosynthesis	22	0.557544	1.85753	0.0037621	0.0195851	0.0132198	2981	tags=50%, list=22%, signal=39%	2589/27090/6483/6482/63917/10610/9334/8693/56913/79695/55568	10:Monocyte	1			Whole PE	R-HSA-72312	rRNA processing	190	-0.47799	-2.09271	7.56241e-10	5.38141e-08	4.69665e-08	2559	tags=40%, list=19%, signal=33%	55226/6138/6147/51388/23016/51118/57418/6234/6133/6143/27292/6189/6201/10200/130916/6229/6222/6181/6202/10557/11224/6165/6132/6235/6227/6156/6210/55759/6130/6141/4736/6230/6157/6142/6168/10528/6193/6167/3921/6205/200916/25873/9045/6208/6154/6161/6152/6207/6155/6125/54555/23521/6146/92856/55651/6187/6224/6228/6159/9349/6218/6129/51504/23481/6136/55127/6169/4809/6164/2091/6160/28987/9188/23160/6124…	10:Monocyte	2
Whole PE	GO:0016050	vesicle organization	306	0.31201	1.67346	1.62514e-05	0.00232244	0.00201067	2599	tags=31%, list=19%, signal=26%	6281/9839/5872/26985/9146/5119/8877/2647/51762/399687/9871/23400/3267/533/51606/89781/23603/302/7251/8546/10981/2060/7110/7109/84376/26286/5990/348/83871/79666/5305/143187/6385/84062/91782/2054/10959/84272/9296/200576/10497/57617/54732/9765/6804/10254/55654/6504/128637/10484/3257/9554/9527/23023/5270/19/8615/51552/57403/122553/10483/9525/26258/55361/55823/10113/55111/5552/144717/23339/79643/6812/…	10:Monocyte	2			Whole PE	hsa04144	Endocytosis	229	0.261499	1.34807	0.00450675	0.0227913	0.0153839	2110	tags=24%, list=16%, signal=21%	10552/382/5337/3105/830/387/9146/58513/3107/5119/147179/60682/23327/80230/4193/10109/7251/3133/30844/55680/2060/26286/7048/3106/10938/867/50807/51100/6714/91782/118813/1234/64145/9765/10254/57154/3799/5878/5338/1213/57403/274/23550/9525/10565/79643/3480/998/29924/1956/23396/2869/868/10095/3559	10:Monocyte	1			Whole PE	R-HSA-9010553	Regulation of expression of SLITs and ROBOs	152	-0.491484	-2.08662	2.53655e-09	1.73559e-07	1.51474e-07	3793	tags=59%, list=28%, signal=43%	6171/6223/7979/5686/5682/6188/6206/6091/6209/10213/26986/5693/6092/2935/3670/6135/5694/6137/7311/6138/6147/6234/5706/6133/6143/6189/6201/6229/6222/6181/6202/5683/11224/5685/6165/6132/6235/6227/6156/8453/6210/6130/6141/4736/4116/6230/6157/6142/5698/6168/6193/6167/23198/5721/5684/3921/6205/200916/25873/9045/6208/6154/6161/6152/6207/7314/6155/6125/23521/6146/5691/5720/6187/5699/6224/6228/6159/9349/6…	10:Monocyte	2
Whole PE	GO:0022618	protein-RNA complex assembly	182	-0.40766	-1.76552	1.89784e-05	0.00256941	0.00222449	2623	tags=33%, list=19%, signal=27%	6634/79760/7536/9326/6147/10291/8664/6234/8667/91746/9879/55052/29997/10856/10419/545/22907/27335/51639/1939/51386/6193/8175/55299/3921/8663/6635/84231/8669/6208/5591/6152/6125/23521/22889/1653/84154/79084/10659/11052/57819/26121/6636/6169/8665/4809/10480/54496/9169/23195/11171/51747/6631/10728/472/3646/6637/1207/3320/3326	10:Monocyte	2			Whole PE	hsa05221	Acute myeloid leukemia	59	0.394433	1.6247	0.00482326	0.0240484	0.0162325	1622	tags=29%, list=12%, signal=25%	5291/2885/6655/1848/5970/3845/10000/207/3684/861/4790/5894/6777/5605/6654/929/5594	10:Monocyte	1			Whole PE	R-HSA-3371497	HSP90 chaperone cycle for steroid hormone receptors (SHR) in the presence of ligand	43	-0.637493	-2.19514	4.74222e-07	2.34345e-05	2.04526e-05	368	tags=28%, list=3%, signal=27%	2288/10728/8655/3303/55466/3320/3326/3304/3312/3337/3301/10963	10:Monocyte	2
Whole PE	GO:0071826	protein-RNA complex organization	190	-0.396596	-1.73264	3.68699e-05	0.00424664	0.00367656	2623	tags=33%, list=19%, signal=27%	6634/79760/7536/9326/6147/10291/8664/6234/8667/55192/91746/9879/8444/55052/29997/10856/10419/545/22907/27335/51639/1939/51386/6193/8175/55299/3921/8663/6635/84231/8669/6208/5591/6152/6125/23521/22889/1653/84154/79084/10659/11052/57819/26121/6636/6169/8665/4809/10480/54496/9169/23195/11171/51747/6631/10728/472/3646/6637/1207/3320/3326	10:Monocyte	2			Whole PE	hsa04973	Carbohydrate digestion and absorption	31	0.483683	1.72085	0.0067093	0.0316679	0.0213756	852	tags=23%, list=6%, signal=21%	5291/8972/10000/5331/3098/207/476	10:Monocyte	1			Whole PE	R-HSA-109582	Hemostasis	447	0.29273	1.60197	5.61606e-07	2.70026e-05	2.35667e-05	1876	tags=21%, list=14%, signal=19%	5291/23533/7873/967/308/6281/960/9732/2885/3688/3685/489/4282/25942/55619/5055/10184/6383/830/23303/387/4973/84617/54863/5583/5879/302/9948/5025/813/80228/23028/9123/7094/3845/6813/5768/7423/7040/10938/7056/207/7042/9371/51206/57406/1675/3684/140885/85440/6385/6714/2152/5528/8832/961/5271/5908/5894/4067/83706/2768/64145/2770/54331/26090/3799/10461/5328/3678/5270/226/135228/6850/5265/5529/2782/665…	10:Monocyte	2
Whole PE	GO:0010876	lipid localization	335	0.281413	1.513	7.69494e-05	0.00753707	0.00652528	2472	tags=27%, list=18%, signal=23%	55754/28231/3685/4282/55187/10226/23461/55852/6836/196527/23230/3783/5306/114885/6696/6713/302/5025/26207/3569/158219/7110/26020/56729/348/84879/79895/10938/207/51228/5305/4035/4790/84725/5826/10765/23760/51542/3553/5443/8204/10999/3552/11309/58488/706/10434/344/341/286046/2171/53349/1622/5825/6777/19/4481/5045/6850/9525/2867/4923/6256/28232/57655/55275/23344/81537/10577/134429/5071/5465/6580/116…	10:Monocyte	2			Whole PE	hsa04979	Cholesterol metabolism	37	0.441995	1.64241	0.00715579	0.032898	0.0222059	2053	tags=41%, list=15%, signal=35%	57552/51129/348/4035/7416/1593/706/344/341/19/10577/7417/1071/6272/3990	10:Monocyte	1			Whole PE	R-HSA-71291	Metabolism of amino acids and derivatives	282	-0.375373	-1.73074	2.33176e-06	0.000101176	8.83016e-05	2826	tags=38%, list=21%, signal=31%	4548/6821/6135/1158/5694/6137/64087/7311/2639/191/6138/118672/6147/4329/3176/6234/5706/57407/6133/6143/11112/262/6189/6201/549/2744/6229/6222/6181/6202/5683/15/11224/5685/6165/6132/6235/587/6227/144193/1734/6156/6210/51582/6130/6141/4736/6230/6157/6142/3242/5698/10955/2653/6168/5832/6193/6167/2752/3620/23198/6470/5721/5684/3921/1892/25828/3712/6205/200916/25873/9045/6208/6154/6161/29958/6152/6207…	10:Monocyte	2
Whole PE	GO:0051131	chaperone-mediated protein complex assembly	19	-0.70987	-2.03157	0.000105233	0.00956188	0.00827828	644	tags=42%, list=5%, signal=40%	3308/10471/10728/10576/3329/3303/3320/3326	10:Monocyte	2			Whole PE	hsa05215	Prostate cancer	92	0.336552	1.50051	0.00736579	0.0330062	0.0222789	1944	tags=27%, list=14%, signal=23%	5291/5728/56034/2885/2260/6655/1871/4193/5970/3845/10000/207/4790/7184/1499/5894/64764/5328/10488/5605/6654/5594/3480/1385/1956	10:Monocyte	1			Whole PE	R-HSA-376176	Signaling by ROBO receptors	189	-0.416251	-1.81987	4.36945e-06	0.000185078	0.000161527	2856	tags=44%, list=21%, signal=35%	3670/6135/5694/9423/6137/7311/6138/6147/5062/6234/5706/6133/6143/6189/6201/6229/6222/6181/6202/5683/11224/5685/9901/6165/6132/6235/6227/6156/8453/6210/6130/6141/4736/4116/6230/6157/6142/5698/56924/6168/6193/6167/23198/5721/5684/3921/6205/200916/25873/9045/6208/6154/6161/6152/6207/7314/6155/6125/23521/6146/5691/5720/6187/5699/6224/6228/5058/6159/9349/6218/6129/6136/6169/7316/6164/6160/65110/5705/5…	10:Monocyte	2
Whole PE	GO:2001243	negative regulation of intrinsic apoptotic signaling pathway	88	0.416355	1.8553	0.000125189	0.00975843	0.00844843	1937	tags=36%, list=14%, signal=31%	5291/960/4282/3622/57007/7009/5598/6648/55031/4193/2023/23028/2907/207/55829/6714/1499/599/50484/4976/25793/10488/8321/5770/3091/10525/754/9529/26155/5071/7417/8996	10:Monocyte	2			Whole PE	hsa05231	Choline metabolism in cancer	85	0.335642	1.48479	0.00982704	0.0429478	0.0289894	2206	tags=32%, list=16%, signal=27%	5291/56034/2885/5337/6655/5900/5879/8613/3845/10000/23446/207/5894/10434/5338/7248/5605/6654/160851/5594/3091/6580/1956/8611/23396/5599/5880	10:Monocyte	1			Whole PE	R-HSA-76002	Platelet activation, signaling and aggregation	207	0.337331	1.70394	9.72218e-06	0.000402227	0.000351046	2316	tags=29%, list=17%, signal=24%	5291/23533/7873/967/308/2885/10184/387/54863/5583/5879/9948/813/7094/6813/5768/7423/7040/207/7042/51206/57406/1675/6714/5908/5894/4067/83706/2768/2770/54331/26090/226/135228/6850/5265/2782/6654/5216/5770/160851/5594/5552/3082/6678/7534/5175/8407/998/221955/6464/808/1072/5580/2266/5880/51097/2335/2769/54676	10:Monocyte	2
Whole PE	GO:0050900	leukocyte migration	291	0.28807	1.51934	0.000174214	0.012334	0.0106783	1883	tags=23%, list=14%, signal=20%	64005/4763/3688/975/4282/613/79890/387/3958/5339/5724/196527/5879/8772/9948/5025/5734/3554/2683/27342/2919/3569/2358/2920/2921/7423/811/4814/207/7042/3576/56253/140885/6347/6868/6714/7474/1880/10059/6354/1234/961/4067/200576/3553/1269/3552/719/6504/101/2526/10894/10488/5142/6777/6850/2867/6654/5594/7070/4615/6484/5175/2841/998/1910	10:Monocyte	2			Whole PE	hsa04270	Vascular smooth muscle contraction	96	-0.575965	-2.12953	1.32168e-08	2.34598e-06	1.63471e-06	2118	tags=41%, list=16%, signal=34%	5566/779/4637/54776/10203/3778/2776/5567/805/2767/1909/5894/6093/4629/5320/5581/3708/8605/115/4638/800/94274/59/775/23365/5592/4659/2982/9475/72/3709/109/4660/185/111/2977/2983/23236/5322	13:Fibroblast	1			Whole PE	R-HSA-6806834	Signaling by MET	69	0.472421	1.99936	1.97885e-05	0.000782305	0.000682761	1676	tags=32%, list=12%, signal=28%	2885/3688/382/5795/2889/9146/5879/2060/3845/3915/867/85440/4233/6714/3914/5908/10254/23163/57610/6654/5770/3082	10:Monocyte	2
Whole PE	GO:0032990	cell part morphogenesis	439	0.254236	1.40264	0.000178739	0.0124409	0.0107708	1870	tags=21%, list=14%, signal=18%	960/5728/11252/3688/5797/25942/56978/55619/26115/6383/23303/10211/7204/23327/10678/5339/23136/1982/5879/8828/6696/23603/1959/150465/23654/4650/8609/10512/55201/348/84879/23390/11232/2048/85440/7533/6868/51177/10152/6714/1499/84062/7474/22911/118813/4891/8408/10059/28988/57142/5530/23394/51542/80025/6277/9373/57154/10501/3799/659/23022/57609/64855/6259/9693/55022/8826/113246/135/1605/57698/10006/1…	10:Monocyte	2			Whole PE	hsa04611	Platelet activation	96	-0.558188	-2.0638	8.24892e-08	9.76122e-06	6.80174e-06	2574	tags=43%, list=20%, signal=35%	5028/5594/5331/1277/10000/103910/1278/5566/2909/7094/2776/5584/5295/5908/60/10235/5567/6093/8673/207/10627/84876/208/1281/3708/8605/115/4638/2770/23365/5592/5290/4659/2982/9475/3709/109/111/2977/2983/23236	13:Fibroblast	1			Whole PE	R-HSA-1428517	The citric acid (TCA) cycle and respiratory electron transport	153	-0.414652	-1.76277	2.56895e-05	0.000972377	0.000848647	3129	tags=42%, list=23%, signal=33%	4708/4713/55744/5467/7351/516/4726/6391/3418/1327/137872/4200/514/4191/25880/506/4701/4710/116228/515/3029/55471/4725/10128/498/27089/7381/4704/9551/5164/8801/84987/1340/3419/1350/522/29796/4717/4731/4723/6834/10632/8802/4706/126328/4712/4707/4705/521/517/6390/51295/4695/27109/4722/80224/509/4711/4709/25915/4696/4716/539/51660	10:Monocyte	2
Whole PE	GO:0006935	chemotaxis	320	0.282136	1.5203	0.000239856	0.0141296	0.0122328	1283	tags=18%, list=9%, signal=17%	5291/9732/1890/3685/4282/5337/5872/2260/5795/2359/57007/79890/387/3958/5339/5724/196527/1902/5879/8828/5025/2919/3569/5898/10512/2358/55219/2920/2921/7423/7040/811/4814/7042/3576/6347/6868/4233/2152/7474/1880/10059/6354/1234/4067/200576/3553/1269/719/6504/101/10501/5328/659/1672/6259/10488	10:Monocyte	2			Whole PE	hsa04022	cGMP-PKG signaling pathway	125	-0.499823	-1.91977	1.90966e-06	0.000169482	0.000118097	1368	tags=30%, list=10%, signal=27%	150/805/2767/493/1909/5894/5532/6093/207/208/4208/5581/3708/2626/115/4776/4638/477/5534/8654/775/2770/5592/4659/2982/9475/3709/3764/109/5139/185/7225/111/6546/2977/2983/23236/1910	13:Fibroblast	1			Whole PE	R-HSA-9006934	Signaling by Receptor Tyrosine Kinases	430	0.272084	1.48173	4.26608e-05	0.00148811	0.00129875	2660	tags=30%, list=20%, signal=25%	5291/1509/56034/2885/3688/3685/382/25942/2069/2260/5795/2889/387/9146/58513/8877/1495/5598/5900/1848/533/51606/5978/5879/8828/6696/1959/83464/5603/9475/2060/5898/3845/639/253260/8440/10000/6461/3398/348/7423/90423/6196/207/3915/867/85440/6868/4233/10755/10152/6714/2152/1499/3914/5528/5908/10312/4067/9296/161742/5782/10254/79109/1535/5437/23163/6777/135/51107/1213/57610/5045/10006/9611/5605/6654/5…	10:Monocyte	2
Whole PE	GO:0042330	taxis	320	0.282136	1.5203	0.000239856	0.0141296	0.0122328	1283	tags=18%, list=9%, signal=17%	5291/9732/1890/3685/4282/5337/5872/2260/5795/2359/57007/79890/387/3958/5339/5724/196527/1902/5879/8828/5025/2919/3569/5898/10512/2358/55219/2920/2921/7423/7040/811/4814/7042/3576/6347/6868/4233/2152/7474/1880/10059/6354/1234/4067/200576/3553/1269/719/6504/101/10501/5328/659/1672/6259/10488	10:Monocyte	2			Whole PE	hsa04064	NF-kappa B signaling pathway	79	0.469806	1.91654	4.73809e-05	0.00183533	0.00127888	2085	tags=38%, list=16%, signal=32%	4616/1647/7187/6387/2920/3576/7185/5971/7128/330/4792/23643/4791/9020/4790/7706/10848/7412/3383/2919/148022/329/8915/353376/3554/1459/5743/7124/4067/55367	13:Fibroblast	1			Whole PE	R-HSA-1268020	Mitochondrial protein import	58	-0.503018	-1.83309	0.000225979	0.00639899	0.00558475	2630	tags=36%, list=19%, signal=29%	25813/506/26521/150274/131118/498/131474/400916/54543/10651/9804/10469/56993/26515/26519/100188893/79145/51287/3313/3329/54927	10:Monocyte	2
Whole PE	GO:0001885	endothelial cell development	49	0.487268	1.92205	0.000246903	0.0144345	0.0124968	2426	tags=43%, list=18%, signal=35%	2889/9414/9475/83605/4233/5908/3553/26051/9693/118/80781/7716/91663/4615/5175/1910/5962/7132/25932/9294/6093	10:Monocyte	2			Whole PE	hsa04972	Pancreatic secretion	53	-0.578457	-1.94443	6.76646e-05	0.00184777	0.00128755	1810	tags=30%, list=14%, signal=26%	3778/2776/7220/5908/8671/493/5320/6262/3708/115/477/3709/109/111/23236/5322	13:Fibroblast	1			Whole PE	R-HSA-8875878	MET promotes cell motility	35	0.545675	1.98832	0.000261286	0.00704285	0.00614668	939	tags=29%, list=7%, signal=27%	2885/3688/2889/5879/3915/85440/4233/6714/3914/5908	10:Monocyte	2
Whole PE	GO:0015980	energy derivation by oxidation of organic compounds	260	-0.347449	-1.57722	0.000250237	0.0145194	0.0125703	2908	tags=34%, list=21%, signal=27%	130752/4726/983/6391/3418/648791/8987/1327/11315/514/4436/4191/10580/5501/506/402/891/378884/27166/1355/7360/90624/4701/4710/515/7124/84300/4725/29997/498/65018/55811/135154/1716/27089/400916/7381/4704/246269/3643/92259/9551/3417/205327/5261/8801/1340/3953/3419/83943/1350/522/29796/3416/4717/4731/4723/6834/10632/5018/8802/4706/126328/144363/4712/4707/847/4705/521/8864/7157/6390/34/2475/4695/4722/…	10:Monocyte	2			Whole PE	hsa04971	Gastric acid secretion	47	-0.585497	-1.93366	8.15012e-05	0.00206664	0.00144006	2118	tags=43%, list=16%, signal=36%	482/5331/5566/3772/2776/60/5567/805/817/3708/115/4638/477/3274/2770/3709/109/7430/111/23236	13:Fibroblast	1			Whole PE	R-HSA-163210	Formation of ATP by chemiosmotic coupling	16	-0.703936	-1.89997	0.000299182	0.00782713	0.00683117	2913	tags=81%, list=21%, signal=64%	516/514/506/515/498/9551/522/10632/521/517/27109/509/539	10:Monocyte	2
Whole PE	GO:0002367	cytokine production involved in immune response	98	0.378218	1.70911	0.00026557	0.0146988	0.0127256	1816	tags=32%, list=13%, signal=28%	975/4282/3105/24145/3133/3554/27342/10859/3569/7805/7099/114548/7040/3098/11006/7042/89886/3606/7474/163486/3553/6504/684/4092/3663/144811/6850/2867/4615/11213/567	10:Monocyte	2			Whole PE	hsa04924	Renin secretion	52	-0.570743	-1.91038	9.24345e-05	0.00218762	0.00152436	2187	tags=46%, list=17%, signal=39%	155/5331/134/5566/779/3778/2776/5567/805/1909/5532/84876/3708/5534/775/2770/2982/3709/5139/185/111/2977/2983/23236	13:Fibroblast	1			Whole PE	R-HSA-1852241	Organelle biogenesis and maintenance	247	-0.346643	-1.57953	0.000389329	0.00975515	0.00851386	2460	tags=28%, list=18%, signal=23%	79969/23082/506/51098/6742/57545/95681/1387/8100/515/79659/9814/10376/64784/22897/79598/55902/80184/83657/498/90410/54820/7532/8766/51134/133522/55755/57539/9551/5577/10651/22919/522/4208/10142/125988/7978/5108/51626/10632/10499/146057/6604/11258/11064/440574/9657/521/4957/79718/517/9793/91147/27109/509/8655/10576/805/60412/3313/539/7203/55142/3320/54927/10575/211/6950/132320	10:Monocyte	2
Whole PE	GO:2001233	regulation of apoptotic signaling pathway	309	0.275193	1.47036	0.000266663	0.0146988	0.0127256	2326	tags=28%, list=17%, signal=24%	5291/117584/960/1514/5728/4763/3685/4282/2260/3622/259230/57007/3958/1495/7009/5598/6648/55031/4193/3064/8682/6672/1687/8772/2023/23028/5970/5034/8440/7099/9821/64114/2907/207/2537/55829/6714/1499/7474/599/10059/29949/5894/51330/50484/3553/3552/4976/2213/25793/10488/1459/1984/10116/135/7128/56658/8321/5770/114971/2730/3091/3082/10525/754/2729/9529/26155/5071/4000/7417/9774/8996/2923/4609/27429/56…	10:Monocyte	2			Whole PE	hsa05414	Dilated cardiomyopathy	75	-0.499693	-1.77864	0.000157013	0.00309664	0.00215778	1741	tags=31%, list=13%, signal=27%	1837/783/4634/60/5567/6442/6641/6262/7169/115/3675/7168/7042/775/8910/7139/109/3680/111/6546/3908/7043/3672	13:Fibroblast	1			Whole PE	R-HSA-9006335	Signaling by Erythropoietin	24	0.592724	1.98337	0.000661947	0.0145383	0.0126884	1906	tags=42%, list=14%, signal=36%	5291/23533/2885/2889/3845/4067/6777/2057/6654/6464	10:Monocyte	2
Whole PE	GO:0019221	cytokine-mediated signaling pathway	356	0.262596	1.41837	0.000263217	0.0146988	0.0127256	1799	tags=22%, list=13%, signal=20%	2309/117584/960/3601/25942/3093/2069/5795/51094/57007/3588/8877/9447/3454/10758/6672/8772/8195/3554/27342/10859/2919/5970/3569/5034/3455/7805/2920/2921/29110/7293/1796/3656/11006/207/3576/3611/3575/6347/867/3606/6868/6714/3987/2152/7474/8638/3716/8408/6354/1234/329/171392/5894/4067/3553/54472/10519/3552/3663/54838/1984/6777/2057/7128/11027/6850/26065/6654/4599/5770/163702/3091/4615/10401/11213/36…	10:Monocyte	2			Whole PE	hsa04141	Protein processing in endoplasmic reticulum	154	0.364019	1.62847	0.000181494	0.00339107	0.00236294	2435	tags=31%, list=19%, signal=26%	10808/3304/3337/4217/3303/23645/7323/6747/258010/3312/200185/4780/3320/91319/7321/267/6396/9451/10956/80343/1603/2081/29927/3326/1649/7466/824/10961/23480/10273/7415/578/4287/7353/118424/56605/9532/746/468/55968/6745/10952/3998/3301/64374/30001/64215/56893	13:Fibroblast	1			Whole PE	R-HSA-70263	Gluconeogenesis	24	0.584299	1.95517	0.000819236	0.0172165	0.0150258	1459	tags=38%, list=11%, signal=34%	5223/2597/2023/7167/2203/2026/2821/226/230	10:Monocyte	2
Whole PE	GO:0045333	cellular respiration	193	-0.3758	-1.64652	0.000273421	0.0148168	0.0128277	3498	tags=42%, list=26%, signal=32%	513/9167/79736/2631/10105/10891/55847/4708/4713/79751/130752/4726/983/6391/3418/1327/11315/514/4436/4191/506/402/891/27166/1355/90624/4701/4710/515/7124/84300/4725/29997/498/65018/135154/1716/27089/400916/7381/4704/246269/92259/9551/3417/205327/8801/1340/3419/83943/1350/522/29796/3416/4717/4731/4723/6834/10632/5018/8802/4706/126328/144363/4712/4707/847/4705/521/6390/4695/4722/1352/509/4711/863/84…	10:Monocyte	2			Whole PE	hsa04970	Salivary secretion	56	-0.538278	-1.81693	0.000314935	0.00478237	0.00333242	2571	tags=36%, list=20%, signal=29%	482/155/5331/5566/3778/2776/5567/805/493/3708/115/477/5592/2982/3709/109/111/2977/2983/23236	13:Fibroblast	1			Whole PE	R-HSA-5685942	HDR through Homologous Recombination (HRR)	66	-0.438418	-1.63357	0.00176782	0.0341843	0.0298345	5198	tags=58%, list=38%, signal=36%	3364/5982/6118/5932/51750/1111/7516/4361/116028/5890/6233/5883/9156/4683/7979/5810/84126/79728/348654/51426/5884/5888/10714/84464/7311/144715/545/10111/548593/7314/23514/7316/7156/5427/56655/5981/5889/472	10:Monocyte	2
Whole PE	GO:0046390	ribose phosphate biosynthetic process	184	-0.364904	-1.58758	0.000302756	0.015979	0.0138339	2913	tags=35%, list=21%, signal=28%	516/4726/471/6391/9605/8034/2181/514/109/2639/1723/79877/506/11001/4701/4710/7372/515/196883/55902/4725/50808/498/5471/65018/55811/31/2618/5198/4704/9551/64834/5164/4830/32/522/4717/4731/4723/10632/9524/4706/126328/60490/4712/4707/4705/113/1633/521/517/6390/4695/27109/4722/509/4711/4709/60481/4696/4716/353/539/7371	10:Monocyte	2			Whole PE	hsa04713	Circadian entrainment	66	-0.511759	-1.77976	0.000269631	0.00478237	0.00333242	1757	tags=29%, list=13%, signal=25%	2776/59345/2906/5567/805/817/2792/6262/3708/115/775/2770/5592/2982/109/111/2977/2983/23236	13:Fibroblast	1			Whole PE	R-HSA-72203	Processing of Capped Intron-Containing Pre-mRNA	264	-0.318272	-1.46115	0.00227063	0.043435	0.0379081	2880	tags=28%, list=21%, signal=23%	5356/5438/53981/10762/199746/9688/5435/6634/79902/7536/22826/10914/10291/9972/58517/9584/3178/4927/5411/9410/8021/9984/9879/10450/10915/57703/3181/23636/1665/4116/55094/51639/51759/10283/53938/9360/8175/4928/3192/6635/85437/9631/8189/3550/8563/9343/23225/84950/8086/11052/57819/26121/5439/6434/6636/1977/4809/23658/11157/143884/55100/79171/51747/6631/51362/79622/80145/7884/9775/10286/51690/55110/66…	10:Monocyte	2
Whole PE	GO:0030162	regulation of proteolysis	465	0.250315	1.38894	0.000371795	0.0186308	0.0161297	2032	tags=24%, list=15%, signal=21%	28996/1509/6281/117584/960/1514/5728/23291/489/2896/3093/10318/5055/11345/9447/11011/2597/127544/344558/1476/55031/64326/4193/23400/9683/5978/8772/2023/51429/302/83464/8975/9491/9475/5272/64215/7805/56616/7110/114548/348/6196/207/51035/1454/1611/4035/861/2537/54103/10755/7415/255488/6714/1992/2152/1378/5273/329/23787/5886/5271/5894/4067/2768/3553/79016/444/55081/9966/57154/1522/101/7337/5328/4092…	10:Monocyte	2			Whole PE	hsa04540	Gap junction	71	-0.501734	-1.77059	0.000292685	0.00478237	0.00333242	630	tags=21%, list=5%, signal=20%	3708/115/6655/2770/1902/5592/2982/6654/7082/3709/109/111/2977/2983/23236	13:Fibroblast	1			Whole PE	R-HSA-9012999	RHO GTPase cycle	379	-0.394766	-1.69536	3.97543e-07	4.40528e-05	3.9022e-05	2302	tags=28%, list=18%, signal=24%	9462/5825/84612/1629/6709/57498/3932/11135/7919/2873/4690/51133/23256/29843/10409/57630/23592/8874/613/2909/55023/57572/10652/857/394/8452/55971/9828/79598/5295/124540/79658/253959/87/57679/60/114793/55114/10298/3895/6434/9855/9411/64411/708/121512/9217/91010/11329/10395/23513/6093/84033/908/2802/23197/1445/10276/80243/7410/57579/57473/10818/54438/51306/8476/85440/9912/84144/23348/2040/6453/1213/…	13:Fibroblast	2
Whole PE	GO:0090083	regulation of inclusion body assembly	14	-0.720261	-1.91543	0.000427178	0.0201018	0.0174033	104	tags=50%, list=1%, signal=50%	5706/3300/10049/3303/55466/3304/3337	10:Monocyte	2			Whole PE	hsa04371	Apelin signaling pathway	105	-0.456824	-1.71671	0.000375983	0.00478237	0.00333242	2544	tags=39%, list=20%, signal=32%	5594/5331/9759/4087/30849/10000/3265/5566/2776/4634/59345/5567/7019/805/4089/6237/2475/5894/51422/2792/207/1490/208/5289/4208/5581/6262/7046/3708/115/4638/59/2770/3709/109/182/4854/185/111/6546/23236	13:Fibroblast	1			Whole PE	R-HSA-195721	Signaling by WNT	228	-0.428013	-1.75012	1.74255e-06	0.000181738	0.000160983	2606	tags=31%, list=20%, signal=25%	144165/5701/5515/5331/1173/7534/8324/83999/1387/5715/5695/7474/163/7482/6259/9070/192670/1454/192669/27327/7090/9580/5929/160/857/10197/8452/6885/5707/59345/5709/324/805/5704/3065/6597/5532/23513/9559/10524/2792/207/7514/6934/4343/208/80351/59349/55366/23112/51176/3708/8321/6422/1857/1213/5534/8313/84870/5592/57154/59352/4040/7475/79971/3709/55553/89780/7472/23236	13:Fibroblast	2
Whole PE	GO:0007093	mitotic cell cycle checkpoint signaling	125	-0.401713	-1.67932	0.000407915	0.0201018	0.0174033	3914	tags=45%, list=29%, signal=32%	83540/8883/5883/54908/4683/9656/595/11130/55159/835/147841/57082/348654/5884/7508/983/51451/1063/51499/80279/4436/9184/9587/891/29980/27183/25906/9577/144715/63967/29997/990/51514/10111/56984/55755/84101/8555/51322/5514/6154/5591/51149/3550/65123/58493/1112/79791/7157/3619/51347/1843/472/8738/54962/64859	10:Monocyte	2			Whole PE	hsa04390	Hippo signaling pathway	129	-0.436399	-1.68546	0.000359483	0.00478237	0.00333242	2917	tags=40%, list=22%, signal=31%	655/10207/1499/151449/3993/4086/5515/7534/8324/4087/896/25937/84612/7474/7482/7004/23286/1454/5584/324/60/4089/374/659/10413/23513/23291/653/1490/6934/657/6788/85407/3397/7046/51176/8321/1857/56288/7005/7042/894/8313/7475/84962/84552/89780/29119/7003/7472/7043	13:Fibroblast	1			Whole PE	R-HSA-6785807	Interleukin-4 and Interleukin-13 signaling	71	0.508009	2.00221	4.32542e-06	0.000365189	0.000323485	2894	tags=51%, list=22%, signal=40%	1026/9021/5292/3726/6935/7422/3576/3162/4313/595/6356/3312/7431/3976/3320/6772/604/3091/2308/7412/3383/8651/6347/2162/2353/3566/5743/7124/6095/7297/4170/598/6774/3570/4609/6624	13:Fibroblast	2
Whole PE	GO:0048193	Golgi vesicle transport	260	0.291674	1.50855	0.000428949	0.0201018	0.0174033	2173	tags=27%, list=16%, signal=23%	57222/5872/9648/11345/51762/399687/9871/23230/3064/55062/5870/11014/50999/8613/3916/55850/2060/90196/5034/7805/7109/26286/2580/51026/29959/83871/143187/23233/7415/10959/84272/51014/4905/23760/51542/64145/29097/54732/64764/11070/128637/91949/10484/10434/9554/9527/23163/8615/51552/10652/122553/10483/10945/10113/22818/60561/10525/9382/10749/9321/2801/57511/8548/56907/6272/3638/113419/27095/8452/403	10:Monocyte	2			Whole PE	hsa04820	Cytoskeleton in muscle cells	164	-0.405572	-1.61286	0.000377201	0.00478237	0.00333242	1494	tags=26%, list=11%, signal=23%	60/114793/22795/9172/1465/50509/91010/84033/6442/6641/58/2200/25802/1281/58529/4629/171024/23224/1284/7169/1301/1832/477/3675/1282/1290/7168/8910/85301/4811/2199/7139/7414/9260/6383/72/288/3680/10611/23500/3908/3672	13:Fibroblast	1			Whole PE	R-HSA-9013149	RAC1 GTPase cycle	152	-0.461623	-1.80322	9.12434e-06	0.000735339	0.000651364	1933	tags=30%, list=15%, signal=26%	23592/8874/613/2909/57572/10652/857/394/55971/5295/79658/57679/55114/10298/3895/9855/9411/64411/10395/80243/7410/51306/8476/85440/9912/84144/23348/10787/9743/10979/6655/10144/83478/26999/1793/23092/55843/5290/6654/143872/4162/26030/182/10160/1123	13:Fibroblast	2
Whole PE	GO:0090063	positive regulation of microtubule nucleation	7	-0.855178	-1.83363	0.000436823	0.0201854	0.0174757	765	tags=57%, list=6%, signal=54%	5058/9793/3303/3304	10:Monocyte	2			Whole PE	hsa05164	Influenza A	120	0.388524	1.66689	0.000404935	0.00479173	0.00333894	2481	tags=36%, list=19%, signal=29%	3337/4600/9021/7187/4599/4938/3576/10379/4792/3115/91543/6773/29107/8795/6772/5371/3665/4790/7706/4939/5610/29108/5605/3383/148022/3838/5291/3455/834/6347/54205/578/10241/3627/7416/5604/7124/3661/64135/1019/7297/2033/5970	13:Fibroblast	1			Whole PE	R-HSA-8875878	MET promotes cell motility	39	-0.652136	-2.09553	1.01889e-05	0.000785432	0.000695737	1513	tags=44%, list=12%, signal=39%	5908/64759/50509/5747/1281/85440/1301/3675/1290/2549/3082/3912/85301/3910/10319/3908/3915	13:Fibroblast	2
Whole PE	GO:0006278	RNA-templated DNA biosynthetic process	65	-0.475837	-1.80057	0.00044339	0.0201981	0.0174867	2624	tags=35%, list=19%, signal=29%	85456/55226/100134934/54386/3178/8550/545/10111/79991/3192/10574/55651/908/5981/10728/64282/10576/472/7203/3320/3326/10575/6950	10:Monocyte	2			Whole PE	hsa04730	Long-term depression	44	-0.54935	-1.77955	0.000788428	0.00777477	0.00541756	2544	tags=39%, list=20%, signal=31%	5594/5515/5331/3265/2776/3480/2767/5894/3708/8605/2770/5592/2982/3709/2977/2983/23236	13:Fibroblast	1			Whole PE	R-HSA-9013148	CDC42 GTPase cycle	128	-0.445148	-1.71534	0.000135532	0.00686565	0.00608161	1931	tags=30%, list=15%, signal=26%	8874/613/2909/57572/10652/857/394/5295/79658/114793/55114/10298/3895/9411/64411/121512/91010/10395/23513/80243/7410/51306/8476/85440/9912/23348/2040/6453/9743/83478/23365/10602/84364/23092/143872/26030/10160/1123	13:Fibroblast	2
Whole PE	GO:0032206	positive regulation of telomere maintenance	65	-0.475322	-1.79862	0.00045615	0.0201981	0.0174867	3809	tags=48%, list=28%, signal=34%	4683/5588/79618/10694/54617/22948/7520/26272/84464/54386/3178/8550/93973/170506/51377/10856/545/3181/10111/79913/5514/548593/10574/283899/7528/908/10576/472/7203/10575/6950	10:Monocyte	2			Whole PE	hsa04530	Tight junction	121	-0.419311	-1.61125	0.00110523	0.0106043	0.00738919	2534	tags=36%, list=19%, signal=30%	5515/51762/10398/1366/84612/5111/103910/5566/11149/5962/4637/154810/5584/87/60/55114/5567/51422/9223/23513/6093/4734/10627/5599/4629/11346/2064/5581/8777/2626/4214/56288/10092/3059/81/5602/9693/7082/9475/84552/51421/84952/51735/7430	13:Fibroblast	1			Whole PE	R-HSA-6806834	Signaling by MET	72	-0.509681	-1.8017	0.000140948	0.00694167	0.00614894	1681	tags=38%, list=13%, signal=33%	1277/23163/3265/1278/3911/5295/5908/64759/50509/5747/1281/6692/85440/1301/3675/1290/2549/3082/3912/85301/10653/5290/6654/3910/10319/3908/3915	13:Fibroblast	2
Whole PE	GO:0006413	translational initiation	107	-0.422139	-1.7017	0.000488509	0.0210605	0.0182333	2422	tags=37%, list=18%, signal=31%	4869/8664/23367/27102/8667/8637/6189/57409/7124/55024/28969/64410/1967/6059/27335/1939/51386/6193/23645/8663/253943/8669/1965/23521/1653/219402/6218/3315/10605/1977/9451/8665/10480/8892/2475/440275/1978/7884/3646/83939	10:Monocyte	2			Whole PE	hsa04216	Ferroptosis	32	0.559963	1.92207	0.00119941	0.010676	0.00743918	1578	tags=34%, list=12%, signal=30%	23516/2180/2512/2879/2495/3162/5094/81631/5093/112483/2729	13:Fibroblast	1			Whole PE	R-HSA-9006934	Signaling by Receptor Tyrosine Kinases	426	-0.337084	-1.46294	0.000148345	0.00710853	0.00629674	2544	tags=30%, list=20%, signal=25%	5594/5515/7057/1277/1173/5921/5802/23543/23163/5154/30849/10000/6777/5792/9252/3265/5170/57498/3932/10193/9550/4690/58513/1278/3416/5566/5796/163/6678/8874/8483/3911/3925/160/5725/3480/857/23768/5434/5295/1500/2261/6236/5908/60/1785/4670/5567/3178/51231/10076/64759/805/3187/374/10755/2475/50509/9611/9564/10413/3065/83737/6093/5978/4734/79109/5747/627/5440/207/1445/7410/4916/208/5782/10818/1281/52…	13:Fibroblast	2
Whole PE	GO:0031589	cell-substrate adhesion	266	0.280756	1.46132	0.000528171	0.0219134	0.0189717	1216	tags=15%, list=9%, signal=14%	5291/967/6281/960/5728/64005/4763/3688/3685/613/5795/387/9404/79834/5879/23603/10109/9475/7094/6237/5034/811/54453/3915/3611/4289/3684/6385/6714/3987/1499/342184/83706/3696/10519/10461/5328/3678/10894/79778	10:Monocyte	2			Whole PE	hsa05219	Bladder cancer	35	0.526463	1.82092	0.001233	0.010676	0.00743918	1236	tags=34%, list=9%, signal=31%	1026/1890/7422/3576/4313/595/1029/1956/1871/23604/5605/3845	13:Fibroblast	1			Whole PE	R-HSA-3214847	HATs acetylate histones	71	-0.500527	-1.77081	0.000198545	0.00880051	0.0077955	4051	tags=62%, list=31%, signal=43%	11091/26610/7862/23338/54859/339287/57634/79595/10499/57325/84289/27154/6944/8295/8607/6881/55250/284058/1387/51562/55257/23522/23774/86/64769/8520/93624/55140/8648/55929/6871/60/55167/55683/27097/6314/11143/10902/10524/84148/8464/51147/55578/80314	13:Fibroblast	2
Whole PE	GO:0007004	telomere maintenance via telomerase	64	-0.482129	-1.81177	0.000565284	0.0228393	0.0197733	2624	tags=38%, list=19%, signal=30%	9894/85456/55226/100134934/54386/3178/8550/545/10111/79991/3192/10574/55651/908/5981/10728/64282/10576/472/7203/3320/3326/10575/6950	10:Monocyte	2			Whole PE	hsa05168	Herpes simplex virus 1 infection	141	0.352675	1.54795	0.00121971	0.010676	0.00743918	1794	tags=26%, list=14%, signal=23%	9021/7187/4938/3678/6890/10379/3133/3106/330/4792/3107/3115/5452/6773/567/6772/5371/5501/3665/4790/9451/3105/115004/4939/5610/6426/8764/148022/5291/3455/329/6347/54205/578/6672/684/718	13:Fibroblast	1			Whole PE	R-HSA-75205	Dissolution of Fibrin Clot	9	0.823717	1.89834	0.00029077	0.0119892	0.0106201	948	tags=56%, list=7%, signal=52%	5329/6281/5270/5327/5054	13:Fibroblast	2
Whole PE	GO:0042255	ribosome assembly	54	-0.489986	-1.78093	0.000586956	0.0234501	0.0203021	3382	tags=56%, list=25%, signal=42%	7520/6209/57647/29960/27341/6135/6147/51388/4869/51119/6234/130916/55052/29997/22907/6193/708/55299/3921/51335/84231/6208/5591/6152/6125/51116/84154/6169/23195/83939	10:Monocyte	2			Whole PE	hsa05417	Lipid and atherosclerosis	163	0.332744	1.49614	0.00158441	0.0130806	0.00911473	2147	tags=29%, list=16%, signal=25%	3304/4772/4217/3303/7187/6648/2920/3576/5606/4792/23643/3312/4780/5452/3329/3320/8795/4773/801/6348/3665/3725/4790/9451/29108/2081/3326/1649/7412/839/3383/3845/2919/5530/148022/5291/834/6347/54205/808/353376/468/2353/7124/4067/1535/3308/3661	13:Fibroblast	1			Whole PE	R-HSA-9619665	EGR2 and SOX10-mediated initiation of Schwann cell myelination	24	-0.656824	-1.88832	0.000417763	0.0154311	0.0136689	1756	tags=50%, list=13%, signal=43%	3156/79966/5376/10413/6597/84059/4664/57211/3912/7003/3908/3915	13:Fibroblast	2
Whole PE	GO:0002716	negative regulation of natural killer cell mediated immunity	19	0.629379	1.94968	0.000645722	0.0247912	0.0214632	620	tags=32%, list=5%, signal=30%	3105/3133/10859/5272/7040/3106	10:Monocyte	2			Whole PE	hsa05410	Hypertrophic cardiomyopathy	70	-0.469647	-1.65097	0.00186684	0.0141006	0.00982547	1741	tags=29%, list=13%, signal=25%	1837/783/4634/60/51422/6442/6641/6262/7169/3675/7168/7042/775/8910/7139/3680/6546/3908/7043/3672	13:Fibroblast	1			Whole PE	R-HSA-201681	TCF dependent signaling in response to WNT	147	-0.415068	-1.61359	0.000502586	0.0181854	0.0161087	3971	tags=42%, list=30%, signal=30%	283149/5528/81847/57680/5710/1855/23198/5686/607/51339/22943/8085/8295/83439/1457/8607/9101/5706/1499/7091/84133/5701/5515/7534/83999/1387/5715/5695/7474/6259/9070/1454/7090/9580/5929/857/10197/8452/5707/5709/324/5704/3065/6597/10524/207/7514/6934/208/80351/59349/55366/51176/8321/6422/1857/8313/84870/59352/4040/55553/89780	13:Fibroblast	2
Whole PE	GO:0009165	nucleotide biosynthetic process	230	-0.340257	-1.51668	0.000771403	0.0282129	0.0244255	2913	tags=33%, list=21%, signal=27%	516/4726/471/1841/6391/9605/54956/8034/2181/514/109/2639/1723/79877/506/11001/4701/4710/7372/7084/515/196883/55902/4725/50808/498/5471/65018/349565/55811/31/55191/2618/5198/1716/65220/4704/3620/9551/64834/5164/4830/6470/32/1854/522/4717/4731/4723/10632/9524/4706/126328/60490/129607/4712/4707/4705/113/1633/521/517/6390/4695/27109/4722/509/6241/4711/4709/60481/4696/4716/353/539/7371/125061	10:Monocyte	2			Whole PE	hsa04724	Glutamatergic synapse	76	-0.454044	-1.61377	0.00186649	0.0141006	0.00982547	1757	tags=28%, list=13%, signal=24%	2776/59345/7220/2906/81539/5567/5532/2792/6507/54407/3708/8605/115/5534/775/2770/156/3709/109/111/23236	13:Fibroblast	1			Whole PE	R-HSA-9678108	SARS-CoV-1 Infection	126	0.365079	1.59772	0.000518051	0.0183701	0.0162723	3300	tags=44%, list=25%, signal=33%	51065/7187/83666/861/4792/6484/6231/5094/1514/6223/4790/7706/85437/29108/6203/4245/7532/81631/6482/3838/10971/2280/834/6209/84875/7415/684/6210/6206/7311/3661/128866/2197/64135/51652/6227/7533/6232/2033/5970/3656/598/6483/6487/6194/6234/6205/7428/6235/29082/6222/2932/6204/6207/6229	13:Fibroblast	2
Whole PE	GO:0000075	cell cycle checkpoint signaling	170	-0.372329	-1.60472	0.000829766	0.029365	0.025423	3914	tags=42%, list=29%, signal=31%	83540/8883/84072/5883/54908/4683/9656/595/81620/11130/151636/5810/55159/7919/84126/26272/835/147841/57082/348654/5884/5888/7508/983/51451/9894/1063/51499/80279/4436/9184/9587/891/29980/27183/25906/9577/144715/63967/9984/29997/990/51514/545/79621/10111/56984/55755/80185/84101/8555/51322/5514/6154/5591/51149/3550/8563/65123/58493/1112/79791/7157/3619/25896/440275/51347/1843/472/8738/54962/64859	10:Monocyte	2			Whole PE	hsa04081	Hormone signaling	113	-0.418635	-1.59048	0.00191429	0.0141578	0.00986532	1757	tags=24%, list=13%, signal=21%	2776/3480/5295/30061/59345/5567/150/2100/2767/4089/2792/657/2690/4093/3481/115/2770/3717/5592/5290/4090/109/5745/185/111/5618/23236	13:Fibroblast	1			Whole PE	R-HSA-198933	Immunoregulatory interactions between a Lymphoid and a non-Lymphoid cell	49	0.494102	1.82006	0.000808452	0.0242947	0.0215203	1221	tags=24%, list=9%, signal=22%	9976/8519/3133/3106/3107/567/3824/3105/5817/3385/7412/3383	13:Fibroblast	2
Whole PE	GO:0009260	ribonucleotide biosynthetic process	181	-0.367083	-1.5887	0.000828717	0.029365	0.025423	2913	tags=35%, list=21%, signal=28%	516/4726/471/6391/9605/8034/2181/514/109/2639/1723/79877/506/11001/4701/4710/7372/515/196883/55902/4725/50808/498/5471/65018/55811/31/2618/5198/4704/9551/64834/5164/4830/32/522/4717/4731/4723/10632/9524/4706/126328/60490/4712/4707/4705/113/1633/521/517/6390/4695/27109/4722/509/4711/4709/60481/4696/4716/353/539/7371	10:Monocyte	2			Whole PE	hsa04927	Cortisol synthesis and secretion	47	-0.521356	-1.72182	0.00199463	0.0143912	0.0100279	2217	tags=40%, list=17%, signal=34%	1388/5566/779/2776/5567/2767/6667/5087/84876/3708/115/775/3777/3709/109/185/111/8622/23236	13:Fibroblast	1			Whole PE	R-HSA-3371511	HSF1 activation	11	0.751756	1.8106	0.00190462	0.0482414	0.0427323	2293	tags=55%, list=18%, signal=45%	3320/3281/3326/3297/7415/6119	13:Fibroblast	2
Whole PE	GO:0032535	regulation of cellular component size	268	0.278889	1.46099	0.000953765	0.032712	0.0283207	1721	tags=22%, list=13%, signal=20%	54434/5728/93663/2885/382/25942/830/79890/387/29766/2647/1982/196527/3783/23400/5879/6696/51429/10109/9948/150465/8195/5916/23028/10512/253260/8440/10000/9821/348/729991/3575/7474/118813/8408/57142/23394/342184/9990/57154/10501/394/5756/659/57609/6259/118/7248/57403/57698/274/1946/10507/5216/11344/120/10565/23580/91663/11194	10:Monocyte	2			Whole PE	hsa04921	Oxytocin signaling pathway	112	-0.419447	-1.59191	0.00202693	0.0143912	0.0100279	2544	tags=37%, list=20%, signal=30%	5594/781/5331/10398/3265/5566/779/4637/54776/10645/2776/783/60/5567/805/5894/51422/5532/6093/817/4208/29904/6262/3708/8605/115/4776/4638/5534/775/2770/4659/2982/9475/3709/109/4660/111/2977/2983/23236	13:Fibroblast	1			Whole PE	R-HSA-9010553	Regulation of expression of SLITs and ROBOs	157	0.719715	3.03997	1e-10	2.82879e-09	2.30622e-09	2567	tags=71%, list=16%, signal=60%	6224/23521/6124/5692/9349/6218/5709/6128/5685/6160/5710/6181/200916/10213/6194/6205/11224/5713/7314/9939/6129/6143/5717/9045/6209/6158/6217/6132/5700/5695/6125/6161/6135/5682/9775/5684/6152/6146/6123/5690/6159/5687/2935/6202/6203/6137/6147/4116/25873/6175/9861/5688/5701/5691/6167/10197/5704/6176/5686/6154/6157/6208/6139/6165/6921/5683/5721/6155/26986/6141/6230/6193/6207/6206/5714/5689/7311/7979/7…	1:CTB	2
Whole PE	GO:0010975	regulation of neuron projection development	315	0.270976	1.45833	0.000952549	0.032712	0.0283207	1816	tags=22%, list=13%, signal=20%	55754/7431/5728/3601/382/2896/1809/26115/2889/6383/23303/387/23327/257194/1982/4193/1902/6696/23028/23654/8036/10512/348/84879/2580/10938/207/2048/55704/7533/23271/10152/129807/84062/7474/118813/8408/57142/5530/23394/83999/4067/10519/27020/57154/10501/5756/659/22943/23413/57609/25793/6259/9693/54606/81545/57698/1946/5605/10507/8321/11344/5376/1855/162427/7070/64689/9529/3480/567	10:Monocyte	2			Whole PE	hsa05133	Pertussis	55	0.459797	1.73922	0.00207441	0.0144396	0.0100617	2614	tags=45%, list=20%, signal=36%	715/716/3659/3678/3576/23643/801/3725/4790/29108/148022/834/808/718/717/353376/2353/710/7124/3661/5970/3394/727/2771/7099	13:Fibroblast	1			Whole PE	R-HSA-6791226	Major pathway of rRNA processing in the nucleolus and cytosol	173	0.668727	2.84606	1e-10	2.82879e-09	2.30622e-09	3871	tags=73%, list=24%, signal=56%	6224/23521/6124/4809/9349/6218/6128/10436/55272/6160/23246/6181/200916/6194/6205/11224/6129/6143/9045/6209/6158/6217/6132/114049/56915/6125/6161/6135/27341/6152/6146/6123/56902/6159/1454/6202/6203/6137/6147/25873/6175/9188/6167/6176/51602/9136/6154/6157/28987/6208/6139/6165/6155/2091/23404/6141/6230/6193/6207/6206/7311/6229/23016/6133/6138/6189/6142/10969/51013/6169/10557/6222/6171/92856/26354/11…	1:CTB	2
Whole PE	GO:0097529	myeloid leukocyte migration	174	0.314112	1.55616	0.00096267	0.0327265	0.0283332	1374	tags=22%, list=10%, signal=20%	4763/975/4282/613/79890/3958/196527/5879/9948/5025/5734/3554/2683/27342/2919/3569/2358/2920/2921/7423/7042/3576/140885/6347/10059/6354/961/4067/200576/3553/3552/719/6504/101/2526/10488/5142/6777	10:Monocyte	2			Whole PE	hsa04961	Endocrine and other factor-regulated calcium reabsorption	39	-0.562009	-1.80338	0.00238081	0.0159469	0.011112	2571	tags=41%, list=20%, signal=33%	482/5331/1173/5566/163/160/2776/1785/5567/493/115/1213/477/5745/6546/23236	13:Fibroblast	1			Whole PE	R-HSA-8868773	rRNA processing in the nucleus and cytosol	182	0.664495	2.84069	1e-10	2.82879e-09	2.30622e-09	3871	tags=72%, list=24%, signal=56%	6224/23521/6124/4809/55651/9349/55505/51504/6218/6128/10436/55272/6160/23246/6181/200916/6194/6205/11224/6129/6143/9045/6209/6158/6217/6132/114049/56915/6125/6161/6135/27341/6152/6146/6123/56902/6159/1454/6202/6203/6137/6147/25873/6175/9188/6167/6176/51602/9136/6154/6157/28987/6208/6139/6165/6155/2091/23404/6141/6230/6193/6207/6206/7311/6229/23016/6133/6138/6189/6142/10969/51013/6169/10557/6222/6…	1:CTB	2
Whole PE	GO:0034329	cell junction assembly	273	0.278975	1.46665	0.000961787	0.0327265	0.0283332	1853	tags=20%, list=14%, signal=18%	6281/5728/382/5872/613/5795/2889/10211/387/5583/1495/5339/257194/23136/79834/5879/23603/9948/9475/23654/7094/7097/3915/2048/6385/6714/3987/1499/7474/28988/23394/342184/5908/3553/22883/27020/3678/22943/4092/79778/1364/6801/6259/9693/51201/7248/1946/10507/8321/1855/7070/5786/5175/998/2706	10:Monocyte	2			Whole PE	hsa04261	Adrenergic signaling in cardiomyocytes	109	-0.427873	-1.6131	0.00250931	0.0161964	0.0112859	2571	tags=31%, list=20%, signal=25%	482/5594/781/5515/5331/10000/9252/1388/5566/11149/779/2776/783/4634/5567/805/493/817/207/208/6262/7169/115/477/6332/7168/775/2770/7139/109/185/111/6546/23236	13:Fibroblast	1			Whole PE	R-HSA-72312	rRNA processing	191	0.654865	2.8145	1e-10	2.82879e-09	2.30622e-09	3871	tags=70%, list=24%, signal=54%	6224/23521/6124/4809/55651/9349/55505/51504/6218/6128/10436/55272/6160/23246/6181/200916/6194/6205/11224/6129/6143/9045/6209/6158/6217/6132/114049/56915/6125/6161/6135/27341/387338/6152/6146/6123/56902/6159/1454/6202/6203/6137/6147/25873/6175/9188/6167/6176/51602/9136/6154/6157/28987/6208/6139/6165/6155/2091/23404/6141/6230/6193/6207/6206/7311/6229/23016/6133/6138/6189/6142/10969/51013/6169/10557…	1:CTB	2
Whole PE	GO:0048858	cell projection morphogenesis	421	0.249879	1.37782	0.000968617	0.0327843	0.0283833	1936	tags=21%, list=14%, signal=18%	960/5728/11252/3688/5797/25942/56978/55619/26115/6383/23303/10211/7204/23327/10678/23136/1982/5879/8828/6696/23603/1959/150465/23654/4650/8609/10512/55201/348/84879/23390/2048/85440/7533/6868/51177/10152/6714/1499/84062/7474/22911/118813/4891/8408/28988/57142/5530/23394/51542/6277/9373/57154/10501/3799/659/23022/57609/64855/6259/9693/8826/113246/135/1605/57698/10006/1946/214/4854/5605/6654/10507/…	10:Monocyte	2			Whole PE	hsa04934	Cushing syndrome	119	-0.4173	-1.59838	0.00247721	0.0161964	0.0112859	2544	tags=34%, list=20%, signal=28%	5594/4297/5331/8324/1388/7474/5566/779/7482/9070/5929/2776/324/5908/5567/2767/196/6667/817/5087/6934/84876/51176/3708/8321/1857/115/775/2770/8313/3777/7475/3709/109/89780/1021/185/111/8622/7472/23236	13:Fibroblast	1			Whole PE	R-HSA-376176	Signaling by ROBO receptors	199	0.649586	2.80554	1e-10	2.82879e-09	2.30622e-09	2567	tags=60%, list=16%, signal=51%	6224/23521/6124/5879/5692/9349/6218/5709/6128/5685/6160/5710/6181/200916/10213/6194/6205/11224/387/5713/7314/9939/6129/6143/5717/9045/6209/6158/6217/6132/10487/5216/5700/5695/6125/6161/6135/5682/9775/5684/998/6152/6146/6123/5690/6159/5687/2935/6202/6203/6137/6147/4116/25873/6175/9861/5688/5701/5691/6167/10298/10197/5704/6176/5686/6154/6157/6208/6139/6165/6921/5683/5721/6155/26986/6141/6230/6193/6…	1:CTB	2
Whole PE	GO:0002718	regulation of cytokine production involved in immune response	96	0.370153	1.66411	0.00108485	0.0353241	0.0305821	1816	tags=31%, list=13%, signal=27%	975/4282/3105/24145/3133/3554/27342/10859/3569/7805/7099/114548/7040/3098/11006/7042/3606/7474/163486/3553/6504/684/4092/3663/144811/6850/2867/4615/11213/567	10:Monocyte	2			Whole PE	hsa04750	Inflammatory mediator regulation of TRP channels	71	-0.456388	-1.61056	0.00280168	0.017449	0.0121587	1757	tags=24%, list=13%, signal=21%	2776/5295/5567/805/817/5599/5581/3708/8605/115/5602/4803/5290/3709/109/111/23236	13:Fibroblast	1			Whole PE	R-HSA-450408	AUF1 (hnRNP D0) binds and destabilizes mRNA	54	0.736721	2.63009	1e-10	2.82879e-09	2.30622e-09	2419	tags=72%, list=15%, signal=62%	5692/3315/5709/5685/5710/10213/5713/7314/5717/3304/5700/5695/5682/5684/5690/5687/9861/5688/5701/5691/10197/5704/5686/5683/5721/26986/5714/5689/7311/7979/7316/5693/5719/5702/6233/5705/5694/3312/5720	1:CTB	2
Whole PE	GO:1901293	nucleoside phosphate biosynthetic process	231	-0.338385	-1.51122	0.00118775	0.0371087	0.0321272	2913	tags=33%, list=21%, signal=27%	516/4726/471/1841/6391/9605/54956/8034/2181/514/109/2639/1723/79877/506/11001/4701/4710/7372/7084/515/196883/55902/4725/50808/498/5471/65018/349565/55811/31/55191/2618/5198/1716/65220/4704/3620/9551/64834/5164/4830/6470/32/1854/522/4717/4731/4723/10632/9524/4706/126328/60490/129607/4712/4707/4705/113/1633/521/517/6390/4695/27109/4722/509/6241/4711/4709/60481/4696/4716/353/539/7371/125061	10:Monocyte	2			Whole PE	hsa05162	Measles	99	0.368236	1.53883	0.00307243	0.0184867	0.0128817	2692	tags=39%, list=21%, signal=31%	3304/3303/4600/7187/4599/4938/10379/7128/4792/595/3312/27113/6773/6772/3665/3725/4790/9451/4939/5610/5291/3455/868/6776/54205/578/1459/2353/3661/64135/1019/7297/5970/10399/7099/598/103/6774/572	13:Fibroblast	1			Whole PE	R-HSA-8852276	The role of GTSE1 in G2/M progression after G2 checkpoint	68	0.702262	2.61181	1e-10	2.82879e-09	2.30622e-09	2856	tags=68%, list=18%, signal=56%	7277/5692/7280/5709/5685/10381/5710/10213/3326/5713/7314/5717/5700/5695/5682/5684/5690/5687/9861/5688/5701/5691/10197/5704/84790/3320/5686/5683/5721/7846/5714/5689/7311/7979/10383/7316/5693/5719/5702/6233/5705/5694/5720/51512/983/5706	1:CTB	2
Whole PE	GO:0006397	mRNA processing	416	-0.299665	-1.4105	0.00139596	0.0417543	0.0361491	2245	tags=23%, list=17%, signal=20%	58517/9584/3178/285367/6294/5411/9410/55192/23091/142940/170506/91746/9984/9879/92906/10450/10419/10915/57703/6830/79005/3181/1665/4116/55094/51639/80324/51759/10283/29896/53938/51574/1859/285672/8175/708/11319/4928/3192/167153/6635/85437/8189/54623/3550/51163/8563/9904/79042/9343/2483/22889/84950/1653/6421/79084/10659/11052/57819/7072/64062/202559/26121/55544/6434/6636/11129/4809/23658/11157/966…	10:Monocyte	2			Whole PE	hsa04916	Melanogenesis	79	-0.448202	-1.6083	0.00327399	0.0193711	0.013498	2544	tags=33%, list=20%, signal=27%	5594/5331/8324/1387/3265/7474/5566/7482/2776/5567/805/5894/817/6934/51176/8321/1857/115/2770/7475/109/89780/111/7472/23236/1910	13:Fibroblast	1			Whole PE	R-HSA-211733	Regulation of activated PAK-2p34 by proteasome mediated degradation	48	0.748892	2.59864	1e-10	2.82879e-09	2.30622e-09	2419	tags=73%, list=15%, signal=62%	5692/5709/5685/5710/10213/5713/7314/5717/5700/5695/5682/5684/5690/5687/9861/5688/5701/5691/10197/5704/5686/5683/5721/5714/5689/7311/7979/7316/5693/5719/5702/6233/5705/5694/5720	1:CTB	2
Whole PE	GO:0048592	eye morphogenesis	99	0.352656	1.59634	0.00143823	0.042439	0.0367419	2527	tags=29%, list=19%, signal=24%	28996/6670/4763/5797/3150/5916/639/84879/2048/10152/65979/1499/7474/10370/128637/113246/6015/7482/3091/7070/23287/1296/23424/7428/578/2047/10220/468/7855	10:Monocyte	2			Whole PE	hsa05224	Breast cancer	112	-0.40937	-1.55367	0.00372821	0.0210663	0.0146793	1755	tags=29%, list=13%, signal=25%	3480/5295/8648/324/5728/2100/23493/2475/5894/6667/207/6934/4853/208/2064/25759/51176/8321/1857/6655/8313/4040/5290/10912/6654/7475/26508/182/89780/1021/4854/7472	13:Fibroblast	1			Whole PE	R-HSA-69601	Ubiquitin Mediated Degradation of Phosphorylated Cdc25A	50	0.734935	2.56622	1e-10	2.82879e-09	2.30622e-09	2419	tags=70%, list=15%, signal=60%	5692/5709/5685/5710/10213/5713/7314/5717/5700/5695/5682/5684/5690/5687/9861/5688/5701/5691/10197/5704/5686/5683/5721/5714/5689/7311/7979/7316/5693/5719/5702/6233/5705/5694/5720	1:CTB	2
Whole PE	GO:0120039	plasma membrane bounded cell projection morphogenesis	419	0.244905	1.35485	0.00143604	0.042439	0.0367419	1936	tags=21%, list=14%, signal=18%	960/5728/3688/5797/25942/56978/55619/26115/6383/23303/10211/7204/23327/10678/23136/1982/5879/8828/6696/23603/1959/150465/23654/4650/8609/10512/55201/348/84879/23390/2048/85440/7533/6868/51177/10152/6714/1499/84062/7474/22911/118813/4891/8408/28988/57142/5530/23394/51542/6277/9373/57154/10501/3799/659/23022/57609/64855/6259/9693/8826/113246/135/1605/57698/10006/1946/214/4854/5605/6654/10507/11344/…	10:Monocyte	2			Whole PE	hsa04625	C-type lectin receptor signaling pathway	82	0.375578	1.52914	0.0037691	0.0210663	0.0146793	1528	tags=32%, list=12%, signal=28%	4772/22808/3659/1960/10379/5971/602/4792/6773/9261/4791/6772/4773/801/3725/9020/4790/29108/1959/3845/5530/8844/5291/834/868/8915	13:Fibroblast	1			Whole PE	R-HSA-69610	p53-Independent DNA Damage Response	50	0.734935	2.56622	1e-10	2.82879e-09	2.30622e-09	2419	tags=70%, list=15%, signal=60%	5692/5709/5685/5710/10213/5713/7314/5717/5700/5695/5682/5684/5690/5687/9861/5688/5701/5691/10197/5704/5686/5683/5721/5714/5689/7311/7979/7316/5693/5719/5702/6233/5705/5694/5720	1:CTB	2
Whole PE	GO:0009152	purine ribonucleotide biosynthetic process	168	-0.359612	-1.55085	0.00145229	0.0426134	0.0368929	2913	tags=36%, list=21%, signal=28%	516/4726/471/6391/9605/8034/2181/514/109/2639/79877/506/11001/4701/4710/515/196883/55902/4725/50808/498/5471/65018/55811/31/2618/5198/4704/9551/64834/5164/4830/32/522/4717/4731/4723/10632/9524/4706/126328/60490/4712/4707/4705/113/521/517/6390/4695/27109/4722/509/4711/4709/60481/4696/4716/353/539	10:Monocyte	2			Whole PE	hsa04623	Cytosolic DNA-sensing pathway	56	0.439887	1.67642	0.00410437	0.0217471	0.0151536	2649	tags=38%, list=20%, signal=30%	4792/1777/197259/3428/10146/3665/5435/4790/115004/29108/5093/10621/25939/5437/834/3627/3661/79792/51082/5970/103	13:Fibroblast	1			Whole PE	R-HSA-69613	p53-Independent G1/S DNA damage checkpoint	50	0.734935	2.56622	1e-10	2.82879e-09	2.30622e-09	2419	tags=70%, list=15%, signal=60%	5692/5709/5685/5710/10213/5713/7314/5717/5700/5695/5682/5684/5690/5687/9861/5688/5701/5691/10197/5704/5686/5683/5721/5714/5689/7311/7979/7316/5693/5719/5702/6233/5705/5694/5720	1:CTB	2
Whole PE	GO:0051236	establishment of RNA localization	144	-0.373021	-1.57721	0.00152555	0.0438761	0.0379861	3399	tags=34%, list=25%, signal=26%	7919/9818/11260/23144/10482/55308/57510/10762/23089/9688/79902/4869/9972/3178/4927/8021/91746/9984/10128/545/6830/3181/23636/4116/64901/65125/4928/9804/51092/9631/8563/56943/23225/4600/51637/8086/11052/29074/9793/6741/65110/80145/7884/9775/7538/677/472/55110/10643	10:Monocyte	2			Whole PE	hsa04740	Olfactory transduction	29	-0.573513	-1.72622	0.00476662	0.0246094	0.0171482	1569	tags=38%, list=12%, signal=33%	2774/5567/805/817/81285/143503/156/5592/109/83988/6546	13:Fibroblast	1			Whole PE	R-HSA-1234176	Oxygen-dependent proline hydroxylation of Hypoxia-inducible Factor Alpha	64	0.692726	2.56041	1e-10	2.82879e-09	2.30622e-09	2558	tags=64%, list=16%, signal=54%	112399/5692/5709/5685/5710/10213/5713/7314/5717/5700/5695/5682/5684/5690/5687/9861/5688/5701/5691/10197/5704/5686/6921/5683/5721/5714/5689/7311/7979/7316/5693/5719/5702/9978/7323/6233/5705/112398/5694/5720/6923	1:CTB	2
Whole PE	GO:0072522	purine-containing compound biosynthetic process	208	-0.337338	-1.4916	0.00168027	0.0462242	0.040019	2913	tags=41%, list=21%, signal=33%	201163/79071/51816/30968/4907/4831/513/108/9374/8833/10135/10891/4708/4713/23057/516/4726/471/6391/9605/54956/8034/56952/2181/514/109/2639/79877/506/11001/4701/4710/515/196883/55902/4725/50808/498/5471/65018/349565/55811/31/55191/2618/5198/1716/65220/4704/3620/9551/64834/5164/4830/6470/32/522/4717/4731/4723/10632/9524/4706/126328/60490/4712/4707/4705/113/1633/521/517/6390/4695/27109/4722/4507/509…	10:Monocyte	2			Whole PE	hsa04929	GnRH secretion	45	-0.520223	-1.69333	0.00478324	0.0246094	0.0171482	2640	tags=42%, list=20%, signal=34%	2550/5594/5331/10000/3265/779/2776/5295/7220/2100/2767/5894/207/208/3708/775/5290/3709/23236	13:Fibroblast	1			Whole PE	R-HSA-71291	Metabolism of amino acids and derivatives	319	0.559026	2.5491	1e-10	2.82879e-09	2.30622e-09	3562	tags=51%, list=22%, signal=41%	6224/125061/23521/6124/4357/5692/191/9380/9349/6218/5709/6128/5685/6160/5710/6181/200916/10213/6194/6205/1152/11224/6723/5713/587/6129/6143/1491/5717/9045/6209/6158/7965/9255/6217/6132/5700/5695/6125/6161/5092/6135/29920/5682/1468/8659/9521/256987/5684/6152/6146/6123/5690/8140/6159/5687/6202/6203/6137/6147/25873/6175/9861/5688/5701/5691/6167/38/10197/5704/6176/5686/6154/6157/6208/6139/6165/10247/…	1:CTB	2
Whole PE	GO:0000723	telomere maintenance	145	-0.371192	-1.57277	0.00175662	0.0469061	0.0406093	3839	tags=39%, list=28%, signal=29%	9156/4683/5588/79618/10694/79677/56252/54617/22948/7520/26272/898/2072/5888/84464/9894/112441434/85456/9134/55226/100134934/54386/3178/8550/93973/170506/51377/10856/54780/545/3181/10111/79913/79991/10039/3192/5514/548593/10574/283899/5591/55651/64858/7528/328/908/5981/10728/64282/5889/10576/472/7203/3320/3326/10575/6950	10:Monocyte	2			Whole PE	hsa04925	Aldosterone synthesis and secretion	75	-0.432479	-1.53939	0.00606004	0.0303002	0.0211136	1441	tags=25%, list=11%, signal=23%	23683/5567/805/2767/493/817/84876/5581/3708/115/477/5587/775/3777/3709/109/185/111/23236	13:Fibroblast	1			Whole PE	R-HSA-350562	Regulation of ornithine decarboxylase (ODC)	49	0.732488	2.54529	1e-10	2.82879e-09	2.30622e-09	2419	tags=67%, list=15%, signal=58%	5692/5709/5685/5710/10213/5713/5717/5700/5695/5682/5684/5690/5687/9861/5688/5701/5691/10197/5704/5686/5683/5721/4946/5714/5689/7979/5693/5719/5702/5705/4953/5694/5720	1:CTB	2
Whole PE	GO:0032200	telomere organization	150	-0.364817	-1.54822	0.0018859	0.0492349	0.0426255	3839	tags=38%, list=28%, signal=28%	9156/4683/5588/79618/10694/79677/56252/54617/22948/7520/26272/898/2072/5888/84464/9894/112441434/85456/9134/55226/100134934/54386/3178/8550/93973/170506/51377/10856/54780/545/3181/10111/79913/79991/10039/3192/5514/548593/10574/283899/5591/55651/64858/7528/328/908/5981/10728/64282/5889/10576/472/7203/3320/3326/10575/6950	10:Monocyte	2			Whole PE	hsa04913	Ovarian steroidogenesis	32	-0.541263	-1.65928	0.00627144	0.0305506	0.021288	2118	tags=31%, list=16%, signal=26%	5566/3480/5567/3292/10965/8605/115/3294/109/111	13:Fibroblast	1			Whole PE	R-HSA-8854050	FBXL7 down-regulates AURKA during mitotic entry and in early mitosis	53	0.716509	2.53995	1e-10	2.82879e-09	2.30622e-09	2419	tags=70%, list=15%, signal=60%	5692/5709/5685/5710/10213/5713/7314/5717/5700/5695/5682/5684/6500/5690/5687/9861/5688/5701/5691/10197/5704/5686/5683/5721/5714/5689/7311/7979/7316/5693/5719/5702/9978/6233/5705/5694/5720	1:CTB	2
Whole PE	GO:0060627	regulation of vesicle-mediated transport	393	0.33609	1.82958	1.38999e-09	1.34082e-06	1.16082e-06	1909	tags=26%, list=14%, signal=23%	5291/967/6281/11252/3685/3601/382/5337/5872/613/5795/79890/10211/9146/3958/8877/60682/23327/51762/399687/5724/80230/196527/6556/23400/5978/1902/5879/51429/302/396/7251/27342/30844/10859/3916/55680/7097/5898/2358/6813/348/8898/811/10938/4289/4035/3684/140885/6347/867/6385/6714/84062/7474/8832/961/5530/5908/4905/4067/3553/57617/9765/5533/6804/84961/6504/1535/128637/10461/2213/22943/9545/10434/344/3…	10:Monocyte	1			Whole PE	hsa04725	Cholinergic synapse	78	-0.437502	-1.56701	0.00628223	0.0305506	0.021288	2544	tags=35%, list=20%, signal=28%	5594/5331/10000/3265/5566/779/9132/56479/2776/5295/59345/5567/2767/817/2792/207/208/3708/115/775/2770/3717/5290/3709/109/111/23236	13:Fibroblast	1			Whole PE	R-HSA-9604323	Negative regulation of NOTCH4 signaling	53	0.716156	2.5387	1e-10	2.82879e-09	2.30622e-09	2419	tags=72%, list=15%, signal=61%	5692/5709/5685/10460/5710/10213/5713/7314/5717/5700/5695/5682/5684/6500/5690/5687/9861/5688/5701/5691/10197/5704/5686/5683/5721/5714/5689/7311/7979/7316/5693/5719/5702/9978/6233/5705/5694/5720	1:CTB	2
Whole PE	GO:0001568	blood vessel development	495	0.298863	1.67667	2.84306e-08	1.99454e-05	1.72679e-05	1964	tags=24%, list=14%, signal=21%	5291/28996/5315/1890/1545/5311/4763/3688/5797/3685/2896/2069/25976/290/196/57007/387/9146/8877/5598/4193/58504/6672/8828/1959/302/2683/22846/8613/9475/6237/2004/2022/3569/51129/4327/10512/639/10000/51162/6461/7048/348/7423/7040/4814/54453/207/7042/3576/2048/4035/861/56005/6347/3606/83605/55636/10298/2152/1499/7474/10959/3716/29072/961/9990/92140/28984/51330/3696/694/161742/3553/10370/10519/3552/7…	10:Monocyte	1			Whole PE	hsa04210	Apoptosis	118	0.343358	1.47547	0.00640436	0.0307236	0.0214086	2085	tags=32%, list=16%, signal=27%	4217/4616/1509/1647/1513/1522/84790/7185/8722/330/4792/27113/1512/1508/8795/1514/3725/9020/4790/9451/2081/1649/10018/5605/839/3845/824/5291/84823/329/54205/578/7277/468/2353/5604/7124/55367	13:Fibroblast	1			Whole PE	R-HSA-351202	Metabolism of polyamines	55	0.710271	2.53742	1e-10	2.82879e-09	2.30622e-09	2923	tags=67%, list=18%, signal=55%	5692/5709/5685/5710/10213/6723/5713/5717/5700/5695/5682/5684/5690/5687/9861/5688/5701/5691/10197/5704/5686/5683/5721/4946/5714/5689/7979/5693/5719/5702/5705/4953/5694/5720/5706/262/113451	1:CTB	2
Whole PE	GO:0048514	blood vessel morphogenesis	426	0.313236	1.7226	3.37104e-08	2.0011e-05	1.73247e-05	1917	tags=24%, list=14%, signal=22%	5291/28996/5315/1890/1545/5311/4763/3688/5797/3685/2896/2069/25976/290/57007/387/9146/8877/5598/58504/6672/8828/302/2683/22846/9475/6237/2004/2022/3569/51129/4327/639/10000/51162/6461/7048/348/7423/7040/4814/54453/207/7042/3576/2048/4035/861/56005/6347/3606/83605/55636/10298/2152/1499/7474/3716/29072/961/9990/92140/28984/51330/3696/694/161742/3553/10370/10519/3552/719/80025/26051/101/3678/4092/13…	10:Monocyte	1			Whole PE	hsa04940	Type I diabetes mellitus	21	0.577641	1.77812	0.007339	0.0336952	0.0234792	834	tags=29%, list=6%, signal=27%	3133/3106/3107/3115/3329/3105	13:Fibroblast	1			Whole PE	R-HSA-180585	Vif-mediated degradation of APOBEC3G	52	0.71838	2.53411	1e-10	2.82879e-09	2.30622e-09	2558	tags=73%, list=16%, signal=62%	5692/5709/5685/5710/10213/5713/7314/5717/5700/5695/5682/5684/5690/5687/9861/5688/5701/5691/10197/5704/5686/6921/5683/5721/5714/5689/7311/7979/7316/5693/5719/5702/9978/6233/5705/5694/5720/6923	1:CTB	2
Whole PE	GO:0010256	endomembrane system organization	468	0.304278	1.69505	3.27886e-08	2.0011e-05	1.73247e-05	1980	tags=26%, list=15%, signal=23%	6281/112574/5728/11252/26985/79026/9648/10211/9146/5119/2647/5339/6836/23136/399687/196527/3064/29927/3267/533/51606/89781/23603/23141/51429/23471/302/50999/81488/7251/8546/7110/80124/84376/55968/5990/55969/2580/79895/55151/207/7042/79666/143187/50807/23271/55666/54808/51100/84062/91782/2054/10959/84272/1378/118813/2804/51014/57142/55831/4905/9296/57617/64145/54732/6804/10254/55654/10783/128637/5…	10:Monocyte	1			Whole PE	hsa04217	Necroptosis	98	0.350723	1.46876	0.00749837	0.0336952	0.0234792	2346	tags=32%, list=18%, signal=26%	8878/2512/2495/10379/7128/330/6773/197259/3320/8795/6772/55072/5610/29108/3326/5836/5837/824/148022/3455/834/329/6776/124044/353376/6609/7416/7124/128866/51652/7297	13:Fibroblast	1			Whole PE	R-HSA-450531	Regulation of mRNA stability by proteins that bind AU-rich elements	85	0.651023	2.53378	1e-10	2.82879e-09	2.30622e-09	2419	tags=60%, list=15%, signal=51%	5692/3315/5709/5685/5710/10213/5713/7314/7538/7529/5717/8125/3304/56915/5700/5695/677/5682/5684/5690/5687/9861/5688/5701/5691/10197/5704/5686/8570/5683/5721/26986/23404/5714/5689/7311/7979/7316/23016/5693/5719/51013/11340/5702/6233/5705/6418/54512/5694/3312/5720	1:CTB	2
Whole PE	GO:0030100	regulation of endocytosis	220	0.375057	1.92072	7.0067e-08	3.60472e-05	3.12081e-05	1847	tags=30%, list=14%, signal=26%	5291/967/11252/3685/3601/382/613/5795/79890/10211/3958/8877/60682/23327/399687/80230/196527/6556/1902/5879/51429/302/7251/27342/30844/10859/55680/7097/5898/2358/348/8898/811/4289/4035/140885/6347/867/6714/84062/7474/961/5530/3553/9765/5533/1535/10461/2213/22943/344/341/22848/55697/79872/274/6850/5770/929/8291/5071/90678/114781/567/998	10:Monocyte	1			Whole PE	hsa04350	TGF-beta signaling pathway	92	-0.420472	-1.5473	0.00790884	0.0350955	0.024455	2917	tags=38%, list=22%, signal=30%	655/151449/91/3066/4086/5594/2331/5515/7057/1387/4087/23592/25805/4089/9611/6667/659/3065/6093/653/657/2200/4091/4093/7027/3397/7046/7042/3399/3400/5308/57154/4090/9765/7043	13:Fibroblast	1			Whole PE	R-HSA-4641258	Degradation of DVL	55	0.705943	2.52196	1e-10	2.82879e-09	2.30622e-09	2419	tags=67%, list=15%, signal=57%	5692/5709/5685/5710/10213/5713/7314/5717/5700/5695/5682/5684/5690/5687/9861/5688/5701/5691/10197/5704/5686/5683/5721/5714/5689/7311/7979/7316/5693/5719/1855/5702/9978/6233/5705/5694/5720	1:CTB	2
Whole PE	GO:0009611	response to wounding	401	0.307821	1.67908	1.89719e-07	8.61214e-05	7.45602e-05	1831	tags=22%, list=13%, signal=20%	5291/308/6281/960/5728/4763/3688/2896/2069/1809/5055/79026/387/6507/5119/1495/5339/196527/6648/6556/89790/89781/5879/6696/302/5025/2683/8546/22846/8613/7094/2004/3569/7099/664/348/7040/7056/7042/51206/11057/3611/2048/6385/57591/6868/1192/6714/2152/84062/7474/91782/5530/83999/5894/51330/4067/83706/2768/3552/10461/5328/3678/706/10894/1364/5270/135/1605/7128/135228/6850/84750/5265/5605/9525/26258/79…	10:Monocyte	1			Whole PE	hsa05332	Graft-versus-host disease	20	0.596624	1.81308	0.0091881	0.0402688	0.0280598	834	tags=30%, list=6%, signal=28%	3133/3106/3107/3115/3824/3105	13:Fibroblast	1			Whole PE	R-HSA-75815	Ubiquitin-dependent degradation of Cyclin D	50	0.722094	2.52138	1e-10	2.82879e-09	2.30622e-09	2419	tags=70%, list=15%, signal=60%	5692/5709/5685/5710/10213/5713/7314/5717/5700/5695/5682/5684/5690/5687/9861/5688/5701/5691/10197/5704/5686/5683/5721/5714/5689/7311/7979/7316/5693/5719/5702/6233/5705/5694/5720	1:CTB	2
Whole PE	GO:0030335	positive regulation of cell migration	408	0.300831	1.6571	2.01732e-07	8.64868e-05	7.48766e-05	1857	tags=24%, list=14%, signal=21%	5291/54434/9732/1545/56034/3688/3685/382/2896/2260/57007/387/3958/8877/5724/196527/6648/4193/1902/5879/8828/8772/4249/5025/3554/8613/9475/6237/3569/23060/10512/2358/10000/7099/7048/7423/7040/811/54453/207/7042/3576/2048/85440/6868/4233/6714/2152/7474/10059/6354/961/57142/5530/23625/4067/83706/3553/10519/3552/719/9373/6504/101/10501/2526/2821/5328/394/659/3678/10894/1364/6282/10488/9693/79872/5769…	10:Monocyte	1			Whole PE	hsa05412	Arrhythmogenic right ventricular cardiomyopathy	61	-0.454836	-1.55474	0.00942712	0.0408125	0.0284387	1045	tags=28%, list=8%, signal=26%	1837/783/60/6442/6641/6934/6262/51176/1832/3675/775/8910/3680/29119/6546/3908/3672	13:Fibroblast	1			Whole PE	R-HSA-180534	Vpu mediated degradation of CD4	50	0.721296	2.51859	1e-10	2.82879e-09	2.30622e-09	2419	tags=72%, list=15%, signal=62%	5692/5709/5685/5710/10213/5713/7314/5717/5700/5695/5682/5684/6500/5690/5687/9861/5688/5701/5691/10197/5704/5686/5683/5721/5714/5689/7311/7979/7316/5693/5719/5702/6233/5705/5694/5720	1:CTB	2
Whole PE	GO:0006898	receptor-mediated endocytosis	200	0.373691	1.89682	4.20425e-07	0.000162221	0.000140444	1477	tags=24%, list=11%, signal=21%	5291/967/1514/2885/3688/975/3685/382/57007/79890/10211/9146/9260/60682/821/57720/1902/5879/51429/302/27342/10859/2060/5898/348/2580/8898/10244/11006/3576/4289/4035/3684/867/84062/200576/2213/22943/344/10894/341/22848/115548/55697/1213/4481/6850	10:Monocyte	1			Whole PE	hsa04330	Notch signaling pathway	56	-0.460113	-1.55309	0.00989201	0.0423092	0.0294816	3118	tags=39%, list=24%, signal=30%	5663/54567/7091/3066/1387/84441/151636/55534/7090/9541/8650/23493/3065/83737/9612/6310/4853/1857/441478/26508/182/4854	13:Fibroblast	1			Whole PE	R-HSA-1236978	Cross-presentation of soluble exogenous antigens (endosomes)	46	0.728353	2.51555	1e-10	2.82879e-09	2.30622e-09	2419	tags=67%, list=15%, signal=58%	5692/5709/5685/5710/10213/5713/5717/5700/5695/5682/5684/5690/5687/9861/5688/5701/5691/10197/5704/5686/5683/5721/5714/5689/7979/5693/5719/5702/5705/5694/5720	1:CTB	2
Whole PE	GO:2000147	positive regulation of cell motility	422	0.297667	1.64075	4.61832e-07	0.000169712	0.00014693	1857	tags=23%, list=14%, signal=21%	5291/54434/9732/1545/56034/3688/3685/382/2896/2260/57007/387/3958/8877/5724/196527/6648/4193/1902/5879/8828/8772/4249/5025/3554/8613/9475/6237/3569/23060/10512/2358/10000/7099/7048/7423/7040/811/54453/207/7042/3576/2048/85440/6868/4233/6714/2152/7474/10059/6354/961/57142/5530/23625/4067/83706/3553/10519/3552/719/9373/6504/101/10501/2526/2821/5328/394/659/3678/1672/10894/1364/6282/10488/9693/79872…	10:Monocyte	1			Whole PE	hsa04621	NOD-like receptor signaling pathway	131	0.319583	1.38891	0.011202	0.0467849	0.0326003	1567	tags=26%, list=12%, signal=23%	7187/4938/2920/3576/10379/7128/330/4792/24145/6773/3320/3428/1508/7295/6772/8767/3665/3725/4790/84674/837/4939/55072/29108/11337/3326/81631/10135/2919/148022/3455/834/329/6347	13:Fibroblast	1			Whole PE	R-HSA-174113	SCF-beta-TrCP mediated degradation of Emi1	53	0.705507	2.50095	1e-10	2.82879e-09	2.30622e-09	2419	tags=70%, list=15%, signal=60%	5692/991/5709/5685/5710/10213/5713/7314/5717/5700/5695/5682/5684/6500/5690/5687/9861/5688/5701/5691/10197/5704/5686/5683/5721/5714/5689/7311/7979/7316/5693/5719/5702/6233/5705/5694/5720	1:CTB	2
Whole PE	GO:0009266	response to temperature stimulus	122	-0.476348	-1.97909	7.61975e-07	0.000245007	0.000212116	751	tags=20%, list=6%, signal=20%	7266/3315/6335/9451/8892/11080/34/2475/440275/7852/472/10049/51501/3329/3303/55466/3320/3326/51278/3304/3310/3337/9531/3301/26973	10:Monocyte	1			Whole PE	hsa05014	Amyotrophic lateral sclerosis	314	0.422082	1.91745	1.89208e-10	9.6496e-09	7.88129e-09	4574	tags=50%, list=28%, signal=36%	7277/9001/5879/5692/7280/6647/5709/515/5685/10381/5710/10213/7132/5713/55967/4725/5717/10482/2081/2906/5216/91181/5700/5695/2878/5682/81929/4718/4696/5684/56893/7388/7381/5690/11047/10671/5687/10476/10189/9861/5688/8878/509/5701/5691/5704/84790/3178/5686/6428/1340/5683/203068/7846/4700/539/1347/27089/10280/5714/54205/5689/7979/10383/4218/23130/79023/514/5693/5719/51079/572/5702/834/4712/79139/440…	1:CTB	1			Whole PE	R-HSA-9824272	Somitogenesis	52	0.707154	2.49451	1e-10	2.82879e-09	2.30622e-09	2430	tags=67%, list=15%, signal=57%	5692/5709/5685/5710/10213/5713/5717/5700/5695/5682/5684/5690/5687/9861/2043/5688/5701/5691/10197/5704/5686/5683/5721/5714/5689/7979/5693/5719/5702/3955/5705/5694/84667/5720/6911	1:CTB	2
Whole PE	GO:0042060	wound healing	305	0.321426	1.72674	1.23554e-06	0.0003214	0.000278254	1831	tags=23%, list=13%, signal=20%	5291/308/6281/960/5728/4763/3688/2069/5055/79026/387/5119/5339/196527/6556/89781/302/2683/8546/8613/7094/2004/3569/7099/348/7040/7056/7042/51206/3611/2048/6385/57591/6868/1192/6714/2152/84062/7474/91782/5530/5894/51330/4067/83706/2768/3552/10461/5328/3678/1364/5270/135/1605/7128/135228/6850/84750/5265/9525/26258/160851/3091/10565/79643/6812/6484/309/5592/5465	10:Monocyte	1			Whole PE	hsa05016	Huntington disease	269	0.440666	1.97508	2.43588e-10	1.08701e-08	8.87815e-09	4185	tags=48%, list=26%, signal=36%	7277/9001/5692/7280/6647/5437/5709/515/5685/10381/5710/10213/5331/5713/55967/4725/5717/2081/5700/5695/2878/5682/5439/5436/9586/4718/7052/4696/5684/7388/7381/5690/11047/10671/5687/10476/1212/5435/9861/5688/509/5701/5691/5704/84790/5686/1340/5683/203068/7846/4700/539/1347/27089/5714/54205/5689/7979/10383/1175/23130/514/5693/5719/51079/5438/5702/4712/1211/4715/9377/4710/842/5705/4728/516/5434/7416/7…	1:CTB	1			Whole PE	R-HSA-4608870	Asymmetric localization of PCP proteins	60	0.685032	2.49241	1e-10	2.82879e-09	2.30622e-09	2489	tags=65%, list=15%, signal=55%	5692/5709/5685/5710/10213/5713/7314/5717/5700/5695/5682/5684/5690/5687/9861/5688/7474/5701/5691/10197/5704/5686/5683/8324/5721/5714/5689/7311/7979/7316/5693/5719/5702/6233/5705/8322/5694/5720/50855	1:CTB	2
Whole PE	GO:0040017	positive regulation of locomotion	432	0.287806	1.58404	2.32217e-06	0.000512006	0.000443273	1857	tags=23%, list=14%, signal=20%	5291/54434/9732/1545/56034/3688/3685/382/2896/2260/57007/387/3958/8877/5724/196527/6648/4193/1902/5879/8828/8772/4249/5025/3554/8613/9475/6237/3569/23060/10512/2358/10000/7099/7048/7423/7040/811/54453/207/7042/3576/2048/85440/6868/4233/6714/2152/7474/10059/6354/961/57142/5530/23625/4067/83706/3553/10519/3552/719/9373/6504/101/10501/2526/2821/5328/394/659/3678/1672/10894/1364/6282/10488/9693/79872…	10:Monocyte	1			Whole PE	hsa05022	Pathways of neurodegeneration - multiple diseases	406	0.38747	1.79496	3.78285e-09	1.50053e-07	1.22556e-07	4185	tags=42%, list=26%, signal=32%	7277/9001/5879/5692/7280/6647/7332/5709/515/5685/10381/5710/10213/7132/5331/5595/5713/7314/808/55967/4725/81029/5717/2081/51465/2906/5700/5695/2878/5682/8851/4718/4696/5684/7388/7381/5690/11047/10671/578/5687/1454/10476/801/9861/1460/5688/8878/509/7474/5701/5691/5704/8772/9246/84790/5686/1340/5683/8324/203068/7846/4700/3552/539/1347/27089/10280/5714/54205/5689/7311/11315/7979/10383/7316/4218/2313…	1:CTB	1			Whole PE	R-HSA-1234174	Cellular response to hypoxia	72	0.653443	2.47171	1e-10	2.82879e-09	2.30622e-09	2558	tags=61%, list=16%, signal=52%	112399/5692/5709/5685/5710/10370/10213/5713/7314/5717/5700/5695/5682/5684/5690/7422/5687/9861/5688/5701/5691/10197/5704/5686/6921/5683/5721/25994/5714/5689/7311/7979/7316/5693/5719/5702/9978/7323/6233/5705/112398/5694/5720/6923	1:CTB	2
Whole PE	GO:0034605	cellular response to heat	54	-0.572105	-2.07941	3.72135e-06	0.000776152	0.00067196	751	tags=28%, list=6%, signal=26%	1965/7266/2475/472/10049/51501/3303/3320/3326/51278/3304/3310/3337/9531/26973	10:Monocyte	1			Whole PE	hsa05010	Alzheimer disease	324	0.393585	1.78747	3.29327e-08	1.06882e-06	8.72954e-07	4185	tags=44%, list=26%, signal=33%	7277/5692/7280/5709/515/5685/10381/348/5710/10213/7132/5331/5595/5713/808/55967/55630/4725/81029/5717/2081/2906/5700/5695/2597/5682/8851/4718/4696/5684/7388/7381/5690/11047/5687/1454/10476/10313/801/9861/1460/5688/509/7474/5701/5691/5704/8772/84790/5686/1340/5683/8324/203068/7846/4700/3552/539/1347/27089/5714/54205/5689/7979/10383/23130/514/5693/5719/51079/572/1855/5702/5481/4712/4715/9377/4710/8…	1:CTB	1			Whole PE	R-HSA-5362768	Hh mutants are degraded by ERAD	53	0.695794	2.46652	1e-10	2.82879e-09	2.30622e-09	2419	tags=68%, list=15%, signal=58%	5692/5709/5685/5710/10213/5713/7314/5717/5700/5695/5682/5684/5690/5687/9861/5688/5701/5691/10197/5704/5686/5683/5721/5714/5689/7311/7979/7316/5693/5719/5702/6233/5705/7415/5694/5720	1:CTB	2
Whole PE	GO:0090520	sphingolipid mediated signaling pathway	13	0.819801	2.33413	3.85866e-06	0.000783612	0.000678419	655	tags=38%, list=5%, signal=37%	5291/8877/5879/8613/207	10:Monocyte	1			Whole PE	hsa04932	Non-alcoholic fatty liver disease	138	0.426859	1.78428	4.01305e-05	0.00102333	0.000835801	5122	tags=59%, list=31%, signal=41%	5879/7132/55967/4725/51094/2081/2353/22877/4718/4696/998/7388/3576/7381/1340/4296/4700/3552/1347/27089/54205/51079/4712/4715/9377/4710/9021/4728/5603/7385/4709/4731/1329/4697/1327/10975/29796/1350/1649/4704/637/4717/6392/6945/4722/9167/7040/5293/4720/4726/7494/207/4706/4702/4701/6256/5970/1351/4695/3725/1965/1337/4708/3667/4724/374291/4716/4707/4713/1345/4729/4711/581/3643/6390/5571/56901/7124/54…	1:CTB	1			Whole PE	R-HSA-174184	Cdc20:Phospho-APC/C mediated degradation of Cyclin A	69	0.654787	2.44143	1e-10	2.82879e-09	2.30622e-09	2457	tags=62%, list=15%, signal=53%	5692/991/5709/5685/27338/5710/10213/5713/7314/5717/5700/5695/5682/5684/5690/5687/9861/5688/5701/5691/10197/5704/5686/5683/5721/5714/5689/7311/7979/7316/7324/5693/5719/5702/6233/11065/5705/4085/701/5694/890/5720/246184	1:CTB	2
Whole PE	GO:0048261	negative regulation of receptor-mediated endocytosis	23	0.707776	2.3249	7.48646e-06	0.0014091	0.00121994	1239	tags=39%, list=9%, signal=36%	3685/382/79890/5879/302/27342/8898/344/341	10:Monocyte	1			Whole PE	hsa05415	Diabetic cardiomyopathy	165	0.396755	1.68332	7.69988e-05	0.00183257	0.00149675	4574	tags=52%, list=28%, signal=37%	5879/1535/515/5331/55967/4725/2997/6513/2597/4718/4696/7388/7381/10476/5590/509/1340/5166/948/4700/539/1347/27089/9945/514/51079/4712/4715/9377/4710/4728/516/5603/7416/7385/4709/4689/4731/1329/489/4697/1327/10975/29796/1350/1277/5580/5579/518/4704/4717/6392/4722/9167/7040/5293/4720/4726/7417/207/4706/9882/4702/4701/5970/5524/1351/4695/1337/522/517/4708/513/3667/4724/374291/4716/4707/5499/5880/471…	1:CTB	1			Whole PE	R-HSA-179419	APC:Cdc20 mediated degradation of cell cycle proteins prior to satisfation of the cell cycle checkpoint	70	0.64769	2.42889	1e-10	2.82879e-09	2.30622e-09	2457	tags=61%, list=15%, signal=52%	5692/991/5709/5685/27338/5710/10213/5713/7314/5717/5700/5695/5682/5684/5690/5687/9861/5688/5701/5691/10197/5704/5686/5683/5721/5714/5689/7311/7979/7316/7324/5693/5719/5702/6233/11065/5705/4085/701/5694/890/5720/246184	1:CTB	2
Whole PE	GO:0032368	regulation of lipid transport	97	0.434563	1.961	7.99928e-06	0.00143559	0.00124287	2471	tags=41%, list=18%, signal=34%	55754/3685/4282/23461/6836/6696/302/5025/158219/7110/56729/348/207/4035/4790/10765/3553/5443/3552/706/344/341/1622/19/5045/6850/4923/6256/5071/5465/116150/654/1071/5580/5468/10396/9536/1601/3952/114897	10:Monocyte	1			Whole PE	hsa03008	Ribosome biogenesis in eukaryotes	68	0.476179	1.7819	0.000330268	0.00589528	0.00481496	3487	tags=46%, list=21%, signal=36%	25996/4809/55651/55505/10436/55272/10482/5901/27341/51119/1460/10248/51602/28987/10775/2091/55341/10557/92856/26354/6949/10556/65083/10799/10940/3692/51096/10528/10199/54433/51367	1:CTB	1			Whole PE	R-HSA-5358346	Hedgehog ligand biogenesis	61	0.66664	2.42452	1e-10	2.82879e-09	2.30622e-09	2419	tags=59%, list=15%, signal=50%	5692/5709/5685/5710/10213/5713/7314/5717/5700/5695/5682/5684/5690/5687/9861/5688/5701/5691/10197/5704/5686/5683/5721/5714/5689/7311/7979/7316/5693/5719/5702/6233/5705/7415/5694/5720	1:CTB	2
Whole PE	GO:2000146	negative regulation of cell motility	223	0.3334	1.70412	8.37767e-06	0.00146933	0.00127208	1021	tags=19%, list=8%, signal=18%	2309/9839/5728/1545/4763/5797/4282/25942/1809/613/5795/3622/51094/79890/387/1495/6672/5879/23603/5926/5734/79595/57522/22846/27342/6237/2022/348/4286/7040/811/207/11057/57406/4035/6347/23598/1602/28984/2768/161742/10370	10:Monocyte	1			Whole PE	hsa04061	Viral protein interaction with cytokine and cytokine receptor	63	0.478592	1.76921	0.000803605	0.0130403	0.0106506	2868	tags=29%, list=18%, signal=24%	2920/4055/6846/7132/2919/2921/3576/1230/6352/3606/51554/3587/6375/7852/29949/7133/146433/3588	1:CTB	1			Whole PE	R-HSA-1236974	ER-Phagosome pathway	84	0.623267	2.41773	1e-10	2.82879e-09	2.30622e-09	2856	tags=54%, list=18%, signal=44%	5692/567/5709/5685/5710/10213/5713/7314/5717/5700/5695/5682/5684/5690/5687/9861/5688/5701/5691/10197/5704/5686/5683/5721/8673/948/5714/5689/7311/7979/7316/9341/5693/5719/5702/6233/5705/5694/5720/3107/23480/10952/6810/6892/5706	1:CTB	2
Whole PE	GO:0072521	purine-containing compound metabolic process	372	-0.34681	-1.61626	8.84182e-06	0.00151627	0.00131273	3129	tags=35%, list=23%, signal=28%	4708/5144/10965/4713/23057/27284/84188/84836/10005/516/130752/27115/4726/471/6391/9605/525/54956/3418/8034/56952/2181/64087/3704/9429/4200/514/109/2639/136332/4191/79877/506/11001/51024/8876/4701/4710/515/2773/2330/196883/51292/55902/4725/6296/526/50808/498/5471/65018/785/349565/55811/2272/31/55191/2618/5198/1716/8622/23171/54995/65220/4704/25939/3620/9551/64834/5164/3417/10591/4830/8801/6470/32/…	10:Monocyte	1			Whole PE	hsa04110	Cell cycle	149	-0.555599	-1.82362	4.10947e-09	4.73959e-07	3.57596e-07	3509	tags=53%, list=22%, signal=42%	5001/27127/4176/25847/5515/995/5000/8379/5527/51433/114799/993/157570/11200/8556/7465/9212/1029/10971/5347/9134/1017/545/1021/8317/64682/2033/5925/8454/8318/9184/8881/7533/26271/902/7272/23063/890/151648/4172/2932/51434/9126/4999/1871/5885/27085/10403/472/7029/23244/5529/7027/1026/1663/8555/4085/57082/113130/701/983/996/4087/90381/6502/29945/23047/10274/699/25836/5591/1111/1022/4089/23594/1027/59…	4:CTB-2	1			Whole PE	R-HSA-176409	APC/C:Cdc20 mediated degradation of mitotic proteins	72	0.638131	2.41379	1e-10	2.82879e-09	2.30622e-09	3285	tags=67%, list=20%, signal=53%	5692/991/5709/5685/27338/5710/10213/5713/7314/5717/5700/5695/5682/5684/5690/5687/9861/5688/5701/5691/10197/5704/5686/5683/5721/5714/5689/7311/7979/7316/7324/5693/5719/5702/6233/11065/5705/4085/701/5694/890/5720/246184/983/5706/51529/9232/25906	1:CTB	2
Whole PE	GO:0030336	negative regulation of cell migration	213	0.335921	1.71705	9.90297e-06	0.00160369	0.0013884	1021	tags=19%, list=8%, signal=18%	2309/9839/5728/1545/4763/5797/4282/25942/1809/613/5795/3622/51094/79890/387/6672/5879/23603/5926/5734/79595/57522/22846/27342/6237/2022/348/4286/7040/811/207/11057/57406/4035/6347/23598/1602/28984/2768/161742/10370	10:Monocyte	1			Whole PE	hsa03460	Fanconi anemia pathway	51	-0.626966	-1.86047	1.33064e-05	0.000920804	0.000694735	3176	tags=55%, list=20%, signal=44%	2178/378708/116028/5888/5889/146956/545/6117/2189/2177/22909/4292/51426/80010/672/57599/79728/7398/55215/2176/641/5980/51455/2175/83990/5429/57697/675	4:CTB-2	1			Whole PE	R-HSA-4086400	PCP/CE pathway	87	0.607368	2.37275	1e-10	2.82879e-09	2.30622e-09	2965	tags=60%, list=18%, signal=49%	5879/5692/5709/5685/5710/10213/387/5713/7314/81029/5717/5216/5700/5695/5682/5684/5690/5687/1212/9861/5688/7474/5701/5691/10197/5704/5686/5683/8324/5721/5881/5714/5689/7311/7979/7316/1175/5693/5719/1855/5702/6233/1211/5705/8322/5694/5720/50855/5579/7481/5706/160	1:CTB	2
Whole PE	GO:0070848	response to growth factor	485	0.271518	1.51996	9.67839e-06	0.00160369	0.0013884	2660	tags=29%, list=20%, signal=24%	5291/28996/967/960/9839/2885/382/860/25942/2260/3622/2889/9146/8877/9404/5598/5494/1848/4193/8828/5926/79595/9475/30844/2908/8036/92/2022/5970/7099/51341/7048/6715/7423/7040/23390/10938/207/7042/1454/3576/5654/3611/6347/867/6868/10755/6714/3987/1499/7474/23770/118813/5894/23625/3696/10765/161742/3553/5782/4221/10370/10519/7050/27020/57154/659/3678/22943/4092/64855/9693/114990/8826/6777/9497/51552…	10:Monocyte	1			Whole PE	hsa03440	Homologous recombination	39	-0.647049	-1.85089	2.55668e-05	0.00147435	0.00111238	2820	tags=56%, list=18%, signal=46%	5888/5889/146956/5892/5932/51720/6117/7516/10111/9577/472/4361/672/79728/4683/5890/10714/641/11073/83990/580/675	4:CTB-2	1			Whole PE	R-HSA-1236975	Antigen processing-Cross presentation	97	0.592931	2.34305	1e-10	2.82879e-09	2.30622e-09	2856	tags=48%, list=18%, signal=40%	5692/1535/567/5709/5685/5710/10213/5713/7314/5717/5700/5695/5682/5684/5690/5687/9861/5688/5701/5691/10197/5704/5686/5683/5721/8673/948/5714/5689/7311/7979/7316/9341/5693/5719/5702/6233/5705/4689/5694/5720/3107/23480/10952/6810/6892/5706	1:CTB	2
Whole PE	GO:0006869	lipid transport	296	0.304903	1.61348	1.36486e-05	0.00206523	0.00178799	2472	tags=28%, list=18%, signal=24%	55754/28231/3685/4282/55187/23461/55852/6836/196527/23230/3783/5306/114885/6696/302/5025/26207/158219/7110/26020/56729/348/84879/79895/207/51228/5305/4035/4790/84725/5826/10765/23760/51542/3553/5443/10999/3552/11309/58488/706/10434/344/341/286046/2171/1622/5825/19/4481/5045/6850/9525/4923/6256/28232/57655/55275/23344/81537/10577/134429/5071/5465/6580/116150/366/114882/654/1071/3990/8714/5580/1376…	10:Monocyte	1			Whole PE	hsa05150	Staphylococcus aureus infection	46	0.503131	1.98548	7.23843e-05	0.00313062	0.00236201	2048	tags=30%, list=13%, signal=27%	3123/25984/712/3875/3122/3383/3689/3117/714/1675/713/2214/3872/2212	4:CTB-2	1			Whole PE	R-HSA-349425	Autodegradation of the E3 ubiquitin ligase COP1	50	0.702895	2.45434	1.10401e-10	2.99694e-09	2.44331e-09	2419	tags=70%, list=15%, signal=60%	5692/5709/5685/5710/10213/5713/7314/5717/5700/5695/5682/5684/5690/5687/9861/5688/5701/5691/10197/5704/5686/5683/5721/5714/5689/7311/7979/7316/5693/5719/5702/6233/5705/5694/5720	1:CTB	2
Whole PE	GO:0040013	negative regulation of locomotion	246	0.320227	1.66065	1.39203e-05	0.00206583	0.00178851	1280	tags=20%, list=9%, signal=18%	2309/9839/5728/1545/4763/5797/4282/25942/1809/613/5795/3622/51094/79890/387/1495/6672/5879/23603/5926/5734/79595/57522/22846/27342/6237/2022/10512/348/4286/7040/811/207/11057/57406/4035/6347/7474/23598/1602/28984/2768/161742/10370/10501/684/4092/57561/6259	10:Monocyte	1			Whole PE	hsa04914	Progesterone-mediated oocyte maturation	86	-0.524503	-1.6603	0.000104812	0.00329682	0.00248741	3381	tags=45%, list=22%, signal=36%	25847/102723555/995/8379/115/113/51433/993/6790/112/285955/3835/5347/3480/1017/441273/10000/5594/5291/64682/673/8881/5295/890/5140/1432/51434/5290/5599/4085/5601/983/996/5894/29945/699/3845/5567/2770	4:CTB-2	1			Whole PE	R-HSA-169911	Regulation of Apoptosis	51	0.699018	2.45589	1.1413e-10	3.044e-09	2.48168e-09	2419	tags=69%, list=15%, signal=59%	5692/5709/5685/5710/10213/5713/7314/5717/5700/5695/5682/5684/5690/5687/9861/5688/5701/5691/10197/5704/5686/5683/5721/5714/5689/7311/7979/7316/5693/5719/5702/6233/5705/5694/5720	1:CTB	2
Whole PE	GO:0009117	nucleotide metabolic process	404	-0.332252	-1.55957	1.74511e-05	0.00244855	0.00211985	3129	tags=34%, list=23%, signal=27%	4708/5144/10965/4713/23057/27284/84188/84836/10005/516/130752/27115/4726/471/1841/6391/9605/525/79661/54956/3418/8034/2181/64087/3704/11315/4200/514/109/2639/136332/1723/4191/79877/506/11001/51024/8876/4701/4710/7372/7084/515/2773/2330/196883/51292/55902/4725/6296/526/50808/498/5471/65018/785/349565/55811/2272/31/55191/79621/2618/5198/1716/8622/23171/54995/65220/4704/25939/3620/9551/64834/5164/34…	10:Monocyte	1			Whole PE	hsa03013	Nucleocytoplasmic transport	99	-0.511402	-1.63515	8.66403e-05	0.00329682	0.00248741	3093	tags=41%, list=20%, signal=33%	5411/10527/55746/79902/3837/9883/23279/22794/10526/7175/3843/57510/51068/65110/26019/9631/4928/79228/3839/59343/23225/23534/3842/348995/10250/5903/53371/10762/3836/3841/23165/23039/7514/55705/64328/8021/57122/9818/25909/55706/64901	4:CTB-2	1			Whole PE	R-HSA-5678895	Defective CFTR causes cystic fibrosis	59	0.670745	2.42046	1.18539e-10	3.11708e-09	2.54126e-09	2856	tags=66%, list=18%, signal=55%	5692/5709/5685/5710/10213/5713/7314/5717/5700/5695/5682/5684/5690/5687/9861/5688/5701/5691/10197/5704/5686/5683/5721/5714/5689/7311/7979/7316/5693/5719/5702/6233/79139/5705/7415/5694/5720/6048/5706	1:CTB	2
Whole PE	GO:1905952	regulation of lipid localization	120	0.404138	1.87871	1.83723e-05	0.00253176	0.00219189	2391	tags=38%, list=18%, signal=32%	55754/3685/4282/10226/23461/6836/114885/6696/302/5025/3569/158219/7110/56729/348/10938/207/4035/4790/10765/3553/5443/3552/706/344/341/1622/19/4481/5045/6850/4923/6256/5071/5465/116150/114882/654/1071/5580/5468/10396/9536/123/1601/3952	10:Monocyte	1			Whole PE	hsa03082	ATP-dependent chromatin remodeling	84	-0.504439	-1.59411	0.000325153	0.00750019	0.0056588	5297	tags=61%, list=34%, signal=40%	57504/64769/10847/1108/605/64431/79913/7528/54107/29117/23506/8932/10933/54891/6605/9112/9274/54617/51377/4798/5977/26039/55929/5928/54556/10902/57459/54815/125476/2186/86/51773/1107/11177/54108/57634/8467/9031/6599/8289/9219/29994/196528/55193/8295/57492/6760/26122/8089/80314/6595	4:CTB-2	1			Whole PE	R-HSA-69017	CDK-mediated phosphorylation and removal of Cdc6	69	0.635055	2.36786	1.29964e-10	3.32388e-09	2.70985e-09	2457	tags=59%, list=15%, signal=51%	5692/5709/5685/27338/5710/10213/5713/7314/5717/5700/5695/5682/5684/5690/5687/9861/5688/5701/5691/10197/5704/5686/5683/5721/5714/5689/7311/7979/7316/7324/5693/5719/5702/6233/11065/5705/9134/5694/890/5720/246184	1:CTB	2
Whole PE	GO:0071363	cellular response to growth factor stimulus	468	0.267926	1.49254	1.95543e-05	0.00260173	0.00225247	2660	tags=28%, list=20%, signal=24%	5291/28996/967/960/9839/2885/382/860/25942/2260/3622/2889/9146/8877/9404/5598/5494/4193/8828/5926/79595/30844/2908/8036/92/2022/5970/7099/51341/7048/6715/7423/7040/23390/10938/207/7042/1454/3576/5654/3611/6347/867/6868/10755/6714/3987/1499/7474/23770/118813/5894/23625/3696/10765/161742/3553/5782/4221/10370/10519/7050/27020/57154/659/3678/22943/4092/64855/9693/114990/8826/6777/9497/51552/5045/1352…	10:Monocyte	1			Whole PE	hsa04114	Oocyte meiosis	108	-0.483357	-1.55127	0.000381666	0.00825353	0.00622718	3654	tags=45%, list=23%, signal=35%	108/805/27127/286151/25847/102723555/5515/808/995/8379/115/113/5527/51433/5501/6790/112/285955/5534/10971/5347/9134/3480/5532/1017/441273/5594/64682/8454/8881/7533/26271/151648/5500/1432/51434/9126/5529/8945/4085/818/983/996/29945/699/5533/5567/23291/5530	4:CTB-2	1			Whole PE	R-HSA-5610780	Degradation of GLI1 by the proteasome	57	0.670007	2.41161	1.63445e-10	4.12369e-09	3.36191e-09	2419	tags=67%, list=15%, signal=57%	5692/5709/5685/5710/10213/5713/7314/5717/5700/5695/5682/5684/6500/5690/5687/9861/5688/5701/5691/10197/5704/5686/5683/5721/51684/5714/5689/7311/7979/7316/5693/5719/5702/9978/6233/5705/5694/5720	1:CTB	2
Whole PE	GO:0032527	protein exit from endoplasmic reticulum	40	0.574822	2.12875	2.07797e-05	0.00271791	0.00235305	2522	tags=52%, list=19%, signal=43%	55754/975/6400/9648/7353/23197/10952/55666/7415/55829/7184/81502/10113/9695/3638/51465/337867/9777/258010/84447/10956	10:Monocyte	1			Whole PE	hsa05204	Chemical carcinogenesis - DNA adducts	33	0.525815	1.9885	0.00046167	0.00939634	0.00708942	1361	tags=27%, list=9%, signal=25%	2052/4258/6817/6818/374875/4259/2941/2940/373156	4:CTB-2	1			Whole PE	R-HSA-9762114	GSK3B and BTRC:CUL1-mediated-degradation of NFE2L2	51	0.69428	2.43924	1.73965e-10	4.33058e-09	3.53058e-09	2419	tags=73%, list=15%, signal=62%	5692/5709/5685/5710/10213/5713/7314/5717/5700/5695/5682/5684/6500/5690/5687/9861/5688/5701/5691/10197/5704/5686/5683/5721/5714/5689/7311/7979/7316/5693/5719/5702/9978/6233/5705/5694/5720	1:CTB	2
Whole PE	GO:0031204	post-translational protein targeting to membrane, translocation	7	0.901162	2.1297	2.37987e-05	0.00301073	0.00260656	534	tags=71%, list=4%, signal=69%	23480/11231/29927/55176/10952	10:Monocyte	1			Whole PE	hsa04966	Collecting duct acid secretion	21	0.563498	1.95096	0.00106845	0.0184842	0.0139461	2528	tags=48%, list=16%, signal=40%	50617/527/10312/8992/9296/534/529/90423/9550/525	4:CTB-2	1			Whole PE	R-HSA-174154	APC/C:Cdc20 mediated degradation of Securin	65	0.6545	2.42882	1.97022e-10	4.84001e-09	3.94591e-09	2457	tags=62%, list=15%, signal=52%	5692/991/5709/5685/27338/5710/10213/5713/7314/5717/5700/5695/5682/5684/5690/5687/9861/5688/5701/5691/10197/5704/5686/5683/5721/5714/5689/7311/7979/7316/7324/5693/5719/5702/6233/11065/5705/5694/5720/246184	1:CTB	2
Whole PE	GO:0048259	regulation of receptor-mediated endocytosis	80	0.444211	1.95465	2.43626e-05	0.00303236	0.00262529	1477	tags=28%, list=11%, signal=25%	5291/967/3685/382/79890/10211/60682/1902/5879/302/27342/5898/8898/4289/867/84062/22943/344/341/22848/55697/6850	10:Monocyte	1			Whole PE	hsa03430	Mismatch repair	22	-0.662753	-1.71578	0.00126968	0.0191005	0.0144111	2530	tags=50%, list=16%, signal=42%	4436/5985/2956/6117/4292/9156/4437/10714/5983/5981/3978	4:CTB-2	1			Whole PE	R-HSA-8941858	Regulation of RUNX3 expression and activity	54	0.680762	2.43032	2.11338e-10	5.05855e-09	4.12408e-09	2419	tags=65%, list=15%, signal=55%	5692/5709/5685/5710/10213/5713/7314/5717/5700/5695/5682/5684/5690/5687/9861/5688/5701/5691/10197/5704/5686/5683/5721/5714/5689/7311/7979/7316/5693/5719/5702/6233/5705/5694/5720	1:CTB	2
Whole PE	GO:0033363	secretory granule organization	45	0.548983	2.10341	2.65211e-05	0.00324862	0.00281252	3419	tags=51%, list=25%, signal=38%	26985/2647/3267/89781/8546/7110/5990/84062/128637/3257/5270/19/5552/1385/23315/162/1130/8907/9519/25946/1176/8943/282991	10:Monocyte	1			Whole PE	hsa00980	Metabolism of xenobiotics by cytochrome P450	35	0.47731	1.84561	0.00149	0.0206216	0.0155588	1666	tags=29%, list=11%, signal=26%	2052/27294/4258/128/374875/4259/2941/2940/373156/8574	4:CTB-2	1			Whole PE	R-HSA-5387390	Hh mutants abrogate ligand secretion	55	0.678676	2.42455	2.09924e-10	5.05855e-09	4.12408e-09	2419	tags=65%, list=15%, signal=56%	5692/5709/5685/5710/10213/5713/7314/5717/5700/5695/5682/5684/5690/5687/9861/5688/5701/5691/10197/5704/5686/5683/5721/5714/5689/7311/7979/7316/5693/5719/5702/6233/5705/7415/5694/5720	1:CTB	2
Whole PE	GO:1901888	regulation of cell junction assembly	132	0.377499	1.76868	3.1609e-05	0.00381136	0.00329971	1747	tags=26%, list=13%, signal=23%	6281/5728/382/5795/2889/10211/387/5583/257194/79834/5879/23603/9475/7094/7097/2048/6385/6714/3987/1499/7474/23394/342184/5908/3553/22883/22943/9693/7248/1946/10507/8321/7070/5786	10:Monocyte	1			Whole PE	hsa04392	Hippo signaling pathway - multiple species	27	-0.627838	-1.68761	0.0014525	0.0206216	0.0155588	3991	tags=59%, list=26%, signal=44%	8994/60485/6788/23286/55233/9113/126374/84962/122786/25937/9770/10413/92597/166824/26524/7003	4:CTB-2	1			Whole PE	R-HSA-174084	Autodegradation of Cdh1 by Cdh1:APC/C	62	0.662418	2.41508	2.30655e-10	5.40323e-09	4.40508e-09	2457	tags=63%, list=15%, signal=54%	5692/5709/5685/27338/5710/10213/5713/7314/5717/5700/5695/5682/5684/5690/5687/9861/5688/5701/5691/10197/5704/5686/5683/5721/5714/5689/7311/7979/7316/7324/5693/5719/5702/6233/11065/5705/5694/5720/246184	1:CTB	2
Whole PE	GO:0002064	epithelial cell development	146	0.371812	1.78166	3.2166e-05	0.00381885	0.0033062	2653	tags=37%, list=20%, signal=30%	7431/2317/5872/2889/5339/5926/6494/9414/5916/2683/9475/639/207/83605/4233/10152/6714/7474/5908/3553/3552/26051/128637/23022/9693/118/8826/10116/80781/7716/59/3091/91663/4615/5175/1910/5962/2241/654/7132/25932/688/54507/9294/80173/10220/6093/122786/468/7855/2931/1874/56913/57111	10:Monocyte	1			Whole PE	hsa03083	Polycomb repressive complex	74	-0.496962	-1.55085	0.00185033	0.0220763	0.0166563	4711	tags=58%, list=30%, signal=41%	4149/221937/7528/84678/23429/3607/121536/114785/51460/23492/84108/10138/1387/84456/26053/11335/8726/5928/10238/54881/84333/23269/9212/6015/85015/80816/2033/10600/6045/648/22992/80012/2145/26147/22823/7027/84458/55252/57713/23512/2146/55777/22955	4:CTB-2	1			Whole PE	R-HSA-174178	APC/C:Cdh1 mediated degradation of Cdc20 and other APC/C:Cdh1 targeted proteins in late mitosis/early G1	71	0.632296	2.37271	2.31525e-10	5.40323e-09	4.40508e-09	2457	tags=58%, list=15%, signal=49%	5692/991/5709/5685/27338/5710/10213/5713/7314/9212/5717/5700/5695/5682/5684/5690/5687/9861/5688/5701/5691/10197/5704/5686/5683/5721/5714/5689/7311/7979/7316/7324/5693/5719/5702/6233/11065/5705/5694/5720/246184	1:CTB	2
Whole PE	GO:0042270	protection from natural killer cell mediated cytotoxicity	5	0.939665	1.96162	4.50319e-05	0.00503639	0.0043603	620	tags=80%, list=5%, signal=76%	3105/3133/5272/3106	10:Monocyte	1			Whole PE	hsa05170	Human immunodeficiency virus 1 infection	176	-0.432947	-1.43134	0.00166927	0.0220763	0.0166563	4098	tags=43%, list=26%, signal=32%	6199/60489/2790/140564/164668/915/4893/3134/6198/6890/85363/917/5579/805/5829/920/1642/51135/808/164/581/995/916/7124/9730/2792/2475/1147/3265/54331/5534/27350/25939/7465/4775/5532/545/10000/5335/5594/7133/5291/6891/8454/355/130340/5295/2776/5062/1432/5290/472/836/29110/5599/7188/5608/8945/5601/983/6885/59345/5894/2786/3845/5533/5747/596/2770/23118/23291/1111/5336/4773/8065/5530	4:CTB-2	1			Whole PE	R-HSA-5610785	GLI3 is processed to GLI3R by the proteasome	57	0.662705	2.38533	3.40785e-10	7.85489e-09	6.40384e-09	2419	tags=67%, list=15%, signal=57%	5692/5709/5685/5710/10213/5713/7314/5717/5700/5695/5682/5684/6500/5690/5687/9861/5688/5701/5691/10197/5704/5686/5683/5721/51684/5714/5689/7311/7979/7316/5693/5719/5702/9978/6233/5705/5694/5720	1:CTB	2
Whole PE	GO:0150115	cell-substrate junction organization	86	0.426228	1.89413	4.93095e-05	0.00543602	0.00470628	1747	tags=27%, list=13%, signal=23%	6281/5728/382/613/5795/387/5339/51762/79834/5879/23603/9475/7094/3915/6385/6714/3987/342184/3678/7248/1946/7070/5786	10:Monocyte	1			Whole PE	hsa04340	Hedgehog signaling pathway	50	-0.541084	-1.60307	0.00221973	0.024775	0.0186924	2826	tags=52%, list=18%, signal=43%	132884/8405/8452/11127/23295/339745/2121/64750/1456/409/2737/57154/1452/53944/8454/91653/4036/2932/2619/8945/84976/5727/55733/5567/596/23291	4:CTB-2	1			Whole PE	R-HSA-5658442	Regulation of RAS by GAPs	66	0.638604	2.36226	3.50471e-10	7.97963e-09	6.50554e-09	2419	tags=59%, list=15%, signal=51%	5692/5709/5685/5710/10213/5713/7314/5717/5700/5695/5682/5684/5690/399473/5687/9861/5688/153090/5701/5691/10197/5704/5686/5683/5721/5714/5689/7311/7979/7316/5693/5719/5702/9978/6233/5705/200734/5694/5720	1:CTB	2
Whole PE	GO:0034330	cell junction organization	480	0.261652	1.46522	5.42269e-05	0.0058227	0.00504105	1853	tags=20%, list=14%, signal=18%	54434/6281/5728/4763/3688/382/23085/5872/55619/26115/613/5795/2889/10211/387/5583/1495/23607/5339/51762/257194/23136/79834/58504/5978/5879/8828/23603/9414/9948/9475/23654/7094/7097/348/7040/203068/8898/207/3915/7042/2048/3684/50807/83605/6385/7415/10152/6714/3987/1499/84062/6780/7474/28988/23184/23394/342184/5908/3553/10497/22883/27020/3678/2213/22943/4092/79778/1364/6801/6259/9693/118/51201/7248…	10:Monocyte	1			Whole PE	hsa04012	ErbB signaling pathway	76	-0.496087	-1.55201	0.0028592	0.0300969	0.0227077	2039	tags=38%, list=13%, signal=33%	8440/2475/3265/10000/5335/5594/6777/5291/673/1978/5295/2549/5062/2932/5290/1026/5599/818/6654/5601/1956/5894/2066/3845/5747/6416/867/5336/1027	4:CTB-2	1			Whole PE	R-HSA-5610783	Degradation of GLI2 by the proteasome	57	0.662327	2.38396	3.59206e-10	8.07997e-09	6.58734e-09	2419	tags=67%, list=15%, signal=57%	5692/5709/5685/5710/10213/5713/7314/5717/5700/5695/5682/5684/6500/5690/5687/9861/5688/5701/5691/10197/5704/5686/5683/5721/51684/5714/5689/7311/7979/7316/5693/5719/5702/9978/6233/5705/5694/5720	1:CTB	2
Whole PE	GO:0007160	cell-matrix adhesion	178	0.340692	1.69078	5.6374e-05	0.00595943	0.00515942	1480	tags=20%, list=11%, signal=18%	5291/967/6281/960/5728/4763/3688/3685/613/5795/387/79834/5879/23603/9475/7094/6237/54453/3611/4289/3684/6385/6714/3987/1499/342184/83706/3696/10519/5328/3678/10894/7248/1605/1946	10:Monocyte	1			Whole PE	hsa05235	PD-L1 expression and PD-1 checkpoint pathway in cancer	83	-0.477977	-1.50825	0.00358956	0.0344996	0.0260295	4098	tags=46%, list=26%, signal=34%	6199/940/10538/915/4893/6198/917/920/3459/916/3932/4215/2475/1147/3265/5534/1459/4775/5532/10000/5335/5594/5291/5781/5295/27436/3091/3717/1432/5290/5608/1956/5894/3845/5533/4773/5728/5530	4:CTB-2	1			Whole PE	R-HSA-187577	SCF(Skp2)-mediated degradation of p27/p21	57	0.660095	2.37593	4.20607e-10	9.34849e-09	7.62153e-09	2419	tags=67%, list=15%, signal=57%	5692/5709/5685/5710/10213/5713/7314/5717/5700/5695/5682/5684/6500/5690/5687/9861/5688/5701/5691/10197/5704/5686/5683/5721/5714/5689/7311/7979/7316/5693/5719/5702/6233/5705/9134/5694/890/5720	1:CTB	2
Whole PE	GO:0090084	negative regulation of inclusion body assembly	10	-0.823856	-1.98164	5.79735e-05	0.00604569	0.00523411	104	tags=50%, list=1%, signal=50%	10049/3303/55466/3304/3337	10:Monocyte	1			Whole PE	hsa01524	Platinum drug resistance	65	-0.497514	-1.51903	0.00460798	0.039859	0.0300731	2530	tags=38%, list=16%, signal=32%	4436/7153/2956/1029/329/2948/317/10000/5594/5291/355/5295/4292/5290/7155/472/332/836/672/1026/4437/5980/596/5429/4217	4:CTB-2	1			Whole PE	R-HSA-5687128	MAPK6/MAPK4 signaling	85	0.600105	2.33561	6.2153e-10	1.36517e-08	1.11298e-08	2907	tags=56%, list=18%, signal=47%	5879/5692/3315/5709/5685/5710/10213/5713/7314/5717/5700/5695/26523/5682/10602/5684/998/5690/5687/9861/5688/5701/5691/10197/5704/5686/5683/5721/2118/5714/5689/7311/7979/7316/4609/10642/3337/5693/5719/5702/6233/5705/5694/8997/5720/983/5706/5896	1:CTB	2
Whole PE	GO:1900034	regulation of cellular response to heat	15	-0.759897	-2.05789	6.87481e-05	0.00702912	0.00608551	751	tags=67%, list=6%, signal=63%	23411/1387/545/7266/2475/472/10049/51278/3337/26973	10:Monocyte	1			Whole PE	hsa04919	Thyroid hormone signaling pathway	107	-0.458833	-1.47324	0.00457663	0.039859	0.0300731	4778	tags=44%, list=31%, signal=31%	652/9442/5604/488/4193/113026/1733/1827/7067/4893/7249/5469/1387/5579/29079/51196/5170/5214/8841/2475/3265/9611/10000/5335/5594/5291/2033/9440/8648/4851/5295/2099/3091/2932/5290/23389/9969/25942/5894/7068/1499/3845/10499/5567/5336/8850/116931	4:CTB-2	1			Whole PE	R-HSA-69541	Stabilization of p53	55	0.666277	2.38026	8.97528e-10	1.92607e-08	1.57027e-08	2419	tags=64%, list=15%, signal=54%	5692/5709/5685/5710/10213/5713/7314/5717/5700/5695/5682/5684/5690/5687/9861/5688/5701/5691/10197/5704/5686/5683/5721/5714/5689/7311/7979/7316/5693/5719/5702/6233/5705/5694/5720	1:CTB	2
Whole PE	GO:0006753	nucleoside phosphate metabolic process	410	-0.327094	-1.53716	6.92255e-05	0.00702912	0.00608551	3129	tags=33%, list=23%, signal=26%	4708/5144/10965/4713/23057/27284/84188/84836/10005/516/130752/27115/4726/471/1841/6391/9605/525/79661/54956/3418/8034/2181/64087/3704/11315/4200/514/109/2639/136332/1723/4191/79877/506/11001/51024/8876/4701/4710/7372/7084/515/2773/2330/196883/51292/55902/4725/6296/526/50808/498/5471/65018/785/349565/55811/2272/31/55191/79621/2618/5198/1716/8622/23171/54995/65220/4704/25939/3620/9551/64834/5164/34…	10:Monocyte	1			Whole PE	hsa05222	Small cell lung cancer	86	-0.467142	-1.47872	0.00507694	0.0418243	0.0315559	2792	tags=34%, list=18%, signal=28%	284217/1147/1284/329/9134/1017/317/10000/1021/5291/5925/1643/5295/3912/51426/3915/1871/3655/5290/836/1026/7188/6502/5747/596/3688/2272/5728/1027	4:CTB-2	1			Whole PE	R-HSA-9013694	Signaling by NOTCH4	80	0.609272	2.33606	9.24747e-10	1.96194e-08	1.5995e-08	2419	tags=54%, list=15%, signal=46%	5692/54567/5709/5685/10460/5710/10213/5713/7314/5717/3280/5700/5695/5682/5684/6500/5690/5687/9861/5688/23493/5701/5691/10197/5704/5686/23462/5683/5721/5714/5689/7311/7979/7316/5693/5719/5702/9978/6233/5705/2648/5694/5720	1:CTB	2
Whole PE	GO:0003376	sphingosine-1-phosphate receptor signaling pathway	12	0.801432	2.21773	7.53492e-05	0.00753707	0.00652528	655	tags=33%, list=5%, signal=32%	5291/8877/5879/207	10:Monocyte	1			Whole PE	hsa00310	Lysine degradation	59	-0.50704	-1.53619	0.00574721	0.0451939	0.0340983	3455	tags=39%, list=22%, signal=30%	54904/56950/10919/79823/387893/93166/1962/55526/4297/9869/501/64754/64324/79813/2145/58508/3030/2146/84787/29072/55870/7468/10157	4:CTB-2	1			Whole PE	R-HSA-4641257	Degradation of AXIN	53	0.666758	2.36359	1.26245e-09	2.64831e-08	2.15908e-08	2419	tags=66%, list=15%, signal=56%	5692/5709/5685/5710/10213/5713/7314/5717/5700/5695/5682/5684/5690/5687/9861/5688/5701/5691/10197/5704/5686/5683/5721/5714/5689/7311/7979/7316/5693/5719/5702/6233/5705/5694/5720	1:CTB	2
Whole PE	GO:0070202	regulation of establishment of protein localization to chromosome	11	-0.806556	-1.99969	7.7158e-05	0.00753707	0.00652528	1144	tags=64%, list=8%, signal=58%	10574/23514/908/10576/7203/10575/6950	10:Monocyte	1			EOPE	hsa05171	Coronavirus disease - COVID-19	165	0.560694	2.72009	1e-10	1.18e-08	9.19298e-09	1548	tags=50%, list=12%, signal=44%	4938/51065/9636/4940/6231/5610/4599/1437/6223/9349/4736/6132/6156/6144/6206/6233/6227/6146/11224/6141/6165/2197/6133/6201/7297/6230/6232/6154/6169/10379/6171/6235/6209/6130/6207/6222/6168/6152/6139/6143/9045/6188/6128/5601/6181/6204/6203/25873/6205/6136/6850/6166/6202/6210/6122/6161/6228/6135/6147/7311/6193/6217/6229/6129/51121/6167/6234/6159/6194/3921/6176/6142/6138/6155/6125/6218/2353/103/6158/…	2:NK-cell	3			Whole PE	R-HSA-5668541	TNFR2 non-canonical NF-kB pathway	91	0.571919	2.24526	1.51716e-09	3.14726e-08	2.56586e-08	2856	tags=48%, list=18%, signal=40%	5692/4055/8744/5709/5685/5710/10213/7132/5713/7314/5717/5700/5695/5682/5684/6500/5690/5687/9861/5688/5701/5691/330/10197/5704/5686/5683/5721/8742/5714/5689/7311/7979/7316/5693/5719/5702/6233/5705/5694/5720/7133/9966/5706	1:CTB	2
Whole PE	GO:0010833	telomere maintenance via telomere lengthening	74	-0.487919	-1.8733	8.8734e-05	0.00835074	0.00722972	3419	tags=50%, list=25%, signal=38%	5588/79618/10694/22948/7520/26272/2072/5888/84464/9894/85456/55226/100134934/54386/3178/8550/170506/545/3181/10111/79991/3192/548593/10574/55651/64858/908/5981/10728/64282/10576/472/7203/3320/3326/10575/6950	10:Monocyte	1			EOPE	hsa00190	Oxidative phosphorylation	104	0.598914	2.69415	1e-10	1.18e-08	9.19298e-09	2313	tags=49%, list=18%, signal=40%	10975/126328/514/1350/4697/533/1339/10476/4696/1347/4713/10632/9377/4726/4725/1351/155066/51079/9167/517/4718/522/1337/506/27089/4700/29796/509/7388/516/8992/4709/4716/4715/539/1345/5464/9296/518/513/4695/534/4702/1340/1327/1353/4712/521/51606/245973/4728	2:NK-cell	3			Whole PE	R-HSA-68949	Orc1 removal from chromatin	68	0.623665	2.3195	1.65777e-09	3.40116e-08	2.77286e-08	2419	tags=56%, list=15%, signal=48%	5692/5709/5685/5710/10213/5713/7314/5717/5700/5695/5682/5684/6500/5690/5687/9861/5688/5701/5691/10197/5704/5686/5683/5721/5714/5689/7311/7979/7316/5693/5719/5702/9978/6233/5705/5694/890/5720	1:CTB	2
Whole PE	GO:0090077	foam cell differentiation	29	0.598912	2.04294	0.000102078	0.00949078	0.00821672	2344	tags=52%, list=17%, signal=43%	3685/23461/5583/7040/3606/4790/7474/19/4481/5465/6772/247/1071/5468/2033	10:Monocyte	1			EOPE	hsa05012	Parkinson disease	205	0.422127	2.12109	1.05073e-09	9.29893e-08	7.24448e-08	1322	tags=27%, list=10%, signal=25%	10975/126328/514/1350/64837/4697/1339/10476/4696/581/1347/4713/9377/6233/7295/4726/4725/1351/5689/51079/9167/27173/517/4718/522/5601/10213/1337/51465/506/5719/27089/4700/29796/7311/5691/509/7388/516/4709/4716/57181/5705/4715/1965/65018/539/1345/5704/2771/5688/7280/518/513/6622/4695	2:NK-cell	3			Whole PE	R-HSA-5619084	ABC transporter disorders	72	0.602423	2.27872	4.399e-09	8.83111e-08	7.19972e-08	2652	tags=56%, list=16%, signal=47%	5692/5709/5685/5710/10213/5713/7314/5717/5700/5695/5682/5684/5690/5687/9861/5688/5701/5691/10197/5704/5686/5683/5721/5714/5689/7311/7979/7316/5693/5719/5702/6233/79139/5705/26154/7415/5694/5720/6048/1244	1:CTB	2
Whole PE	GO:0043542	endothelial cell migration	167	0.337733	1.6662	0.000105321	0.00956188	0.00827828	1115	tags=20%, list=8%, signal=19%	5291/9839/1545/4763/3688/5797/2896/5872/2260/387/9404/6672/5879/8828/5025/22846/8613/9475/6237/10000/348/7040/811/54453/207/6868/4233/10755/7474/23598/28984/161742/10519/2821	10:Monocyte	1			EOPE	hsa05415	Diabetic cardiomyopathy	153	0.41931	2.00143	1.2617e-07	8.93282e-06	6.95926e-06	1322	tags=29%, list=10%, signal=27%	10975/126328/514/1350/4697/1339/10476/4696/9882/6667/1347/4713/9377/4726/4725/1351/5580/51079/9167/517/4718/522/5601/1337/506/177/27089/4700/142/29796/509/7388/516/4709/4716/5499/4715/539/1345/1509/518/5162/5524/513/4695	2:NK-cell	3			Whole PE	R-HSA-9793380	Formation of paraxial mesoderm	64	0.625226	2.31092	5.72783e-09	1.13764e-07	9.27485e-08	2430	tags=56%, list=15%, signal=48%	5692/5709/5685/5710/10213/5713/5717/5700/5695/5682/5684/5690/5687/9861/2043/5688/5701/5691/10197/5704/5686/5683/5721/5714/5689/7979/5693/5719/5702/3955/5705/2648/5694/84667/5720/6911	1:CTB	2
Whole PE	GO:0010742	macrophage derived foam cell differentiation	28	0.606267	2.06588	0.000111895	0.00975843	0.00844843	2344	tags=54%, list=17%, signal=44%	3685/23461/5583/7040/3606/4790/7474/19/4481/5465/6772/247/1071/5468/2033	10:Monocyte	1			EOPE	hsa05016	Huntington disease	233	0.366554	1.87239	3.14501e-07	1.85555e-05	1.4456e-05	1322	tags=24%, list=10%, signal=22%	10975/126328/514/1350/64837/4697/1339/10476/4696/581/127602/6506/1175/6667/1347/4713/9377/4726/4725/1351/1173/5689/51079/9167/517/8678/4718/522/5601/10213/1337/506/5719/27089/4700/7186/29796/5691/509/7388/516/4709/1768/4716/5441/5705/4715/160/539/1345/5704/5688/7280/518/513/4695	2:NK-cell	3			Whole PE	R-HSA-5676590	NIK-->noncanonical NF-kB signaling	57	0.637555	2.2948	5.86166e-09	1.15197e-07	9.39165e-08	2419	tags=63%, list=15%, signal=54%	5692/5709/5685/5710/10213/5713/7314/5717/5700/5695/5682/5684/6500/5690/5687/9861/5688/5701/5691/10197/5704/5686/5683/5721/5714/5689/7311/7979/7316/5693/5719/5702/6233/5705/5694/5720	1:CTB	2
Whole PE	GO:1904874	positive regulation of telomerase RNA localization to Cajal body	14	-0.752804	-2.00198	0.000124138	0.00975843	0.00844843	1818	tags=57%, list=13%, signal=50%	10856/10574/55651/908/10576/7203/10575/6950	10:Monocyte	1			EOPE	hsa05010	Alzheimer disease	288	0.321449	1.68233	2.80866e-06	0.000124283	9.68247e-05	1322	tags=21%, list=10%, signal=19%	10975/5610/126328/514/1350/64837/4697/1339/10476/4696/1347/4713/9377/4726/4725/1351/4040/5689/51079/9167/27173/517/8678/5743/4718/1131/522/5601/10213/1337/1020/506/5719/177/27089/4700/7186/29796/5691/509/5530/7388/516/4709/4716/57181/5705/4715/1965/4893/539/1345/5704/1133/5688/7280/518/513/6622/4695	2:NK-cell	3			Whole PE	R-HSA-69563	p53-Dependent G1 DNA Damage Response	63	0.625514	2.29445	7.75686e-09	1.44821e-07	1.18068e-07	2419	tags=59%, list=15%, signal=50%	5692/5709/5685/5710/10213/5713/7314/5717/5700/5695/5682/5684/5690/5687/9861/5688/5701/5691/10197/5704/5686/5683/5721/5714/5689/7311/7979/7316/5693/5719/5702/6233/5705/9134/5694/890/5720	1:CTB	2
Whole PE	GO:1904814	regulation of protein localization to chromosome, telomeric region	11	-0.794463	-1.9697	0.000119791	0.00975843	0.00844843	1144	tags=55%, list=8%, signal=50%	10574/908/10576/7203/10575/6950	10:Monocyte	1			EOPE	hsa05022	Pathways of neurodegeneration - multiple diseases	345	0.306381	1.63234	3.62537e-06	0.000142598	0.000111093	2037	tags=26%, list=16%, signal=22%	10975/126328/514/1350/64837/4697/1339/356/10476/4696/581/127602/1347/4713/9377/6233/4726/4725/1351/4040/5689/51079/9167/517/596/8678/5743/203228/4718/1131/522/5601/10213/1337/5621/51465/1020/506/5719/177/27089/4700/7186/29796/7222/7311/5691/509/5530/7388/516/4709/1768/4716/5705/4715/1965/4893/9896/65018/539/1345/5704/1133/5688/7280/518/513/6622/4695/578/6804/847/643246/637/801/4702/3092/1340/1327…	2:NK-cell	3			Whole PE	R-HSA-69580	p53-Dependent G1/S DNA damage checkpoint	63	0.625514	2.29445	7.75686e-09	1.44821e-07	1.18068e-07	2419	tags=59%, list=15%, signal=50%	5692/5709/5685/5710/10213/5713/7314/5717/5700/5695/5682/5684/5690/5687/9861/5688/5701/5691/10197/5704/5686/5683/5721/5714/5689/7311/7979/7316/5693/5719/5702/6233/5705/9134/5694/890/5720	1:CTB	2
Whole PE	GO:0048708	astrocyte differentiation	59	0.479694	1.95829	0.000119092	0.00975843	0.00844843	1622	tags=31%, list=12%, signal=27%	9839/7431/4763/2896/8613/2908/3569/3845/7099/3398/4035/51542/3553/5270/135/274/9682/5594	10:Monocyte	1			EOPE	hsa05014	Amyotrophic lateral sclerosis	285	0.321679	1.67978	6.28864e-06	0.000222618	0.000173434	2037	tags=28%, list=16%, signal=24%	10975/400916/126328/514/1350/64837/4697/1339/10476/4696/581/127602/6506/1347/4713/9377/4726/4725/1351/5689/51079/9167/517/596/8678/203228/4718/522/10213/1337/506/29107/310/5719/27089/4700/7186/55746/29796/5691/509/5530/7388/516/4709/1768/4716/5705/4715/1965/9896/60/65018/539/1345/5704/5688/311/7280/518/53371/5216/513/4695/847/643246/637/23636/4702/1340/79023/1327/11258/7416/4712/5686/3710/29982/8…	2:NK-cell	3			Whole PE	R-HSA-5607761	Dectin-1 mediated noncanonical NF-kB signaling	58	0.628975	2.26624	2.05046e-08	3.69958e-07	3.01615e-07	2419	tags=62%, list=15%, signal=53%	5692/5709/5685/5710/10213/5713/7314/5717/5700/5695/5682/5684/6500/5690/5687/9861/5688/5701/5691/10197/5704/5686/5683/5721/5714/5689/7311/7979/7316/5693/5719/5702/6233/5705/5694/5720	1:CTB	2
Whole PE	GO:1904869	regulation of protein localization to Cajal body	10	-0.810986	-1.95068	0.000124098	0.00975843	0.00844843	1432	tags=70%, list=11%, signal=63%	51574/10574/908/10576/7203/10575/6950	10:Monocyte	1			EOPE	hsa04714	Thermogenesis	182	0.351131	1.74294	1.90171e-05	0.000561003	0.000437059	2253	tags=31%, list=18%, signal=26%	10975/126328/514/1350/4697/1339/10476/4696/1347/4713/10632/9377/4726/6598/4725/1351/51079/9167/517/4718/109/522/1337/506/8110/27089/4700/29796/509/7388/516/4709/4716/4715/6194/4893/60/539/1345/518/513/4695/3991/4702/86/23305/1340/1327/84335/1353/4712/6196/6605/521/51287/5562/2885	2:NK-cell	3			Whole PE	R-HSA-5632684	Hedgehog 'on' state	81	0.567591	2.18643	3.69842e-08	6.5141e-07	5.31074e-07	2419	tags=47%, list=15%, signal=40%	5692/5709/5685/5710/10213/5713/7314/5717/408/5700/5695/5682/5684/5690/5687/9861/5688/5701/5691/10197/5704/5686/5683/5721/51684/5714/5689/7311/7979/7316/5693/5719/5702/9978/6233/5705/5694/5720	1:CTB	2
Whole PE	GO:1904871	positive regulation of protein localization to Cajal body	10	-0.810986	-1.95068	0.000124098	0.00975843	0.00844843	1432	tags=70%, list=11%, signal=63%	51574/10574/908/10576/7203/10575/6950	10:Monocyte	1			EOPE	hsa04660	T cell receptor signaling pathway	107	-0.438611	-1.843	5.89873e-05	0.00130614	0.00101757	2957	tags=42%, list=23%, signal=33%	5599/5296/5777/5523/3932/3725/5595/3551/4793/2932/4794/4792/9402/5788/27040/208/5529/5519/5520/8440/5609/5781/925/5894/7535/919/5133/5588/8915/4772/5603/6885/2534/868/55844/5533/5290/3458/9020/5527/915/926/940/917/4773	2:NK-cell	3			Whole PE	R-HSA-9759194	Nuclear events mediated by NFE2L2	93	0.541204	2.13487	4.96863e-08	8.58929e-07	7.00258e-07	2449	tags=49%, list=15%, signal=42%	5692/5709/5685/5710/7295/10213/6888/5713/7314/5717/3162/374/5052/5700/5695/10061/5682/5684/6500/5690/5687/9861/5688/8878/5701/5691/10197/5704/5686/5683/5721/5714/5689/7311/7979/7316/4609/5693/5719/5702/9978/6233/5705/5694/5720/2940	1:CTB	2
Whole PE	GO:0034763	negative regulation of transmembrane transport	81	0.425335	1.88077	0.000117524	0.00975843	0.00844843	2600	tags=40%, list=19%, signal=32%	5311/9446/7009/23327/8682/91404/7531/124935/51719/207/2048/7416/55829/4946/5530/55917/3553/5533/2171/55022/274/4923/4947/808/5532/7779/2859/2887/817/3952/9943/2931	10:Monocyte	1			EOPE	hsa05208	Chemical carcinogenesis - reactive oxygen species	167	0.345255	1.68633	5.90348e-05	0.00130614	0.00101757	1322	tags=26%, list=10%, signal=23%	10975/126328/514/1350/4697/1339/10476/4696/1347/4713/9377/4726/4725/1351/5580/51079/9167/4259/517/4718/522/5601/1337/506/27089/4700/29796/509/7388/516/4709/3162/4716/873/4715/5170/4893/539/1345/2353/518/513/4695	2:NK-cell	3			Whole PE	R-HSA-8939902	Regulation of RUNX2 expression and activity	69	0.585016	2.18128	7.51227e-08	1.27504e-06	1.0395e-06	2927	tags=58%, list=18%, signal=48%	5692/5709/5685/5710/10213/5713/7314/5717/5700/5695/5682/5684/6500/5690/5687/9861/5688/5701/5691/10197/5704/5686/5683/5721/5714/5689/7311/7979/7316/5693/5719/5702/9978/6233/5705/5694/5720/1749/5706/10891	1:CTB	2
Whole PE	GO:0007044	cell-substrate junction assembly	79	0.424874	1.87077	0.000117832	0.00975843	0.00844843	1747	tags=27%, list=13%, signal=23%	6281/5728/613/5795/387/5339/79834/5879/23603/9475/7094/3915/6385/6714/3987/342184/3678/7248/1946/7070/5786	10:Monocyte	1			EOPE	hsa04668	TNF signaling pathway	100	-0.414873	-1.71505	0.000517106	0.00732222	0.0057045	2957	tags=37%, list=23%, signal=29%	5599/5296/836/3725/5595/3551/6364/843/3383/4792/1540/7185/7128/9021/208/6352/182/3600/7133/153090/5609/6868/8837/7132/79651/9586/3659/4217/7412/5603/6885/8809/83737/5290/1385/7187/9020	2:NK-cell	3			Whole PE	R-HSA-1428517	The citric acid (TCA) cycle and respiratory electron transport	156	0.465624	1.96465	7.92653e-08	1.33323e-06	1.08694e-06	4850	tags=60%, list=30%, signal=43%	9123/3939/91942/515/55967/4725/2739/4718/4696/7388/7381/10476/9551/81889/55744/51103/509/521/51295/6341/1340/5166/4700/54704/539/9997/27089/54205/29078/4191/514/51079/4712/3419/4715/9377/4710/4728/516/7416/10131/10632/7385/4709/4731/1329/6834/4697/1327/7351/10975/29796/1350/518/4704/4717/6392/4722/9167/4720/7350/4726/682/4706/4702/4701/6256/1351/4695/25880/51241/2109/2108/1337/522/517/4708/51300/…	1:CTB	2
Whole PE	GO:0006163	purine nucleotide metabolic process	353	-0.335182	-1.55969	0.000116791	0.00975843	0.00844843	3129	tags=34%, list=23%, signal=27%	4708/5144/10965/4713/23057/27284/84188/84836/10005/516/130752/27115/4726/471/6391/9605/525/54956/3418/8034/2181/64087/3704/4200/514/109/2639/136332/4191/79877/506/11001/51024/8876/4701/4710/515/2773/2330/196883/51292/55902/4725/6296/526/50808/498/5471/65018/785/349565/55811/2272/31/55191/2618/5198/1716/8622/23171/54995/65220/4704/25939/3620/9551/64834/5164/3417/10591/4830/8801/32/522/51071/4717/4…	10:Monocyte	1			EOPE	hsa04081	Hormone signaling	88	-0.400027	-1.61712	0.00257017	0.0252733	0.0196896	1682	tags=25%, list=13%, signal=22%	6774/5592/1442/6794/2057/7067/3685/2778/6776/10672/7434/1081/2782/5330/5290/6777/8660/115/79602/3480/154/54331	2:NK-cell	3			Whole PE	R-HSA-1169091	Activation of NF-kappaB in B cells	64	0.598629	2.21261	1.01458e-07	1.6763e-06	1.36663e-06	2992	tags=66%, list=18%, signal=54%	5692/5709/5685/5710/10213/5713/7314/5717/5700/5695/5966/5682/5684/6500/5690/5687/9861/5688/4793/5701/5691/10197/5704/5686/4794/5683/5721/5714/5689/7311/7979/7316/5693/5719/5702/6233/5705/5694/5720/5579/5706/84433	1:CTB	2
Whole PE	GO:0055086	nucleobase-containing small molecule metabolic process	465	-0.313549	-1.48899	0.000122329	0.00975843	0.00844843	3129	tags=32%, list=23%, signal=26%	4708/5144/10965/4713/23057/27284/84188/84836/10005/516/130752/27115/4726/471/1841/6391/9605/525/79661/2135/54956/3418/8034/56952/2181/200315/64087/3704/11315/4200/514/109/2639/136332/1723/2745/4191/79877/506/4329/11001/51024/8876/7360/4701/4710/7372/7084/515/2773/2330/196883/2530/51292/60489/55902/4725/6296/526/50808/498/5471/65018/785/349565/55811/2272/31/55191/9582/79621/2618/5198/1716/8622/231…	10:Monocyte	1			EOPE	hsa04064	NF-kappa B signaling pathway	81	-0.396737	-1.59213	0.0049626	0.0379244	0.0295456	2275	tags=31%, list=18%, signal=25%	3383/4792/1540/7185/27040/7128/51135/114609/8837/7132/7535/472/929/5588/6351/8915/7412/6885/597/7187/9020/9560/5971/4067/5579	2:NK-cell	3			Whole PE	R-HSA-195253	Degradation of beta-catenin by the destruction complex	80	0.567694	2.17665	1.09873e-07	1.76839e-06	1.44171e-06	2419	tags=51%, list=15%, signal=44%	166/5692/5709/5685/5518/5710/10213/5713/7314/5717/7090/5700/5695/5682/5684/6500/5690/5687/9861/5688/5701/5691/10197/5704/5686/5683/5721/5714/5689/7311/7979/7316/5693/5719/5702/9978/6233/5705/7089/5694/5720	1:CTB	2
Whole PE	GO:1902532	negative regulation of intracellular signal transduction	428	0.266466	1.46335	0.000134442	0.0103749	0.00898215	1937	tags=23%, list=14%, signal=20%	5291/117584/960/5728/4763/3688/4282/10318/5795/3622/51094/57007/7009/23607/9447/5598/55870/5494/1848/6648/55031/4193/1902/154743/2023/83667/23028/5495/27342/5970/399/64116/7099/29110/114548/348/2907/11006/207/7042/2048/4035/140885/5922/4233/55829/6714/1499/7088/599/171392/84270/23625/4067/50484/161742/3553/4221/23005/2203/7126/10519/55654/79109/7337/4976/286827/4092/83892/25793/10488/23239/7248/1…	10:Monocyte	1			EOPE	hsa05417	Lipid and atherosclerosis	163	-0.3282	-1.46171	0.00708674	0.0491903	0.0383225	2629	tags=31%, list=21%, signal=25%	5595/3551/3717/5452/2932/3329/3383/4792/3305/3310/3949/23236/805/51135/3303/29110/208/6352/114609/6774/114548/3320/4780/5609/6348/7132/3326/1649/54205/929/5578/4772/4217/9138/7412/1535/5603/6885/142678/3306/5747/5330/5533/5908/5290/10010/7187/2081/6349/4067/4773	2:NK-cell	3			Whole PE	R-HSA-2467813	Separation of Sister Chromatids	173	0.457456	1.9469	1.09493e-07	1.76839e-06	1.44171e-06	4003	tags=51%, list=25%, signal=39%	7277/5692/7280/991/5709/5685/10381/27338/5518/5710/10213/5713/7314/9212/5717/8655/5700/5695/5682/81929/11004/64946/1058/1063/55839/5684/5690/332/5687/9861/5688/5701/5691/10197/5704/84790/5686/5683/5721/7846/10726/64105/5714/5689/7311/7979/10383/7316/83540/7324/79023/5693/5719/5702/6233/55143/11065/147841/5705/1781/4085/5905/701/6232/5694/5720/246184/1062/5706/5516/51529/9232/10376/81930/25906/113…	1:CTB	2
Whole PE	GO:0010631	epithelial cell migration	234	0.303717	1.56463	0.000138962	0.0106175	0.00919219	1166	tags=19%, list=9%, signal=17%	5291/9839/5728/1545/4763/3688/5797/382/2896/5872/2260/51094/387/9404/6672/5879/8828/23603/5025/22846/8613/9475/6237/10000/7048/348/7040/811/54453/207/7042/6868/4233/10755/6714/7474/23598/57142/28984/161742/10519/2821/394/659	10:Monocyte	1			EOPE	hsa00190	Oxidative phosphorylation	105	-0.514351	-2.35638	6.88247e-10	2.42951e-07	1.85464e-07	3123	tags=55%, list=25%, signal=42%	1340/518/9167/7384/4724/4716/4722/5464/1346/7381/7388/90423/4713/4706/1347/4701/4714/4700/9114/9551/4728/27089/526/4709/4707/506/10476/10975/498/4698/4708/51079/4726/51382/527/1345/4723/4711/522/9550/126328/4729/4696/4718/521/4702/6390/516/55967/1337/10063/341947/170712/513/8992/4717/6389/1537	5:EVT	3			Whole PE	R-HSA-382556	ABC-family proteins mediated transport	94	0.528878	2.08645	1.28299e-07	2.04731e-06	1.6691e-06	2652	tags=51%, list=16%, signal=43%	5692/20/24/5709/5685/5710/10213/5713/7314/8894/5717/23457/5700/5695/5682/5684/5690/5687/9861/5688/5701/5691/10197/5704/5686/5683/5721/10347/9619/5714/5689/7311/7979/7316/5693/5719/23/5702/6233/79139/5705/26154/7415/5694/5720/10257/6048/1244	1:CTB	2
Whole PE	GO:0090132	epithelium migration	235	0.301166	1.54847	0.000149349	0.0112993	0.00978243	1166	tags=19%, list=9%, signal=17%	5291/9839/5728/1545/4763/3688/5797/382/2896/5872/2260/51094/387/9404/6672/5879/8828/23603/5025/22846/8613/9475/6237/10000/7048/348/7040/811/54453/207/7042/6868/4233/10755/6714/7474/23598/57142/28984/161742/10519/2821/394/659	10:Monocyte	1			EOPE	hsa05016	Huntington disease	237	-0.36753	-1.91402	5.96997e-08	1.0537e-05	8.04375e-06	3434	tags=49%, list=27%, signal=36%	3799/6392/5700/5715/161/1327/5719/5441/2776/10213/5686/1340/518/9167/9706/8701/7384/5437/4724/5707/4716/4722/5435/4899/1212/1770/7417/5692/1346/5433/7381/7388/1173/5440/4713/4706/5438/1347/11258/4701/4714/4700/55860/4728/7979/6507/27089/4709/5439/4707/506/7157/10476/10975/3064/10121/498/84790/4698/4708/51079/10120/4726/163/581/1345/4723/5710/6667/10376/55062/203068/5432/4711/5683/5693/5434/522/14…	5:EVT	3			Whole PE	R-HSA-5689603	UCH proteinases	81	0.553755	2.13313	1.43144e-07	2.26483e-06	1.84644e-06	2856	tags=53%, list=18%, signal=44%	5692/5709/5685/5710/10213/5713/7314/5717/5700/5695/5682/5684/5690/11047/5687/9861/5688/4738/5701/5691/10197/5704/5686/5683/5721/83444/5714/5689/7311/7979/7316/5693/5719/5702/6233/7347/29844/5705/5694/5720/7345/8607/5706	1:CTB	2
Whole PE	GO:1903530	regulation of secretion by cell	384	0.263986	1.44348	0.000150947	0.0113093	0.00979111	2472	tags=27%, list=18%, signal=22%	6281/4763/4282/382/5872/613/9146/23607/51762/399687/5724/3783/23400/5978/6696/302/5025/7251/27342/10859/3916/8609/3569/7097/5898/64215/6813/7110/7099/56729/348/7040/7849/7042/3684/55636/6385/51714/79971/84062/10059/8832/5530/5908/28984/4905/10312/4067/10765/3553/5443/10497/57617/3552/6804/84961/101/2213/9545/706/1595/135/6850/1946/9525/2867/10307/18/4923/57102/8291/1855/3091/6812/91942/5071/5592/…	10:Monocyte	1			EOPE	hsa04714	Thermogenesis	178	-0.381198	-1.90397	5.93694e-07	6.9858e-05	5.33283e-05	2467	tags=38%, list=20%, signal=31%	4713/4706/6602/5567/2778/1347/91942/28958/4701/4714/4700/6604/9551/4728/27089/4709/4707/506/10476/51103/10975/3265/79133/498/51703/4698/4708/51079/4726/1345/116228/51241/4723/1374/64223/4711/6601/522/148327/84987/126328/4729/4696/25915/4718/521/4702/6390/516/55967/1337/84335/10063/341947/170712/513/6199/284184/6598/2260/60/4717/10488/6389/1537/2181/6009	5:EVT	3			Whole PE	R-HSA-9678108	SARS-CoV-1 Infection	132	0.483863	1.99603	1.84425e-07	2.86935e-06	2.33929e-06	3662	tags=52%, list=22%, signal=41%	6224/7531/5094/6218/1915/6194/5478/6205/128866/7314/4869/85437/7529/3838/6209/6217/7329/7532/6202/6203/4245/9111/3661/10465/3178/6208/57506/6230/6193/6207/6206/23193/7311/7316/79643/6229/6189/2280/6222/834/6210/6233/5589/6188/6228/5479/27243/7415/6201/6227/2810/8737/6232/6480/7341/6187/2197/6223/11035/5706/6235/861/6234/51065/821/29082/3837/5970/6204	1:CTB	2
Whole PE	GO:0043473	pigmentation	83	0.408892	1.8234	0.000158192	0.0115232	0.00997629	2756	tags=36%, list=20%, signal=29%	967/9839/4763/26985/2647/6648/89781/8975/8195/8546/10981/348/4286/84062/200576/5443/114803/3257/26258/10540/1910/126321/65082/7428/54507/8455/162/1130/4647/8907	10:Monocyte	1			EOPE	hsa03060	Protein export	29	-0.646334	-2.27322	6.62092e-06	0.000584296	0.000446041	2424	tags=59%, list=19%, signal=47%	439/7485/6731/6726/23480/29927/29100/7095/28972/6734/6728/58477/10952/90701/9789/7917/60559	5:EVT	3			Whole PE	R-HSA-1168372	Downstream signaling events of B Cell Receptor (BCR)	80	0.563421	2.16026	2.01768e-07	3.11322e-06	2.53811e-06	2419	tags=55%, list=15%, signal=47%	5692/5709/5685/5710/10213/5478/5713/7314/808/5717/5700/5695/5966/5682/5684/6500/5690/5687/801/9861/5688/4793/5701/5691/10197/5704/5686/4794/5683/5721/5714/5689/7311/7979/7316/5693/5719/2280/5702/6233/5705/805/5694/5720	1:CTB	2
Whole PE	GO:0036294	cellular response to decreased oxygen levels	107	0.380681	1.75026	0.000159775	0.0115232	0.00997629	2503	tags=34%, list=18%, signal=28%	5291/28996/7009/665/5163/4193/2023/9475/5034/664/7040/26608/207/867/51142/6714/9520/28984/10370/101/114990/7248/3091/10525/4000/10397/8996/4609/84890/7428/10449/5468/1386/3779/29904/468	10:Monocyte	1			EOPE	hsa05012	Parkinson disease	209	-0.34069	-1.74031	1.33516e-05	0.000785521	0.000599653	3174	tags=49%, list=25%, signal=38%	3799/6392/5700/5715/7494/1327/5719/11315/10213/5686/1340/518/9167/7384/7311/4724/5707/4716/4722/7417/5692/1346/7381/7295/7388/808/4713/4706/5567/2778/1347/4701/4714/4700/4728/7979/27089/6622/29985/4709/4707/506/7157/7326/10476/55630/10975/4137/498/84790/4698/25828/598/4708/51079/4726/5413/581/1345/4723/5710/10376/9817/203068/4711/5683/5693/522/5705/2771/126328/4729/4696/1616/65018/7280/4718/4702/…	5:EVT	3			Whole PE	R-HSA-5610787	Hedgehog 'off' state	103	0.518865	2.08077	2.14635e-07	3.25792e-06	2.65607e-06	2419	tags=47%, list=15%, signal=40%	7277/5692/7280/5709/5685/10381/5710/10213/5713/7314/111/5717/5700/5695/5682/5684/6500/5690/5687/9861/5688/5701/5691/10197/5704/84790/5686/5683/5721/7846/196883/51684/5714/5689/7311/7979/10383/7316/5693/5719/5702/9978/6233/55811/5705/5694/5575/5720	1:CTB	2
Whole PE	GO:0007169	transmembrane receptor protein tyrosine kinase signaling pathway	438	0.261949	1.44479	0.000159544	0.0115232	0.00997629	2049	tags=22%, list=15%, signal=19%	5291/1509/967/56034/2885/860/9019/2069/2260/5795/2889/25976/6655/51094/9146/92799/5166/5879/8828/7251/27342/9361/8036/5970/5898/51043/8440/57732/7423/1796/7040/23390/57727/207/2048/5305/4035/2537/867/55704/4233/6714/2152/1499/7474/3716/118813/57142/5894/4067/3553/5782/10999/27020/130617/9052/10461/3678/1317/3489/64855/6259/9693/55022/8826/6777/51552/54206/10006/3488/6850/1946/3487/9788/5605/6654/…	10:Monocyte	1			EOPE	hsa05415	Diabetic cardiomyopathy	154	-0.365237	-1.79117	2.09645e-05	0.00105721	0.000807056	3123	tags=44%, list=25%, signal=34%	1340/518/9167/2997/7384/7040/4724/4716/4722/208/7417/5465/1346/5524/7381/7388/5296/4713/4706/1347/4701/4714/4700/4728/27089/4709/4707/506/10476/10975/498/5499/4698/4708/51079/4726/5880/1345/4723/7046/6667/5879/7042/4711/2936/522/126328/4729/4696/23236/4718/4702/6390/516/55967/25874/1337/653361/341947/2597/170712/513/6513/185/4717/6389/1537/291	5:EVT	3			Whole PE	R-HSA-9758941	Gastrulation	89	0.537169	2.10287	2.82035e-07	4.24645e-06	3.46199e-06	2430	tags=46%, list=15%, signal=39%	2296/5692/5709/5685/5710/10213/5713/5717/2627/5700/5695/5682/6615/5684/5453/5690/5687/9861/2043/5688/5701/5691/10197/5704/5686/5683/5721/5714/5689/7979/5693/5719/5702/3955/5705/7852/2648/5694/84667/5720/6911	1:CTB	2
Whole PE	GO:0048771	tissue remodeling	119	0.370134	1.71049	0.000166094	0.0118681	0.0102749	2505	tags=34%, list=18%, signal=28%	4763/613/5166/1200/4193/6696/9475/3569/10512/64114/4286/7040/861/3606/55636/6714/4790/1499/5530/171392/10312/3552/101/659/9545/7128/3488/6850/3091/4054/6522/578/5880/10457/5468/9474/3952/56834/9842/6093/169200	10:Monocyte	1			EOPE	hsa05417	Lipid and atherosclerosis	156	0.411898	1.7796	3.24651e-05	0.00114602	0.00087485	2562	tags=32%, list=20%, signal=26%	3310/3304/2920/4792/4973/3725/3306/818/3576/23643/4217/4780/3320/5451/7410/7124/5452/6648/9475/8795/6352/91860/6348/842/4790/23118/3665/29110/9641/5532/2921/5530/7409/1965/207/839/4615/3551/468/9451/10451/6774/4773/4772/3308/3383/841/3312/114609/817	5:EVT	3			Whole PE	R-HSA-8939236	RUNX1 regulates transcription of genes involved in differentiation of HSCs	66	0.579748	2.14455	2.99798e-07	4.47778e-06	3.65059e-06	2517	tags=56%, list=15%, signal=48%	5692/5709/5685/5710/10213/5713/7314/5717/5700/5695/5682/5684/5690/5687/9861/5688/5701/5691/10197/5704/5686/5683/5721/5714/5689/7311/7979/7316/5693/2624/5719/5702/6233/5705/5694/5720/6929	1:CTB	2
Whole PE	GO:1903753	negative regulation of p38MAPK cascade	7	-0.874073	-1.87414	0.000178948	0.0124409	0.0107708	1308	tags=57%, list=10%, signal=52%	26191/11221/1540/1843	10:Monocyte	1			EOPE	hsa05014	Amyotrophic lateral sclerosis	284	-0.309148	-1.63469	2.80708e-05	0.00114602	0.00087485	2467	tags=32%, list=20%, signal=27%	4713/4706/55706/7415/1347/11258/4701/4714/4700/5868/55860/4728/7979/27089/5216/310/4709/4218/4707/3178/506/7157/10476/25978/10975/10121/5217/498/84790/4698/598/4708/51079/10120/4726/581/6396/1345/10452/4723/5710/10376/55062/145957/5879/203068/4711/5683/5693/9631/522/5705/126328/4729/30849/4696/1616/65018/7280/4718/4702/220988/10762/5709/10126/6390/516/55967/1639/1337/5702/84617/341947/10280/9861/…	5:EVT	3			Whole PE	R-HSA-9663891	Selective autophagy	69	0.559557	2.08636	8.75633e-07	1.26729e-05	1.03318e-05	2469	tags=43%, list=15%, signal=37%	7277/7280/10226/10381/7334/7314/123/56993/8655/7335/401505/3297/1460/8878/84790/3320/7846/192111/100188893/7311/11315/10383/7316/6233/1781/7416/7415/9804/3312/84557	1:CTB	2
Whole PE	GO:0070841	inclusion body assembly	18	-0.702725	-1.98459	0.000194058	0.0128565	0.0111306	104	tags=33%, list=1%, signal=33%	10049/3303/55466/3304/3337/9531	10:Monocyte	1			EOPE	hsa04979	Cholesterol metabolism	33	-0.575657	-2.08379	7.18237e-05	0.00195029	0.00148882	2589	tags=52%, list=21%, signal=41%	4043/3988/19/1593/6272/57552/10577/10948/949/6646/114879/4864/3949/51129/4035/9388/4023	5:EVT	3			Whole PE	R-HSA-2871837	FCERI mediated NF-kB activation	75	0.545682	2.08099	1.00978e-06	1.4502e-05	1.1823e-05	2419	tags=52%, list=15%, signal=44%	5692/5709/5685/7334/5710/10213/5713/7314/5717/7335/5700/5695/5682/5684/6500/5690/5687/9861/5688/5701/5691/10197/5704/5686/5683/5721/4067/5714/5689/7311/7979/7316/5693/5719/5702/6233/5705/5694/5720	1:CTB	2
Whole PE	GO:0045766	positive regulation of angiogenesis	116	0.379928	1.76154	0.000194895	0.0128565	0.0111306	1172	tags=23%, list=9%, signal=21%	28996/5315/1545/3688/2896/8877/6237/2022/51129/10000/7048/7423/4814/3576/861/56005/10298/2152/7474/3716/92140/3696/694/3553/3552/719/3678	10:Monocyte	1			EOPE	hsa04668	TNF signaling pathway	90	0.439514	1.75469	0.000578982	0.010219	0.00780102	2543	tags=36%, list=20%, signal=29%	2920/3726/4792/3725/1326/4217/6868/8737/3659/182/1385/329/7124/6352/4790/23118/8986/2921/10059/330/9586/7133/207/3551/83737/9252/468/8809/3383/841/843/79651	5:EVT	3			Whole PE	R-HSA-453274	Mitotic G2-G2/M phases	183	0.425919	1.82617	1.39671e-06	1.96064e-05	1.59845e-05	2856	tags=42%, list=18%, signal=35%	7277/5692/7531/7280/115106/51400/5709/5685/10381/5518/5710/10213/3326/51451/5713/7314/95681/5717/8655/22822/5700/5695/5682/1063/995/7532/5684/6500/5690/9814/5687/1454/9861/5688/5701/5691/10197/5704/84790/3320/5686/9088/5683/5721/4605/203068/7846/984/5714/5689/7311/7979/10383/7316/4218/5693/5719/132660/5702/9978/6233/5705/994/1781/55957/22974/5694/890/5720/2305/7283/728642/51512/8636/983/5706	1:CTB	2
Whole PE	GO:1904018	positive regulation of vasculature development	116	0.379928	1.76154	0.000194895	0.0128565	0.0111306	1172	tags=23%, list=9%, signal=21%	28996/5315/1545/3688/2896/8877/6237/2022/51129/10000/7048/7423/4814/3576/861/56005/10298/2152/7474/3716/92140/3696/694/3553/3552/719/3678	10:Monocyte	1			EOPE	hsa05010	Alzheimer disease	294	-0.272778	-1.43702	0.000754079	0.0123267	0.00941	2553	tags=32%, list=20%, signal=26%	1457/7388/5296/808/7976/1856/4713/4706/1347/8325/7476/4701/4714/4700/4728/7979/27089/6622/29985/8772/4709/4707/506/10476/55630/10975/4137/3265/498/84790/4698/1460/8326/1020/4708/51079/4726/8323/1345/4723/5710/10376/55062/203068/4711/5683/5693/522/5705/126328/4729/55851/30849/4696/23236/7280/4718/4702/5709/6390/516/55967/1337/5702/10313/27173/84617/341947/5605/23385/2597/9861/170712/805/513/5690/2…	5:EVT	3			Whole PE	R-HSA-68882	Mitotic Anaphase	216	0.414123	1.8066	1.58525e-06	2.2087e-05	1.80068e-05	4003	tags=47%, list=25%, signal=36%	7277/5692/7280/991/5709/5685/10381/27338/5518/5710/10213/128866/5713/7314/9212/5717/8655/5901/5700/5695/5682/7329/81929/11004/64946/1058/1063/55839/5684/5690/332/5687/8815/9861/5688/5701/5691/10197/5704/84790/5686/5683/5721/7846/10726/64105/5714/5689/7311/7979/10383/7316/79643/83540/7324/79023/5693/5719/5702/6233/55143/11065/147841/5705/1781/27243/4085/5905/701/6232/5694/5720/7341/246184/1062/983…	1:CTB	2
Whole PE	GO:0010001	glial cell differentiation	158	0.334493	1.62356	0.000187724	0.0128565	0.0111306	1706	tags=23%, list=13%, signal=21%	9839/7431/5728/4763/2896/56978/387/5339/1902/1959/9948/8613/2908/5970/3569/7097/3845/7099/664/3398/7040/207/3611/4035/1499/8890/4067/51542/3553/5270/135/1605/274/9682/5594/6426/4615	10:Monocyte	1			EOPE	hsa05171	Coronavirus disease - COVID-19	166	0.359814	1.568	0.000955253	0.0140502	0.0107256	988	tags=14%, list=8%, signal=13%	4938/4940/64135/4792/3725/4600/5610/3576/7098/629/6868/4939/7124/6772/8829/4599/7450/4790/23118/712/1675/29110/9641	5:EVT	3			Whole PE	R-HSA-9755511	KEAP1-NFE2L2 pathway	120	0.480984	1.96455	1.63425e-06	2.22712e-05	1.8157e-05	2449	tags=42%, list=15%, signal=36%	5692/5709/5685/5710/7295/10213/6888/5713/7314/5717/3162/374/5052/5700/5695/10061/5682/10072/5684/6500/5690/5687/9861/1460/5688/8878/7353/5701/5691/10197/5704/5686/5683/5721/5714/5689/7311/7979/7316/4609/5693/5719/5702/9978/6233/5705/7415/5694/5720/2940	1:CTB	2
Whole PE	GO:0010721	negative regulation of cell development	182	0.319036	1.60107	0.000195588	0.0128565	0.0111306	2610	tags=35%, list=19%, signal=28%	5728/4763/1495/5978/6696/10859/3569/10512/51043/7099/84376/6461/3398/11006/359845/2048/861/7533/1499/7474/1378/8408/57142/5530/171392/4067/3553/3552/10501/2213/706/4092/57609/25793/6259/9693/8848/714/10507/9682/7070/10401/64689/3659/567/9935/1910/9856/6522/4609/140685/54542/11025/6049/7130/56834/6993/301/6988/7442/8111/2931/10766	10:Monocyte	1			EOPE	hsa04064	NF-kappa B signaling pathway	80	0.428137	1.67054	0.00166426	0.0189511	0.0144669	4083	tags=54%, list=32%, signal=37%	7706/2920/4792/1647/3576/23643/8737/5971/329/7124/10848/597/4790/23118/5328/4616/2921/330/4615/3551/4050/3383/114609/84433/128178/6885/10892/79092/27040/148022/5970/10912/472/29760/1540/8792/3553/6366/8837/6351/7187/7535/7128	5:EVT	3			Whole PE	R-HSA-69275	G2/M Transition	181	0.426709	1.82413	1.63196e-06	2.22712e-05	1.8157e-05	2856	tags=42%, list=18%, signal=35%	7277/5692/7531/7280/115106/51400/5709/5685/10381/5518/5710/10213/3326/51451/5713/7314/95681/5717/8655/22822/5700/5695/5682/1063/995/7532/5684/6500/5690/9814/5687/1454/9861/5688/5701/5691/10197/5704/84790/3320/5686/9088/5683/5721/4605/203068/7846/984/5714/5689/7311/7979/10383/7316/4218/5693/5719/132660/5702/9978/6233/5705/994/1781/55957/22974/5694/890/5720/2305/7283/728642/51512/8636/983/5706	1:CTB	2
Whole PE	GO:0019693	ribose phosphate metabolic process	302	-0.335953	-1.53893	0.000192446	0.0128565	0.0111306	3129	tags=34%, list=23%, signal=27%	4708/5144/10965/4713/27284/84188/84836/10005/516/27115/4726/471/6391/9605/525/8034/2181/64087/3704/514/109/2639/136332/1723/79877/506/11001/51024/8876/4701/4710/7372/515/2773/196883/51292/55902/4725/6296/526/50808/498/5471/65018/785/55811/31/79621/2618/5198/8622/54995/65220/4704/9551/64834/5164/4830/8801/32/522/4717/4731/4723/10632/8802/9524/4706/126328/60490/57673/4712/4707/9567/4705/113/1633/52…	10:Monocyte	1			EOPE	hsa05022	Pathways of neurodegeneration - multiple diseases	352	-0.250931	-1.35225	0.00164893	0.0189511	0.0144669	2553	tags=30%, list=20%, signal=25%	1457/7388/808/7976/1856/4713/4706/7415/1347/8325/11258/7476/4701/4714/4700/5868/55860/4728/7979/27089/6622/8772/4709/4218/4707/506/7326/10476/25978/10975/3064/10121/4137/3265/498/84790/4698/1460/8326/1020/598/4708/51079/10120/4726/5413/8323/581/6310/1345/10452/4723/5710/10376/55062/5879/203068/4711/5683/5693/522/5705/126328/4729/30849/4696/1616/23236/65018/7280/4718/4702/5709/10126/6390/516/55967…	5:EVT	3			Whole PE	R-HSA-2555396	Mitotic Metaphase and Anaphase	217	0.413494	1.80362	1.74724e-06	2.33064e-05	1.9001e-05	4003	tags=47%, list=25%, signal=36%	7277/5692/7280/991/5709/5685/10381/27338/5518/5710/10213/128866/5713/7314/9212/5717/8655/5901/5700/5695/5682/7329/81929/11004/64946/1058/1063/55839/5684/5690/332/5687/8815/9861/5688/5701/5691/10197/5704/84790/5686/5683/5721/7846/10726/64105/5714/5689/7311/7979/10383/7316/79643/83540/7324/79023/5693/5719/5702/6233/55143/11065/147841/5705/1781/27243/4085/5905/701/6232/5694/5720/7341/246184/1062/983…	1:CTB	2
Whole PE	GO:0150116	regulation of cell-substrate junction organization	56	0.469772	1.90139	0.000198521	0.0128738	0.0111456	1747	tags=32%, list=13%, signal=28%	6281/5728/382/5795/387/79834/5879/23603/9475/7094/6385/6714/3987/342184/7248/1946/7070/5786	10:Monocyte	1			EOPE	hsa04660	T cell receptor signaling pathway	97	0.384666	1.55477	0.00462939	0.0390849	0.0298367	4038	tags=49%, list=32%, signal=34%	4792/919/3725/1326/7410/7124/5058/5520/5527/4790/5532/5530/7409/5777/55012/207/6654/2534/4793/3551/5529/10451/10298/915/4794/4773/4772/3937/5519/84433/6885/5602/10892/27040/5970/3845/2932/7006/5595/5521/6655/5533/5594/917/5603/8503/4775/7535	5:EVT	3			Whole PE	R-HSA-9020702	Interleukin-1 signaling	108	0.485306	1.94804	2.54755e-06	3.37325e-05	2.7501e-05	2564	tags=43%, list=16%, signal=36%	5692/5709/5685/7334/5710/10213/5713/7314/5717/7335/5700/5695/5682/5684/6500/5690/5687/9861/5688/8878/4793/5701/5691/10197/5704/5686/5683/5721/3554/3552/5714/5689/7311/7979/7316/5693/5719/5702/9978/6233/5705/84166/5694/5720/1326/11213	1:CTB	2
Whole PE	GO:1904816	positive regulation of protein localization to chromosome, telomeric region	10	-0.801019	-1.92671	0.000203727	0.0131013	0.0113426	1144	tags=60%, list=8%, signal=55%	10574/908/10576/7203/10575/6950	10:Monocyte	1			EOPE	hsa05208	Chemical carcinogenesis - reactive oxygen species	168	-0.285564	-1.42676	0.00558967	0.0427975	0.0326708	3123	tags=39%, list=25%, signal=30%	1340/518/9167/7384/5170/4724/4716/4722/208/7417/5604/1346/7381/57412/52/7388/5296/4713/4706/1347/4701/4714/4700/9020/4728/27089/4709/4707/506/10476/10975/3265/498/4698/4708/51079/4726/1345/4723/2948/5879/9817/4711/522/126328/4729/10327/4696/4718/4702/119391/6390/516/55967/1337/653361/341947/5605/170712/513/873/1147/4717/6389/1537/291	5:EVT	3			Whole PE	R-HSA-8948751	Regulation of PTEN stability and activity	65	0.563022	2.08935	2.62639e-06	3.45315e-05	2.81524e-05	2419	tags=55%, list=15%, signal=47%	5692/5709/5685/5710/10213/5713/7314/5717/5700/5695/5682/5684/5690/5687/9861/1460/5688/5701/5691/10197/5704/5686/5683/5721/5714/5689/7311/7979/7316/5693/5719/5702/6233/5705/5694/5720	1:CTB	2
Whole PE	GO:0002369	T cell cytokine production	29	0.58226	1.98614	0.000227429	0.0139365	0.0120657	1210	tags=38%, list=9%, signal=35%	975/3105/3554/3569/114548/11006/3606/163486/3553/6504/4092	10:Monocyte	1			EOPE	hsa04668	TNF signaling pathway	99	-0.56191	-2.32292	1.3104e-09	2.31285e-07	1.7518e-07	1738	tags=39%, list=14%, signal=34%	5604/329/10488/5603/7132/64764/9020/7124/9586/7185/8717/5290/2353/7186/3725/207/10000/5602/197259/1051/3569/6347/5606/3726/9021/1326/3627/4790/6374/7412/7424/6352/3659/2920/3383/2921/2919/4792/7128	6:Decidual	3			Whole PE	R-HSA-6811438	Intra-Golgi traffic	43	-0.608148	-2.24064	3.03769e-06	3.93845e-05	3.21089e-05	3273	tags=56%, list=20%, signal=45%	10228/9266/27314/11311/22796/57134/4121/9321/83548/91949/8774/27333/10466/8675/9527/9382/143187/10905/4905/1523/63908/9950/57589/57511	1:CTB	2
Whole PE	GO:0002724	regulation of T cell cytokine production	29	0.58226	1.98614	0.000227429	0.0139365	0.0120657	1210	tags=38%, list=9%, signal=35%	975/3105/3554/3569/114548/11006/3606/163486/3553/6504/4092	10:Monocyte	1			EOPE	hsa04064	NF-kappa B signaling pathway	78	-0.55914	-2.20904	1.17193e-07	1.37897e-05	1.04446e-05	1885	tags=35%, list=15%, signal=30%	10892/7329/329/5328/353376/7132/9020/7124/7185/8717/7186/597/10912/5971/4616/958/148022/4790/7412/1647/2920/3383/2921/2919/3576/4792/7128	6:Decidual	3			Whole PE	R-HSA-1268020	Mitochondrial protein import	58	0.570087	2.05406	3.95393e-06	5.09103e-05	4.15055e-05	4018	tags=59%, list=25%, signal=44%	92609/388753/56993/401505/51287/131118/80273/2395/51025/197257/617/10469/100188893/10440/51142/26520/10063/131474/26517/516/3329/84269/7416/79145/9804/26521/54543/400916/4580/3313/150274/10452/2671/26519	1:CTB	2
Whole PE	GO:0014910	regulation of smooth muscle cell migration	53	0.479432	1.95253	0.00022755	0.0139365	0.0120657	1559	tags=30%, list=11%, signal=27%	54434/9732/1545/4763/4193/1902/7099/11057/4035/85440/6714/2768/5328/6282/3488/3486	10:Monocyte	1			EOPE	hsa03060	Protein export	28	0.622749	2.05226	0.000139231	0.00315018	0.002386	2572	tags=50%, list=20%, signal=40%	90701/60559/6449/29927/23480/6730/3309/5018/55176/7917/6729/11231/83943/29100	6:Decidual	3			Whole PE	R-HSA-72203	Processing of Capped Intron-Containing Pre-mRNA	264	0.372181	1.67182	1.4748e-05	0.000179022	0.000145951	3783	tags=36%, list=23%, signal=28%	4809/6626/5437/3183/5094/51759/5093/22826/6629/9939/6633/10284/153527/85437/83443/6632/10482/51639/6634/6637/7307/4904/2962/10286/81929/5439/27258/26097/6636/5436/9775/51503/10907/6627/10713/51690/10450/4116/5435/10189/8896/53938/6631/10465/3178/6428/3190/11066/55954/4670/151903/84324/59286/25949/79023/23658/51645/25804/5438/6635/5356/51428/26017/5434/10081/11017/6628/3312/3185/56949/22827/8480/8…	1:CTB	2
Whole PE	GO:0070203	regulation of establishment of protein localization to telomere	10	-0.79758	-1.91844	0.000222766	0.0139365	0.0120657	1144	tags=60%, list=8%, signal=55%	10574/908/10576/7203/10575/6950	10:Monocyte	1			EOPE	hsa05417	Lipid and atherosclerosis	161	-0.374592	-1.67305	0.000187845	0.00390054	0.00295434	1883	tags=27%, list=15%, signal=24%	1965/839/3329/2081/801/637/4772/6349/5603/353376/7132/3320/3265/834/7124/54205/817/5290/2353/7186/3312/3725/207/10000/5602/581/3569/4773/6347/5606/958/148022/4790/6648/7412/6352/2920/3383/2921/3303/3304/2919/3576/4792	6:Decidual	3			Whole PE	R-HSA-3371497	HSP90 chaperone cycle for steroid hormone receptors (SHR) in the presence of ligand	46	0.574136	1.98293	5.32765e-05	0.000617808	0.000503679	3881	tags=52%, list=24%, signal=40%	7277/7280/10381/3326/8655/3304/2288/10671/3301/84790/3320/7846/10383/10728/3337/3306/1781/10963/3312/55860/10376/832/55466/84617	1:CTB	2
Whole PE	GO:0007033	vacuole organization	200	0.312319	1.5853	0.000222149	0.0139365	0.0120657	1903	tags=27%, list=14%, signal=24%	1509/112574/2896/26100/5119/11345/1200/23400/533/51606/89781/55062/302/8546/23232/7805/84376/55968/56270/9821/83871/2048/5305/51172/51100/91782/8804/8408/10312/9296/200576/51542/57617/23503/57154/401548/8897/3257/84557/9140/9554/9776/19/51552/8720/9525/55823/79158/23647/79643/79142/90678/83460/5538	10:Monocyte	1			EOPE	hsa04081	Hormone signaling	105	0.378417	1.61675	0.00289233	0.0268682	0.0203504	2341	tags=33%, list=18%, signal=27%	4883/5617/30061/3481/109/3643/5618/107/10268/8660/3480/1442/23236/5567/6714/10267/3667/1443/4881/3690/10672/5745/3953/6794/51094/2778/115/3717/2767/6774/8503/2768/2783/4882/108	6:Decidual	3			Whole PE	R-HSA-389977	Post-chaperonin tubulin folding pathway	15	0.765149	2.02513	5.39315e-05	0.000621543	0.000506724	3232	tags=87%, list=20%, signal=70%	7277/7280/10381/1155/6903/84790/6904/7846/10383/402/6902/6905/10376	1:CTB	2
Whole PE	GO:0014002	astrocyte development	33	0.564611	1.97824	0.000233904	0.0141296	0.0122328	1385	tags=30%, list=10%, signal=27%	9839/7431/4763/2896/3569/3845/7099/4035/3553/135	10:Monocyte	1			EOPE	hsa04979	Cholesterol metabolism	34	0.504019	1.71285	0.00544418	0.0384359	0.029112	336	tags=21%, list=3%, signal=20%	341/348/345/949/335/19/6646	6:Decidual	3			Whole PE	R-HSA-69620	Cell Cycle Checkpoints	249	0.357945	1.59598	0.000124728	0.00136179	0.00111023	3150	tags=36%, list=19%, signal=29%	5692/7531/991/5709/5685/7334/27338/5518/5710/10213/5713/7314/9212/7529/63967/5717/8655/5700/5695/5682/81929/11004/64946/1058/9156/1063/995/7532/55839/5684/5690/83695/332/5687/9861/5688/5701/5691/10197/5704/5686/9088/5683/5721/10726/64105/5714/5689/7311/7979/5982/7316/83540/29086/7324/79023/5693/5719/5702/6233/55143/11065/147841/5705/1781/4085/9134/5905/2810/701/6232/5694/890/5720/246184/84126/105…	1:CTB	2
Whole PE	GO:1903405	protein localization to nuclear body	11	-0.782579	-1.94024	0.000237033	0.0141296	0.0122328	1432	tags=64%, list=11%, signal=57%	51574/10574/908/10576/7203/10575/6950	10:Monocyte	1			EOPE	hsa00190	Oxidative phosphorylation	103	-0.665943	-3.01718	1e-10	3.21818e-09	2.27751e-09	2058	tags=62%, list=17%, signal=52%	4710/4726/4723/4717/526/155066/4728/10476/4725/4731/7386/4702/8992/506/10632/10312/522/1345/54205/4695/4701/539/4707/29796/498/126328/55967/4716/6389/9167/4722/4713/51079/4697/7381/9551/1347/9377/5464/1351/516/514/4715/1337/4709/1537/4714/521/1327/513/4711/1340/10975/374291/1329/4700/518/9296/10063/7388/6392/1350/4708/517	8:Macrophage-1	3			Whole PE	R-HSA-68886	M Phase	331	0.33673	1.53736	0.000137485	0.00149235	0.00121666	4010	tags=39%, list=25%, signal=30%	7277/5692/7531/7280/115106/991/5709/5685/10381/27338/5518/5710/10213/128866/5595/5713/7314/9212/95681/5717/8655/10112/9493/5901/5700/5695/64151/5682/7329/81929/11004/64946/81876/1058/23399/1063/7532/55839/5684/84930/5690/332/9814/5687/1454/8815/9861/1460/5688/2029/5701/5691/10197/5704/84790/3320/387893/5686/5683/5721/203068/7846/10726/64105/5714/5689/7311/7979/10383/7316/79643/83540/7324/79023/56…	1:CTB	2
Whole PE	GO:1904867	protein localization to Cajal body	11	-0.782579	-1.94024	0.000237033	0.0141296	0.0122328	1432	tags=64%, list=11%, signal=57%	51574/10574/908/10576/7203/10575/6950	10:Monocyte	1			EOPE	hsa05012	Parkinson disease	205	-0.523356	-2.65362	1e-10	3.21818e-09	2.27751e-09	2562	tags=51%, list=21%, signal=41%	4696/317/5701/5702/27089/4706/7327/6647/7417/51465/5713/4710/4726/5692/4723/581/808/4717/5693/5710/5719/4728/7157/10476/5682/4725/5691/4731/9861/7846/7386/4702/7419/3708/10105/201266/506/5687/5709/522/5714/1345/7332/54205/4695/5704/4701/805/539/55630/5685/4707/29796/7311/498/126328/55967/65018/4716/5686/6389/9167/4722/4713/10376/51079/4697/7381/1347/9377/1351/25828/203068/7979/5689/516/514/4715/1…	8:Macrophage-1	3			Whole PE	R-HSA-109582	Hemostasis	492	0.309812	1.46346	0.000185739	0.00197031	0.00160633	4711	tags=36%, list=29%, signal=27%	7277/5269/9123/5879/2788/3797/7280/6647/6717/3678/5155/2886/10381/23764/2771/5518/5478/3675/2767/1191/387/5595/88/808/965/4282/5271/10112/483/408/9493/80228/2627/967/10487/5216/11343/22927/10603/11004/9732/1607/388/998/8140/5025/7422/481/5590/2768/801/8407/7078/3481/27345/11069/84790/6385/1608/6520/972/2787/57406/7846/948/4067/5919/64147/55970/6464/30845/10544/64780/10383/10749/2791/2624/3833/391…	1:CTB	2
Whole PE	GO:0051893	regulation of focal adhesion assembly	51	0.492277	1.96971	0.000254154	0.0145282	0.0125779	1747	tags=33%, list=13%, signal=29%	6281/5728/5795/387/79834/5879/23603/9475/7094/6385/6714/3987/342184/7248/1946/7070/5786	10:Monocyte	1			EOPE	hsa05016	Huntington disease	235	-0.500032	-2.59726	1e-10	3.21818e-09	2.27751e-09	2058	tags=45%, list=17%, signal=38%	4710/4726/5692/163/7052/4723/581/4717/10126/5693/1175/9519/5710/5719/4728/7157/10476/5682/4725/5691/5438/4731/9861/7846/60673/7386/4702/7419/3708/10105/5432/506/5440/5687/5434/5709/522/5714/1345/23236/54205/5435/4695/5704/4701/10671/539/5685/4707/29796/498/126328/55967/4716/5437/5686/6389/9167/4722/4713/10376/1212/51079/10540/4697/7381/1347/9377/64446/1351/8678/203068/7979/5689/516/514/4715/1337/…	8:Macrophage-1	3			Whole PE	R-HSA-380108	Chemokine receptors bind chemokines	35	0.582624	1.89767	0.000251967	0.00265775	0.00216678	2320	tags=34%, list=14%, signal=29%	10663/2920/6846/2919/2921/3576/1230/6352/51554/6375/7852/1238	1:CTB	2
Whole PE	GO:0090109	regulation of cell-substrate junction assembly	51	0.492277	1.96971	0.000254154	0.0145282	0.0125779	1747	tags=33%, list=13%, signal=29%	6281/5728/5795/387/79834/5879/23603/9475/7094/6385/6714/3987/342184/7248/1946/7070/5786	10:Monocyte	1			EOPE	hsa05171	Coronavirus disease - COVID-19	171	-0.520362	-2.58145	1e-10	3.21818e-09	2.27751e-09	1193	tags=44%, list=10%, signal=41%	6152/51187/7297/6175/6181/6144/6169/6227/6132/7311/6133/6161/6157/6204/6218/6223/6232/11224/6176/6139/6228/6130/6137/6154/6167/6235/6230/6193/6155/6206/6217/6156/6135/3921/6229/2197/6129/51121/6124/6207/6128/6188/6203/6165/6171/6210/6146/6125/6143/6136/6168/6233/6147/6166/6158/51065/6138/9045/6122/6209/6142/6160/6222/3553/6234/6187/6202/6208/4736/718/6201/6164/6194/6141/6189/6159	8:Macrophage-1	3			Whole PE	R-HSA-6805567	Keratinization	51	0.521728	1.83301	0.000265433	0.00276851	0.00225708	2482	tags=31%, list=15%, signal=27%	144501/83896/3856/3728/3875/7062/6768/3880/25984/3872/11187/5493/5652/730755/5045/2125	1:CTB	2
Whole PE	GO:0007009	plasma membrane organization	110	0.381182	1.74654	0.000257423	0.0146068	0.012646	2477	tags=34%, list=18%, signal=28%	6281/112574/5728/11252/79026/10211/5119/5339/23136/196527/51429/302/207/7042/50807/51100/91782/2054/1378/4905/81035/286046/55909/274/9788/9525/79643/309/9935/10397/26509/246777/5580/8560/29082/285973/8841	10:Monocyte	1			EOPE	hsa04714	Thermogenesis	173	-0.514187	-2.55218	1e-10	3.21818e-09	2.27751e-09	1706	tags=42%, list=14%, signal=36%	1374/115/4728/10476/4725/4731/388753/7386/51103/4702/506/86/71/10632/522/1375/1345/6602/4695/4701/539/4707/29796/84335/498/116228/126328/55967/4716/6195/6389/9167/4722/4713/137682/51079/51287/4697/7381/9551/1347/9377/493753/51241/1351/284184/516/514/4715/1337/4709/4893/1537/4714/521/84987/1327/513/4711/1340/10975/374291/1329/4700/518/10063/7388/6392/6194/1350/4708/517	8:Macrophage-1	3			Whole PE	R-HSA-195721	Signaling by WNT	243	0.353276	1.56603	0.000285185	0.002958	0.00241156	3432	tags=38%, list=21%, signal=31%	166/5879/5692/2788/5709/5685/5518/5710/10213/5331/387/5713/7314/808/81029/5717/7090/5216/5700/5695/26523/5682/5145/5684/6500/5690/5687/1454/1212/801/9861/1460/5688/7474/5701/5691/9580/10197/5704/51699/5686/5683/8324/5721/2787/5881/5714/1455/55970/5689/7311/7979/7316/4609/2791/1175/5693/5719/1855/5702/9978/6233/1211/5705/8322/805/7089/6422/5694/123169/5720/283149/50855/6659/4221/10524/5579/7481/83…	1:CTB	2
Whole PE	GO:0046683	response to organophosphorus	89	0.401991	1.8031	0.000263211	0.0146988	0.0127256	1470	tags=25%, list=11%, signal=22%	54434/1545/5311/2889/196/24145/5724/1902/5025/23028/5970/6715/7056/7184/83606/329/5908/3553/2203/9693/1811/3488	10:Monocyte	1			EOPE	hsa05415	Diabetic cardiomyopathy	151	-0.506148	-2.46582	1e-10	3.21818e-09	2.27751e-09	1618	tags=44%, list=13%, signal=38%	4728/10476/4689/5296/4725/4313/4731/5500/7386/4702/7419/10105/506/522/1375/1345/23236/4695/4701/539/4707/29796/208/498/126328/55967/4716/6389/9167/5162/4722/4713/51079/948/5499/4697/7381/1535/1347/9377/1351/516/514/4688/5880/4715/1509/1337/4709/1537/4714/1327/513/4711/1340/10975/374291/7416/1329/4700/518/7388/6392/1350/4708/517	8:Macrophage-1	3			Whole PE	R-HSA-9613829	Chaperone Mediated Autophagy	18	0.691848	1.93874	0.000330974	0.00339521	0.002768	2383	tags=61%, list=15%, signal=52%	10226/1915/3326/7314/123/3320/7311/11315/7316/6233/3312	1:CTB	2
Whole PE	GO:0009259	ribonucleotide metabolic process	298	-0.338584	-1.54973	0.000274438	0.0148168	0.0128277	3129	tags=34%, list=23%, signal=27%	4708/5144/10965/4713/27284/84188/84836/10005/516/27115/4726/471/6391/9605/525/8034/2181/64087/3704/514/109/2639/136332/1723/79877/506/11001/51024/8876/4701/4710/7372/515/2773/196883/51292/55902/4725/6296/526/50808/498/5471/65018/785/55811/31/79621/2618/5198/8622/54995/65220/4704/9551/64834/5164/4830/8801/32/522/4717/4731/4723/10632/8802/9524/4706/126328/60490/57673/4712/4707/9567/4705/113/1633/52…	10:Monocyte	1			EOPE	hsa05014	Amyotrophic lateral sclerosis	278	-0.439912	-2.33665	1e-10	3.21818e-09	2.27751e-09	2202	tags=40%, list=18%, signal=34%	57122/5713/55062/220988/4710/4726/5692/2906/4723/581/4717/10126/5693/10189/55706/5710/5719/8021/4728/7157/10476/5682/4725/7124/7175/5691/4731/9861/7846/60673/7386/4702/506/84557/5687/79902/71/5709/6432/522/5714/1345/54205/6396/4695/5704/4701/10671/539/5685/4707/29796/5608/498/126328/55967/65018/4716/5686/6389/9167/4722/4713/10376/9973/51079/10540/4697/7381/3178/1347/9377/4218/64446/1351/8678/2030…	8:Macrophage-1	3			Whole PE	R-HSA-9637628	Modulation by Mtb of host immune system	7	0.85224	1.81397	0.000382933	0.00382319	0.00311693	1892	tags=71%, list=12%, signal=63%	567/7314/7311/7316/6233	1:CTB	2
Whole PE	GO:0090130	tissue migration	236	0.299547	1.54354	0.000274562	0.0148168	0.0128277	1166	tags=19%, list=9%, signal=17%	5291/9839/5728/1545/4763/3688/5797/382/2896/5872/2260/51094/387/9404/6672/5879/8828/23603/5025/22846/8613/9475/6237/10000/7048/348/7040/811/54453/207/7042/6868/4233/10755/6714/7474/23598/57142/28984/161742/10519/2821/394/659	10:Monocyte	1			EOPE	hsa05010	Alzheimer disease	282	-0.39769	-2.11595	1e-10	3.21818e-09	2.27751e-09	2070	tags=37%, list=17%, signal=32%	5664/4710/4726/5692/2906/4723/808/4717/5693/5595/177/5710/5719/4728/10476/7855/5682/5296/4725/7124/5691/4731/9861/7846/60673/7976/7386/4702/7419/3708/10105/201266/506/3552/5687/1857/5709/522/5714/1345/23236/54205/4695/5704/4701/805/539/55630/5685/4707/29796/208/498/126328/55967/4716/5686/1020/6389/9167/4722/4713/10376/51079/4697/7381/5605/1347/9377/1351/8678/203068/7979/5689/516/514/4715/1965/133…	8:Macrophage-1	3			Whole PE	R-HSA-69278	Cell Cycle, Mitotic	470	0.305225	1.43533	0.000409929	0.00407094	0.00331891	3610	tags=34%, list=22%, signal=28%	7277/5692/7531/7280/115106/991/51400/6241/5709/5685/10381/27338/7153/5518/5710/10213/128866/3326/5595/51451/5713/7314/9212/95681/5425/5717/8655/10112/22822/9493/5901/5700/5695/64151/5682/7329/81929/11004/64946/81876/1058/23399/1063/995/7532/55839/5684/84930/6500/5690/332/9814/5687/1454/8815/9861/1460/5688/2029/5701/5691/10197/5704/84790/3320/387893/5686/9088/5683/5721/4605/203068/7846/10726/4067/…	1:CTB	2
Whole PE	GO:0031623	receptor internalization	91	0.39973	1.78871	0.000284406	0.0152414	0.0131953	1477	tags=25%, list=11%, signal=23%	967/2885/3688/975/57007/79890/10211/9146/1902/302/10859/2060/5898/8898/11006/3576/4289/4035/84062/22943/55697/1213/6850	10:Monocyte	1			EOPE	hsa05022	Pathways of neurodegeneration - multiple diseases	339	-0.367105	-1.98007	1.69903e-10	5.01213e-09	3.54709e-09	2070	tags=34%, list=17%, signal=29%	5664/4710/4726/5692/2906/4723/581/808/4717/10126/5693/5595/177/5710/5719/4728/10476/7855/5682/4725/7124/5691/4731/9861/7846/60673/7976/7386/4702/7419/3708/578/10105/506/84557/3552/5687/1857/5709/522/5714/1345/23236/7332/54205/4695/5704/4701/805/10671/539/5685/4707/29796/7311/5608/498/126328/55967/65018/4716/5686/1020/6389/9167/4722/4713/10376/9973/51079/10540/4697/7381/5605/1347/9377/4218/64446/1…	8:Macrophage-1	3			Whole PE	R-HSA-947581	Molybdenum cofactor biosynthesis	6	-0.876247	-1.90098	0.000751839	0.00701842	0.00572189	150	tags=50%, list=1%, signal=50%	27304/4337/10243	1:CTB	2
Whole PE	GO:0032438	melanosome organization	35	0.537912	1.90061	0.000291567	0.0155174	0.0134343	1522	tags=31%, list=11%, signal=28%	9839/26985/2647/89781/8546/10981/348/84062/200576/3257/26258	10:Monocyte	1			EOPE	hsa05208	Chemical carcinogenesis - reactive oxygen species	166	-0.444746	-2.19763	1.83077e-09	4.98532e-08	3.52812e-08	2562	tags=48%, list=21%, signal=38%	4696/1956/4259/27089/5293/4706/4257/6647/7417/5894/52/4710/4726/4723/4717/5595/7422/4728/10476/5296/4725/4731/7386/4702/7419/10105/506/522/1345/4695/4701/539/3082/4707/29796/208/498/126328/55967/4716/6389/9167/4722/3091/4713/51079/4697/7381/5605/1535/1347/9377/10327/1351/516/514/4688/4715/1337/4709/4893/1537/4714/1327/513/4711/1340/10975/374291/7416/1329/4700/9446/518/7388/6392/1350/4708/517	8:Macrophage-1	3			Whole PE	R-HSA-6785807	Interleukin-4 and Interleukin-13 signaling	89	0.436087	1.70717	0.000995348	0.00910939	0.00742659	3432	tags=34%, list=21%, signal=27%	6624/301/6778/3726/3162/2353/3576/332/7422/3383/3320/51561/6774/3606/948/3552/4609/3689/5292/9021/604/3312/8651/2335/5443/7133/7040/1052/6935/207	1:CTB	2
Whole PE	GO:0048854	brain morphogenesis	24	0.621236	2.06982	0.000304381	0.015979	0.0138339	813	tags=25%, list=6%, signal=24%	5728/23291/4763/8195/10000/7474	10:Monocyte	1			EOPE	hsa04660	T cell receptor signaling pathway	95	0.429408	1.83127	0.000154671	0.00248879	0.00176132	2437	tags=39%, list=20%, signal=31%	84433/5530/919/10451/5534/4773/1432/868/5603/5533/5604/5527/2932/3725/9020/920/8503/4775/5515/5521/6654/8440/5525/3702/1326/10298/5528/5291/5529/940/7410/5594/4772/5588/5519/5601/5295	8:Macrophage-1	3			Whole PE	R-HSA-175474	Assembly Of The HIV Virion	16	0.678247	1.81857	0.0011748	0.0104945	0.00855582	3880	tags=81%, list=24%, signal=62%	5478/7314/55048/79720/9397/7311/7316/6233/89853/5045/51160/51271/93343	1:CTB	2
Whole PE	GO:0001667	ameboidal-type cell migration	316	0.275954	1.47975	0.000335826	0.0175106	0.0151599	1166	tags=17%, list=9%, signal=16%	5291/117584/9839/7145/5728/1545/4763/3688/5797/382/2896/5872/2260/51094/387/9404/5339/6672/5879/8828/23603/5025/22846/8613/9475/6237/10512/10000/7048/348/7040/811/54453/207/7042/3611/6385/6868/4233/10755/6714/65979/7474/23598/57142/28984/2768/161742/10519/10501/2821/394/659	10:Monocyte	1			EOPE	hsa04081	Hormone signaling	90	0.406954	1.72884	0.000679615	0.00801945	0.00567538	1813	tags=30%, list=15%, signal=26%	2099/7068/30061/3479/10267/10681/3685/2776/7253/196883/657/8503/799/151/117247/4089/1442/797/8660/1734/55970/2696/2782/54331/2767/4988/90	8:Macrophage-1	3			Whole PE	R-HSA-8964043	Plasma lipoprotein clearance	33	0.555859	1.77789	0.00117055	0.0104945	0.00855582	1904	tags=36%, list=12%, signal=32%	10577/51599/949/348/26119/7314/3949/7311/7316/1175/6233/1211	1:CTB	2
Whole PE	GO:0021782	glial cell development	80	0.405614	1.78482	0.000351432	0.01808	0.0156529	978	tags=22%, list=7%, signal=21%	9839/7431/5728/4763/2896/56978/5339/1902/3569/7097/3845/7099/207/3611/4035/8890/4067/3553	10:Monocyte	1			EOPE	hsa03060	Protein export	28	-0.529493	-1.86304	0.000886955	0.00907513	0.00642248	1816	tags=50%, list=15%, signal=43%	6728/7917/7095/6449/60559/58477/10952/23478/29100/90701/6726/6727/9789/28972	8:Macrophage-1	3			Whole PE	R-HSA-163210	Formation of ATP by chemiosmotic coupling	16	0.677794	1.81735	0.00123622	0.0108869	0.00887577	4055	tags=81%, list=25%, signal=61%	515/10476/9551/509/521/539/514/516/10632/518/522/517/513	1:CTB	2
Whole PE	GO:0007034	vacuolar transport	148	0.335007	1.6194	0.000351359	0.01808	0.0156529	1799	tags=28%, list=13%, signal=24%	2896/55187/26985/9648/9146/5119/23230/757/23400/7251/8546/3916/55850/7805/84376/2580/79666/143187/4035/23585/51172/7415/91782/51542/57617/64145/9765/10254/57154/23163/10042/274/9525/55823/138050/79158/55275/23339/79643/30849/5071	10:Monocyte	1			EOPE	hsa04979	Cholesterol metabolism	33	-0.492944	-1.79315	0.00349114	0.0274636	0.019436	2313	tags=45%, list=19%, signal=37%	27141/4023/7417/3949/7419/114879/948/341/348/7416/10577/4043/706/3988/344	8:Macrophage-1	3			Whole PE	R-HSA-9772755	Formation of WDR5-containing histone-modifying complexes	37	-0.50506	-1.79029	0.00123136	0.0108869	0.00887577	2574	tags=41%, list=16%, signal=34%	51230/55689/23054/55683/58508/11168/55617/9070/8850/6871/22976/51105/259282/29915/4297	1:CTB	2
Whole PE	GO:0071542	dopaminergic neuron differentiation	16	0.691806	2.06178	0.000361065	0.0184526	0.0159754	1675	tags=50%, list=12%, signal=44%	7873/1454/1499/7474/22943/6259/8321/3091	10:Monocyte	1			EOPE	hsa03010	Ribosome	159	0.623218	3.01314	1e-10	1.18e-08	9.19298e-09	2283	tags=60%, list=18%, signal=50%	51065/6231/51258/6223/9349/4736/6132/6156/6144/6206/6233/6227/6146/11224/6141/6165/2197/6133/6201/6230/6232/6154/6169/65003/6171/6235/6209/6130/6207/6222/6168/6152/6139/6143/9045/6188/6128/6181/6204/6203/25873/6205/6136/6166/6202/6210/6122/6161/6228/6135/6147/7311/6193/6217/6229/6129/51121/6167/6234/6159/6194/55052/3921/6176/6142/6138/6155/6125/6218/54948/122704/51021/6158/9553/6124/6175/92259/61…	2:NK-cell	2			Whole PE	R-HSA-3371511	HSF1 activation	11	0.746995	1.81231	0.00131751	0.0113355	0.00924145	2176	tags=73%, list=13%, signal=63%	7531/1915/3326/3297/3281/3320/10728/7415	1:CTB	2
Whole PE	GO:0015850	organic hydroxy compound transport	180	0.327474	1.63778	0.000366587	0.0186115	0.0161131	2391	tags=29%, list=18%, signal=25%	9194/84925/23461/114885/6696/302/114134/10859/9123/158219/7110/23446/348/5305/4035/4790/84062/10227/10765/51542/5443/6804/3840/706/344/341/5825/19/135/4481/5045/6850/9525/18/6256/57655/55275/10577/134429/5071/6580/116150/366/114882/654/10928/1071/3990/8714/5468/9217/1601/3952	10:Monocyte	1			EOPE	hsa05020	Prion disease	207	0.376855	1.89369	4.17985e-07	2.11381e-05	1.6468e-05	1322	tags=25%, list=10%, signal=23%	10975/126328/514/1350/64837/4697/1339/10476/4696/581/1347/4713/9377/4726/4725/1351/5580/4684/5689/51079/9167/517/4718/522/5601/10213/1337/5621/506/5719/27089/4700/29796/5691/509/5530/7388/516/4709/4716/5705/4715/1965/1388/539/1345/5704/5688/7280/518/513/4695	2:NK-cell	2			Whole PE	R-HSA-70263	Gluconeogenesis	28	0.594345	1.84594	0.00162765	0.0139395	0.0113644	2986	tags=46%, list=18%, signal=38%	2821/219855/2597/1468/2023/92579/4191/2203/5223/4190/7167/2806/226	1:CTB	2
Whole PE	GO:0070199	establishment of protein localization to chromosome	22	-0.663728	-1.96731	0.000370728	0.0186308	0.0161297	1144	tags=41%, list=8%, signal=38%	10856/10574/23514/908/112869/10576/7203/10575/6950	10:Monocyte	1			EOPE	hsa05235	PD-L1 expression and PD-1 checkpoint pathway in cancer	79	-0.494657	-1.9701	1.40581e-05	0.000452416	0.000352462	2889	tags=44%, list=23%, signal=34%	5296/5777/3932/3725/1460/5595/3551/3717/4793/4794/4792/27040/208/114609/6774/5728/5781/5894/3716/7535/919/5133/5588/6198/4772/5603/3459/5533/5290/3458/915/940/1956/917/4773	2:NK-cell	2			Whole PE	R-HSA-76002	Platelet activation, signaling and aggregation	220	0.340262	1.48742	0.00180822	0.0153452	0.0125105	4339	tags=36%, list=27%, signal=27%	7277/5879/2788/6647/5155/2771/5478/2767/1191/387/5595/88/808/408/967/10487/5216/11343/22927/1607/388/998/7422/5590/2768/801/8407/7078/3481/11069/1608/2787/57406/948/4067/5919/55970/6464/2791/391/1521/805/221955/29789/146850/2335/8525/3959/1072/5627/1445/10257/23533/1277/5580/5579/6810/2783/226/7040/10235/10490/10681/7409/207/5321/87/1606/3690/7873/10411/7450/7057/1675/51706/5583/54331/5880/3309	1:CTB	2
Whole PE	GO:0007041	lysosomal transport	114	0.35577	1.63582	0.000378611	0.01885	0.0163195	2818	tags=41%, list=21%, signal=33%	2896/26985/9648/9146/5119/23400/7251/8546/3916/55850/7805/84376/2580/79666/4035/51172/7415/91782/51542/57617/64145/9765/23163/10042/274/9525/55823/138050/79158/55275/23339/79643/30849/5071/65082/6272/23295/5289/29082/9842/27072/1130/3988/55297/950/3482/128866	10:Monocyte	1			EOPE	hsa04932	Non-alcoholic fatty liver disease	129	0.380367	1.78857	6.51025e-05	0.00135566	0.00105615	1322	tags=26%, list=10%, signal=24%	10975/126328/1350/4697/1339/356/4696/581/1347/4713/9377/4726/4725/1351/51079/9167/6256/4718/5601/1337/27089/4700/7186/29796/7388/4709/4716/4715/1965/998/10018/1345/2353/4695	2:NK-cell	2			Whole PE	R-HSA-6809371	Formation of the cornified envelope	46	0.501793	1.73307	0.00203617	0.017124	0.0139607	2482	tags=30%, list=15%, signal=26%	144501/3856/3728/3875/7062/6768/3880/25984/3872/11187/5493/5652/5045/2125	1:CTB	2
Whole PE	GO:0097709	connective tissue replacement	9	0.813101	2.09128	0.000431646	0.0201018	0.0174033	2426	tags=89%, list=18%, signal=73%	9475/7040/861/5530/3552/3091/5468/6093	10:Monocyte	1			EOPE	hsa04260	Cardiac muscle contraction	46	0.510069	1.97713	8.55294e-05	0.00168208	0.00131045	1994	tags=43%, list=16%, signal=37%	10975/444/1350/1339/1347/9377/1351/9167/1337/27089/29796/7388/7170/1345/1340/1327/486/487/782/7171	2:NK-cell	2			Whole PE	R-HSA-174824	Plasma lipoprotein assembly, remodeling, and clearance	58	0.466871	1.68217	0.0020586	0.017235	0.0140511	1904	tags=28%, list=12%, signal=24%	10577/51129/51599/949/348/26119/7314/649/9388/3949/9619/7311/7316/1175/6233/1211	1:CTB	2
Whole PE	GO:1903170	negative regulation of calcium ion transmembrane transport	26	0.600625	2.02626	0.000428961	0.0201018	0.0174033	2180	tags=50%, list=16%, signal=42%	5311/9446/7009/91404/7531/7416/5530/5533/274/4923/808/5532/2859	10:Monocyte	1			EOPE	hsa05161	Hepatitis B	129	-0.384121	-1.64911	0.000462713	0.00682502	0.00531714	3125	tags=36%, list=25%, signal=28%	4775/3576/5599/5296/836/3725/1959/6778/7042/5595/3551/3717/1642/843/7419/1869/4792/10971/4214/51135/29110/208/114609/6774/6775/9134/1387/5609/3718/5894/3716/6776/54205/9586/5578/4772/5603/6885/7048/7043/5290/1385/7187/6777/4088/5579/4773	2:NK-cell	2			Whole PE	R-HSA-201681	TCF dependent signaling in response to WNT	153	0.368088	1.549	0.00279655	0.0230007	0.0187518	3056	tags=38%, list=19%, signal=31%	5692/5709/5685/5518/5710/10213/5713/7314/5717/7090/5700/5695/5682/5684/5690/5687/1454/9861/1460/5688/7474/5701/5691/9580/10197/5704/5686/5683/5721/5714/1455/5689/7311/7979/7316/4609/5693/5719/1855/5702/9978/6233/5705/8322/7089/6422/5694/123169/5720/283149/6659/4221/10524/83595/8607/5706/5516/440193	1:CTB	2
Whole PE	GO:0002726	positive regulation of T cell cytokine production	22	0.614389	2.00447	0.000423761	0.0201018	0.0174033	2663	tags=59%, list=20%, signal=48%	975/3105/3554/3569/114548/3606/163486/3553/6504/567/91543/7855/10892	10:Monocyte	1			EOPE	hsa04658	Th1 and Th2 cell differentiation	74	-0.444119	-1.7417	0.000637215	0.00835459	0.00650878	3161	tags=51%, list=25%, signal=39%	3594/4775/864/5599/3932/3725/6778/5595/3551/3127/3717/4793/9794/4794/4792/27040/3714/182/3119/6775/3718/3716/7535/919/6776/3595/5588/4772/5603/3459/30009/5533/3458/6777/915/917/4773/4094	2:NK-cell	2			Whole PE	R-HSA-1660499	Synthesis of PIPs at the plasma membrane	48	-0.4313	-1.6276	0.00283681	0.0231281	0.0188556	3300	tags=38%, list=20%, signal=30%	79837/5291/5295/23396/65977/5286/81846/8394/5867/84725/5290/59338/66036/3631/8395/8867/5728/55300	1:CTB	2
Whole PE	GO:1904851	positive regulation of establishment of protein localization to telomere	9	-0.804182	-1.86522	0.000417879	0.0201018	0.0174033	1144	tags=67%, list=8%, signal=61%	10574/908/10576/7203/10575/6950	10:Monocyte	1			EOPE	hsa05142	Chagas disease	82	-0.441284	-1.77942	0.000665934	0.00841931	0.0065592	3108	tags=44%, list=25%, signal=33%	712/2773/3576/5599/5296/3725/7042/5595/3551/811/4792/23236/51135/208/6352/5519/5520/5054/8837/6348/2778/7132/919/4087/5603/2774/7048/3459/55844/5330/7043/5290/3458/915/6349/917	2:NK-cell	2			Whole PE	R-HSA-195258	RHO GTPase Effectors	242	0.326319	1.44557	0.00304567	0.0246159	0.0200685	2793	tags=29%, list=17%, signal=24%	7277/5879/7531/1535/7280/9928/991/10381/5518/11113/387/5595/808/9212/7529/9055/8655/5216/10458/81929/11004/64946/1058/1063/995/7532/55839/388/998/332/5590/801/4637/84790/10094/91010/644150/7846/10726/64105/29941/29984/10383/83540/79023/103910/389/1855/391/114822/55143/10552/147841/1781/805/4085/5905/2810/701/4689/10109/6232/10093/1072/4221/1062/4638/5580/5579/55845	1:CTB	2
Whole PE	GO:0048753	pigment granule organization	36	0.521267	1.84997	0.000426379	0.0201018	0.0174033	1522	tags=31%, list=11%, signal=27%	9839/26985/2647/89781/8546/10981/348/84062/200576/3257/26258	10:Monocyte	1			EOPE	hsa04261	Adrenergic signaling in cardiomyocytes	95	-0.414327	-1.7051	0.000872821	0.0106544	0.00830052	1891	tags=26%, list=15%, signal=23%	805/208/784/5529/483/5519/493/5520/776/478/7169/6548/2778/23533/9586/5578/5603/55844/476/5330/1385/115/5527/154/490	2:NK-cell	2			Whole PE	R-HSA-9615710	Late endosomal microautophagy	32	0.538748	1.70613	0.00394188	0.031317	0.0255317	3880	tags=56%, list=24%, signal=43%	10226/128866/7314/55048/123/79720/7311/11315/7316/79643/6233/27243/89853/3312/51160/29082/51271/93343	1:CTB	2
Whole PE	GO:0030203	glycosaminoglycan metabolic process	79	0.402867	1.77387	0.000415069	0.0201018	0.0174033	2685	tags=35%, list=20%, signal=29%	960/9653/10678/6483/9957/6482/8509/7040/7358/4790/3553/9953/26229/10894/2517/1213/29940/6487/6484/92370/1910/54480/3340/2799/7130/2132/3161/51363	10:Monocyte	1			EOPE	hsa05140	Leishmaniasis	54	-0.45956	-1.70244	0.00234236	0.0236913	0.0184571	2886	tags=43%, list=23%, signal=33%	5777/3725/7042/5595/3127/3717/4793/4792/51135/2212/3689/3119/3716/1535/5603/2215/2214/6885/3459/7043/3458/3676/5579	2:NK-cell	2			Whole PE	R-HSA-2990846	SUMOylation	164	-0.317165	-1.48069	0.00406683	0.0321728	0.0262295	3003	tags=35%, list=18%, signal=29%	59348/1788/142/2033/7022/6045/9994/1107/25942/9656/23225/59343/6015/4306/9759/4286/286053/8648/23512/10054/6294/10499/28996/6095/7021/22955/53371/7486/2908/23165/5610/7428/57591/57122/10762/115426/7155/23314/9818/5903/80012/29843/10521/8204/648/79677/10274/8924/7068/2099/205564/7181/5465/23137/6304/6670/8554	1:CTB	2
Whole PE	GO:0071453	cellular response to oxygen levels	119	0.357996	1.6544	0.000432408	0.0201018	0.0174033	2503	tags=31%, list=18%, signal=26%	5291/28996/7009/665/5163/4193/1902/2023/9475/5034/664/7040/26608/207/867/51142/6714/9520/28984/10370/101/114990/7248/3091/10525/4000/10397/8996/4609/84890/7428/10449/5468/1386/3779/29904/468	10:Monocyte	1			EOPE	hsa04520	Adherens junction	82	-0.412029	-1.66146	0.00280162	0.0260993	0.0203331	1294	tags=23%, list=10%, signal=21%	81607/2064/1387/10398/10163/57154/6885/7048/2534/2260/6934/5797/10458/5908/5795/3480/4088/7525/1956	2:NK-cell	2			Whole PE	R-HSA-198933	Immunoregulatory interactions between a Lymphoid and a non-Lymphoid cell	85	0.401457	1.56247	0.00551182	0.0421745	0.0343835	6797	tags=55%, list=42%, signal=32%	567/946/1308/3383/29990/10219/56253/3689/3107/3385/1277/3821/8174/79465/56654/3106/22914/916/3384/80329/374383/3134/8778/9976/8519/1525/917/919/3683/3824/5817/3105/947/54209/131450/10666/5819/915/6402/57823/29992/11314/3695/718/126014/3903/1278	1:CTB	2
Whole PE	GO:0006022	aminoglycan metabolic process	86	0.389709	1.73184	0.000458037	0.0201981	0.0174867	2685	tags=34%, list=20%, signal=27%	960/9653/10678/6483/9957/6482/8509/7040/7358/4790/3553/9953/26229/10894/2517/1213/29940/6487/6484/92370/1910/54480/3340/2799/7130/9334/2132/3161/51363	10:Monocyte	1			EOPE	hsa04148	Efferocytosis	130	-0.353255	-1.51747	0.00327723	0.0282961	0.0220445	3447	tags=41%, list=27%, signal=30%	23355/389668/818/489/5468/50636/161291/1901/405/714/4775/712/5087/64284/5031/5777/836/196527/4953/9261/5595/3717/811/1847/1850/100133941/23339/5869/1788/23411/102/3693/84868/3988/2057/240/6868/5781/3685/7879/23166/23250/4772/9844/5603/10396/1399/384/1524/5747/1385/91937/4773	2:NK-cell	2			Whole PE	R-HSA-5663220	RHO GTPases Activate Formins	127	0.368688	1.51564	0.00679947	0.0493954	0.0402705	2361	tags=29%, list=14%, signal=25%	7277/5879/7280/991/10381/5518/387/9212/8655/5216/81929/11004/64946/1058/1063/55839/388/998/332/84790/91010/7846/10726/64105/29984/10383/83540/79023/389/1855/55143/147841/1781/4085/5905/701/6232	1:CTB	2
Whole PE	GO:0045137	development of primary sexual characteristics	150	0.329128	1.59498	0.000449274	0.0201981	0.0174867	1117	tags=19%, list=8%, signal=18%	1545/5872/2069/152006/10184/3622/25976/1495/3955/5926/8195/10409/92/7110/56729/6715/7042/867/6714/7474/23598/599/1602/8890/8204/10370/3552/7337/128637	10:Monocyte	1			EOPE	hsa04024	cAMP signaling pathway	121	-0.359421	-1.53606	0.00514228	0.0379244	0.0295456	1340	tags=20%, list=11%, signal=18%	493/776/478/1387/6548/5894/10398/2778/10846/9586/7434/4772/1081/476/5908/5290/1385/115/84876/2149/154/490/5144/5140	2:NK-cell	2			Whole PE	R-HSA-2990846	SUMOylation	165	-0.589051	-1.93728	1e-10	6.49643e-09	4.96241e-09	2899	tags=49%, list=19%, signal=40%	7181/7022/55746/79902/9883/9612/6790/28996/5468/23279/10054/142/10055/7508/7153/7175/1107/9212/1029/6015/3619/6117/6095/9631/115426/2033/4928/8648/6045/7518/7428/4286/648/59343/1655/2099/23225/5610/205564/80012/348995/7421/6294/79677/9126/5885/7155/23468/6996/165918/332/5903/4306/53371/8204/672/10762/9994/25942/23165/23137/7486/55143/641/10521/7068/10274/8021/29843/5465/23512/10499/9656/57122/667…	4:CTB-2	2
Whole PE	GO:0009150	purine ribonucleotide metabolic process	280	-0.33273	-1.51725	0.00045187	0.0201981	0.0174867	3129	tags=34%, list=23%, signal=27%	4708/5144/10965/4713/27284/84188/84836/10005/516/27115/4726/471/6391/9605/525/8034/2181/64087/3704/514/109/2639/136332/79877/506/11001/51024/8876/4701/4710/515/2773/196883/51292/55902/4725/6296/526/50808/498/5471/65018/785/55811/31/2618/5198/8622/54995/65220/4704/9551/64834/5164/4830/8801/32/522/4717/4731/4723/10632/8802/9524/4706/126328/60490/57673/4712/4707/9567/4705/113/521/517/6390/4695/84693…	10:Monocyte	1			EOPE	hsa05166	Human T-cell leukemia virus 1 infection	188	-0.321016	-1.4472	0.00623741	0.0450621	0.0351064	2754	tags=30%, list=22%, signal=24%	3932/3725/1959/7042/5595/3551/3127/811/51433/200186/64682/6908/3383/7419/29882/1869/4792/996/4214/208/7514/3689/5728/3600/3119/2005/4801/9134/6722/8379/1387/3718/2113/3716/291/7132/6776/472/9586/3683/4087/4772/7048/25847/5533/7043/5290/1385/6777/9020/115/915/5971/4088/917/4773	2:NK-cell	2			Whole PE	R-HSA-69278	Cell Cycle, Mitotic	471	-0.520404	-1.76592	1e-10	6.49643e-09	4.96241e-09	3284	tags=46%, list=21%, signal=37%	11004/5515/995/5000/22822/5862/8379/10540/1062/5928/55722/147841/378708/9798/5527/51433/387893/5501/10844/55746/5711/79902/114799/84962/3837/993/9883/6790/10376/79441/2305/11064/5985/157570/23397/5696/8556/23279/6249/5557/84296/7465/9918/93323/7153/7175/1459/9212/1029/91687/10426/9663/4331/3930/5347/23354/4751/3619/9134/1017/81930/80254/1783/10000/6117/1021/8317/5594/5427/64105/84515/84930/22981/…	4:CTB-2	2
Whole PE	GO:0042063	gliogenesis	225	0.292309	1.49827	0.000454814	0.0201981	0.0174867	978	tags=16%, list=7%, signal=16%	9839/7431/5728/4763/2896/56978/387/5583/5339/1902/1959/9948/5025/8613/2908/6237/5970/3569/7097/3845/7099/664/3398/7040/207/7042/3611/4035/6347/1499/22911/1880/57142/8890/4067/51542/3553	10:Monocyte	1			EOPE	hsa04933	AGE-RAGE signaling pathway in diabetic complications	81	-0.388015	-1.55713	0.00723846	0.0492772	0.0383902	3045	tags=38%, list=24%, signal=29%	3576/5581/5599/5296/836/3725/7042/5595/2335/3717/1284/3383/2308/23236/208/6774/5054/1282/6776/4087/5578/4772/7412/5603/7048/5330/7043/5290/6777/4088/5579	2:NK-cell	2			Whole PE	R-HSA-69620	Cell Cycle Checkpoints	249	-0.520339	-1.73873	1e-10	6.49643e-09	4.96241e-09	3284	tags=48%, list=21%, signal=38%	11004/5515/995/5000/8379/1062/147841/378708/116028/5527/51433/5501/55746/5711/79902/9025/993/5985/11200/5696/23279/6249/7465/9212/1029/91687/10971/5932/5347/3619/9134/51720/1017/81930/1783/545/6117/8317/64105/84515/348235/64682/4928/10111/1063/11130/8318/9184/8881/7533/55055/140735/4194/5884/9793/890/151648/9577/348995/4172/4999/79682/10403/472/81565/55388/9156/165918/332/80010/23332/5903/4361/55…	4:CTB-2	2
Whole PE	GO:0006417	regulation of translation	364	-0.320632	-1.4923	0.000460835	0.020206	0.0174935	2447	tags=27%, list=18%, signal=23%	116496/23016/4869/378884/8664/23367/27102/8667/8637/8550/285367/57409/29883/7124/5914/55024/170506/28969/84300/10128/64410/65018/26164/79828/1734/84305/6059/27335/4116/678/708/7866/6470/3192/23645/8663/51335/387921/253943/9933/6208/6154/6949/5591/92342/1656/1965/6125/23521/7555/23107/23321/1653/9148/25983/8518/115416/342977/55695/3315/7072/26135/28998/8864/10605/6169/1977/9451/79068/8892/6659/247…	10:Monocyte	1			EOPE	hsa04621	NOD-like receptor signaling pathway	129	0.44524	1.86784	1.20649e-05	0.000785521	0.000599653	4212	tags=57%, list=33%, signal=38%	4938/10628/9140/2920/4940/4792/3725/90550/3576/8767/59082/8737/3428/3320/4939/329/7124/6772/6352/4790/23118/3665/29110/9641/2921/10059/54822/330/3455/84557/140609/4615/3710/4793/3551/23710/55914/841/837/3716/7158/6885/5602/5586/4671/63940/51393/55072/199713/10010/84674/2635/148022/5970/3709/5595/10135/79671/7297/5594/81631/2633/10392/56919/5603/3553/3708/7187/7128/1535/643246/6773/9474	5:EVT	2			Whole PE	R-HSA-68886	M Phase	332	-0.498308	-1.68056	1e-10	6.49643e-09	4.96241e-09	3175	tags=44%, list=20%, signal=36%	5862/8379/10540/1062/55722/147841/378708/9798/5527/51433/387893/5501/10844/55746/5711/79902/3837/9883/10376/79441/11064/23397/5696/23279/6249/9918/93323/7175/1459/9212/91687/10426/9663/3930/5347/23354/4751/3619/81930/80254/1783/5594/64105/84930/22981/348235/64682/9631/4928/5925/10051/1063/11130/9184/8881/6418/7443/7444/26271/10806/55055/114791/23225/221496/140735/27436/9662/9793/23063/3842/151648…	4:CTB-2	2
Whole PE	GO:1905323	telomerase holoenzyme complex assembly	6	-0.881665	-1.80591	0.000476634	0.0207807	0.0179911	309	tags=83%, list=2%, signal=81%	545/10728/472/3320/3326	10:Monocyte	1			EOPE	hsa05164	Influenza A	116	0.440098	1.81725	3.17294e-05	0.00114602	0.00087485	2057	tags=33%, list=16%, signal=28%	3337/4938/7706/4940/64135/4792/4600/5610/3576/7098/4939/7124/6772/8795/6352/4599/842/402569/4790/3665/29110/9641/1021/10482/100529063/1965/3455/1387/3836/207/2033/4615/4928/4793/103/3551/578/7514	5:EVT	2			Whole PE	R-HSA-5685942	HDR through Homologous Recombination (HRR)	68	-0.650113	-2.00669	6.03492e-09	2.43945e-07	1.86341e-07	2985	tags=54%, list=19%, signal=44%	116028/5888/5889/146956/5985/5892/5932/545/6117/5427/7516/10111/5884/348654/51426/472/9156/80010/4361/672/79728/4683/7486/5890/23514/10714/641/5983/11073/10635/5981/83990/1111/5429/1763/580/675	4:CTB-2	2
Whole PE	GO:0010743	regulation of macrophage derived foam cell differentiation	22	0.612042	1.99681	0.000480641	0.0208377	0.0180404	2291	tags=50%, list=17%, signal=42%	3685/23461/5583/3606/4790/19/4481/5465/247/1071/5468	10:Monocyte	1			EOPE	hsa03050	Proteasome	44	-0.50471	-1.94965	0.00012947	0.00304686	0.00232592	3395	tags=50%, list=27%, signal=37%	5700/5715/5719/10213/5686/5707/10197/5692/7979/5710/5683/5693/5705/5709/5702/51371/9861/5690/5696/5701/5704/5708	5:EVT	2			Whole PE	R-HSA-450408	AUF1 (hnRNP D0) binds and destabilizes mRNA	54	0.605961	2.50476	9.61033e-09	3.80026e-07	2.90289e-07	2563	tags=65%, list=16%, signal=54%	5692/3315/7314/5710/10197/3304/5685/5694/5704/10213/5691/5689/5700/5695/5688/5682/5720/5684/5709/5683/7979/5687/6233/5705/5713/9861/3312/5714/5686/7316/5702/5690/5693/7311/5721	4:CTB-2	2
Whole PE	GO:1903532	positive regulation of secretion by cell	203	0.310356	1.5751	0.000504211	0.0215765	0.0186801	2660	tags=32%, list=20%, signal=26%	6281/4282/382/9146/23607/51762/399687/5724/3783/23400/6696/302/5025/7251/3916/7097/7110/7099/56729/7040/7042/3684/6385/51714/79971/84062/10059/28984/3553/10497/3552/6804/101/9545/135/6850/9525/2867/10307/18/4923/3091/6812/1385/4089/654/376267/5532/283/6558/84876/2266/134957/5468/9536/2268/1601/3952/114897/10015/8111/55691/2550/5781	10:Monocyte	1			EOPE	hsa05162	Measles	99	0.418886	1.69589	0.00047068	0.00977354	0.00746094	3031	tags=39%, list=24%, signal=30%	3310/4938/3304/4940/64135/4792/3725/4600/5610/4939/6772/4599/842/4790/23118/3665/29110/9641/1021/1965/3455/207/4615/4793/103/3551/578/9451/6774/915/841/3312/3716/25898/8667/6885/27113/3305/5602	5:EVT	2			Whole PE	R-HSA-1236974	ER-Phagosome pathway	81	0.499212	2.26224	1.08107e-08	4.09681e-07	3.12941e-07	2563	tags=51%, list=16%, signal=43%	5692/3105/567/8673/7314/5710/10197/5685/5694/5704/10213/5691/5689/5700/5695/5688/5682/5720/5684/5709/5683/7979/5687/6233/5705/5713/9861/5714/5686/23480/7316/3107/5702/3135/3106/5690/5693/29927/929/7311/5721	4:CTB-2	2
Whole PE	GO:0007249	canonical NF-kappaB signal transduction	248	0.285524	1.48141	0.000506072	0.0215765	0.0186801	1917	tags=25%, list=14%, signal=22%	3956/23291/23085/10318/51523/387/55870/5494/2597/10758/124583/1902/8772/57708/5495/9475/11214/5970/7097/399/64116/7099/29110/23390/3656/51026/11006/207/140885/79971/4790/1499/7474/7088/8454/329/171392/84270/84433/5971/92140/3553/23005/3552/10783/286827/684/54503/7128/113277/56658/79753/24138/7335/55072/4615/8945/6737/23476/5071/1910/56674/6772	10:Monocyte	1			EOPE	hsa04024	cAMP signaling pathway	126	0.39186	1.63996	0.0011617	0.014946	0.0114095	3031	tags=37%, list=24%, signal=28%	775/493/5143/4792/3725/818/1385/7410/5058/9475/91860/4790/1081/153/7074/7409/2770/109/1262/5139/9586/1387/207/5140/6548/51/6752/2033/108/112/4659/673/10451/134/8843/4772/5727/817/8310/5142/483/338442/488/115/4886/5602	5:EVT	2			Whole PE	R-HSA-8854050	FBXL7 down-regulates AURKA during mitotic entry and in early mitosis	53	0.588516	2.39638	3.11487e-08	1.08961e-06	8.32313e-07	2563	tags=66%, list=16%, signal=55%	5692/7314/5710/10197/5685/6500/5694/5704/10213/5691/5689/5700/5695/5688/5682/5720/5684/5709/80028/5683/7979/5687/6233/5705/5713/9861/5714/5686/9978/7316/5702/5690/5693/7311/5721	4:CTB-2	2
Whole PE	GO:0002704	negative regulation of leukocyte mediated immunity	55	0.448738	1.82202	0.000514193	0.0217576	0.0188368	1210	tags=31%, list=9%, signal=28%	613/3105/196/3133/27342/10859/5272/7040/3106/11006/3575/1378/8832/6504/2213/684/4092	10:Monocyte	1			EOPE	hsa04620	Toll-like receptor signaling pathway	70	0.428732	1.64145	0.00198005	0.0211806	0.0161689	4005	tags=53%, list=32%, signal=36%	4792/3725/3576/7098/1326/23643/8737/6696/7124/6772/6352/6348/4790/23118/3665/29110/9641/3455/207/4615/3551/1513/841/114609/3716/6885/5602/148022/5970/5595/7297/5594/5603/3553/8503/6351/7187	5:EVT	2			Whole PE	R-HSA-9762114	GSK3B and BTRC:CUL1-mediated-degradation of NFE2L2	51	0.590793	2.4408	3.2806e-08	1.12593e-06	8.60059e-07	2563	tags=67%, list=16%, signal=56%	5692/7314/5710/10197/5685/6500/5694/5704/10213/5691/5689/5700/5695/5688/5682/5720/5684/5709/5683/7979/5687/6233/5705/5713/9861/5714/5686/9978/7316/5702/5690/5693/7311/5721	4:CTB-2	2
Whole PE	GO:0048041	focal adhesion assembly	69	0.419587	1.76759	0.000521597	0.0217576	0.0188368	1747	tags=26%, list=13%, signal=23%	6281/5728/613/5795/387/79834/5879/23603/9475/7094/6385/6714/3987/342184/7248/1946/7070/5786	10:Monocyte	1			EOPE	hsa04068	FoxO signaling pathway	103	0.388232	1.58199	0.00221473	0.0229941	0.0175533	2442	tags=29%, list=19%, signal=24%	9140/10365/1030/1647/9133/4193/891/9456/3480/23411/6446/6648/1454/10769/1026/4616/10018/1387/207/6654/2033/1263/2309/673/3551/901/23710/6774/114907/4088	5:EVT	2			Whole PE	R-HSA-9604323	Negative regulation of NOTCH4 signaling	53	0.584122	2.37849	4.20076e-08	1.41503e-06	1.0809e-06	2563	tags=66%, list=16%, signal=55%	5692/7314/5710/10197/5685/6500/5694/5704/10213/5691/5689/5700/5695/5688/5682/5720/5684/5709/5683/7979/5687/4855/6233/5705/5713/9861/5714/5686/9978/7316/5702/5690/5693/7311/5721	4:CTB-2	2
Whole PE	GO:0001952	regulation of cell-matrix adhesion	93	0.389976	1.74491	0.000519585	0.0217576	0.0188368	1747	tags=26%, list=13%, signal=23%	5291/6281/5728/4763/5795/387/79834/5879/23603/9475/7094/6237/54453/6385/6714/3987/342184/10519/5328/7248/1605/1946/7070/5786	10:Monocyte	1			EOPE	hsa04657	IL-17 signaling pathway	60	0.446312	1.66348	0.00337955	0.0322427	0.0246135	1361	tags=27%, list=11%, signal=24%	2920/4792/3725/3576/2354/3320/29761/6280/7124/4790/23118/29110/9641/2921/3727/84818	5:EVT	2			Whole PE	R-HSA-4641258	Degradation of DVL	55	0.569536	2.3775	5.10436e-08	1.62892e-06	1.24428e-06	2563	tags=64%, list=16%, signal=53%	5692/7314/5710/10197/5685/5694/5704/10213/5691/5689/5700/5695/5688/5682/5720/5684/5709/5683/7979/5687/6233/5705/5713/9861/1855/5714/5686/9978/7316/5702/5690/1856/5693/7311/5721	4:CTB-2	2
Whole PE	GO:0008380	RNA splicing	393	-0.315618	-1.48083	0.00051683	0.0217576	0.0188368	2422	tags=25%, list=18%, signal=22%	4869/6883/10291/9913/494115/58517/9584/79074/3178/5411/9410/6314/55192/23091/91746/8148/117143/9984/9879/92906/10450/10419/10915/57703/6830/79005/3181/1665/4116/55094/51639/80324/51759/10283/29896/53938/51574/9360/1859/285672/8175/708/11319/4928/3192/6635/85437/3550/6207/51163/8563/9904/56943/79042/9343/2483/22889/84950/1653/6421/51637/79084/10659/8850/57819/7072/202559/26121/55544/6434/6636/1112…	10:Monocyte	1			EOPE	hsa01212	Fatty acid metabolism	49	-0.431816	-1.71908	0.00421404	0.0381424	0.0291172	1899	tags=35%, list=15%, signal=30%	60481/3033/51703/10449/1374/39/54898/31/9200/64834/5538/401494/6319/9524/9415/3992/2181	5:EVT	2			Whole PE	R-HSA-1236978	Cross-presentation of soluble exogenous antigens (endosomes)	46	0.610673	2.45477	7.06757e-08	2.20552e-06	1.68472e-06	2269	tags=61%, list=15%, signal=52%	5692/5710/10197/5685/5694/5704/10213/5691/5689/5700/5695/5688/5682/5720/5684/5709/5683/7979/5687/5705/5713/4360/9861/5714/5686/5702/5690/5693	4:CTB-2	2
Whole PE	GO:0051051	negative regulation of transport	298	0.281337	1.50301	0.000537528	0.0221824	0.0192045	2660	tags=30%, list=20%, signal=25%	5728/11252/5311/4763/3685/382/613/79890/3958/9446/7009/23327/8682/6672/5978/5879/302/91404/27342/10859/7531/8609/7097/124935/348/8898/51719/207/2048/140885/7416/55829/4790/8832/961/4946/5530/55917/5908/3553/11142/5533/7295/2213/706/10434/344/1595/341/2171/55022/5270/11261/274/9525/7175/2867/18/4923/8291/4947/91942/5071/90678/5592/808/5532/3638/7132/7779/2859/2887/51465/337867/91543/817/100/9474/3…	10:Monocyte	1			EOPE	hsa04936	Alcoholic liver disease	98	0.384472	1.5543	0.00439792	0.0388117	0.0296281	2001	tags=28%, list=16%, signal=23%	2920/4792/32/3576/29896/23643/4217/8737/23411/7124/4790/23118/712/29110/9641/2921/1375/84818/728/207/6932/51/4615/23175/2309/6434/3551	5:EVT	2			Whole PE	R-HSA-351202	Metabolism of polyamines	55	0.564067	2.35467	7.1537e-08	2.20552e-06	1.68472e-06	2563	tags=58%, list=16%, signal=49%	5692/5710/10197/5685/5694/5704/10213/113451/5691/5689/5700/5695/5688/5682/5720/1728/5684/5709/5683/7979/5687/5705/5713/9861/5714/5686/6723/5702/5690/5693/196743/5721	4:CTB-2	2
Whole PE	GO:0010632	regulation of epithelial cell migration	174	0.321975	1.59512	0.000543188	0.0222967	0.0193036	1166	tags=22%, list=9%, signal=20%	5291/5728/4763/5797/382/2896/2260/51094/387/6672/5879/8828/23603/5025/22846/8613/9475/6237/10000/7048/348/7040/811/54453/207/7042/6868/4233/6714/7474/23598/57142/28984/161742/10519/2821/394/659	10:Monocyte	1			EOPE	hsa05110	Vibrio cholerae infection	43	-0.435009	-1.67926	0.00487762	0.0391318	0.0298725	2481	tags=44%, list=20%, signal=36%	90423/5567/2778/10945/9114/526/3784/51382/527/23480/29927/9601/9550/10952/11015/60/8992/375/11014	5:EVT	2			Whole PE	R-HSA-9759194	Nuclear events mediated by NFE2L2	93	0.458834	2.17496	8.00144e-08	2.386e-06	1.82259e-06	2310	tags=51%, list=15%, signal=43%	6888/374/5692/3162/5052/7314/5710/10197/140809/5685/7295/6500/5694/5704/10213/5691/5689/5700/5695/5688/7086/5682/5720/1728/5684/5709/23657/2940/5683/7979/10061/5687/8878/6233/5705/5713/9861/5714/5686/4609/6649/9978/7316/5702/5690/5693/5226	4:CTB-2	2
Whole PE	GO:0090287	regulation of cellular response to growth factor stimulus	205	0.301638	1.53407	0.000552646	0.0225649	0.0195358	1567	tags=20%, list=12%, signal=18%	5291/28996/967/9839/860/25942/2260/3622/9146/5494/5926/79595/2022/51341/7040/23390/5654/3611/6868/10755/1499/7474/23770/23625/161742/3553/4221/10370/27020/57154/3678/22943/4092/64855/114990/135228/26524/8321/5770/51496	10:Monocyte	1			EOPE	hsa04658	Th1 and Th2 cell differentiation	65	0.424954	1.61008	0.0052243	0.0409818	0.0312847	4245	tags=60%, list=34%, signal=40%	4792/919/3725/182/6772/4790/6775/5532/5530/3566/9794/4793/3551/4094/915/4794/4773/4772/4851/3716/84441/3119/5602/3714/27040/5970/5595/5533/3516/3113/3122/7297/5594/917/5603/4775/7535/6778/55534	5:EVT	2			Whole PE	R-HSA-195258	RHO GTPase Effectors	243	-0.480834	-1.6073	9.81489e-08	2.87956e-06	2.1996e-06	3397	tags=43%, list=22%, signal=34%	3831/151246/2017/5170/11004/5515/808/94274/995/286205/8379/1062/147841/378708/51466/5527/5501/8976/1857/55746/79902/10376/23279/6249/23081/9212/91687/10971/5347/3619/81930/57120/1783/26999/5594/64105/8936/348235/4928/11113/128239/23380/1063/8826/4628/11130/9184/7533/55055/140735/6093/81624/9793/151648/5500/348995/5062/1432/3895/91010/79682/10403/81565/332/23332/5903/3799/5529/5048/11243/83540/234…	4:CTB-2	2
Whole PE	GO:0002183	cytoplasmic translational initiation	35	-0.563892	-1.89126	0.000564202	0.0228393	0.0197733	2389	tags=43%, list=18%, signal=35%	8664/8667/57409/27335/1939/51386/8663/8669/23521/8665/10480/2475/440275/7884/3646	10:Monocyte	1			EOPE	hsa04310	Wnt signaling pathway	124	0.367941	1.53579	0.00569825	0.0427975	0.0326708	3031	tags=37%, list=24%, signal=28%	7088/3725/2487/1488/818/7090/1501/23411/6477/5467/56998/9475/23401/7482/1454/5532/4609/5530/7483/4041/27130/1387/57680/27101/6932/2033/10023/8945/7091/5663/5582/4773/440193/4772/4919/54361/4088/817/54894/7472/7474/6422/6885/11211/7481/5602	5:EVT	2			Whole PE	R-HSA-180585	Vif-mediated degradation of APOBEC3G	52	0.56825	2.29596	1.05848e-07	3.0084e-06	2.29802e-06	2563	tags=65%, list=16%, signal=55%	5692/7314/5710/10197/5685/5694/5704/10213/5691/5689/5700/6923/5695/5688/5682/5720/5684/5709/5683/7979/5687/6233/5705/5713/9861/5714/5686/9978/7316/5702/5690/5693/7311/5721	4:CTB-2	2
Whole PE	GO:0016073	snRNA metabolic process	52	-0.502677	-1.80188	0.000591557	0.0234501	0.0203021	945	tags=33%, list=7%, signal=31%	57508/79650/23016/84186/51574/65123/55651/55174/92105/54862/84524/79664/25896/26173/8178/26512/10208	10:Monocyte	1			EOPE	hsa04657	IL-17 signaling pathway	63	-0.669964	-2.56028	1e-10	3.53e-08	2.67368e-08	1008	tags=37%, list=8%, signal=34%	8717/2353/7186/3725/5602/3727/1051/3569/6347/2354/9618/3627/5596/4790/6374/2920/2921/2919/3576/8061/1440/4792/7128	6:Decidual	2			Whole PE	R-HSA-211733	Regulation of activated PAK-2p34 by proteasome mediated degradation	48	0.594889	2.44052	1.39449e-07	3.8433e-06	2.93577e-06	2563	tags=67%, list=16%, signal=56%	5692/7314/5710/10197/5685/5694/5704/10213/5691/5689/5700/5695/5688/5682/5720/5684/5709/5683/7979/5687/6233/5705/5713/9861/5714/5686/7316/5702/5690/5693/7311/5721	4:CTB-2	2
Whole PE	GO:0034446	substrate adhesion-dependent cell spreading	82	0.3959	1.75419	0.000592559	0.0234501	0.0203021	2379	tags=34%, list=18%, signal=28%	6281/3685/387/9404/79834/5879/23603/10109/5034/811/3915/3611/6714/3987/83706/10519/10461/79778/1946/9928/91663/998/2241/4241/5829/2266/2335/1601	10:Monocyte	1			EOPE	hsa04620	Toll-like receptor signaling pathway	76	-0.487218	-1.91697	3.61463e-05	0.00141774	0.00107382	1738	tags=33%, list=14%, signal=29%	5604/6349/3716/5603/353376/10379/7124/7098/5290/2353/3725/207/10000/5602/3569/1513/5606/958/1326/148022/3627/4790/6352/3576/4792	6:Decidual	2			Whole PE	R-HSA-75815	Ubiquitin-dependent degradation of Cyclin D	50	0.5818	2.41294	1.78023e-07	4.5609e-06	3.48392e-06	2563	tags=64%, list=16%, signal=54%	5692/7314/5710/10197/5685/5694/5704/10213/5691/5689/5700/5695/5688/5682/5720/5684/5709/5683/7979/5687/6233/5705/5713/9861/5714/5686/7316/5702/5690/5693/7311/5721	4:CTB-2	2
Whole PE	GO:0035743	CD4-positive, alpha-beta T cell cytokine production	14	0.717563	2.08323	0.000617217	0.0240474	0.0208192	1085	tags=57%, list=8%, signal=53%	975/3554/3569/114548/3606/163486/3553/6504	10:Monocyte	1			EOPE	hsa04510	Focal adhesion	160	-0.391866	-1.74833	8.67206e-05	0.00278294	0.00210785	765	tags=17%, list=6%, signal=16%	3725/207/3688/10000/3908/5602/7423/858/2012/1282/3678/7148/7057/7414/87/857/3685/7424/1284/3371/3912/1278/4638/1292/894/1291/3479	6:Decidual	2			Whole PE	R-HSA-180534	Vpu mediated degradation of CD4	50	0.579345	2.40276	2.05889e-07	5.18683e-06	3.96205e-06	2563	tags=66%, list=16%, signal=55%	5692/7314/5710/10197/5685/6500/5694/5704/10213/5691/5689/5700/5695/5688/5682/5720/5684/5709/5683/7979/5687/6233/5705/5713/9861/5714/5686/7316/5702/5690/5693/7311/5721	4:CTB-2	2
Whole PE	GO:0048048	embryonic eye morphogenesis	20	0.631343	2.00016	0.000614052	0.0240474	0.0208192	1021	tags=30%, list=8%, signal=28%	28996/6670/5916/65979/7474/10370	10:Monocyte	1			EOPE	hsa04621	NOD-like receptor signaling pathway	134	-0.414142	-1.7928	0.000110728	0.00300668	0.00227731	1748	tags=25%, list=14%, signal=21%	3428/329/3716/5603/115361/4938/3320/10379/81631/834/7124/10392/7186/7205/3725/5602/3569/114769/2634/6347/148022/4790/10135/6352/2920/2921/8767/2635/2633/2919/3576/4792/7128	6:Decidual	2			Whole PE	R-HSA-8852276	The role of GTSE1 in G2/M progression after G2 checkpoint	69	0.499998	2.22032	2.08158e-07	5.18683e-06	3.96205e-06	2269	tags=54%, list=15%, signal=46%	5692/3326/7314/5710/7280/10197/7277/5685/5694/5704/10213/5691/5689/5700/5695/5688/5682/5720/5684/5709/5683/7979/5687/6233/5705/5713/9861/10381/3320/5714/5686/7846/10383/7316/5702/5690/5693	4:CTB-2	2
Whole PE	GO:0014074	response to purine-containing compound	100	0.368173	1.6655	0.000620116	0.0240474	0.0208192	1470	tags=23%, list=11%, signal=21%	54434/1545/5311/2889/196/24145/5724/5025/23028/5970/6715/55151/7056/7184/83606/329/5908/3553/2203/9693/135/1811/3488	10:Monocyte	1			EOPE	hsa05164	Influenza A	121	-0.408783	-1.74085	0.000135201	0.00315018	0.002386	2004	tags=31%, list=16%, signal=27%	3552/355/3459/1965/90865/3337/637/5604/3716/3113/4938/7132/10379/1019/4599/834/29107/7124/54205/8717/7098/5290/3838/207/3460/10000/581/3569/3123/6347/9021/148022/3627/4790/6352/3383/3576/4792	6:Decidual	2			Whole PE	R-HSA-5663220	RHO GTPases Activate Formins	128	-0.540719	-1.75678	2.36768e-07	5.82001e-06	4.44571e-06	3361	tags=52%, list=22%, signal=41%	151246/11004/5515/286205/8379/1062/147841/378708/51466/5527/5501/1857/55746/79902/10376/23279/6249/9212/91687/5347/3619/81930/1783/64105/348235/4928/23380/1063/11130/9184/55055/140735/81624/9793/151648/348995/91010/79682/10403/81565/332/23332/5903/5529/5048/11243/83540/23421/7514/23122/4085/57082/701/55143/54908/699/79980/57551/1060/79172/57122/3688/25909/9735/3796/401541	4:CTB-2	2
Whole PE	GO:0051961	negative regulation of nervous system development	95	0.380958	1.7126	0.000636989	0.0245782	0.0212788	1936	tags=31%, list=14%, signal=26%	5728/4763/1495/5978/6696/3569/7097/10512/84376/2048/7533/1499/7474/8408/57142/5530/3553/10501/22943/706/57609/6259/9693/10507/9682/7070/64689/567/9856	10:Monocyte	1			EOPE	hsa05202	Transcriptional misregulation in cancer	126	-0.397857	-1.71301	0.000418418	0.00752166	0.00569704	1694	tags=26%, list=13%, signal=23%	329/3207/5328/3206/1655/4914/861/5327/8013/7185/5087/2120/597/10912/581/1051/3569/4300/5966/1991/4616/958/604/1026/4790/51274/466/1647/4609/64332/894/3576/3479	6:Decidual	2			Whole PE	R-HSA-350562	Regulation of ornithine decarboxylase (ODC)	49	0.574762	2.35467	2.77312e-07	6.63723e-06	5.06996e-06	2269	tags=57%, list=15%, signal=49%	5692/5710/10197/5685/5694/5704/10213/5691/5689/5700/5695/5688/5682/5720/1728/5684/5709/5683/7979/5687/5705/5713/9861/5714/5686/5702/5690/5693	4:CTB-2	2
Whole PE	GO:0016266	O-glycan processing	31	0.551385	1.91947	0.000656198	0.0250687	0.0217034	3116	tags=52%, list=23%, signal=40%	2589/27090/10678/6483/6482/63917/10610/152002/6487/6484/9334/8693/56913/79695/55568/374907	10:Monocyte	1			EOPE	hsa05235	PD-L1 expression and PD-1 checkpoint pathway in cancer	75	-0.44301	-1.74062	0.00057779	0.00927091	0.00702195	1916	tags=28%, list=15%, signal=24%	3459/5604/4772/3716/920/5603/353376/3265/5290/2353/3725/207/3460/10000/4773/5606/4794/148022/4790/3091/4792	6:Decidual	2			Whole PE	R-HSA-5362768	Hh mutants are degraded by ERAD	53	0.558106	2.27255	2.85381e-07	6.74166e-06	5.14973e-06	2563	tags=60%, list=16%, signal=51%	5692/7314/5710/10197/5685/5694/5704/10213/5691/5689/5700/5695/5688/5682/5720/5684/5709/5683/7979/5687/6233/5705/5713/9861/5714/5686/7316/5702/5690/5693/7311/5721	4:CTB-2	2
Whole PE	GO:0010498	proteasomal protein catabolic process	461	0.241459	1.33773	0.000663267	0.0252139	0.0218292	2742	tags=32%, list=20%, signal=26%	117584/23291/6400/3093/5717/11345/23327/11011/821/127544/344558/64326/4193/5687/9683/8975/84937/9491/996/7353/23197/7110/10952/55968/223082/348/811/79089/207/116138/51035/1454/5707/23753/6047/9325/55666/10755/7415/255488/55829/26224/7184/1499/26133/55101/8454/329/5886/29945/2768/79016/7126/81502/9373/84961/57154/130617/9112/7337/5708/554251/4092/246184/57095/201595/6500/83892/80176/25793/26263/10…	10:Monocyte	1			EOPE	hsa04933	AGE-RAGE signaling pathway in diabetic complications	91	-0.437999	-1.78791	0.000829755	0.0126803	0.00960432	2405	tags=37%, list=19%, signal=31%	4313/595/1027/5601/50507/3552/2308/4772/5603/7043/3265/5292/1019/7042/7124/5290/3725/1958/207/10000/5602/581/3569/7423/6347/1282/4790/1281/7412/7424/1284/1278/3383/3576	6:Decidual	2			Whole PE	R-HSA-1236975	Antigen processing-Cross presentation	94	0.441491	2.11388	3.34001e-07	7.69047e-06	5.87449e-06	2890	tags=49%, list=19%, signal=40%	5692/3105/567/8673/7314/5710/10197/5685/5694/5704/10213/5691/5689/5700/5695/5688/5682/5720/5684/5709/5683/7979/5687/6233/5705/5713/4360/9861/5714/5686/23480/7316/3107/5702/3135/3106/5690/5693/29927/929/7311/5721/1535/4688/6280/5701	4:CTB-2	2
Whole PE	GO:0006620	post-translational protein targeting to endoplasmic reticulum membrane	14	0.713171	2.07048	0.000675998	0.0254472	0.0220311	2910	tags=71%, list=21%, signal=56%	23480/11231/29927/55176/10952/54557/29082/128866/7917/3309	10:Monocyte	1			EOPE	hsa05110	Vibrio cholerae infection	45	0.490822	1.75246	0.00119862	0.0151111	0.0114455	1804	tags=31%, list=14%, signal=27%	109/533/527/5567/29927/534/23480/535/10312/529/523/55176/2778/115	6:Decidual	2			Whole PE	R-HSA-9824272	Somitogenesis	52	0.549448	2.21999	3.5199e-07	8.00337e-06	6.11351e-06	2269	tags=54%, list=15%, signal=46%	5692/2043/5710/10197/5685/5694/5704/10213/5691/5689/5700/5695/5688/5682/5720/5684/5709/5683/7979/5687/5705/5713/9861/5714/5686/5702/5690/5693	4:CTB-2	2
Whole PE	GO:0014911	positive regulation of smooth muscle cell migration	31	0.544365	1.89503	0.000719904	0.0269685	0.0233481	1470	tags=32%, list=11%, signal=29%	54434/9732/1545/4193/1902/7099/85440/6714/6282/3488	10:Monocyte	1			EOPE	hsa05166	Human T-cell leukemia virus 1 infection	186	-0.337207	-1.53098	0.00116763	0.0151111	0.0114455	1738	tags=25%, list=14%, signal=22%	5604/4772/3716/920/10488/3113/7132/7043/64764/3265/23373/1019/7042/112/9020/7124/1739/8697/4487/2648/4801/9586/5290/2353/25906/246184/3725/1958/207/8829/10000/5602/581/3569/3123/4773/4316/5971/958/1026/7538/4790/4609/3383/894/8061/4792	6:Decidual	2			Whole PE	R-HSA-4608870	Asymmetric localization of PCP proteins	61	0.508317	2.16434	7.37609e-07	1.59728e-05	1.22011e-05	2912	tags=59%, list=19%, signal=48%	5692/7314/5710/10197/5685/5694/5704/10213/5691/5689/5700/5695/5688/5682/5720/5684/5709/5683/7979/5687/6233/5705/5713/9861/5714/5686/7316/5702/5690/1856/5693/7311/5721/8322/5701/8324	4:CTB-2	2
Whole PE	GO:0070200	establishment of protein localization to telomere	16	-0.684528	-1.88689	0.000737245	0.0273525	0.0236806	1144	tags=38%, list=8%, signal=34%	10574/908/10576/7203/10575/6950	10:Monocyte	1			EOPE	hsa05142	Chagas disease	83	-0.400314	-1.59509	0.00205336	0.0226512	0.0171564	1989	tags=30%, list=16%, signal=26%	355/3459/1636/6349/5603/7132/7043/7042/712/7124/5290/2353/3725/207/5516/3460/10000/5602/3569/6347/148022/4790/6352/3576/4792	6:Decidual	2			Whole PE	R-HSA-5668541	TNFR2 non-canonical NF-kB pathway	90	0.42308	2.0609	9.38699e-07	2.00882e-05	1.53447e-05	2563	tags=46%, list=16%, signal=38%	5692/5971/7314/5710/4055/8744/10197/5685/6500/5694/5704/10213/5691/7132/5689/5700/5695/5688/5682/5720/5684/5709/330/5683/7979/5687/6233/5705/4791/5713/9861/5714/5686/7316/5702/5690/5693/8792/9040/7311/5721	4:CTB-2	2
Whole PE	GO:0048593	camera-type eye morphogenesis	81	0.393048	1.73801	0.000737212	0.0273525	0.0236806	2527	tags=33%, list=19%, signal=27%	28996/6670/4763/5797/3150/639/84879/2048/10152/65979/1499/7474/10370/128637/113246/6015/7482/3091/7070/1296/23424/7428/578/2047/10220/468/7855	10:Monocyte	1			EOPE	hsa05162	Measles	102	-0.387738	-1.60793	0.00258334	0.0253311	0.0191862	2408	tags=31%, list=19%, signal=26%	572/595/1027/3455/27113/5601/3552/355/1965/637/3716/4938/10379/1019/4599/54205/8717/5290/2353/3312/3725/207/10000/5602/581/3569/4790/3303/3304/894/4792/7128	6:Decidual	2			Whole PE	R-HSA-2555396	Mitotic Metaphase and Anaphase	218	-0.473083	-1.57825	1.05243e-06	2.22602e-05	1.70038e-05	3284	tags=43%, list=21%, signal=34%	11004/5515/8379/1062/147841/378708/9798/5527/51433/5501/55746/5711/79902/3837/9883/10376/5696/23279/6249/9212/91687/3930/5347/3619/81930/1783/64105/348235/64682/9631/4928/1063/11130/9184/8881/7443/7444/26271/55055/221496/140735/9793/23063/3842/151648/348995/9126/5885/79682/10403/81565/332/23332/5903/23244/5529/5048/53371/11243/23592/83540/23421/23165/7514/23122/4085/57082/113130/701/983/55143/996…	4:CTB-2	2
Whole PE	GO:0050767	regulation of neurogenesis	253	0.278979	1.44605	0.000754125	0.0278449	0.0241069	1726	tags=21%, list=13%, signal=19%	6281/5728/4763/3688/5583/1495/1982/5978/6696/1959/302/23028/23654/5970/3569/7097/10512/3845/84376/3398/7040/2048/85440/7533/55636/1499/7474/118813/8408/57142/5530/23394/4067/3553/27020/57154/10501/659/706/57609/6259/9693/5270/1605/57698/274/1946/5605/10507/9682/11344/3091/7070/64689	10:Monocyte	1			EOPE	hsa04936	Alcoholic liver disease	105	-0.387521	-1.62011	0.00288247	0.0268682	0.0203504	2039	tags=28%, list=16%, signal=23%	50507/355/2308/5571/23417/5603/7132/128/9020/712/7124/8717/2309/717/207/10000/5602/3569/6319/5606/217/148022/4790/32/2920/2921/2919/3576/4792	6:Decidual	2			Whole PE	R-HSA-5607761	Dectin-1 mediated noncanonical NF-kB signaling	58	0.512116	2.19234	1.24443e-06	2.57407e-05	1.96624e-05	2563	tags=62%, list=16%, signal=52%	5692/5971/7314/5710/10197/5685/6500/5694/5704/10213/5691/5689/5700/5695/5688/5682/5720/5684/5709/5683/7979/5687/6233/5705/4791/5713/9861/5714/5686/7316/5702/5690/5693/9040/7311/5721	4:CTB-2	2
Whole PE	GO:0030855	epithelial cell differentiation	418	0.252533	1.39518	0.000771279	0.0282129	0.0244255	2625	tags=27%, list=19%, signal=23%	7431/37/2317/5872/2069/613/2889/387/3958/5583/5339/1200/1687/5926/6494/9414/7251/5916/2683/9475/10409/8609/3845/639/3398/7040/203068/55151/7849/207/83605/7416/4233/10152/6714/1499/7474/5530/5908/10765/694/161742/3553/54472/3552/26051/128637/659/23022/6598/9693/118/8826/6777/10116/9497/54206/230/135228/26524/9788/80781/4048/8321/2137/310/7716/59/3091/91663/4615/81537/5175/1385/8407/998/9935/4089/1…	10:Monocyte	1			EOPE	hsa04070	Phosphatidylinositol signaling system	79	0.40095	1.60572	0.00328224	0.0275902	0.0208973	2561	tags=32%, list=20%, signal=25%	5333/3705/23236/8527/8396/3632/23262/117283/3708/9110/808/23396/253430/55361/8525/64419/5286/51196/8867/8760/8503/1606/56623/805/113026	6:Decidual	2			Whole PE	R-HSA-5387390	Hh mutants abrogate ligand secretion	55	0.521429	2.17668	1.31216e-06	2.68181e-05	2.04855e-05	2563	tags=58%, list=16%, signal=49%	5692/7314/5710/10197/5685/5694/5704/10213/5691/5689/5700/5695/5688/5682/5720/5684/5709/5683/7979/5687/6233/5705/5713/9861/5714/5686/7316/5702/5690/5693/7311/5721	4:CTB-2	2
Whole PE	GO:0045596	negative regulation of cell differentiation	434	0.248219	1.36861	0.000782979	0.0285012	0.0246751	2623	tags=28%, list=19%, signal=23%	5728/4763/3688/3685/2069/51094/10011/23461/1495/7204/6648/5978/123169/6696/5916/10859/8036/3569/10512/51043/3845/7099/84376/6461/3398/7040/811/11006/7042/359845/2048/861/51621/3606/7533/1499/7474/1378/8408/57142/5530/171392/4067/161742/3553/4221/10519/3552/10501/659/2213/22943/706/4092/57609/25793/6259/9693/114990/6777/8848/714/19/3488/4854/10507/2137/6760/9682/5594/54949/205717/7070/10401/64689/…	10:Monocyte	1			EOPE	hsa04068	FoxO signaling pathway	108	-0.3717	-1.56561	0.00383004	0.0300446	0.0227563	1812	tags=30%, list=14%, signal=26%	3575/5571/5604/891/5603/7874/7043/3265/1901/7042/673/10365/5934/9454/5290/2309/1032/3276/114907/207/10912/10000/1263/5602/3569/4616/604/1026/6648/1647/894/3479	6:Decidual	2			Whole PE	R-HSA-349425	Autodegradation of the E3 ubiquitin ligase COP1	50	0.545868	2.26392	1.46154e-06	2.95392e-05	2.2564e-05	2563	tags=64%, list=16%, signal=54%	5692/7314/5710/10197/5685/5694/5704/10213/5691/5689/5700/5695/5688/5682/5720/5684/5709/5683/7979/5687/6233/5705/5713/9861/5714/5686/7316/5702/5690/5693/7311/5721	4:CTB-2	2
Whole PE	GO:0071320	cellular response to cAMP	34	0.540022	1.89087	0.000789493	0.0286034	0.0247636	1470	tags=35%, list=11%, signal=32%	1545/5311/2889/196/5724/23028/6715/5908/2203/9693/1811/3488	10:Monocyte	1			EOPE	hsa00562	Inositol phosphate metabolism	63	0.420463	1.61137	0.00412791	0.0314227	0.0238001	1562	tags=27%, list=12%, signal=24%	5333/3705/23236/9896/8396/51763/3632/23262/117283/9110/23396/253430/138429/55361/64419/5286/51196	6:Decidual	2			Whole PE	R-HSA-174113	SCF-beta-TrCP mediated degradation of Emi1	53	0.532562	2.16854	1.52772e-06	3.02057e-05	2.30731e-05	2563	tags=62%, list=16%, signal=52%	5692/7314/5710/10197/5685/6500/5694/5704/10213/5691/5689/5700/5695/5688/5682/5720/5684/5709/5683/7979/5687/6233/5705/5713/9861/5714/5686/7316/5702/5690/5693/7311/5721	4:CTB-2	2
Whole PE	GO:0071456	cellular response to hypoxia	99	0.362019	1.63872	0.000800264	0.0288581	0.0249841	2475	tags=31%, list=18%, signal=26%	5291/28996/7009/665/5163/4193/2023/9475/5034/664/7040/26608/51142/6714/9520/28984/10370/101/114990/3091/10525/4000/10397/8996/4609/84890/7428/10449/5468/1386/3779	10:Monocyte	1			EOPE	hsa05161	Hepatitis B	131	-0.344927	-1.48135	0.00418376	0.0314227	0.0238001	1753	tags=24%, list=14%, signal=21%	637/5604/4772/3716/10488/5603/353376/7043/64764/3265/7042/673/7124/54205/9586/7098/5290/2353/3725/207/10000/5602/581/3569/4773/5606/1026/148022/4790/4609/3576/4792	6:Decidual	2			Whole PE	R-HSA-169911	Regulation of Apoptosis	51	0.532329	2.19926	1.58333e-06	3.09686e-05	2.36559e-05	2563	tags=63%, list=16%, signal=53%	5692/7314/5710/10197/5685/5694/5704/10213/5691/5689/5700/5695/5688/5682/5720/5684/5709/5683/7979/5687/6233/5705/5713/9861/5714/5686/7316/5702/5690/5693/7311/5721	4:CTB-2	2
Whole PE	GO:0048844	artery morphogenesis	47	0.464964	1.81534	0.000812605	0.0291668	0.0252514	1495	tags=28%, list=11%, signal=25%	5311/4763/2022/639/10000/7048/348/7042/4035/55636/10370/4092/4854	10:Monocyte	1			EOPE	hsa03010	Ribosome	159	-0.752181	-3.70096	1e-10	3.21818e-09	2.27751e-09	1209	tags=65%, list=10%, signal=59%	51073/6152/51187/56945/79590/60488/6175/64979/28977/6181/6144/64963/51258/6169/84545/6227/740/10399/51081/64981/6132/51264/7311/124995/6133/6161/6157/6204/6218/6182/6223/6232/11224/6176/51650/6139/6228/6130/6137/6154/6167/6235/6230/6193/6155/9553/6206/6217/6156/6135/3921/6229/2197/6129/51121/6124/6207/6128/6188/6203/6165/6171/128308/6210/6146/65993/6125/64432/64976/6143/6136/63875/6168/6233/6147/…	8:Macrophage-1	2			Whole PE	R-HSA-69601	Ubiquitin Mediated Degradation of Phosphorylated Cdc25A	50	0.540513	2.24171	1.83393e-06	3.47491e-05	2.65437e-05	2563	tags=64%, list=16%, signal=54%	5692/7314/5710/10197/5685/5694/5704/10213/5691/5689/5700/5695/5688/5682/5720/5684/5709/5683/7979/5687/6233/5705/5713/9861/5714/5686/7316/5702/5690/5693/7311/5721	4:CTB-2	2
Whole PE	GO:0048732	gland development	299	0.272389	1.44954	0.000817358	0.0292016	0.0252815	1944	tags=22%, list=14%, signal=19%	28996/6670/1545/3720/5311/4763/382/55870/9612/11231/6648/8772/5916/2908/5970/3569/10512/51043/9821/7048/3398/6715/7040/51733/7849/207/7042/4233/79971/6714/4790/1499/7474/83606/57142/5894/10765/2356/10370/55727/7337/394/706/6598/1459/5270/6777/10116/1605/7128/3488/90780/5605/5594/3091/3082/675/6426/38/8945/1385/9935/4089/247/1956	10:Monocyte	1			EOPE	hsa04932	Non-alcoholic fatty liver disease	128	-0.51204	-2.40289	1e-10	3.21818e-09	2.27751e-09	2058	tags=43%, list=17%, signal=36%	4710/4726/9021/4723/581/4717/4728/5296/4725/7124/4731/7386/4702/3552/10018/1345/54205/4695/4701/4707/29796/208/126328/55967/4716/6389/9167/4722/4713/51079/4697/7381/6945/1347/9377/1351/4715/1965/1337/4709/1537/4714/1050/1327/4711/1340/10975/374291/1329/4700/3553/7388/6392/1350/4708	8:Macrophage-1	2			Whole PE	R-HSA-69610	p53-Independent DNA Damage Response	50	0.540513	2.24171	1.83393e-06	3.47491e-05	2.65437e-05	2563	tags=64%, list=16%, signal=54%	5692/7314/5710/10197/5685/5694/5704/10213/5691/5689/5700/5695/5688/5682/5720/5684/5709/5683/7979/5687/6233/5705/5713/9861/5714/5686/7316/5702/5690/5693/7311/5721	4:CTB-2	2
Whole PE	GO:0051047	positive regulation of secretion	214	0.300442	1.54234	0.000833347	0.029365	0.025423	2660	tags=31%, list=20%, signal=26%	6281/4282/382/9146/23607/51762/399687/5724/3783/23400/6696/302/5025/7251/3916/7097/7110/7099/56729/7040/7042/3684/6385/51714/79971/84062/10059/5530/28984/3553/10497/3552/6804/101/1535/9545/135/6850/9525/2867/10307/18/4923/3091/6812/1385/4089/654/376267/5532/283/6558/84876/2266/134957/5468/9536/9474/2268/1601/3952/114897/10015/8111/55691/2550/5781	10:Monocyte	1			EOPE	hsa05020	Prion disease	207	-0.472381	-2.40183	1e-10	3.21818e-09	2.27751e-09	2058	tags=44%, list=17%, signal=37%	4710/4726/5692/2906/4723/581/4717/5693/5595/5710/5719/4728/10476/4689/5682/5296/4725/7124/5691/4731/9861/7846/7386/4702/7419/3708/10105/506/3552/5687/5709/522/5714/1345/54205/4695/5704/4701/539/5685/4707/29796/498/126328/55967/4716/5686/6389/9167/4722/4713/10376/51079/4697/7381/1535/1347/9377/1351/203068/7979/5689/516/514/4688/5880/4715/1965/1337/4709/1537/4714/5694/1327/5688/513/4711/1340/10975/…	8:Macrophage-1	2			Whole PE	R-HSA-69613	p53-Independent G1/S DNA damage checkpoint	50	0.540513	2.24171	1.83393e-06	3.47491e-05	2.65437e-05	2563	tags=64%, list=16%, signal=54%	5692/7314/5710/10197/5685/5694/5704/10213/5691/5689/5700/5695/5688/5682/5720/5684/5709/5683/7979/5687/6233/5705/5713/9861/5714/5686/7316/5702/5690/5693/7311/5721	4:CTB-2	2
Whole PE	GO:0002698	negative regulation of immune effector process	93	0.383845	1.71748	0.0008438	0.0295982	0.0256249	1210	tags=25%, list=9%, signal=23%	2896/613/3105/196/3958/7009/3133/27342/10859/5272/51043/7040/3106/11006/7042/3575/1378/8832/961/6504/2213/684/4092	10:Monocyte	1			EOPE	hsa04310	Wnt signaling pathway	106	0.44775	1.95083	5.53728e-06	0.00013068	9.24823e-05	2371	tags=33%, list=20%, signal=27%	23002/5578/4163/8061/896/5530/51701/7482/5534/4773/1454/1488/5533/81029/83439/817/2932/3725/7091/4775/4089/9475/7088/23291/1856/4040/79718/818/6259/1387/27130/1457/4772/10297/5601	8:Macrophage-1	2			Whole PE	R-HSA-5676590	NIK-->noncanonical NF-kB signaling	57	0.51392	2.2139	2.16087e-06	3.93702e-05	3.00736e-05	2563	tags=63%, list=16%, signal=53%	5692/5971/7314/5710/10197/5685/6500/5694/5704/10213/5691/5689/5700/5695/5688/5682/5720/5684/5709/5683/7979/5687/6233/5705/4791/5713/9861/5714/5686/7316/5702/5690/5693/9040/7311/5721	4:CTB-2	2
Whole PE	GO:0051960	regulation of nervous system development	292	0.275745	1.45427	0.000871061	0.0304162	0.0263331	1726	tags=21%, list=13%, signal=19%	6281/1890/5728/4763/3688/5583/1495/1982/5978/6696/1959/302/5916/23028/23654/5970/3569/7097/10512/3845/84376/3398/7040/8898/207/2048/85440/7533/55636/1499/7474/118813/8408/57142/5530/23394/4067/3553/22883/27020/57154/10501/659/22943/706/57609/6259/9693/5270/1605/57698/274/1946/5605/10507/9682/11344/9928/3091/7070/64689	10:Monocyte	1			EOPE	hsa04260	Cardiac muscle contraction	40	-0.567015	-2.17312	9.2114e-06	0.000203802	0.000144231	918	tags=40%, list=8%, signal=37%	7386/1345/29796/9167/7381/1347/9377/1351/1337/1537/1327/1340/10975/1329/7388/1350	8:Macrophage-1	2			Whole PE	R-HSA-5358346	Hedgehog ligand biogenesis	60	0.499963	2.13004	2.16439e-06	3.93702e-05	3.00736e-05	2563	tags=53%, list=16%, signal=45%	5692/7314/5710/10197/5685/5694/5704/10213/5691/5689/5700/5695/5688/5682/5720/5684/5709/5683/7979/5687/6233/5705/5713/9861/5714/5686/7316/5702/5690/5693/7311/5721	4:CTB-2	2
[truncated: 3,520 more rows]

## Sheet: Supplementary Table 4
Supplementary Table 4. Placental single-cell signatures utilized for the integrative analysis
[truncated: 577 more rows]

## Sheet: Supplementary Table 5
Supplementary Table 5.Placental signatures in maternal circulation during normotensive pregnancy
Population	Cell type	p-value
LOPE	0:T-cell	0.087
LOPE	10:Monocyte	0.678
Whole	10:Monocyte	0.741
EOPE	11:STB-1	0.159
Whole	11:STB-1	0.069
Whole	13:Fibroblast	0.773
LOPE	1:CTB	0.065
EOPE	2:NK-cell	0.069
EOPE	3:npiCTB	0.282
[truncated: 15 more rows]

## Sheet: Supplementary Table 6
Supplementary 6.Placental signatures in maternal circulation at or after EOPE diagnosis
[truncated: 10 more rows]

[truncated: 2 more sheets: Supplementary Table 7, Supplementary Table 8]
